# Supplementary material for: Investigation of an Antioxidative System for Salinity Tolerance in Oenanthe javanica
Source: MDPI journal article supplement (doi:10.3390/antiox9100940), 2020-10-01
Supplement: s1 [file s1]

## Supplementary figures

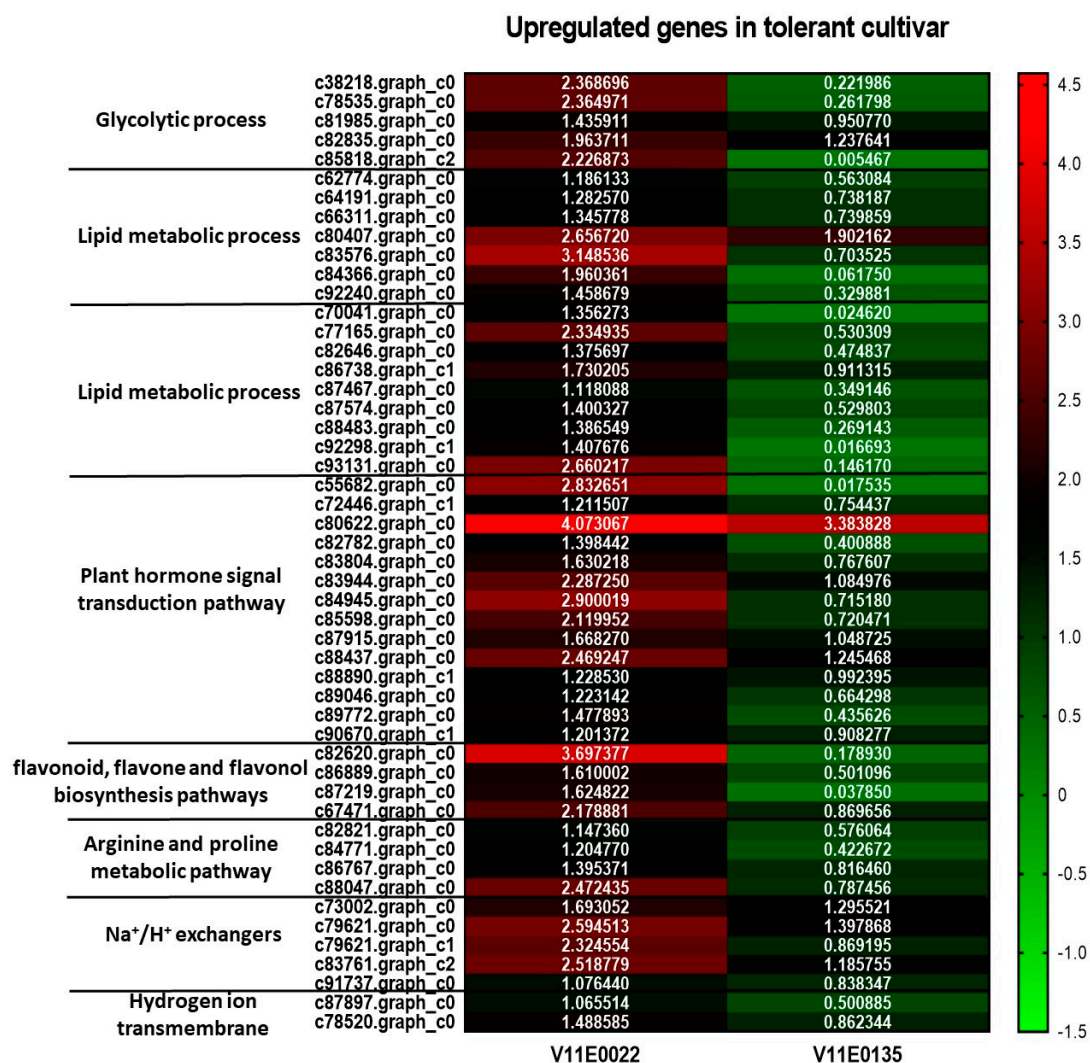

**Supplementary figure 1.** Heat maps of all upregulated DEGs in V11E0022 involved in different biological processes and pathways, and antiporters under salt stress conditions.

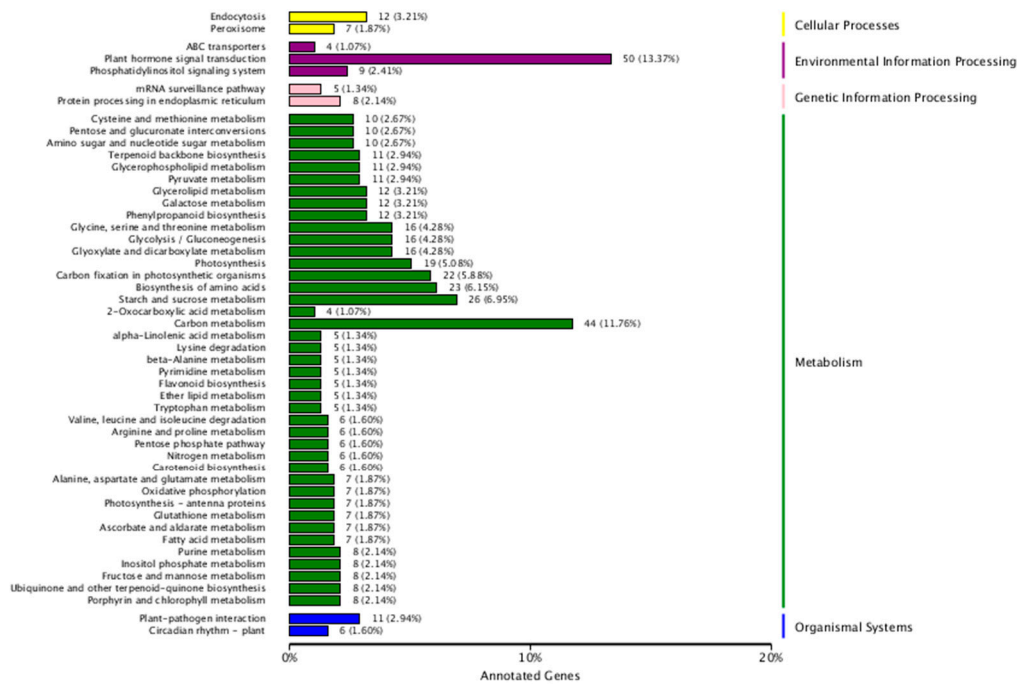

**Supplementary figure 2.** KEGG analysis of all DEGs in V11E0022 cultivar under salt stress treatment

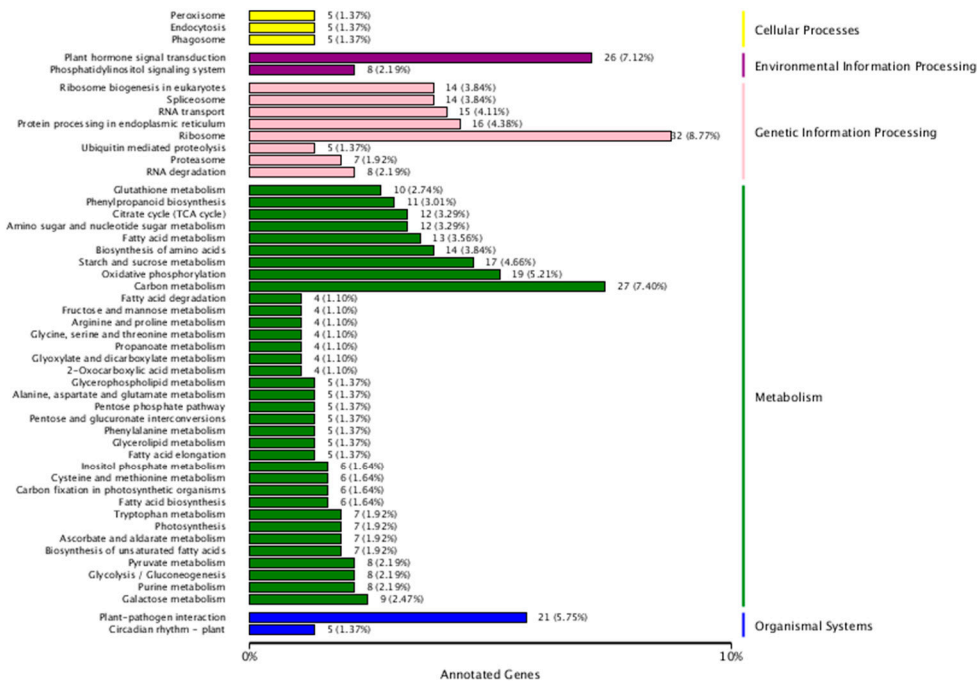

**Supplementary figure 3.** KEGG analysis of all DEGs in V11E0135 cultivar under salt stress treatment.

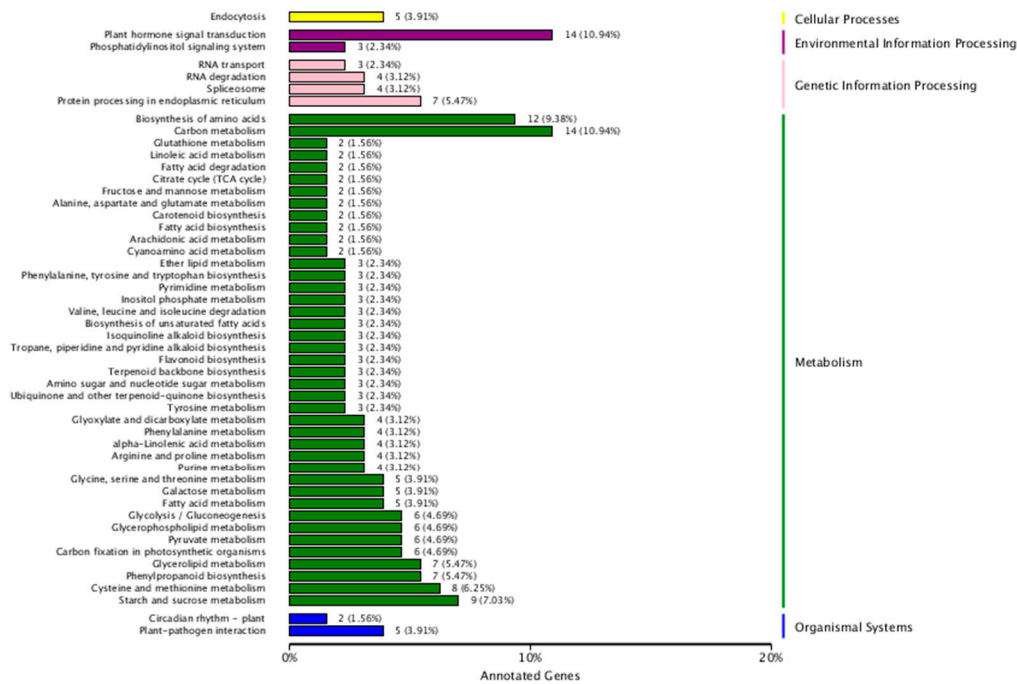

**Supplementary figure 4.** KEGG analysis of upregulated DEGs in V11E0022 cultivar under salt stress treatment.

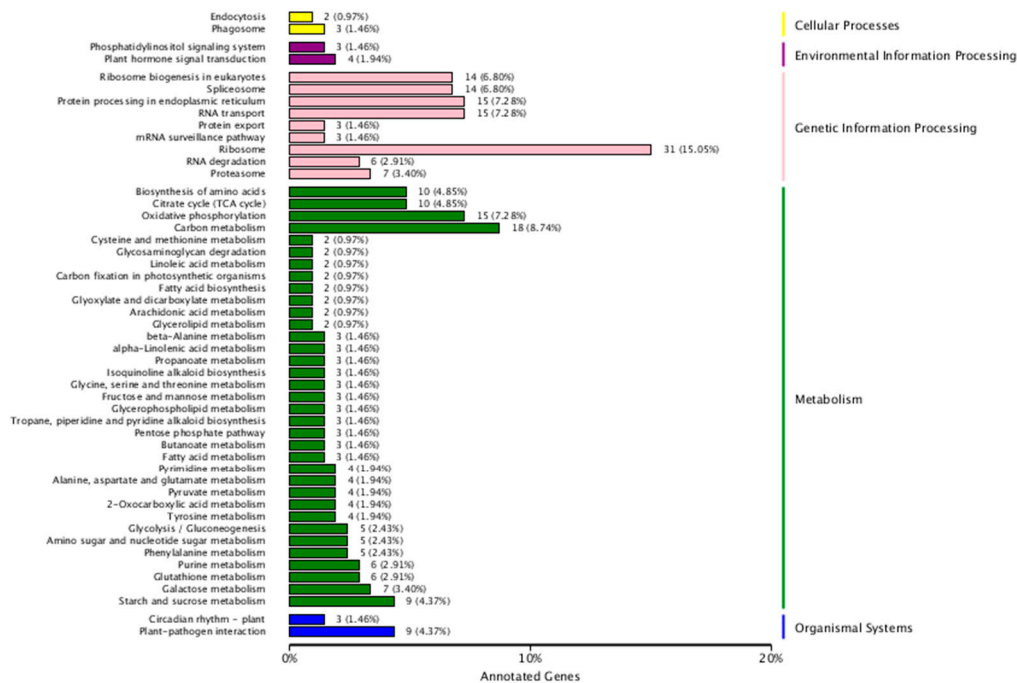

**Supplementary figure 5.** KEGG analysis of upregulated DEGs in V11E0135 cultivar under salt stress treatment.
