# Supplementary material for: Investigation of an Antioxidative System for Salinity Tolerance in Oenanthe javanica
Source: Antioxidants (Basel). 2020 Oct 1;9(10):940. doi: 10.3390/antiox9100940 (PMC7601823; doi:10.3390/antiox9100940)
Supplement: Supplementary file 1 [file antioxidants-09-00940-s001.zip]

Archive with 8 entries (8 files):
- antioxidants-920004-Supplementary figures.pdf
- Supplementary table 1 for qPCR primers.xlsx
- Supplementary table 2 transcriptomic assembly data.xlsx
- Supplementary table 3 DEGs in both cultivars.xlsx
- Supplementary table 4 DEGs annotations.xlsx
- Supplementary table 5 upregulated GO enrichment of DEGs, and GO biological process.xlsx
- Supplementary table 6 KEGG analysis of DEGs.xlsx
- Supplementary table 7 TFs in both cultivars.xlsx
