# Supplementary material for: Investigation of an Antioxidative System for Salinity Tolerance in Oenanthe javanica
Source: Antioxidants (Basel). 2020 Oct 1;9(10):940. doi: 10.3390/antiox9100940 (PMC7601823; doi:10.3390/antiox9100940)
Supplement: Supplementary file 1 [file antioxidants-09-00940-s001.zip › Supplementary table 1 for qPCR primers.xlsx]

## Sheet: Sheet2
qPCR Primer list		Tm
c55427.graph_c0	Actin
Farward primer	TTTCACCACAACAGCAGAGC	55.4
Reverse primer	ACGGAATCTCTCAGCACCAA
c86734.graph_c0	WRKY3
Farward primer	CCACCACAATCTAACAAGCG	55.4
Reverse primer	CCACTTCCTCACTGTCACTT
c76821.graph_c0	MYB2 gene
Farward primer	CTCCATGCTAGATGGGGAAA	55.4
Reverse primer	TCCACTTCATGTTGCCTCTG
c85598.graph_c0	Serine/threonine-protein kinase SAPK2
Farward primer	ATACCCCATCCCAAAGCATT	54.4
Reverse primer	AGAGGGCACACATATTCACC
c80282.graph_c0	Heat stress transcription factor B-2a/ HSFB2A
Farward primer	GCCCTTTCCTTGTTTCCAAA	54.4
Reverse primer	GATCCGTCTTCATTCCAGGA
c79621.graph_c0	Sodium/hydrogen exchenger 2 gene
Farward primer	ATCCTCCATGTTGCCACTTC	54.4
Reverse primer	TTGCAAACCATTATCCGTTG
c78535.graph_c0	Pyruvate kinase
Farward primer	TGTGTGATGCTTAGTGGTGA	54.4
Reverse primer	CACAGCAGAACTAGCCAAAC
c70041.graph_c0	Fatty acid desaturase FAD2
Farward primer	CTTCAAGCGGTCTGTCCTTC	55.4
Reverse primer	AGGCATGATGACCACATTCA
c83141.graph_c0	MYB44
Farward primer	GATAAACCCGTGGATCAGAG	54.4
Reverse primer	GACATCGCCTAGTTTGGTTT
c90670.graph_c1	ABF2
Farward primer	CAGAGTGGAGAAGTGAGCAT	55.4
Reverse primer	TTCTCTTGCGTCTTCTCTCC
c77165.graph_c0	Caffeoylshikimate esterase
Farward primer	GGACTTTGCTCCTTCTCGTA	54.3
Reverse primer	TGCATGTGTCACCATATCCA
