# Supplementary material for: Investigation of an Antioxidative System for Salinity Tolerance in Oenanthe javanica
Source: Antioxidants (Basel). 2020 Oct 1;9(10):940. doi: 10.3390/antiox9100940 (PMC7601823; doi:10.3390/antiox9100940)
Supplement: Supplementary file 1 [file antioxidants-09-00940-s001.zip › Supplementary table 2 transcriptomic assembly data.xlsx]

## Sheet: Sheet1
	Mapping transcriptome reads to reference sequence								Water dropwort transcriptomic assembly
Sample-ID	Sample Description	Clean Reads	Mapped Reads	Mapped Ratio	GC Content	% ≥ Q30			Length Range	Transcript	Unigene
L01-1	V11E0135- control 1	20933415	16379655	0.7825	0.4477	0.9447			300-500	29,506 (21.01%)	21,896 (37.67%)
L01-2	V11E0135- control 2	22055132	16985693	0.7701	0.4496	0.9443			500-1000	33,848 (24.11%)	14,978 (25.77%)
L01-3	V11E0135- control 3	20199124	15610364	0.7728	0.4441	0.9392			1000-2000	45,580 (32.46%)	12,068 (20.76%)
L02-1	V11E0135- treated 1	21659164	16579120	0.7655	0.4407	0.9438			2000+	31,471 (22.41%)	9,184 (15.80%)
L02-2	V11E0135- treated 2	20561350	15662861	0.7618	0.4381	0.9407			Total Number	140405	58126
L02-3	V11E0135- treated 3	21938470	16896231	0.7702	0.4431	0.9413			Total Length	193539529	63493063
L03-1	V11E0022- control 1	23012372	17897995	0.7778	0.4468	0.94			N50 Length	1915	1746
L03-2	V11E0022- control 2	21389021	16599560	0.7761	0.4501	0.9427			Mean Length	1378.44	1092.33
L03-3	V11E0022- control 3	19949630	15594430	0.7817	0.4465	0.9442
L04-1	V11E0022- treated 1	19694924	15281072	0.7759	0.4446	0.938
L04-2	V11E0022- treated 2	21054932	16527882	0.785	0.4399	0.9394
L04-3	V11E0022- treated 3	21512301	16869335	0.7842	0.445	0.9412
