# Supplementary material for: Investigation of an Antioxidative System for Salinity Tolerance in Oenanthe javanica
Source: Antioxidants (Basel). 2020 Oct 1;9(10):940. doi: 10.3390/antiox9100940 (PMC7601823; doi:10.3390/antiox9100940)
Supplement: Supplementary file 1 [file antioxidants-09-00940-s001.zip › Supplementary table 3 DEGs in both cultivars.xlsx]

## Sheet: DEGs in V11E0022
	DEGs in V11E0022
#ID	L03-1_Count	L03-2_Count	L03-3_Count	L04-1_Count	L04-2_Count	L04-3_Count	L03-1_FPKM	L03-2_FPKM	L03-3_FPKM	L04-1_FPKM	L04-2_FPKM	L04-3_FPKM	FDR	log2FC	regulated	COG_class	COG_class_annotation	GO_annotation	KEGG_annotation	KOG_class	KOG_class_annotation	Pfam_annotation	Swissprot_annotation	eggNOG_class	eggNOG_class_annotation	nr_annotation
c77920.graph_c0	171	98	220	1040	1758	1756	14.16	8.73	20.91	102.15	160.43	155.55	1.05108e-18	3.00642	up	--	--	--	--	--	--	--	--	S	Function unknown	PREDICTED: uncharacterized protein LOC108219108 [Daucus carota subsp. sativus]
c90775.graph_c0	406	558	506	1164	1715	982	10.48	12.81	13.23	23.77	34.12	17.88	0.000257065	1.23174	up	[G]	Carbohydrate transport and metabolism	Cellular Component: membrane (GO:0016020);;	--	--	--	BT1 family;; BT1 family	Probable folate-biopterin transporter 9, chloroplastic OS=Arabidopsis thaliana OX=3702 GN=At2g33280 PE=3 SV=2	G	Carbohydrate transport and metabolism	hypothetical protein DCAR_024296 [Daucus carota subsp. sativus]
c88438.graph_c0	1563	1005	2110	3053	5119	4031	29.96	21.66	46.55	70.58	110.56	85.98	0.000339264	1.25085	up	[P]	Inorganic ion transport and metabolism	Molecular Function: potassium ion transmembrane transporter activity (GO:0015079);; Cellular Component: integral component of membrane (GO:0016021);; Biological Process: potassium ion transmembrane transport (GO:0071805);;	K03549|0|sind:105175884|K03549 KUP system potassium uptake protein | (RefSeq) potassium transporter 11	--	--	K+ potassium transporter	Potassium transporter 11 OS=Arabidopsis thaliana OX=3702 GN=POT11 PE=2 SV=1	P	Inorganic ion transport and metabolism	PREDICTED: potassium transporter 11-like [Daucus carota subsp. sativus]
c83423.graph_c0	2217	2370	1588	1200	931	982	52.43	60.04	43.07	33.26	23.87	24.59	0.00365979	-1.03784	down	[OK]	Posttranslational modification, protein turnover, chaperones ;; Transcription	Molecular Function: metalloendopeptidase activity (GO:0004222);; Biological Process: proteolysis (GO:0006508);; Cellular Component: integral component of membrane (GO:0016021);;	--	--	--	Peptidase family M50;; PDZ domain	Membrane metalloprotease ARASP, chloroplastic OS=Arabidopsis thaliana OX=3702 GN=ARASP PE=2 SV=1	M	Cell wall/membrane/envelope biogenesis	PREDICTED: probable membrane metalloprotease ARASP2, chloroplastic [Daucus carota subsp. sativus]
c84692.graph_c2	14225	7825	21969	34630	48187	51247	523.9	304.54	950.04	1516.22	1996.32	2057.71	0.000404009	1.46321	up	[O]	Posttranslational modification, protein turnover, chaperones	Biological Process: proteolysis (GO:0006508);; Molecular Function: cysteine-type peptidase activity (GO:0008234);;	K01373|1.12204e-78|spen:107017618|K01373 cathepsin F [EC:3.4.22.41] | (RefSeq) cysteine proteinase 15A-like	[O]	Posttranslational modification, protein turnover, chaperones	Papain family cysteine protease;; Cathepsin propeptide inhibitor domain (I29);; Papain family cysteine protease	Cysteine proteinase 15A OS=Pisum sativum OX=3888 PE=2 SV=1	O	Posttranslational modification, protein turnover, chaperones	hypothetical protein DCAR_013843 [Daucus carota subsp. sativus]
c84220.graph_c0	178	126	204	394	957	481	11.82	9.03	15.29	30.4	66.71	33.13	3.61754e-05	1.65312	up	--	--	Molecular Function: kinase activity (GO:0016301);;	K08857|6.62775e-29|gra:105799516|K08857 NIMA (never in mitosis gene a)-related kinase 1/4/5 [EC:2.7.11.1] | (RefSeq) serine/threonine-protein kinase Nek6	[R]	General function prediction only	--	Serine/threonine-protein kinase Nek6 OS=Oryza sativa subsp. japonica OX=39947 GN=NEK6 PE=1 SV=2	T	Signal transduction mechanisms	PREDICTED: serine/threonine-protein kinase Nek6-like [Daucus carota subsp. sativus]
c81763.graph_c0	1645	1786	1118	811	745	728	62.81	73.87	48.87	36.38	31.02	29.58	0.00240199	-1.05284	down	[HC]	Coenzyme transport and metabolism ;; Energy production and conversion	Molecular Function: copper ion binding (GO:0005507);; Cellular Component: chloroplast stroma (GO:0009570);; Cellular Component: thylakoid (GO:0009579);; Biological Process: response to cytokinin (GO:0009735);; Cellular Component: chloroplast envelope (GO:0009941);; Molecular Function: oxidoreductase activity (GO:0016491);; Biological Process: oxidation-reduction process (GO:0055114);;	--	--	--	Oxidoreductase NAD-binding domain	Fruit protein pKIWI502 OS=Actinidia deliciosa OX=3627 GN=pKIWI502 PE=2 SV=1	C	Energy production and conversion	PREDICTED: fruit protein pKIWI502-like [Daucus carota subsp. sativus]
c91374.graph_c0	226	276	177	89	100	92	5.42	7.18	4.81	2.79	2.87	2.6	0.000866541	-1.3196	down	--	--	--	--	[R]	General function prediction only	PPR repeat family;; PPR repeat;; DYW family of nucleic acid deaminases;; PPR repeat;; Pentatricopeptide repeat domain	Pentatricopeptide repeat-containing protein At5g03800 OS=Arabidopsis thaliana OX=3702 GN=EMB175 PE=2 SV=1	S	Function unknown	PREDICTED: pentatricopeptide repeat-containing protein At5g03800 [Daucus carota subsp. sativus]
c78199.graph_c0	0	2	2	12	60	30	0	0.09	0.09	0.71	3.73	1.55	0.0010254	2.99559	up	--	--	--	--	[R]	General function prediction only	--	Pentatricopeptide repeat-containing protein At2g48000 OS=Arabidopsis thaliana OX=3702 GN=At2g48000 PE=2 SV=1	S	Function unknown	PREDICTED: pentatricopeptide repeat-containing protein At2g30780-like [Daucus carota subsp. sativus]
c88554.graph_c0	432	356	504	1162	1866	1481	13.67	13.42	18.7	49.62	67.35	53.7	1.39489e-11	1.67097	up	--	--	--	--	--	--	B-box zinc finger;; CCT motif	Zinc finger protein CONSTANS-LIKE 15 OS=Arabidopsis thaliana OX=3702 GN=COL15 PE=1 SV=1	S	Function unknown	PREDICTED: zinc finger protein CONSTANS-LIKE 15 isoform X2 [Daucus carota subsp. sativus]
c81179.graph_c0	13	15	12	61	81	84	1.06	1.18	1.12	6.33	7.85	8.18	3.04293e-05	2.19624	up	--	--	--	--	--	--	--	--	--	--	hypothetical protein DCAR_006751 [Daucus carota subsp. sativus]
c86001.graph_c0	1629	677	1415	357	256	251	33.47	14.79	33.14	9.22	8.49	7.11	1.12585e-07	-2.04755	down	--	--	--	--	[R]	General function prediction only	--	--	S	Function unknown	PREDICTED: uncharacterized protein At4g22758-like [Daucus carota subsp. sativus]
c84547.graph_c0	2705	2953	2453	1420	986	1380	52.34	59.34	54.09	36.72	22.94	31.64	0.000853918	-1.13885	down	[J]	Translation, ribosomal structure and biogenesis	Biological Process: ribosomal large subunit assembly (GO:0000027);; Molecular Function: structural constituent of ribosome (GO:0003735);; Cellular Component: ribosome (GO:0005840);; Biological Process: translation (GO:0006412);; Cellular Component: chloroplast (GO:0009507);; Molecular Function: rRNA binding (GO:0019843);;	K02963|4.92387e-58|mtr:MTR_4g051350|K02963 small subunit ribosomal protein S18 | (RefSeq) 50S ribosomal protein L33	[J]	Translation, ribosomal structure and biogenesis	Ribosomal protein L20;; Ribosomal protein S18;; Ribosomal protein L33	50S ribosomal protein L20, chloroplastic OS=Panax ginseng OX=4054 GN=rpl20 PE=3 SV=1	J	Translation, ribosomal structure and biogenesis	ribosomal protein L20 (chloroplast) [Hansenia weberbaueriana]
c84422.graph_c0	674	990	417	227	47	161	30.49	48.21	21.64	12.11	2.32	7.76	0.00178681	-2.04083	down	[K]	Transcription	Cellular Component: cell wall (GO:0005618);; Cellular Component: plasmodesma (GO:0009506);; Cellular Component: chloroplast (GO:0009507);; Cellular Component: membrane (GO:0016020);; Cellular Component: apoplast (GO:0048046);;	--	[R]	General function prediction only	Leucine rich repeat;; Leucine Rich Repeat;; Leucine rich repeat N-terminal domain;; Leucine Rich repeat;; Leucine Rich repeats (2 copies)	DNA damage-repair/toleration protein DRT100 OS=Arabidopsis thaliana OX=3702 GN=DRT100 PE=2 SV=2	S	Function unknown	PREDICTED: DNA-damage-repair/toleration protein DRT100 [Daucus carota subsp. sativus]
c76536.graph_c0	57	57	67	114	175	160	1.38	2.35	1.86	3.26	4.79	4.91	0.0049784	1.16085	up	[T]	Signal transduction mechanisms	Molecular Function: protein kinase activity (GO:0004672);; Molecular Function: ATP binding (GO:0005524);; Biological Process: protein phosphorylation (GO:0006468);;	--	[T]	Signal transduction mechanisms	Protein tyrosine kinase;; Protein kinase domain	Probable serine/threonine-protein kinase PIX7 OS=Arabidopsis thaliana OX=3702 GN=PIX7 PE=1 SV=1	T	Signal transduction mechanisms	PREDICTED: probable receptor-like protein kinase At3g55450 [Daucus carota subsp. sativus]
c78117.graph_c0	1888	2706	1607	834	828	661	112.51	173.46	109.85	58.72	54.11	42.01	2.58286e-05	-1.47135	down	[O]	Posttranslational modification, protein turnover, chaperones	Biological Process: protein peptidyl-prolyl isomerization (GO:0000413);; Molecular Function: peptidyl-prolyl cis-trans isomerase activity (GO:0003755);; Molecular Function: FK506 binding (GO:0005528);; Cellular Component: endoplasmic reticulum membrane (GO:0005789);; Cellular Component: chloroplast thylakoid membrane (GO:0009535);; Biological Process: chaperone-mediated protein folding (GO:006107…	K01802|1.06066e-81|vvi:100268058|K01802 peptidylprolyl isomerase [EC:5.2.1.8] | (RefSeq) photosynthetic NDH subunit of lumenal location 4, chloroplastic	[O]	Posttranslational modification, protein turnover, chaperones	FKBP-type peptidyl-prolyl cis-trans isomerase	Photosynthetic NDH subunit of lumenal location 4, chloroplastic OS=Arabidopsis thaliana OX=3702 GN=PNSL4 PE=1 SV=1	O	Posttranslational modification, protein turnover, chaperones	PREDICTED: photosynthetic NDH subunit of lumenal location 4, chloroplastic [Daucus carota subsp. sativus]
c86143.graph_c0	898	676	886	1755	1915	2382	31.83	26.1	34.01	67.67	70.28	82.59	3.50519e-06	1.20038	up	--	--	Biological Process: transcription, DNA-templated (GO:0006351);;	--	--	--	--	NAC domain containing protein 52 OS=Arabidopsis thaliana OX=3702 GN=NAC052 PE=1 SV=1	S	Function unknown	PREDICTED: NAC domain-containing protein 78 isoform X2 [Daucus carota subsp. sativus]
c91916.graph_c0	35	290	117	29	11	18	2.76	25.4	11.93	3.16	0.91	1.33	0.00232351	-2.45215	down	[K]	Transcription	Molecular Function: ATP binding (GO:0005524);; Biological Process: protein phosphorylation (GO:0006468);; Cellular Component: integral component of membrane (GO:0016021);; Molecular Function: 2-alkenal reductase [NAD(P)] activity (GO:0032440);; Molecular Function: tau-protein kinase activity (GO:0050321);; Biological Process: oxidation-reduction process (GO:0055114);;	--	--	--	Protein kinase domain;; Protein tyrosine kinase	Probably inactive leucine-rich repeat receptor-like protein kinase At3g28040 OS=Arabidopsis thaliana OX=3702 GN=At3g28040 PE=2 SV=1	S	Function unknown	PREDICTED: probably inactive leucine-rich repeat receptor-like protein kinase At3g28040 [Daucus carota subsp. sativus]
c91013.graph_c0	3	2	3	23	55	42	0.82	0.58	0.94	7.92	17.2	12.41	6.91628e-05	3.01019	up	--	--	Molecular Function: aspartic-type endopeptidase activity (GO:0004190);; Biological Process: proteolysis (GO:0006508);;	--	[O]	Posttranslational modification, protein turnover, chaperones	Xylanase inhibitor C-terminal	Probable aspartyl protease At4g16563 OS=Arabidopsis thaliana OX=3702 GN=At4g16563 PE=2 SV=1	O	Posttranslational modification, protein turnover, chaperones	PREDICTED: aspartic proteinase nepenthesin-1 [Daucus carota subsp. sativus]
c91791.graph_c0	678	1068	651	207	289	159	22.25	37.39	24.35	8.02	9.84	5.48	5.91547e-07	-1.91171	down	[C]	Energy production and conversion	Molecular Function: oxidoreductase activity (GO:0016491);; Biological Process: oxidation-reduction process (GO:0055114);;	K17871|0|tcc:TCM_041600|K17871 NADH:ubiquinone reductase (non-electrogenic) [EC:1.6.5.9] | (RefSeq) Alternative NAD(P)H dehydrogenase 1	[C]	Energy production and conversion	Pyridine nucleotide-disulphide oxidoreductase;; Pyridine nucleotide-disulphide oxidoreductase	Internal alternative NAD(P)H-ubiquinone oxidoreductase A2, mitochondrial OS=Arabidopsis thaliana OX=3702 GN=NDA2 PE=1 SV=1	C	Energy production and conversion	PREDICTED: internal alternative NAD(P)H-ubiquinone oxidoreductase A2, mitochondrial-like [Daucus carota subsp. sativus]
c87687.graph_c1	77	34	69	158	229	222	4.26	2.12	4.49	10.85	14.24	14.04	0.000201898	1.59926	up	--	--	--	--	[E]	Amino acid transport and metabolism	--	FACT complex subunit SPT16 OS=Zea mays OX=4577 GN=SPT16 PE=2 SV=1	K	Transcription	hypothetical protein DCAR_005264 [Daucus carota subsp. sativus]
c81765.graph_c0	321	193	435	617	950	688	19.15	12.38	30.54	44.41	66.73	45.7	0.00484336	1.11762	up	--	--	Cellular Component: trans-Golgi network (GO:0005802);; Cellular Component: plasma membrane (GO:0005886);; Cellular Component: integral component of membrane (GO:0016021);;	--	[U]	Intracellular trafficking, secretion, and vesicular transport	EXS family	Phosphate transporter PHO1 homolog 5 OS=Arabidopsis thaliana OX=3702 GN=PHO1-H5 PE=2 SV=2	T	Signal transduction mechanisms	PREDICTED: phosphate transporter PHO1 homolog 3-like [Daucus carota subsp. sativus]
c90134.graph_c0	2914	3157	2600	1027	488	660	74.39	87.63	77.03	31.19	13.98	18.44	5.40153e-07	-1.95996	down	--	--	--	K17710|3.58455e-154|vvi:100247419|K17710 pentatricopeptide repeat domain-containing protein 1 | (RefSeq) pentatricopeptide repeat-containing protein At5g25630	[R]	General function prediction only	PPR repeat family;; PPR repeat;; PPR repeat;; Pentatricopeptide repeat domain;; Pentacotripeptide-repeat region of PRORP;; Mitochondrial ATPase expression;; PPR repeat;; PPR repeat family;; PPR repeat;; Pentatricopeptide repeat domain;; Pentacotripeptide-repeat region of PRORP	Pentatricopeptide repeat-containing protein At5g21222 OS=Arabidopsis thaliana OX=3702 GN=ATC401 PE=2 SV=1	S	Function unknown	PREDICTED: pentatricopeptide repeat-containing protein At5g21222-like [Daucus carota subsp. sativus]
c91149.graph_c0	1743	1753	2523	6778	6628	10002	58.55	64.02	93.99	274.8	242.97	367.84	1.01701e-08	1.82226	up	--	--	Cellular Component: nucleosome (GO:0000786);; Molecular Function: DNA binding (GO:0003677);; Cellular Component: nucleolus (GO:0005730);; Cellular Component: mitochondrion (GO:0005739);; Biological Process: nucleosome assembly (GO:0006334);;	K11275|2.4236e-21|eus:EUTSA_v10017069mg|K11275 histone H1/5 | (RefSeq) hypothetical protein	--	--	linker histone H1 and H5 family	Histone H1.2 OS=Arabidopsis thaliana OX=3702 GN=At2g30620 PE=1 SV=1	S	Function unknown	PREDICTED: histone H1 [Daucus carota subsp. sativus]
c92426.graph_c0	299	204	248	91	90	58	17.3	13.98	17.39	6.31	4.76	3.08	2.18087e-06	-1.66526	down	[K]	Transcription	--	--	[T]	Signal transduction mechanisms	NB-ARC domain	Putative disease resistance protein RGA1 OS=Solanum bulbocastanum OX=147425 GN=RGA1 PE=2 SV=2	S	Function unknown	hypothetical protein DCAR_024486 [Daucus carota subsp. sativus]
c78726.graph_c0	504	516	537	942	1962	1568	19.98	21.25	23.96	40.3	83.6	61.67	1.67912e-05	1.36543	up	[E]	Amino acid transport and metabolism	Molecular Function: L-tyrosine:2-oxoglutarate aminotransferase activity (GO:0004838);; Biological Process: cellular amino acid metabolic process (GO:0006520);; Biological Process: vitamin E biosynthetic process (GO:0010189);; Molecular Function: pyridoxal phosphate binding (GO:0030170);;	K00815|0|pper:PRUPE_ppa006368mg|K00815 tyrosine aminotransferase [EC:2.6.1.5] | (RefSeq) hypothetical protein	[E]	Amino acid transport and metabolism	Aminotransferase class I and II;; Beta-eliminating lyase	Probable aminotransferase TAT2 OS=Arabidopsis thaliana OX=3702 GN=At5g53970 PE=2 SV=1	E	Amino acid transport and metabolism	PREDICTED: probable aminotransferase TAT2 [Daucus carota subsp. sativus]
c89350.graph_c0	404	340	511	865	1321	1066	12.88	10.55	20.24	26.03	47.49	29.83	4.17613e-06	1.24961	up	[H]	Coenzyme transport and metabolism	Cellular Component: mitochondrial inner membrane (GO:0005743);; Molecular Function: alternative oxidase activity (GO:0009916);; Cellular Component: integral component of membrane (GO:0016021);; Molecular Function: metal ion binding (GO:0046872);; Biological Process: oxidation-reduction process (GO:0055114);; Cellular Component: respiratory chain (GO:0070469);;	K17893|1.66571e-113|gra:105795073|K17893 ubiquinol oxidase [EC:1.10.3.11] | (RefSeq) ubiquinol oxidase, mitochondrial-like	--	--	Alternative oxidase	Ubiquinol oxidase 2, mitochondrial OS=Glycine max OX=3847 GN=AOX2 PE=1 SV=2	S	Function unknown	mitochondrial alternative oxidase 2a [Daucus carota]
c76782.graph_c0	28	25	35	68	109	79	1.05	1.01	1.51	3.01	4.47	3.21	0.00893489	1.34823	up	--	--	Cellular Component: chloroplast thylakoid membrane (GO:0009535);; Cellular Component: chloroplast envelope (GO:0009941);;	--	--	--	--	Uncharacterized protein At4g37920 OS=Arabidopsis thaliana OX=3702 GN=At4g37920 PE=2 SV=2	S	Function unknown	PREDICTED: uncharacterized protein At4g37920, chloroplastic [Daucus carota subsp. sativus]
c84944.graph_c0	19	17	32	76	132	96	0.65	0.63	1.21	3.11	4.87	3.45	0.000228802	1.9008	up	[O]	Posttranslational modification, protein turnover, chaperones	--	K03686|1.1892e-107|sot:102588922|K03686 molecular chaperone DnaJ | (RefSeq) chaperone protein dnaJ 1, mitochondrial	[O]	Posttranslational modification, protein turnover, chaperones	DnaJ domain;; DnaJ central domain	Chaperone protein dnaJ 1, mitochondrial OS=Arabidopsis thaliana OX=3702 GN=ATJ1 PE=2 SV=2	O	Posttranslational modification, protein turnover, chaperones	PREDICTED: chaperone protein dnaJ 1, mitochondrial isoform X2 [Daucus carota subsp. sativus]
c77912.graph_c0	8	154	20	0	3	0	0.63	13.09	1.81	0	0.26	0	0.000705714	-3.28158	down	--	--	--	--	--	--	Pollen proteins Ole e I like	Pollen-specific protein-like At4g18596 OS=Arabidopsis thaliana OX=3702 GN=At4g18596 PE=2 SV=1	S	Function unknown	PREDICTED: major pollen allergen Ole e 1-like [Daucus carota subsp. sativus]
c88833.graph_c0	786	433	741	1496	2001	1995	54.06	32.86	60.28	119.75	151.08	151.65	2.0762e-06	1.37791	up	--	--	Cellular Component: integral component of membrane (GO:0016021);;	--	--	--	PLATZ transcription factor;; DM DNA binding domain	--	S	Function unknown	PREDICTED: uncharacterized protein LOC108218451 [Daucus carota subsp. sativus]
c81319.graph_c0	173	197	134	37	10	38	5.82	7.04	5.12	1.35	0.36	1.29	0.000110812	-2.33193	down	--	--	--	--	--	--	--	--	S	Function unknown	hypothetical protein DCAR_024854 [Daucus carota subsp. sativus]
c80173.graph_c1	209	130	240	458	479	521	8.54	5.72	11.25	22.06	21.37	22.73	0.000268848	1.22515	up	--	--	Molecular Function: zinc ion binding (GO:0008270);; Cellular Component: integral component of membrane (GO:0016021);;	K10661|2.43664e-157|vvi:100262331|K10661 E3 ubiquitin-protein ligase MARCH6 [EC:2.3.2.27] | (RefSeq) probable E3 ubiquitin ligase SUD1	[A]	RNA processing and modification	--	Probable E3 ubiquitin ligase SUD1 OS=Arabidopsis thaliana OX=3702 GN=SUD1 PE=1 SV=1	O	Posttranslational modification, protein turnover, chaperones	hypothetical protein DCAR_022010 [Daucus carota subsp. sativus]
c90438.graph_c0	19	22	14	83	102	146	1.44	1.81	1.15	7.19	8.6	11.48	9.08981e-06	2.28907	up	--	--	--	--	--	--	--	Protein ENHANCED DOWNY MILDEW 2 OS=Arabidopsis thaliana OX=3702 GN=EDM2 PE=1 SV=1	S	Function unknown	hypothetical protein DCAR_019722 [Daucus carota subsp. sativus]
c89498.graph_c0	716	670	777	1051	2719	2026	22.32	19.7	25.12	29.12	82.15	50.56	0.00106117	1.25276	up	--	--	Cellular Component: integral component of membrane (GO:0016021);;	--	--	--	Protein of unknown function (DUF3537);; Protein of unknown function (DUF3537)	Non-specific lipid-transfer protein OS=Pinus taeda OX=3352 PE=2 SV=1	S	Function unknown	hypothetical protein DCAR_030881 [Daucus carota subsp. sativus]
c76697.graph_c0	14	36	14	0	1	0	0.63	1.73	0.72	0	0.05	0	0.000613508	-3.26273	down	[GI]	Carbohydrate transport and metabolism ;; Lipid transport and metabolism	Cellular Component: cell wall (GO:0005618);; Cellular Component: integral component of membrane (GO:0016021);; Molecular Function: pectinesterase activity (GO:0030599);; Biological Process: cell wall modification (GO:0042545);; Molecular Function: aspartyl esterase activity (GO:0045330);; Biological Process: pectin catabolic process (GO:0045490);;	--	--	--	Pectinesterase	Probable pectinesterase 68 OS=Arabidopsis thaliana OX=3702 GN=PME68 PE=2 SV=1	G	Carbohydrate transport and metabolism	PREDICTED: probable pectinesterase 68 [Daucus carota subsp. sativus]
c83762.graph_c0	3875	2790	2375	1186	683	1131	75.89	58.98	53.61	28.27	16.1	25.16	3.26177e-05	-1.57359	down	[QV]	Secondary metabolites biosynthesis, transport and catabolism ;; Defense mechanisms	Molecular Function: oxidoreductase activity (GO:0016491);; Molecular Function: metal ion binding (GO:0046872);;	--	[U]	Intracellular trafficking, secretion, and vesicular transport	Cytochrome P450;; Reticulon;; Cytochrome P450	7-ethoxycoumarin O-deethylase OS=Helianthus tuberosus OX=4233 GN=CYP76B1 PE=1 SV=1	Q	Secondary metabolites biosynthesis, transport and catabolism	cytochrome p450 [Thapsia garganica]
c81909.graph_c0	168	151	118	65	78	49	6.05	5.79	5	2.76	3.04	1.82	0.00459402	-1.22519	down	[R]	General function prediction only	Molecular Function: oxidoreductase activity (GO:0016491);; Biological Process: oxidation-reduction process (GO:0055114);;	K07007|0|sly:101252847|K07007 uncharacterized protein | (RefSeq) uncharacterized protein YtfP	--	--	HI0933-like protein;; FAD binding domain;; HI0933-like protein	--	S	Function unknown	PREDICTED: uncharacterized protein YtfP [Daucus carota subsp. sativus]
c88576.graph_c0	313	510	330	103	67	69	14.81	25.99	17.9	5.73	3.5	3.54	1.95504e-07	-2.22793	down	--	--	--	--	--	--	--	--	--	--	PREDICTED: probable protein phosphatase 2C 71 isoform X2 [Daucus carota subsp. sativus]
c85132.graph_c0	144	107	60	10	23	16	8.92	7.23	3.89	0.61	1.54	0.77	9.38691e-06	-2.49185	down	[HI]	Coenzyme transport and metabolism ;; Lipid transport and metabolism	Molecular Function: 1-deoxy-D-xylulose-5-phosphate synthase activity (GO:0008661);; Biological Process: terpenoid biosynthetic process (GO:0016114);;	K01662|1.35076e-142|jcu:105641710|K01662 1-deoxy-D-xylulose-5-phosphate synthase [EC:2.2.1.7] | (RefSeq) probable 1-deoxy-D-xylulose-5-phosphate synthase 2, chloroplastic	[G]	Carbohydrate transport and metabolism	1-deoxy-D-xylulose-5-phosphate synthase;; 1-deoxy-D-xylulose-5-phosphate synthase	Probable 1-deoxy-D-xylulose-5-phosphate synthase 2, chloroplastic OS=Oryza sativa subsp. japonica OX=39947 GN=Os07g0190000 PE=2 SV=1	H	Coenzyme transport and metabolism	PREDICTED: probable 1-deoxy-D-xylulose-5-phosphate synthase 2, chloroplastic [Daucus carota subsp. sativus]
c74651.graph_c0	40	46	20	7	2	6	4.92	6.01	2.8	1.03	0.27	0.78	0.00680707	-2.28369	down	--	--	Molecular Function: glutathione transferase activity (GO:0004364);; Cellular Component: cytoplasm (GO:0005737);; Biological Process: glutathione metabolic process (GO:0006749);; Biological Process: toxin catabolic process (GO:0009407);;	K00799|3.93806e-40|pop:POPTR_0010s03960g|K00799 glutathione S-transferase [EC:2.5.1.18] | (RefSeq) hypothetical protein	[O]	Posttranslational modification, protein turnover, chaperones	Glutathione S-transferase, C-terminal domain;; Glutathione S-transferase, C-terminal domain	Glutathione S-transferase U18 OS=Arabidopsis thaliana OX=3702 GN=GSTU18 PE=2 SV=1	O	Posttranslational modification, protein turnover, chaperones	PREDICTED: glutathione S-transferase U17-like [Daucus carota subsp. sativus]
c82747.graph_c0	110	137	104	8	10	5	5.67	7.63	6.22	0.48	0.86	0.3	3.01257e-13	-3.66167	down	[TK]	Signal transduction mechanisms ;; Transcription	Biological Process: phosphorelay signal transduction system (GO:0000160);; Cellular Component: intracellular (GO:0005622);; Molecular Function: kinase activity (GO:0016301);; Biological Process: phosphorylation (GO:0016310);;	K14492|3.3553e-75|sind:105157140|K14492 two-component response regulator ARR-A family | (RefSeq) two-component response regulator ARR5-like	[K]	Transcription	Response regulator receiver domain	Two-component response regulator ARR5 OS=Arabidopsis thaliana OX=3702 GN=ARR5 PE=1 SV=2	K	Transcription	hypothetical protein DCAR_032303 [Daucus carota subsp. sativus]
c88812.graph_c2	13988	16872	11807	7264	6163	6652	257.08	333.13	249.39	161	124.99	132.56	0.000249969	-1.14662	down	[G]	Carbohydrate transport and metabolism	Molecular Function: protein serine/threonine kinase activity (GO:0004674);; Molecular Function: ATP binding (GO:0005524);; Cellular Component: nucleus (GO:0005634);; Cellular Component: cytoplasm (GO:0005737);; Biological Process: protein phosphorylation (GO:0006468);; Biological Process: intracellular signal transduction (GO:0035556);;	K14498|6.73275e-71|vvi:100249013|K14498 serine/threonine-protein kinase SRK2 [EC:2.7.11.1] | (RefSeq) serine/threonine-protein kinase SRK2A	[T]	Signal transduction mechanisms	Protein kinase domain	Serine/threonine-protein kinase SAPK7 OS=Oryza sativa subsp. japonica OX=39947 GN=SAPK7 PE=2 SV=2	T	Signal transduction mechanisms	PREDICTED: serine/threonine-protein kinase SRK2G-like [Daucus carota subsp. sativus]
c79626.graph_c0	0	0	0	17	88	39	0	0	0	1.29	6.51	2.9	4.04483e-07	4.35816	up	--	--	--	--	--	--	--	--	--	--	PREDICTED: probable protein phosphatase 2C 50 [Daucus carota subsp. sativus]
c79907.graph_c0	65939	96389	56087	38184	20169	33251	9438.01	15592.9	9577.4	6584.5	3121.01	5139.07	0.00726525	-1.26285	down	--	--	Cellular Component: photosystem I (GO:0009522);; Cellular Component: photosystem II (GO:0009523);; Cellular Component: chloroplast thylakoid membrane (GO:0009535);; Biological Process: photosynthesis, light harvesting (GO:0009765);; Cellular Component: integral component of membrane (GO:0016021);; Molecular Function: chlorophyll binding (GO:0016168);; Biological Process: protein-chromophore linka…	K08913|1.83825e-23|jcu:105641493|K08913 light-harvesting complex II chlorophyll a/b binding protein 2 | (RefSeq) chlorophyll a-b binding protein 151, chloroplastic	--	--	--	Chlorophyll a-b binding protein, chloroplastic (Fragment) OS=Silene latifolia subsp. alba OX=52853 PE=2 SV=2	J	Translation, ribosomal structure and biogenesis	hypothetical protein SETIT_037076mg [Setaria italica]
c76849.graph_c0	187	45	138	24	27	27	10.69	2.64	8.58	1.63	1.55	1.7	0.000864037	-2.04565	down	--	--	Molecular Function: calcium ion binding (GO:0005509);; Molecular Function: calcium-dependent phospholipid binding (GO:0005544);;	--	[U]	Intracellular trafficking, secretion, and vesicular transport	Annexin	Annexin D5 OS=Arabidopsis thaliana OX=3702 GN=ANN5 PE=2 SV=2	S	Function unknown	PREDICTED: annexin D5-like [Daucus carota subsp. sativus]
c75921.graph_c0	322	150	150	54	41	43	46.54	22.61	32.68	13.18	8.92	9.87	7.62526e-06	-2.07506	down	--	--	--	--	--	--	--	--	--	--	PREDICTED: transcription factor bHLH130-like isoform X2 [Daucus carota subsp. sativus]
c81388.graph_c0	103	91	278	337	1696	925	7.54	6.96	17.57	21.24	95.62	50.77	0.000292567	2.22995	up	[Q]	Secondary metabolites biosynthesis, transport and catabolism	Molecular Function: metal ion binding (GO:0046872);; Molecular Function: dioxygenase activity (GO:0051213);;	--	[QR]	--	2OG-Fe(II) oxygenase superfamily	Gibberellin 2-beta-dioxygenase 8 OS=Arabidopsis thaliana OX=3702 GN=GA2OX8 PE=1 SV=2	S	Function unknown	PREDICTED: gibberellin 2-beta-dioxygenase 8 [Daucus carota subsp. sativus]
c83598.graph_c1	117	75	252	382	1127	997	4.96	3.44	12.45	18.92	52.61	45.19	6.23129e-05	2.18179	up	[E]	Amino acid transport and metabolism	Cellular Component: plasma membrane (GO:0005886);;	K00547|5.50975e-175|sind:105171316|K00547 homocysteine S-methyltransferase [EC:2.1.1.10] | (RefSeq) homocysteine S-methyltransferase 2	[E]	Amino acid transport and metabolism	Homocysteine S-methyltransferase	Homocysteine S-methyltransferase 2 OS=Arabidopsis thaliana OX=3702 GN=HMT-2 PE=1 SV=1	E	Amino acid transport and metabolism	PREDICTED: homocysteine S-methyltransferase 2-like [Daucus carota subsp. sativus]
c71231.graph_c0	25	29	91	124	364	410	1.71	1.92	7.19	9.89	28.06	31.26	0.000801161	2.2075	up	--	--	--	--	--	--	--	--	S	Function unknown	PREDICTED: uncharacterized protein LOC108226518 [Daucus carota subsp. sativus]
c82269.graph_c0	164	98	211	312	534	471	6.53	4.27	9.24	13.49	21.51	18.24	0.00105174	1.33098	up	--	--	--	K20557|4.9165e-68|pop:POPTR_0002s07020g|K20557 transcription factor VIP1 | (RefSeq) POPTRDRAFT_411874; hypothetical protein	--	--	bZIP transcription factor;; Basic region leucine zipper	Transcription factor VIP1 OS=Arabidopsis thaliana OX=3702 GN=VIP1 PE=1 SV=1	K	Transcription	PREDICTED: transcription factor VIP1 [Daucus carota subsp. sativus]
c78710.graph_c0	70	116	42	3	2	6	3.79	6.96	2.58	0.21	0.09	0.37	1.72648e-07	-3.63543	down	--	--	--	--	--	--	--	--	S	Function unknown	PREDICTED: uncharacterized protein LOC108212448 [Daucus carota subsp. sativus]
c76843.graph_c0	26	6	61	191	93	348	2.07	0.51	5.67	18.32	8.29	30.33	0.00477669	2.24891	up	[V]	Defense mechanisms	Molecular Function: ATP binding (GO:0005524);; Cellular Component: integral component of membrane (GO:0016021);; Molecular Function: ATPase activity, coupled to transmembrane movement of substances (GO:0042626);; Biological Process: transmembrane transport (GO:0055085);;	--	[Q]	Secondary metabolites biosynthesis, transport and catabolism	ABC transporter	ABC transporter C family member 3 OS=Arabidopsis thaliana OX=3702 GN=ABCC3 PE=1 SV=1	V	Defense mechanisms	PREDICTED: ABC transporter C family member 3-like [Daucus carota subsp. sativus]
c72999.graph_c0	7	39	29	0	1	0	0.39	2.37	1.88	0	0.06	0	0.000515532	-3.31156	down	--	--	--	--	[R]	General function prediction only	Leucine Rich repeats (2 copies);; Leucine rich repeat	Piriformospora indica-insensitive protein 2 OS=Arabidopsis thaliana OX=3702 GN=PII-2 PE=2 SV=1	S	Function unknown	unnamed protein product, partial [Vitis vinifera]
c81876.graph_c0	213	112	164	48	84	47	9.2	5.43	8.02	2.84	4.85	2.53	0.001106	-1.45879	down	--	--	Molecular Function: metal ion binding (GO:0046872);;	--	--	--	gag-polypeptide of LTR copia-type;; Zinc knuckle	Retrovirus-related Pol polyprotein from transposon TNT 1-94 OS=Nicotiana tabacum OX=4097 PE=2 SV=1	L	Replication, recombination and repair	uncharacterized protein LOC109823125 [Asparagus officinalis]
c80739.graph_c0	78	79	43	19	16	23	3.52	3.82	2.23	1.02	0.79	1.11	0.00754481	-1.68342	down	--	;;	Molecular Function: nucleotide binding (GO:0000166);; Molecular Function: protein kinase activity (GO:0004672);; Cellular Component: endosome (GO:0005768);; Cellular Component: membrane (GO:0016020);;	--	[T]	Signal transduction mechanisms	Protein kinase domain;; Protein tyrosine kinase	Receptor-like serine/threonine-protein kinase NCRK OS=Arabidopsis thaliana OX=3702 GN=NCRK PE=1 SV=1	T	Signal transduction mechanisms	PREDICTED: receptor-like serine/threonine-protein kinase NCRK isoform X1 [Daucus carota subsp. sativus]
c87266.graph_c0	27	14	35	70	97	94	0.61	0.33	0.87	1.91	2.8	2.31	0.00568969	1.56638	up	[L]	Replication, recombination and repair	Molecular Function: ATP-dependent RNA helicase activity (GO:0004004);; Biological Process: RNA secondary structure unwinding (GO:0010501);; Molecular Function: organic cyclic compound binding (GO:0097159);; Molecular Function: heterocyclic compound binding (GO:1901363);;	--	[A]	RNA processing and modification	DEAD/DEAH box helicase;; Helicase conserved C-terminal domain;; Type III restriction enzyme, res subunit	Putative DEAD-box ATP-dependent RNA helicase 33 OS=Arabidopsis thaliana OX=3702 GN=RH33 PE=3 SV=1	L	Replication, recombination and repair	PREDICTED: probable DEAD-box ATP-dependent RNA helicase 48 isoform X2 [Daucus carota subsp. sativus]
c83236.graph_c0	1336	1323	856	413	91	224	45.57	48.85	33.69	16.59	3.51	8.16	0.000342343	-2.08204	down	[QV]	Secondary metabolites biosynthesis, transport and catabolism ;; Defense mechanisms	Molecular Function: monooxygenase activity (GO:0004497);; Molecular Function: iron ion binding (GO:0005506);; Biological Process: multicellular organism development (GO:0007275);; Biological Process: brassinosteroid homeostasis (GO:0010268);; Cellular Component: integral component of membrane (GO:0016021);; Biological Process: sterol metabolic process (GO:0016125);; Biological Process: brassinost…	K12640|0|vvi:100232983|K12640 brassinosteroid-6-oxidase 2 [EC:1.14.-.-] | (RefSeq) BR6OX1; brassinosteroid-6-oxidase	[QI]	--	Cytochrome P450;; Cytochrome P450	Cytochrome P450 85A1 OS=Solanum lycopersicum OX=4081 GN=CYP85A1 PE=2 SV=1	Q	Secondary metabolites biosynthesis, transport and catabolism	PREDICTED: cytochrome P450 85A1 [Daucus carota subsp. sativus]
c79517.graph_c0	218	149	253	417	578	522	11.55	8.55	15.38	26.07	33.56	29.49	0.00015627	1.17489	up	--	--	Cellular Component: intracellular (GO:0005622);; Biological Process: intracellular protein transport (GO:0006886);; Molecular Function: Ran GTPase binding (GO:0008536);;	K14290|0|cic:CICLE_v100187642m|K14290 exportin-1 | (RefSeq) hypothetical protein	[YU]	--	CRM1 C terminal	Protein EXPORTIN 1A OS=Arabidopsis thaliana OX=3702 GN=XPO1 PE=1 SV=1	U	Intracellular trafficking, secretion, and vesicular transport	PREDICTED: protein EXPORTIN 1A [Daucus carota subsp. sativus]
c88367.graph_c0	901	822	763	386	499	313	23.63	22.77	22.76	11.7	13.98	8.61	2.42325e-05	-1.13002	down	--	--	Cellular Component: cytoplasm (GO:0005737);; Molecular Function: S-adenosylmethionine-dependent methyltransferase activity (GO:0008757);; Cellular Component: membrane (GO:0016020);; Biological Process: methylation (GO:0032259);;	--	--	--	Methyltransferase domain	--	S	Function unknown	PREDICTED: uncharacterized protein LOC108225850 [Daucus carota subsp. sativus]
c71244.graph_c0	202	413	178	52	37	67	29.53	65.01	29.83	9.13	6.09	10.64	3.36803e-05	-2.2347	down	--	--	--	--	--	--	cAMP-regulated phosphoprotein/endosulfine conserved region	--	S	Function unknown	PREDICTED: uncharacterized protein LOC108205205 isoform X2 [Daucus carota subsp. sativus]
c83092.graph_c0	37	38	104	144	304	276	2.47	2.15	9.13	12.72	25.25	21.79	0.00321105	1.73836	up	--	--	Cellular Component: integral component of membrane (GO:0016021);;	--	--	--	--	--	S	Function unknown	PREDICTED: uncharacterized protein LOC108194512 [Daucus carota subsp. sativus]
c82178.graph_c0	97	98	80	28	17	22	3.88	4.16	3.22	2.11	0.68	1	0.000131446	-1.95174	down	--	--	--	--	--	--	--	Protein CHUP1, chloroplastic OS=Arabidopsis thaliana OX=3702 GN=CHUP1 PE=1 SV=1	S	Function unknown	PREDICTED: protein CHUP1, chloroplastic isoform X2 [Daucus carota subsp. sativus]
c79963.graph_c0	215	788	485	38	14	33	13.2	52.08	34.17	2.76	0.94	2.22	9.25691e-11	-3.71895	down	--	--	--	--	--	--	--	--	--	--	PREDICTED: extensin-like [Daucus carota subsp. sativus]
c91746.graph_c0	602	1036	600	208	244	236	13.43	24.13	15.22	5.46	6.15	5.76	5.03121e-06	-1.74116	down	[S]	Function unknown	Molecular Function: phosphatidylinositol phosphate kinase activity (GO:0016307);; Biological Process: phosphatidylinositol metabolic process (GO:0046488);;	K00889|0|sind:105169146|K00889 1-phosphatidylinositol-4-phosphate 5-kinase [EC:2.7.1.68] | (RefSeq) phosphatidylinositol 4-phosphate 5-kinase 8-like	[T]	Signal transduction mechanisms	Phosphatidylinositol-4-phosphate 5-Kinase;; MORN repeat	Phosphatidylinositol 4-phosphate 5-kinase 8 OS=Arabidopsis thaliana OX=3702 GN=PIP5K8 PE=1 SV=1	T	Signal transduction mechanisms	PREDICTED: phosphatidylinositol 4-phosphate 5-kinase 7-like isoform X1 [Daucus carota subsp. sativus]
c85864.graph_c1	826	379	939	1075	2477	3613	23.07	11.61	30.73	36.76	77.98	114.54	0.00449935	1.54525	up	--	--	Cellular Component: integral component of membrane (GO:0016021);;	--	--	--	Protein of unknown function (DUF3339)	--	S	Function unknown	PREDICTED: uncharacterized protein LOC108196005 [Daucus carota subsp. sativus]
c87960.graph_c0	115	48	94	21	32	32	4.15	2.17	4.21	1.11	1.43	1.43	0.00878116	-1.52689	down	--	--	Molecular Function: phospholipase D activity (GO:0004630);; Molecular Function: calcium ion binding (GO:0005509);; Cellular Component: plasma membrane (GO:0005886);; Biological Process: response to osmotic stress (GO:0006970);; Biological Process: cellular response to nitrogen starvation (GO:0006995);; Biological Process: phospholipid catabolic process (GO:0009395);; Biological Process: post-embr…	K01115|2.43122e-55|tcc:TCM_029016|K01115 phospholipase D1/2 [EC:3.1.4.4] | (RefSeq) Phospholipase D alpha 4	[I]	Lipid transport and metabolism	--	Phospholipase D alpha 4 OS=Arabidopsis thaliana OX=3702 GN=PLDALPHA4 PE=2 SV=1	I	Lipid transport and metabolism	Phospholipase D alpha 4 [Theobroma cacao]
c90048.graph_c0	879	954	646	372	108	234	20.65	23.55	16.9	10.45	2.59	5.61	0.00242195	-1.69279	down	--	--	--	--	--	--	--	--	S	Function unknown	hypothetical protein DCAR_027600 [Daucus carota subsp. sativus]
c86539.graph_c0	128	257	164	38	47	27	4.2	9.01	6.12	1.46	1.67	0.97	5.19079e-06	-2.24164	down	--	--	Biological Process: response to salt stress (GO:0009651);; Biological Process: multidimensional cell growth (GO:0009825);; Cellular Component: external side of plasma membrane (GO:0009897);; Cellular Component: integral component of membrane (GO:0016021);; Cellular Component: anchored component of plasma membrane (GO:0046658);;	--	--	--	Fasciclin domain	Fasciclin-like arabinogalactan protein 4 OS=Arabidopsis thaliana OX=3702 GN=FLA4 PE=1 SV=1	S	Function unknown	PREDICTED: fasciclin-like arabinogalactan protein 4 [Daucus carota subsp. sativus]
c88052.graph_c0	46	305	136	35	12	28	1.6	11.47	5.44	1.45	0.46	1.04	0.00346247	-2.30472	down	--	--	Molecular Function: aspartic-type endopeptidase activity (GO:0004190);; Biological Process: proteolysis (GO:0006508);; Biological Process: protein catabolic process (GO:0030163);;	--	[O]	Posttranslational modification, protein turnover, chaperones	Xylanase inhibitor C-terminal;; Eukaryotic aspartyl protease;; Xylanase inhibitor N-terminal;; Eukaryotic aspartyl protease	Aspartyl protease family protein 2 OS=Arabidopsis thaliana OX=3702 GN=APF2 PE=2 SV=1	O	Posttranslational modification, protein turnover, chaperones	PREDICTED: aspartyl protease family protein 2 [Daucus carota subsp. sativus]
c89945.graph_c0	3882	3787	3987	1156	318	702	57.6	60.01	67.36	20.95	6.39	12.93	3.47862e-06	-2.27475	down	--	--	--	--	[K]	Transcription	B-box zinc finger;; CCT motif	Zinc finger protein CONSTANS-LIKE 16 OS=Arabidopsis thaliana OX=3702 GN=COL16 PE=1 SV=2	K	Transcription	PREDICTED: zinc finger protein CONSTANS-LIKE 16-like [Daucus carota subsp. sativus]
c82743.graph_c0	135	52	127	251	402	410	7.08	2.85	9.21	16.19	23.61	22.35	0.000387832	1.59687	up	--	--	--	--	--	--	--	Transcription factor bHLH147 OS=Arabidopsis thaliana OX=3702 GN=BHLH147 PE=1 SV=1	K	Transcription	PREDICTED: transcription factor bHLH147-like [Daucus carota subsp. sativus]
c88078.graph_c0	1537	1284	1510	577	295	812	47.93	41.7	54.58	22.78	10.13	27.99	0.00667902	-1.32936	down	[G]	Carbohydrate transport and metabolism	Cellular Component: chloroplast (GO:0009507);; Biological Process: flavonoid biosynthetic process (GO:0009813);; Biological Process: flavonoid glucuronidation (GO:0052696);; Molecular Function: quercetin 3-O-glucosyltransferase activity (GO:0080043);; Molecular Function: quercetin 7-O-glucosyltransferase activity (GO:0080044);;	--	[GC]	--	UDP-glucoronosyl and UDP-glucosyl transferase	Crocetin glucosyltransferase, chloroplastic OS=Gardenia jasminoides OX=114476 GN=UGT75L6 PE=1 SV=1	S	Function unknown	PREDICTED: crocetin glucosyltransferase, chloroplastic-like [Daucus carota subsp. sativus]
c82215.graph_c1	125	93	85	11	30	6	19.02	14.73	14.87	1.89	4.52	0.85	5.26528e-05	-2.48433	down	--	--	--	--	--	--	--	Protein FANTASTIC FOUR 2 OS=Arabidopsis thaliana OX=3702 GN=FAF2 PE=2 SV=1	S	Function unknown	PREDICTED: protein FANTASTIC FOUR 4 [Daucus carota subsp. sativus]
c81832.graph_c0	130	105	89	25	18	24	5.39	4.98	4.23	1.23	0.82	1.07	2.63475e-06	-2.1864	down	--	--	--	--	--	--	--	--	S	Function unknown	PREDICTED: uncharacterized protein LOC108202754 [Daucus carota subsp. sativus]
c84829.graph_c0	3635	2879	2273	197	77	135	124.29	106.03	89.84	8.25	2.91	5.2	5.1302e-27	-4.20856	down	--	--	--	--	--	--	--	--	S	Function unknown	PREDICTED: uncharacterized protein LOC108220128 [Daucus carota subsp. sativus]
c84828.graph_c1	463	348	505	971	940	1208	32.19	25.94	38.56	77.35	64.46	81.66	9.15592e-05	1.14721	up	[T]	Signal transduction mechanisms	Molecular Function: protein serine/threonine kinase activity (GO:0004674);; Molecular Function: ATP binding (GO:0005524);; Biological Process: protein phosphorylation (GO:0006468);; Cellular Component: integral component of membrane (GO:0016021);; Biological Process: recognition of pollen (GO:0048544);;	--	--	--	Protein tyrosine kinase;; Protein kinase domain;; Domain of unknown function (DUF3403)	G-type lectin S-receptor-like serine/threonine-protein kinase At4g27290 OS=Arabidopsis thaliana OX=3702 GN=At4g27290 PE=3 SV=4	T	Signal transduction mechanisms	PREDICTED: G-type lectin S-receptor-like serine/threonine-protein kinase At4g27290 [Daucus carota subsp. sativus]
c82908.graph_c0	76	164	150	22	13	5	10.72	24.87	24.31	3.71	2.05	0.76	3.5563e-06	-2.92917	down	--	--	--	K01246|3.8109e-34|sly:101246304|K01246 DNA-3-methyladenine glycosylase I [EC:3.2.2.20] | (RefSeq) uncharacterized LOC101246304	--	--	--	--	L	Replication, recombination and repair	PREDICTED: uncharacterized protein LOC108205416 [Daucus carota subsp. sativus]
c85611.graph_c0	19531	15637	8527	5897	2261	5479	816.95	702.34	411.01	289.76	103.97	243.01	0.00294458	-1.5948	down	[M]	Cell wall/membrane/envelope biogenesis	Molecular Function: transferase activity, transferring glycosyl groups (GO:0016757);;	K18819|8.08041e-133|nnu:104607072|K18819 inositol 3-alpha-galactosyltransferase [EC:2.4.1.123] | (RefSeq) galactinol synthase 2-like	[G]	Carbohydrate transport and metabolism	Glycosyl transferase family 8	Galactinol synthase 1 OS=Arabidopsis thaliana OX=3702 GN=GOLS1 PE=1 SV=1	O	Posttranslational modification, protein turnover, chaperones	PREDICTED: galactinol synthase 2-like [Daucus carota subsp. sativus]
c90152.graph_c0	476	537	343	150	79	128	13.38	15.87	10.68	4.76	2.32	3.67	1.43216e-05	-1.88314	down	--	--	--	--	--	--	Protein of unknown function (DUF620)	--	S	Function unknown	PREDICTED: uncharacterized protein LOC108200181 [Daucus carota subsp. sativus]
c81999.graph_c0	44	90	55	7	0	1	1.24	3.67	1.78	0.24	0	0.03	3.77186e-05	-3.37419	down	--	--	--	--	--	--	--	--	L	Replication, recombination and repair	uncharacterized protein LOC110739434 [Chenopodium quinoa]
c71127.graph_c0	93	57	63	13	7	6	7.81	5.15	6.07	1.29	0.65	0.54	3.96936e-06	-2.73106	down	--	--	--	K14488|2.71006e-62|nnu:104589704|K14488 SAUR family protein | (RefSeq) indole-3-acetic acid-induced protein ARG7-like	--	--	Auxin responsive protein	Auxin-responsive protein SAUR50 OS=Arabidopsis thaliana OX=3702 GN=SAUR50 PE=1 SV=1	S	Function unknown	PREDICTED: auxin-responsive protein SAUR40-like [Daucus carota subsp. sativus]
c43078.graph_c0	608	783	524	234	128	125	190.62	263.55	189.21	89.88	46.63	42.76	6.77415e-06	-1.93862	down	[G]	Carbohydrate transport and metabolism	Biological Process: glucose metabolic process (GO:0006006);; Cellular Component: chloroplast (GO:0009507);; Biological Process: reductive pentose-phosphate cycle (GO:0019253);; Molecular Function: glyceraldehyde-3-phosphate dehydrogenase (NADP+) (phosphorylating) activity (GO:0047100);; Molecular Function: NADP binding (GO:0050661);; Molecular Function: NAD binding (GO:0051287);; Biological Proce…	K05298|1.97519e-65|mtr:MTR_7g084800|K05298 glyceraldehyde-3-phosphate dehydrogenase (NADP+) (phosphorylating) [EC:1.2.1.13] | (RefSeq) glyceraldehyde-3-phosphate dehydrogenase	[G]	Carbohydrate transport and metabolism	Glyceraldehyde 3-phosphate dehydrogenase, NAD binding domain	Glyceraldehyde-3-phosphate dehydrogenase A, chloroplastic (Fragment) OS=Nicotiana tabacum OX=4097 GN=GAPA PE=2 SV=1	G	Carbohydrate transport and metabolism	PREDICTED: glyceraldehyde-3-phosphate dehydrogenase A, chloroplastic [Daucus carota subsp. sativus]
c38347.graph_c0	141	87	108	38	36	26	21.28	14.11	18.72	6.86	6.08	4.38	0.000133269	-1.7162	down	--	--	Cellular Component: vacuolar membrane (GO:0005774);; Cellular Component: plasma membrane (GO:0005886);; Biological Process: regulation of hormone levels (GO:0010817);; Cellular Component: integral component of membrane (GO:0016021);; Molecular Function: transmembrane transporter activity (GO:0022857);; Biological Process: positive regulation of cellular metabolic process (GO:0031325);; Biological…	--	--	--	--	Protein WALLS ARE THIN 1 OS=Arabidopsis thaliana OX=3702 GN=WAT1 PE=1 SV=1	S	Function unknown	PREDICTED: protein WALLS ARE THIN 1-like [Daucus carota subsp. sativus]
c87990.graph_c0	507	530	405	124	65	73	14.71	16.54	13.49	4.24	2.05	2.25	2.11049e-09	-2.39606	down	--	--	Molecular Function: zinc ion binding (GO:0008270);;	--	[R]	General function prediction only	PPR repeat family;; PPR repeat;; PPR repeat;; Pentatricopeptide repeat domain;; DYW family of nucleic acid deaminases;; PPR repeat;; PPR repeat family;; PPR repeat;; Pentatricopeptide repeat domain	Pentatricopeptide repeat-containing protein At5g48910 OS=Arabidopsis thaliana OX=3702 GN=PCMP-H38 PE=2 SV=1	S	Function unknown	PREDICTED: pentatricopeptide repeat-containing protein At5g66520-like [Daucus carota subsp. sativus]
c81316.graph_c0	111	199	195	43	21	27	5.17	9.64	10.32	2.5	1.11	1.36	1.07101e-05	-2.33108	down	[G]	Carbohydrate transport and metabolism	Molecular Function: zinc ion binding (GO:0008270);; Molecular Function: mannitol dehydrogenase activity (GO:0046029);; Biological Process: oxidation-reduction process (GO:0055114);;	K00083|4.39543e-107|sind:105165982|K00083 cinnamyl-alcohol dehydrogenase [EC:1.1.1.195] | (RefSeq) probable cinnamyl alcohol dehydrogenase 6	[Q]	Secondary metabolites biosynthesis, transport and catabolism	Zinc-binding dehydrogenase;; Zinc-binding dehydrogenase;; D-isomer specific 2-hydroxyacid dehydrogenase, NAD binding domain	Probable cinnamyl alcohol dehydrogenase 6 OS=Oryza sativa subsp. japonica OX=39947 GN=CAD6 PE=2 SV=2	C	Energy production and conversion	PREDICTED: probable cinnamyl alcohol dehydrogenase 6 isoform X2 [Daucus carota subsp. sativus]
c82568.graph_c0	1061	1336	735	505	453	489	78.01	105.85	61.07	42.98	36.17	38.29	0.00303203	-1.16434	down	--	--	--	--	--	--	--	--	--	--	PREDICTED: uncharacterized protein LOC108196421 [Daucus carota subsp. sativus]
c82380.graph_c1	600	476	512	1089	1496	1319	19.93	17.79	19.74	45.64	56.47	48.66	8.95744e-09	1.1908	up	--	--	Cellular Component: proteasome regulatory particle, base subcomplex (GO:0008540);; Biological Process: proteasome regulatory particle assembly (GO:0070682);;	K06692|0|vvi:100260719|K06692 26S proteasome non-ATPase regulatory subunit 5 | (RefSeq) uncharacterized LOC100260719	[O]	Posttranslational modification, protein turnover, chaperones	Proteasome non-ATPase 26S subunit	--	O	Posttranslational modification, protein turnover, chaperones	PREDICTED: uncharacterized protein LOC108223819 [Daucus carota subsp. sativus]
c82719.graph_c0	1970	2563	1671	999	652	744	20.3	28.5	19.59	11.75	7.01	8.01	0.000266418	-1.39861	down	--	--	Cellular Component: membrane (GO:0016020);;	--	--	--	zinc-binding in reverse transcriptase	--	S	Function unknown	PREDICTED: uncharacterized protein LOC108226457 [Daucus carota subsp. sativus]
c55362.graph_c0	181	200	89	10	7	11	18.4	21.87	10.39	1.21	0.79	1.2	3.06814e-12	-3.71778	down	[E]	Amino acid transport and metabolism	Cellular Component: chloroplast (GO:0009507);;	--	--	--	Stress responsive A/B Barrel Domain	Stress-response A/B barrel domain-containing protein At5g22580 OS=Arabidopsis thaliana OX=3702 GN=At5g22580 PE=1 SV=1	S	Function unknown	PREDICTED: stress-response A/B barrel domain-containing protein At5g22580 [Daucus carota subsp. sativus]
c90186.graph_c0	2770	5236	3026	1681	1176	1127	72.8	147.95	91.83	50.72	32.98	29.95	0.000714667	-1.49136	down	[R]	General function prediction only	--	--	[G]	Carbohydrate transport and metabolism	NAD(P)H-binding;; NmrA-like family;; NAD dependent epimerase/dehydratase family;; 3-beta hydroxysteroid dehydrogenase/isomerase family;; Polysaccharide biosynthesis protein	Protein TIC 62, chloroplastic OS=Arabidopsis thaliana OX=3702 GN=TIC62 PE=1 SV=1	GM	--	PREDICTED: protein TIC 62, chloroplastic [Daucus carota subsp. sativus]
c83723.graph_c0	825	758	457	140	61	80	20.36	19.95	12.82	4.2	1.53	2.09	1.28723e-09	-2.72039	down	[G]	Carbohydrate transport and metabolism	Molecular Function: beta-galactosidase activity (GO:0004565);; Cellular Component: cell wall (GO:0005618);; Cellular Component: vacuole (GO:0005773);; Biological Process: carbohydrate metabolic process (GO:0005975);; Molecular Function: carbohydrate binding (GO:0030246);;	--	[G]	Carbohydrate transport and metabolism	Glycosyl hydrolases family 35;; Galactose binding lectin domain;; Glycosyl hydrolases family 35;; Beta-galactosidase	Beta-galactosidase 3 OS=Arabidopsis thaliana OX=3702 GN=BGAL3 PE=2 SV=1	G	Carbohydrate transport and metabolism	PREDICTED: beta-galactosidase 3-like [Daucus carota subsp. sativus]
c89836.graph_c0	1159	628	1192	1871	2715	2268	53.7	32.15	64.09	121.05	155.85	134.14	0.000644912	1.09345	up	[M]	Cell wall/membrane/envelope biogenesis	--	--	[T]	Signal transduction mechanisms	Protein tyrosine kinase;; Protein kinase domain;; Protein tyrosine kinase	Serine/threonine-protein kinase HT1 OS=Arabidopsis thaliana OX=3702 GN=HT1 PE=1 SV=1	T	Signal transduction mechanisms	PREDICTED: serine/threonine-protein kinase HT1-like [Daucus carota subsp. sativus]
c89225.graph_c1	884	1519	769	298	111	166	33.05	61.11	32.97	13.13	4.52	6.61	5.46829e-06	-2.3318	down	[O]	Posttranslational modification, protein turnover, chaperones	Biological Process: protein peptidyl-prolyl isomerization (GO:0000413);; Molecular Function: peptidyl-prolyl cis-trans isomerase activity (GO:0003755);; Biological Process: protein folding (GO:0006457);;	K03768|6.16174e-119|gmx:100800469|K03768 peptidyl-prolyl cis-trans isomerase B (cyclophilin B) [EC:5.2.1.8] | (RefSeq) peptidyl-prolyl cis-trans isomerase CYP26-2, chloroplastic-like	[O]	Posttranslational modification, protein turnover, chaperones	Cyclophilin type peptidyl-prolyl cis-trans isomerase/CLD	Peptidyl-prolyl cis-trans isomerase CYP26-2, chloroplastic OS=Arabidopsis thaliana OX=3702 GN=CYP26-2 PE=2 SV=1	O	Posttranslational modification, protein turnover, chaperones	PREDICTED: peptidyl-prolyl cis-trans isomerase CYP26-2, chloroplastic [Daucus carota subsp. sativus]
c91214.graph_c0	667	485	490	147	171	204	13.24	10.36	11.15	3.43	3.7	4.31	2.38604e-09	-1.68668	down	[T]	Signal transduction mechanisms	Molecular Function: ATP binding (GO:0005524);; Biological Process: suberin biosynthetic process (GO:0010345);; Cellular Component: integral component of membrane (GO:0016021);; Molecular Function: ATPase activity (GO:0016887);;	--	[Q]	Secondary metabolites biosynthesis, transport and catabolism	ABC-2 type transporter;; ABC transporter	ABC transporter G family member 1 OS=Arabidopsis thaliana OX=3702 GN=ABCG1 PE=2 SV=1	V	Defense mechanisms	PREDICTED: ABC transporter G family member 1-like [Daucus carota subsp. sativus]
c55291.graph_c0	44	39	35	9	3	6	13.44	12.78	12.31	3.36	1.06	2	0.00173539	-2.31775	down	--	--	--	--	--	--	--	Ethylene-responsive transcription factor ERF061 OS=Arabidopsis thaliana OX=3702 GN=ERF061 PE=2 SV=1	K	Transcription	PREDICTED: ethylene-responsive transcription factor ERF061-like [Daucus carota subsp. sativus]
c91419.graph_c0	3237	3434	3659	5708	9419	8478	208.22	238.83	269.55	432.18	661.18	580.23	7.02965e-05	1.06349	up	--	--	--	--	--	--	Reverse transcriptase-like;; Ataxin-2 C-terminal region	Protein EARLY RESPONSIVE TO DEHYDRATION 15 OS=Arabidopsis thaliana OX=3702 GN=ERD15 PE=1 SV=1	S	Function unknown	PREDICTED: protein EARLY RESPONSIVE TO DEHYDRATION 15-like [Daucus carota subsp. sativus]
c92777.graph_c0	640	551	487	303	206	178	14.91	13.91	13.66	9.69	7.57	4.97	0.000565236	-1.30632	down	[K]	Transcription	--	--	[T]	Signal transduction mechanisms	NB-ARC domain	Putative disease resistance RPP13-like protein 3 OS=Arabidopsis thaliana OX=3702 GN=RPP13L3 PE=3 SV=1	S	Function unknown	PREDICTED: disease resistance protein RPP13-like [Daucus carota subsp. sativus]
c55517.graph_c0	381	5822	2798	76	17	110	26.19	430.52	220.7	6.18	1.28	8.07	0.000606713	-3.27903	down	--	--	Cellular Component: membrane (GO:0016020);;	--	--	--	Hydrophobic seed protein;; Protease inhibitor/seed storage/LTP family	14 kDa proline-rich protein DC2.15 OS=Daucus carota OX=4039 PE=2 SV=1	S	Function unknown	PREDICTED: 14 kDa proline-rich protein DC2.15-like [Daucus carota subsp. sativus]
c89847.graph_c0	498	543	358	131	95	140	14.46	17.74	11.56	4.43	2.81	5.8	3.06341e-07	-1.92553	down	[QR]	Secondary metabolites biosynthesis, transport and catabolism ;; General function prediction only	--	--	--	--	Filament-like plant protein, long coiled-coil;; N-terminal domain of oxidoreductase;; Zinc-binding dehydrogenase;; Zinc-binding dehydrogenase	Filament-like plant protein 4 OS=Arabidopsis thaliana OX=3702 GN=FPP4 PE=1 SV=1	S	Function unknown	PREDICTED: filament-like plant protein 6 isoform X2 [Daucus carota subsp. sativus]
c73787.graph_c0	85	48	105	346	448	435	5.92	3.44	8.82	30.18	33.67	35.6	2.52269e-10	2.20171	up	--	--	Cellular Component: membrane (GO:0016020);;	--	--	--	--	Uncharacterized protein At5g65660 OS=Arabidopsis thaliana OX=3702 GN=At5g65660 PE=2 SV=1	S	Function unknown	PREDICTED: uncharacterized protein At5g65660-like [Daucus carota subsp. sativus]
c87219.graph_c0	710	1147	941	1497	6613	2614	22.59	39.04	34.48	56.1	230.09	92.57	0.00325754	1.62482	up	[QV]	Secondary metabolites biosynthesis, transport and catabolism ;; Defense mechanisms	Molecular Function: iron ion binding (GO:0005506);; Molecular Function: trans-cinnamate 4-monooxygenase activity (GO:0016710);; Molecular Function: heme binding (GO:0020037);; Biological Process: oxidation-reduction process (GO:0055114);;	K00487|0|nnu:104593756|K00487 trans-cinnamate 4-monooxygenase [EC:1.14.13.11] | (RefSeq) trans-cinnamate 4-monooxygenase	[Q]	Secondary metabolites biosynthesis, transport and catabolism	Cytochrome P450;; Cytochrome P450	Trans-cinnamate 4-monooxygenase OS=Petroselinum crispum OX=4043 GN=CYP73A10 PE=2 SV=1	Q	Secondary metabolites biosynthesis, transport and catabolism	PREDICTED: trans-cinnamate 4-monooxygenase [Daucus carota subsp. sativus]
c83417.graph_c0	868	1699	820	421	177	448	34.39	74.01	37.33	19.29	7.45	19.11	0.00484336	-1.6289	down	--	--	--	--	--	--	Domain of unknown function (DUF4228)	--	S	Function unknown	PREDICTED: uncharacterized protein LOC108194276 [Daucus carota subsp. sativus]
c79650.graph_c0	1695	1694	1738	881	804	845	90.88	100.93	115.31	59.53	46.13	45.02	5.1948e-06	-1.08376	down	--	--	Molecular Function: protein phosphatase inhibitor activity (GO:0004864);; Molecular Function: receptor activity (GO:0004872);; Cellular Component: nucleus (GO:0005634);; Cellular Component: cytoplasm (GO:0005737);; Biological Process: abscisic acid-activated signaling pathway (GO:0009738);; Molecular Function: abscisic acid binding (GO:0010427);; Biological Process: regulation of protein serine/t…	K14496|1.45238e-87|sly:101245105|K14496 abscisic acid receptor PYR/PYL family | (RefSeq) regulatory component of ABA receptor3-like	--	--	Polyketide cyclase / dehydrase and lipid transport	Abscisic acid receptor PYL9 OS=Arabidopsis thaliana OX=3702 GN=PYL9 PE=1 SV=1	S	Function unknown	PREDICTED: abscisic acid receptor PYL9-like [Daucus carota subsp. sativus]
c86147.graph_c0	32	18	51	76	295	145	1.23	0.74	2.24	3.44	12.38	5.94	0.00193132	1.97957	up	--	--	Molecular Function: transferase activity, transferring acyl groups other than amino-acyl groups (GO:0016747);;	--	--	--	Transferase family	BAHD acyltransferase DCR OS=Arabidopsis thaliana OX=3702 GN=DCR PE=2 SV=1	S	Function unknown	PREDICTED: uncharacterized acetyltransferase At3g50280 [Daucus carota subsp. sativus]
c81587.graph_c0	169	147	123	43	51	35	9.78	8.74	7.65	2.84	2.63	1.96	4.96555e-06	-1.7759	down	[E]	Amino acid transport and metabolism	Cellular Component: integral component of membrane (GO:0016021);;	--	[S]	Function unknown	Ndr family	Protein NDL1 OS=Arabidopsis thaliana OX=3702 GN=NDL1 PE=1 SV=1	S	Function unknown	PREDICTED: pollen-specific protein SF21-like isoform X1 [Daucus carota subsp. sativus]
c61443.graph_c0	4286	4886	3365	1330	792	1238	755.86	925.65	681.96	281.76	157.22	235.33	1.93922e-07	-1.89131	down	--	--	--	--	--	--	--	Late embryogenesis abundant protein Dc3 OS=Daucus carota OX=4039 PE=2 SV=1	S	Function unknown	hypothetical protein DCAR_019219 [Daucus carota subsp. sativus]
c79200.graph_c0	421	517	240	63	6	45	34.23	45.83	22.67	6.16	0.54	3.87	3.14814e-05	-2.86836	down	--	--	--	--	[A]	RNA processing and modification	RING-variant domain	--	O	Posttranslational modification, protein turnover, chaperones	PREDICTED: uncharacterized protein LOC108222359 [Daucus carota subsp. sativus]
c87085.graph_c0	199	222	172	71	44	34	6.73	8.11	7.13	3.28	1.8	1.43	2.81989e-05	-1.94006	down	--	--	Molecular Function: inositol-polyphosphate 5-phosphatase activity (GO:0004445);; Biological Process: phosphatidylinositol dephosphorylation (GO:0046856);; Molecular Function: inositol-1,4,5-trisphosphate 5-phosphatase activity (GO:0052658);; Molecular Function: inositol-1,3,4,5-tetrakisphosphate 5-phosphatase activity (GO:0052659);;	--	[U]	Intracellular trafficking, secretion, and vesicular transport	Endonuclease/Exonuclease/phosphatase family	Type I inositol polyphosphate 5-phosphatase 4 OS=Arabidopsis thaliana OX=3702 GN=IP5P4 PE=2 SV=1	T	Signal transduction mechanisms	PREDICTED: type I inositol polyphosphate 5-phosphatase 4 [Daucus carota subsp. sativus]
c91247.graph_c0	481	613	307	230	141	160	13.62	19.76	11.63	8.09	5.36	5.62	0.00428336	-1.39575	down	[IQ]	Lipid transport and metabolism ;; Secondary metabolites biosynthesis, transport and catabolism	--	K14760|4.20266e-101|sot:102599176|K14760 acyl-activating enzyme 14 [EC:6.2.1.26] | (RefSeq) 2-succinylbenzoate--CoA ligase, chloroplastic/peroxisomal	[I]	Lipid transport and metabolism	AMP-binding enzyme;; AMP-binding enzyme C-terminal domain;; PIF1-like helicase;; PIF1-like helicase;; PIF1-like helicase;; AMP-binding enzyme	2-succinylbenzoate--CoA ligase, chloroplastic/peroxisomal OS=Arabidopsis thaliana OX=3702 GN=AAE14 PE=1 SV=1	IQ	--	PREDICTED: 2-succinylbenzoate--CoA ligase, chloroplastic/peroxisomal-like isoform X2 [Daucus carota subsp. sativus]
c65855.graph_c0	445	447	371	175	187	124	23.91	25.82	22.83	11.01	11.02	7.09	5.36598e-06	-1.43134	down	--	--	Biological Process: flavonoid metabolic process (GO:0009812);; Molecular Function: UDP-glucosyltransferase activity (GO:0035251);;	--	[GC]	--	UDP-glucoronosyl and UDP-glucosyl transferase	7-deoxyloganetic acid glucosyltransferase OS=Catharanthus roseus OX=4058 GN=UGT709C2 PE=1 SV=1	S	Function unknown	PREDICTED: 7-deoxyloganetic acid glucosyltransferase-like [Daucus carota subsp. sativus]
c89588.graph_c0	362	454	298	1023	2539	1127	6.05	8.17	5.72	20.07	46.88	20.06	9.04531e-06	1.82792	up	[G]	Carbohydrate transport and metabolism	Biological Process: glycogen catabolic process (GO:0005980);; Molecular Function: glycogen phosphorylase activity (GO:0008184);; Biological Process: response to water deprivation (GO:0009414);; Cellular Component: amyloplast (GO:0009501);; Cellular Component: chloroplast stroma (GO:0009570);; Molecular Function: pyridoxal phosphate binding (GO:0030170);; Molecular Function: identical protein bind…	K00688|0|pxb:103951000|K00688 glycogen phosphorylase [EC:2.4.1.1] | (RefSeq) alpha-1,4 glucan phosphorylase L isozyme, chloroplastic/amyloplastic-like	[G]	Carbohydrate transport and metabolism	Carbohydrate phosphorylase	Alpha-1,4 glucan phosphorylase L isozyme, chloroplastic/amyloplastic OS=Ipomoea batatas OX=4120 PE=2 SV=1	G	Carbohydrate transport and metabolism	PREDICTED: alpha-1,4 glucan phosphorylase L isozyme, chloroplastic/amyloplastic [Daucus carota subsp. sativus]
c85466.graph_c0	191	222	112	63	57	63	10.96	12.93	7.58	4.61	4.8	4.46	0.00184878	-1.51543	down	--	--	Molecular Function: DNA binding (GO:0003677);; Molecular Function: transcription factor activity, sequence-specific DNA binding (GO:0003700);; Cellular Component: nucleus (GO:0005634);; Biological Process: regulation of transcription, DNA-templated (GO:0006355);;	K09286|2.25355e-69|tcc:TCM_037194|K09286 EREBP-like factor | (RefSeq) Integrase-type DNA-binding superfamily protein	--	--	AP2 domain	Dehydration-responsive element-binding protein 3 OS=Arabidopsis thaliana OX=3702 GN=DREB3 PE=2 SV=1	K	Transcription	PREDICTED: dehydration-responsive element-binding protein 3-like [Daucus carota subsp. sativus]
c84601.graph_c0	1439	1774	1030	504	152	340	49.94	66.86	41.52	20.26	5.78	12.08	0.000215202	-1.97078	down	[P]	Inorganic ion transport and metabolism	Cellular Component: integral component of plasma membrane (GO:0005887);; Molecular Function: ammonium transmembrane transporter activity (GO:0008519);; Biological Process: organic cation transport (GO:0015695);; Biological Process: nitrogen utilization (GO:0019740);; Biological Process: ammonium transmembrane transport (GO:0072488);;	K03320|0|egr:104422394|K03320 ammonium transporter, Amt family | (RefSeq) ammonium transporter 1 member 3	[P]	Inorganic ion transport and metabolism	Ammonium Transporter Family	Ammonium transporter 1 member 3 OS=Solanum lycopersicum OX=4081 GN=AMT1-3 PE=2 SV=1	P	Inorganic ion transport and metabolism	PREDICTED: ammonium transporter 1 member 3-like [Daucus carota subsp. sativus]
c83061.graph_c0	1193	616	694	467	321	306	113.09	64.05	77.7	57.49	36.33	33.71	0.00452008	-1.18847	down	--	--	Biological Process: transcription, DNA-templated (GO:0006351);;	K09284|3.48529e-50|vvi:100268051|K09284 AP2-like factor, euAP2 lineage | (RefSeq) AP2; transcription factor APETALA2	--	--	--	Floral homeotic protein APETALA 2 OS=Arabidopsis thaliana OX=3702 GN=AP2 PE=1 SV=1	K	Transcription	PREDICTED: floral homeotic protein APETALA 2-like [Daucus carota subsp. sativus]
c86638.graph_c0	164	142	111	11	42	16	5.22	4.9	3.71	0.46	1.33	0.57	5.7344e-06	-2.47385	down	--	--	Cellular Component: integral component of membrane (GO:0016021);; Biological Process: transmembrane transport (GO:0055085);;	--	[C]	Energy production and conversion	Mitochondrial carrier protein	Probable mitochondrial adenine nucleotide transporter BTL3 OS=Arabidopsis thaliana OX=3702 GN=At5g64970 PE=2 SV=1	S	Function unknown	PREDICTED: probable mitochondrial adenine nucleotide transporter BTL3 [Daucus carota subsp. sativus]
c73180.graph_c0	1078	2456	1197	470	630	439	72.35	177.21	92.1	37.45	46.58	31.54	0.000261273	-1.66059	down	[J]	Translation, ribosomal structure and biogenesis	Biological Process: cytoplasmic translation (GO:0002181);; Molecular Function: structural constituent of ribosome (GO:0003735);; Cellular Component: ribosome (GO:0005840);; Molecular Function: rRNA binding (GO:0019843);;	K02933|3.53754e-125|tcc:TCM_011338|K02933 large subunit ribosomal protein L6 | (RefSeq) Ribosomal protein L6 family	[J]	Translation, ribosomal structure and biogenesis	Ribosomal protein L6	50S ribosomal protein L6, chloroplastic OS=Arabidopsis thaliana OX=3702 GN=RPL6 PE=2 SV=1	J	Translation, ribosomal structure and biogenesis	PREDICTED: 50S ribosomal protein L6, chloroplastic [Daucus carota subsp. sativus]
c83141.graph_c0	198	104	143	217	812	406	4.81	2.31	3.6	6.81	21.23	10.76	0.00738013	1.45694	up	--	--	--	K09422|1.72485e-110|vra:106778107|K09422 myb proto-oncogene protein, plant | (RefSeq) transcription factor MYB44-like	[K]	Transcription	Myb-like DNA-binding domain;; Myb-like DNA-binding domain	Transcription factor MYB73 OS=Arabidopsis thaliana OX=3702 GN=MYB73 PE=1 SV=1	K	Transcription	PREDICTED: transcription factor MYB44 [Daucus carota subsp. sativus]
c80399.graph_c0	97	96	121	228	345	188	3.05	3.26	4.36	8.44	11.85	6.29	0.00461331	1.12378	up	--	--	Molecular Function: acetylglucosaminyltransferase activity (GO:0008375);; Cellular Component: integral component of membrane (GO:0016021);;	--	--	--	Core-2/I-Branching enzyme	--	S	Function unknown	PREDICTED: uncharacterized protein LOC108224597 [Daucus carota subsp. sativus]
c78949.graph_c0	422	509	352	227	239	206	22.49	29.19	21.54	14.26	13.94	11.71	0.00497396	-1.00262	down	--	--	Cellular Component: membrane (GO:0016020);;	--	--	--	Protein of unknown function (DUF2839)	--	S	Function unknown	PREDICTED: uncharacterized protein LOC108220779 [Daucus carota subsp. sativus]
c79709.graph_c0	148	187	77	19	16	29	7.71	10.47	4.6	1.17	0.91	1.61	8.59061e-06	-2.49966	down	--	--	--	--	--	--	--	--	S	Function unknown	PREDICTED: uncharacterized protein LOC108217402 [Daucus carota subsp. sativus]
c86106.graph_c0	983	1831	907	440	337	387	43.5	87.99	47.58	23.03	16.14	18.17	0.000121813	-1.68619	down	[C]	Energy production and conversion	Molecular Function: electron carrier activity (GO:0009055);; Cellular Component: chloroplast thylakoid membrane (GO:0009535);; Biological Process: photosynthetic electron transport in photosystem I (GO:0009773);; Cellular Component: NAD(P)H dehydrogenase complex (plastoquinone) (GO:0010598);; Molecular Function: metal ion binding (GO:0046872);; Molecular Function: iron-sulfur cluster binding (GO:…	--	--	--	2Fe-2S iron-sulfur cluster binding domain	Photosynthetic NDH subunit of subcomplex B 3, chloroplastic OS=Arabidopsis thaliana OX=3702 GN=PNSB3 PE=2 SV=1	C	Energy production and conversion	PREDICTED: photosynthetic NDH subunit of subcomplex B 3, chloroplastic [Daucus carota subsp. sativus]
c81085.graph_c0	808	1233	836	454	565	455	20.37	33.48	24.19	13.45	15.48	12.2	0.00423801	-1.04738	down	[G]	Carbohydrate transport and metabolism	Cellular Component: chloroplast envelope (GO:0009941);; Cellular Component: integral component of membrane (GO:0016021);; Molecular Function: substrate-specific transmembrane transporter activity (GO:0022891);; Biological Process: transmembrane transport (GO:0055085);;	--	[R]	General function prediction only	Sugar (and other) transporter;; Major Facilitator Superfamily	D-xylose-proton symporter-like 3, chloroplastic OS=Arabidopsis thaliana OX=3702 GN=At5g59250 PE=1 SV=2	G	Carbohydrate transport and metabolism	hypothetical protein DCAR_005944 [Daucus carota subsp. sativus]
c87306.graph_c0	1839	988	1767	3700	5103	3820	53.66	35.89	54.45	142.98	150.47	133.1	2.44143e-06	1.34637	up	[O]	Posttranslational modification, protein turnover, chaperones	Molecular Function: ATP binding (GO:0005524);; Biological Process: protein folding (GO:0006457);; Biological Process: response to stress (GO:0006950);; Molecular Function: unfolded protein binding (GO:0051082);;	K09487|0|gra:105794269|K09487 heat shock protein 90kDa beta | (RefSeq) heat shock protein 83-like	[O]	Posttranslational modification, protein turnover, chaperones	Hsp90 protein;; Histidine kinase-, DNA gyrase B-, and HSP90-like ATPase;; Histidine kinase-, DNA gyrase B-, and HSP90-like ATPase	Heat shock protein 90-5, chloroplastic OS=Arabidopsis thaliana OX=3702 GN=HSP90-5 PE=1 SV=1	O	Posttranslational modification, protein turnover, chaperones	PREDICTED: heat shock protein 90-5, chloroplastic [Daucus carota subsp. sativus]
c85760.graph_c0	119	85	76	37	15	26	7.16	5.54	5.37	2.6	1.06	1.63	0.0048764	-1.71041	down	--	--	--	--	--	--	Protein of unknown function (DUF688)	--	S	Function unknown	PREDICTED: uncharacterized protein LOC108211480 [Daucus carota subsp. sativus]
c77620.graph_c0	20	40	16	0	3	0	0.94	2.02	0.86	0	0.16	0	0.0019156	-2.97361	down	[Q]	Secondary metabolites biosynthesis, transport and catabolism	Biological Process: fatty acid biosynthetic process (GO:0006633);; Cellular Component: integral component of membrane (GO:0016021);; Molecular Function: transferase activity, transferring acyl groups other than amino-acyl groups (GO:0016747);;	K15397|0|rcu:8273206|K15397 3-ketoacyl-CoA synthase [EC:2.3.1.199] | (RefSeq) 3-ketoacyl-CoA synthase 12	--	--	FAE1/Type III polyketide synthase-like protein;; Chalcone and stilbene synthases, C-terminal domain;; 3-Oxoacyl-[acyl-carrier-protein (ACP)] synthase III C terminal	3-ketoacyl-CoA synthase 3 OS=Arabidopsis thaliana OX=3702 GN=KCS3 PE=2 SV=3	Q	Secondary metabolites biosynthesis, transport and catabolism	PREDICTED: 3-ketoacyl-CoA synthase 12-like [Daucus carota subsp. sativus]
c86347.graph_c0	480	242	655	846	1391	1209	18.79	9.87	28.25	39.34	58.86	47.07	0.00823389	1.18493	up	[F]	Nucleotide transport and metabolism	Cellular Component: plasma membrane (GO:0005886);; Cellular Component: plasmodesma (GO:0009506);; Molecular Function: adenine transmembrane transporter activity (GO:0015207);; Molecular Function: guanine transmembrane transporter activity (GO:0015208);; Molecular Function: uracil transmembrane transporter activity (GO:0015210);; Molecular Function: solute:cation symporter activity (GO:0015294);; …	K14611|2.12207e-163|sind:105166219|K14611 solute carrier family 23 (nucleobase transporter), member 1/2 | (RefSeq) nucleobase-ascorbate transporter 3	[F]	Nucleotide transport and metabolism	Permease family;; Permease family	Nucleobase-ascorbate transporter 3 OS=Arabidopsis thaliana OX=3702 GN=NAT3 PE=2 SV=2	F	Nucleotide transport and metabolism	hypothetical protein DCAR_019473 [Daucus carota subsp. sativus]
c76946.graph_c0	977	1643	880	366	121	316	27.6	50.58	28.3	12.22	3.88	9.75	0.000249048	-2.00554	down	--	--	Biological Process: lipid metabolic process (GO:0006629);; Cellular Component: chloroplast envelope (GO:0009941);; Cellular Component: integral component of membrane (GO:0016021);; Molecular Function: oxidoreductase activity, acting on the CH-CH group of donors (GO:0016627);; Biological Process: oxidation-reduction process (GO:0055114);;	K10258|1.04026e-62|sly:101255353|K10258 very-long-chain enoyl-CoA reductase [EC:1.3.1.93] | (RefSeq) very-long-chain enoyl-CoA reductase-like	[I]	Lipid transport and metabolism	3-oxo-5-alpha-steroid 4-dehydrogenase;; Protein of unknown function (DUF1295)	Steroid 5-alpha-reductase DET2 OS=Gossypium hirsutum OX=3635 GN=DET2 PE=1 SV=1	S	Function unknown	PREDICTED: 3-oxo-5-alpha-steroid 4-dehydrogenase 2-like [Daucus carota subsp. sativus]
c68137.graph_c0	549	293	184	34	8	17	53.5	30.7	20.58	3.93	0.86	1.77	3.44921e-10	-3.63275	down	--	--	Cellular Component: cell (GO:0005623);; Molecular Function: electron carrier activity (GO:0009055);; Molecular Function: protein disulfide oxidoreductase activity (GO:0015035);; Cellular Component: integral component of membrane (GO:0016021);; Biological Process: cell redox homeostasis (GO:0045454);; Biological Process: oxidation-reduction process (GO:0055114);;	K03676|3.66007e-47|sind:105171482|K03676 glutaredoxin 3 | (RefSeq) monothiol glutaredoxin-S4-like	[O]	Posttranslational modification, protein turnover, chaperones	Glutaredoxin	Monothiol glutaredoxin-S2 OS=Arabidopsis thaliana OX=3702 GN=GRXS2 PE=3 SV=1	O	Posttranslational modification, protein turnover, chaperones	PREDICTED: monothiol glutaredoxin-S2-like [Daucus carota subsp. sativus]
c77619.graph_c0	2885	3682	2487	1208	946	863	185.66	255.24	184.36	92.93	66.73	59.53	1.07714e-06	-1.62132	down	--	--	Molecular Function: calcium ion binding (GO:0005509);; Cellular Component: photosystem II oxygen evolving complex (GO:0009654);; Biological Process: photosynthesis (GO:0015979);; Cellular Component: extrinsic component of membrane (GO:0019898);;	K08901|4.38198e-62|cmo:103494958|K08901 photosystem II oxygen-evolving enhancer protein 3 | (RefSeq) photosynthetic NDH subunit of lumenal location 3, chloroplastic	--	--	Oxygen evolving enhancer protein 3 (PsbQ)	Photosynthetic NDH subunit of lumenal location 3, chloroplastic OS=Arabidopsis thaliana OX=3702 GN=PNSL3 PE=1 SV=1	S	Function unknown	PREDICTED: photosynthetic NDH subunit of lumenal location 3, chloroplastic [Daucus carota subsp. sativus]
c85027.graph_c0	3207	4238	2796	1494	692	1073	227.77	352.58	232.79	135.04	59.47	93.36	0.000228159	-1.62857	down	--	--	Biological Process: chloroplast organization (GO:0009658);;	--	--	--	--	Protein STAY-GREEN LIKE, chloroplastic OS=Arabidopsis thaliana OX=3702 GN=SGRL PE=2 SV=1	S	Function unknown	PREDICTED: protein STAY-GREEN LIKE, chloroplastic-like [Daucus carota subsp. sativus]
c78286.graph_c3	472	296	529	1248	1464	1688	24.49	17.61	31.87	73.33	83.83	92.9	2.20893e-08	1.64568	up	--	--	Molecular Function: DNA binding (GO:0003677);; Molecular Function: transcription factor activity, sequence-specific DNA binding (GO:0003700);; Cellular Component: nucleus (GO:0005634);; Biological Process: regulation of transcription, DNA-templated (GO:0006355);;	K09286|1.40813e-61|sind:105159140|K09286 EREBP-like factor | (RefSeq) ethylene-responsive transcription factor ERF008-like	--	--	AP2 domain	Ethylene-responsive transcription factor RAP2-1 OS=Arabidopsis thaliana OX=3702 GN=RAP2-1 PE=2 SV=1	K	Transcription	hypothetical protein CDL12_01102 [Handroanthus impetiginosus]
c66861.graph_c0	129	171	103	51	36	40	38.61	54.92	35.49	18.66	12.48	13.04	0.00114968	-1.63754	down	[J]	Translation, ribosomal structure and biogenesis	Molecular Function: translation elongation factor activity (GO:0003746);; Molecular Function: GTPase activity (GO:0003924);; Molecular Function: GTP binding (GO:0005525);; Cellular Component: mitochondrion (GO:0005739);; Cellular Component: chloroplast (GO:0009507);; Biological Process: mitochondrial translational elongation (GO:0070125);;	K02358|2.73272e-45|aip:107629387|K02358 elongation factor Tu | (RefSeq) elongation factor Tu, chloroplastic	[J]	Translation, ribosomal structure and biogenesis	--	Elongation factor Tu, chloroplastic OS=Glycine max OX=3847 GN=TUFB1 PE=3 SV=1	J	Translation, ribosomal structure and biogenesis	PREDICTED: elongation factor TuB, chloroplastic-like [Daucus carota subsp. sativus]
c82909.graph_c0	195	294	211	104	86	106	10.71	17.32	13.26	6.7	5.16	6.21	0.00422456	-1.27319	down	[H]	Coenzyme transport and metabolism	Molecular Function: S-adenosylmethionine-dependent methyltransferase activity (GO:0008757);; Cellular Component: chloroplast (GO:0009507);; Biological Process: methylation (GO:0032259);; Biological Process: phylloquinone biosynthetic process (GO:0042372);; Molecular Function: 2-phytyl-1,4-naphthoquinone methyltransferase activity (GO:0052624);;	K03183|8.77795e-132|gra:105785795|K03183 demethylmenaquinone methyltransferase / 2-methoxy-6-polyprenyl-1,4-benzoquinol methylase [EC:2.1.1.163 2.1.1.201] | (RefSeq) 2-phytyl-1,4-beta-naphthoquinone methyltransferase, chloroplastic	[H]	Coenzyme transport and metabolism	ubiE/COQ5 methyltransferase family;; Methyltransferase domain;; Methyltransferase domain;; Methyltransferase domain;; Methyltransferase domain;; Methyltransferase domain;; Protein-L-isoaspartate(D-aspartate) O-methyltransferase (PCMT)	2-phytyl-1,4-beta-naphthoquinone methyltransferase, chloroplastic OS=Arabidopsis thaliana OX=3702 GN=MENG PE=1 SV=2	H	Coenzyme transport and metabolism	PREDICTED: 2-phytyl-1,4-beta-naphthoquinone methyltransferase, chloroplastic [Daucus carota subsp. sativus]
c91793.graph_c0	233	218	199	70	82	36	3.38	3.38	3.32	1.14	1.26	0.54	1.61769e-05	-1.79369	down	--	--	--	--	--	--	Domain of unknown function (DUF4378)	Protein LONGIFOLIA 1 OS=Arabidopsis thaliana OX=3702 GN=LNG1 PE=1 SV=1	S	Function unknown	PREDICTED: protein LONGIFOLIA 1-like isoform X2 [Daucus carota subsp. sativus]
c88637.graph_c0	1616	735	1263	659	506	572	52.54	25.74	47.1	25.2	17.91	19.79	0.00778823	-1.06133	down	[MDT]	Cell wall/membrane/envelope biogenesis ;; Cell cycle control, cell division, chromosome partitioning ;; Signal transduction mechanisms	Molecular Function: nucleotide binding (GO:0000166);; Cellular Component: membrane (GO:0016020);;	K08900|9.0532e-171|vvi:100255828|K08900 mitochondrial chaperone BCS1 | (RefSeq) AAA-ATPase At2g46620	[O]	Posttranslational modification, protein turnover, chaperones	ATPase family associated with various cellular activities (AAA);; Domain associated at C-terminal with AAA	AAA-ATPase At2g46620 OS=Arabidopsis thaliana OX=3702 GN=At2g46620 PE=2 SV=1	O	Posttranslational modification, protein turnover, chaperones	PREDICTED: AAA-ATPase At2g46620 [Daucus carota subsp. sativus]
c89056.graph_c0	829	750	892	179	278	145	22.85	22.15	28.35	5.83	8.87	4.61	1.4878e-13	-2.08726	down	--	--	Biological Process: cation transport (GO:0006812);;	--	--	--	--	K(+) efflux antiporter 2, chloroplastic OS=Arabidopsis thaliana OX=3702 GN=KEA2 PE=1 SV=2	--	--	PREDICTED: K(+) efflux antiporter 2, chloroplastic [Daucus carota subsp. sativus]
c85358.graph_c1	65	65	45	2	4	1	1.75	1.91	1.39	0.06	0.12	0.03	1.05509e-08	-3.86632	down	--	;;	Molecular Function: protein kinase activity (GO:0004672);; Cellular Component: membrane (GO:0016020);; Biological Process: phosphorylation (GO:0016310);;	--	--	--	Protein kinase domain;; Protein tyrosine kinase;; PAN-like domain;; S-locus glycoprotein domain;; D-mannose binding lectin	G-type lectin S-receptor-like serine/threonine-protein kinase RKS1 OS=Arabidopsis thaliana OX=3702 GN=RKS1 PE=3 SV=3	T	Signal transduction mechanisms	PREDICTED: uncharacterized protein LOC108224124 [Daucus carota subsp. sativus]
c90958.graph_c0	1232	1146	1095	560	412	467	32.7	32.76	33.35	17.49	11.9	13.2	6.58926e-06	-1.31035	down	--	--	--	--	--	--	TCP family transcription factor	Transcription factor TCP7 OS=Arabidopsis thaliana OX=3702 GN=TCP7 PE=1 SV=1	K	Transcription	PREDICTED: transcription factor TCP7 [Daucus carota subsp. sativus]
c79950.graph_c0	11	31	15	1	2	0	0.56	1.7	0.87	0.06	0.11	0	0.00646213	-2.70407	down	[S]	Function unknown	--	--	[S]	Function unknown	DTW domain	--	S	Function unknown	PREDICTED: uncharacterized protein LOC108226498 [Daucus carota subsp. sativus]
c90626.graph_c1	3985	3754	3362	1177	807	1069	144.11	140.53	129.82	52.45	30.91	43.57	9.24792e-11	-1.87848	down	--	--	--	--	--	--	Helix-loop-helix DNA-binding domain	Transcription factor bHLH62 OS=Arabidopsis thaliana OX=3702 GN=BHLH62 PE=2 SV=1	K	Transcription	PREDICTED: transcription factor bHLH62-like [Daucus carota subsp. sativus]
c89720.graph_c0	41	24	31	64	144	113	1.79	1.32	1.63	3.33	7.25	5.77	0.0046439	1.52388	up	[P]	Inorganic ion transport and metabolism	Molecular Function: zinc ion transmembrane transporter activity (GO:0005385);; Biological Process: response to zinc ion (GO:0010043);; Cellular Component: integral component of membrane (GO:0016021);; Biological Process: regulation of sequestering of zinc ion (GO:0061088);; Biological Process: zinc II ion transmembrane transport (GO:0071577);;	--	[P]	Inorganic ion transport and metabolism	Cation efflux family;; Dimerisation domain of Zinc Transporter;; Cation efflux family	Metal tolerance protein 10 OS=Arabidopsis thaliana OX=3702 GN=MTP10 PE=2 SV=1	P	Inorganic ion transport and metabolism	PREDICTED: metal tolerance protein 9 [Daucus carota subsp. sativus]
c64872.graph_c0	771	1025	586	397	358	307	64.43	92.11	55.98	38.49	33.13	27.67	0.00207354	-1.21691	down	--	--	--	--	[U]	Intracellular trafficking, secretion, and vesicular transport	--	--	S	Function unknown	PREDICTED: uncharacterized protein LOC108193677 [Daucus carota subsp. sativus]
c88821.graph_c1	2405	1849	1260	832	451	759	83.61	71.44	51.12	41.03	15.8	33.45	0.00135245	-1.41036	down	[C]	Energy production and conversion	Molecular Function: 3-chloroallyl aldehyde dehydrogenase activity (GO:0004028);; Molecular Function: aldehyde dehydrogenase (NAD) activity (GO:0004029);; Molecular Function: aldehyde dehydrogenase [NAD(P)+] activity (GO:0004030);; Biological Process: cellular aldehyde metabolic process (GO:0006081);; Biological Process: oxidation-reduction process (GO:0055114);;	K00128|9.33182e-125|vvi:100253650|K00128 aldehyde dehydrogenase (NAD+) [EC:1.2.1.3] | (RefSeq) aldehyde dehydrogenase family 3 member F1	[C]	Energy production and conversion	Aldehyde dehydrogenase family;; Aldehyde dehydrogenase family	Aldehyde dehydrogenase family 3 member F1 OS=Arabidopsis thaliana OX=3702 GN=ALDH3F1 PE=2 SV=2	C	Energy production and conversion	PREDICTED: aldehyde dehydrogenase family 3 member F1-like [Daucus carota subsp. sativus]
c80574.graph_c0	127	130	227	532	876	669	5.16	5.61	10.44	25.18	38.82	28.86	4.82836e-08	1.9192	up	[O]	Posttranslational modification, protein turnover, chaperones	Molecular Function: serine-type endopeptidase activity (GO:0004252);; Cellular Component: integral component of membrane (GO:0016021);; Biological Process: protein processing (GO:0016485);;	--	[T]	Signal transduction mechanisms	Rhomboid family	RHOMBOID-like protein 1 OS=Arabidopsis thaliana OX=3702 GN=RBL1 PE=2 SV=1	S	Function unknown	PREDICTED: RHOMBOID-like protein 2 [Daucus carota subsp. sativus]
c91703.graph_c1	572	574	510	1534	2530	2040	7.89	8.51	8.94	28.33	65.13	40.48	9.04344e-13	1.73857	up	[G]	Carbohydrate transport and metabolism	Molecular Function: transcription cofactor activity (GO:0003712);; Molecular Function: histone acetyltransferase activity (GO:0004402);; Cellular Component: nucleus (GO:0005634);; Biological Process: regulation of transcription, DNA-templated (GO:0006355);; Molecular Function: zinc ion binding (GO:0008270);; Biological Process: histone acetylation (GO:0016573);;	--	[K]	Transcription	BTB/POZ domain;; TAZ zinc finger;; Carbohydrate phosphorylase	BTB/POZ and TAZ domain-containing protein 4 OS=Arabidopsis thaliana OX=3702 GN=BT4 PE=1 SV=1	S	Function unknown	PREDICTED: BTB/POZ and TAZ domain-containing protein 4 [Daucus carota subsp. sativus]
c89655.graph_c0	425	317	470	736	1225	876	10.44	8.36	13.2	21.13	32.58	22.8	0.000118733	1.1036	up	--	--	Molecular Function: DNA binding (GO:0003677);;	--	--	--	WRKY DNA -binding domain;; Plant zinc cluster domain	Probable WRKY transcription factor 7 OS=Arabidopsis thaliana OX=3702 GN=WRKY7 PE=1 SV=1	K	Transcription	PREDICTED: probable WRKY transcription factor 15 isoform X2 [Daucus carota subsp. sativus]
c84676.graph_c0	669	847	564	336	374	288	30.32	39.77	28.94	17.49	17.83	13.31	0.000995406	-1.13116	down	[DM]	Cell cycle control, cell division, chromosome partitioning ;; Cell wall/membrane/envelope biogenesis	--	--	--	--	Putative peptidoglycan binding domain	Protein disulfide isomerase pTAC5, chloroplastic OS=Arabidopsis thaliana OX=3702 GN=PTAC5 PE=1 SV=1	S	Function unknown	PREDICTED: uncharacterized protein LOC108197153 isoform X2 [Daucus carota subsp. sativus]
c78619.graph_c0	57	43	85	119	242	173	1.92	1.52	3.12	4.2	6.99	5.18	0.00655116	1.34182	up	--	--	Molecular Function: iron ion transmembrane transporter activity (GO:0005381);; Cellular Component: integral component of membrane (GO:0016021);; Biological Process: iron ion transmembrane transport (GO:0034755);;	K14685|0|sind:105174626|K14685 solute carrier family 40 (iron-regulated transporter), member 1 | (RefSeq) solute carrier family 40 member 2	[P]	Inorganic ion transport and metabolism	Ferroportin1 (FPN1)	Solute carrier family 40 member 2 OS=Arabidopsis thaliana OX=3702 GN=IREG2 PE=2 SV=1	U	Intracellular trafficking, secretion, and vesicular transport	PREDICTED: solute carrier family 40 member 2-like [Daucus carota subsp. sativus]
c87083.graph_c0	121	92	126	269	371	297	3.93	3.25	4.79	9.96	13.24	9.93	3.08467e-06	1.34254	up	[F]	Nucleotide transport and metabolism	Cellular Component: nucleus (GO:0005634);; Biological Process: deoxyribonucleoside monophosphate biosynthetic process (GO:0009157);; Molecular Function: hydrolase activity (GO:0016787);; Molecular Function: deoxynucleoside kinase activity (GO:0019136);;	--	[F]	Nucleotide transport and metabolism	Deoxynucleoside kinase	--	F	Nucleotide transport and metabolism	PREDICTED: uncharacterized protein LOC108204714 [Daucus carota subsp. sativus]
c62774.graph_c0	215	190	177	375	579	492	9.67	9.17	9.1	19.82	28.35	23.55	2.22835e-05	1.18613	up	[C]	Energy production and conversion	Cellular Component: peroxisome (GO:0005777);; Biological Process: carbohydrate metabolic process (GO:0005975);; Biological Process: tricarboxylic acid cycle (GO:0006099);; Biological Process: malate metabolic process (GO:0006108);; Cellular Component: chloroplast (GO:0009507);; Molecular Function: L-malate dehydrogenase activity (GO:0030060);; Biological Process: regulation of fatty acid beta-oxi…	K00026|0|sind:105177859|K00026 malate dehydrogenase [EC:1.1.1.37] | (RefSeq) malate dehydrogenase, glyoxysomal	[C]	Energy production and conversion	lactate/malate dehydrogenase, alpha/beta C-terminal domain;; lactate/malate dehydrogenase, NAD binding domain;; 3-beta hydroxysteroid dehydrogenase/isomerase family	Malate dehydrogenase 1, peroxisomal OS=Arabidopsis thaliana OX=3702 GN=PMDH1 PE=1 SV=1	C	Energy production and conversion	PREDICTED: probable malate dehydrogenase, glyoxysomal [Daucus carota subsp. sativus]
c78113.graph_c0	70	99	77	155	256	309	3.51	5.41	3.88	9.09	13.22	16	0.00401374	1.35837	up	--	--	--	--	--	--	VQ motif	VQ motif-containing protein 4 OS=Arabidopsis thaliana OX=3702 GN=VQ4 PE=1 SV=1	S	Function unknown	PREDICTED: VQ motif-containing protein 4 [Daucus carota subsp. sativus]
c85553.graph_c0	1707	1766	1153	710	422	503	48.9	51.2	44.79	37.05	26.79	25.36	0.000128253	-1.50372	down	--	--	--	--	--	--	Pathogenesis-related protein Bet v I family;; Pathogenesis-related protein Bet v I family	S-norcoclaurine synthase 2 OS=Papaver somniferum OX=3469 GN=NCS2 PE=1 SV=1	S	Function unknown	PREDICTED: S-norcoclaurine synthase 2-like [Daucus carota subsp. sativus]
c91434.graph_c0	161	200	137	30	11	19	3.18	4.25	3.1	0.7	0.26	0.4	4.66184e-08	-2.83909	down	--	--	--	--	--	--	Filament-like plant protein, long coiled-coil	Filament-like plant protein 7 OS=Arabidopsis thaliana OX=3702 GN=FPP7 PE=3 SV=2	S	Function unknown	PREDICTED: filament-like plant protein 7 [Daucus carota subsp. sativus]
c85541.graph_c0	95	127	179	159	1034	822	5.34	7.77	11.52	10.52	63.85	49.46	0.00275279	1.93769	up	--	--	--	--	--	--	PDDEXK-like family of unknown function;; PDDEXK-like family of unknown function	--	S	Function unknown	PREDICTED: uncharacterized protein LOC108196471 [Daucus carota subsp. sativus]
c81477.graph_c0	2126	2650	1770	1201	673	1021	89.23	119.69	85.22	59.4	30.87	45.65	0.00598852	-1.1949	down	--	--	Molecular Function: calcium ion binding (GO:0005509);; Cellular Component: photosystem II oxygen evolving complex (GO:0009654);; Biological Process: photosynthesis (GO:0015979);; Cellular Component: extrinsic component of membrane (GO:0019898);;	--	--	--	PsbP	Thylakoid lumenal 19 kDa protein, chloroplastic OS=Arabidopsis thaliana OX=3702 GN=At3g63540 PE=1 SV=2	S	Function unknown	PREDICTED: thylakoid lumenal 19 kDa protein, chloroplastic-like [Daucus carota subsp. sativus]
c88004.graph_c0	463	507	481	239	250	211	10.6	12.26	12.47	6.53	6.11	5.03	4.51135e-05	-1.12196	down	[N]	Cell motility	Cellular Component: endosome (GO:0005768);; Cellular Component: trans-Golgi network (GO:0005802);; Cellular Component: plasma membrane (GO:0005886);; Cellular Component: integral component of membrane (GO:0016021);; Molecular Function: cellulose synthase (UDP-forming) activity (GO:0016760);;	K20887|0|sind:105177165|K20887 xyloglucan glycosyltransferase 4 [EC:2.4.1.-] | (RefSeq) xyloglucan glycosyltransferase 4	--	--	Glycosyl transferase family group 2;; Glycosyltransferase like family 2;; Glycosyl transferase family 21;; Glycosyl transferase family 2	Xyloglucan glycosyltransferase 4 OS=Arabidopsis thaliana OX=3702 GN=CSLC4 PE=1 SV=1	M	Cell wall/membrane/envelope biogenesis	PREDICTED: xyloglucan glycosyltransferase 4-like [Daucus carota subsp. sativus]
c71882.graph_c0	6	1	10	21	82	45	0.27	0.05	0.51	1.1	3.96	2.12	0.00724555	2.33549	up	--	--	Molecular Function: DNA binding (GO:0003677);;	K09422|1.31191e-17|pvu:PHAVU_006G064600g|K09422 myb proto-oncogene protein, plant | (RefSeq) hypothetical protein	[K]	Transcription	Myb-like DNA-binding domain;; Myb-like DNA-binding domain;; Myb-like DNA-binding domain	Transcription factor MYB119 OS=Arabidopsis thaliana OX=3702 GN=MYB119 PE=2 SV=1	K	Transcription	myb-like protein Q [Arabidopsis lyrata subsp. lyrata]
c83247.graph_c0	269	1028	532	141	40	95	8.4	33.07	17.19	5	1.08	2.97	0.000146222	-2.45758	down	--	;;	Molecular Function: protein serine/threonine kinase activity (GO:0004674);; Molecular Function: ATP binding (GO:0005524);; Biological Process: protein phosphorylation (GO:0006468);; Cellular Component: integral component of membrane (GO:0016021);;	K04733|3.85107e-122|jcu:105647575|K04733 interleukin-1 receptor-associated kinase 4 [EC:2.7.11.1] | (RefSeq) serine/threonine-protein kinase CDL1	[T]	Signal transduction mechanisms	Protein kinase domain;; Protein tyrosine kinase;; Phosphotransferase enzyme family	Probable serine/threonine-protein kinase PBL7 OS=Arabidopsis thaliana OX=3702 GN=PBL7 PE=1 SV=1	T	Signal transduction mechanisms	PREDICTED: serine/threonine-protein kinase CDL1-like isoform X1 [Daucus carota subsp. sativus]
c81592.graph_c2	433	466	344	207	81	101	55.73	61.7	47.51	30.45	9.85	13.37	0.00221804	-1.60869	down	[E]	Amino acid transport and metabolism	Molecular Function: transaminase activity (GO:0008483);; Biological Process: biosynthetic process (GO:0009058);; Molecular Function: pyridoxal phosphate binding (GO:0030170);;	K14272|1.94912e-125|vvi:100261274|K14272 glutamate--glyoxylate aminotransferase [EC:2.6.1.4 2.6.1.2 2.6.1.44] | (RefSeq) AlaT1	[E]	Amino acid transport and metabolism	Aminotransferase class I and II	Glutamate--glyoxylate aminotransferase 2 OS=Arabidopsis thaliana OX=3702 GN=GGAT2 PE=1 SV=1	E	Amino acid transport and metabolism	PREDICTED: glutamate--glyoxylate aminotransferase 2 [Daucus carota subsp. sativus]
c74033.graph_c0	427	202	175	41	50	58	29.19	14.91	13.79	3.31	3.75	4.3	2.19208e-07	-2.33246	down	--	--	--	--	--	--	--	--	S	Function unknown	PREDICTED: uncharacterized protein LOC108207483 [Daucus carota subsp. sativus]
c75756.graph_c0	0	1	12	48	150	93	0	0.09	1.1	4.54	13.2	7.93	0.000232416	3.14736	up	--	--	--	--	--	--	Protein of unknown function, DUF538	Uncharacterized protein At5g01610 OS=Arabidopsis thaliana OX=3702 GN=At5g01610 PE=1 SV=1	S	Function unknown	PREDICTED: uncharacterized protein At5g01610-like [Daucus carota subsp. sativus]
c88697.graph_c0	326	513	325	173	78	128	9.59	16.21	11.28	6.02	2.35	3.8	0.00249771	-1.57722	down	--	--	--	--	--	--	--	Uncharacterized GPI-anchored protein At1g61900 OS=Arabidopsis thaliana OX=3702 GN=At1g61900 PE=1 SV=1	S	Function unknown	PREDICTED: uncharacterized GPI-anchored protein At1g61900 [Daucus carota subsp. sativus]
c78535.graph_c0	6	6	18	43	120	63	0.16	0.19	0.59	1.44	4.17	1.89	0.000877511	2.36497	up	[T]	Signal transduction mechanisms	Molecular Function: magnesium ion binding (GO:0000287);; Molecular Function: pyruvate kinase activity (GO:0004743);; Biological Process: glycolytic process (GO:0006096);; Molecular Function: kinase activity (GO:0016301);; Molecular Function: potassium ion binding (GO:0030955);;	K00873|0|mdm:103412636|K00873 pyruvate kinase [EC:2.7.1.40] | (RefSeq) pyruvate kinase, cytosolic isozyme	[G]	Carbohydrate transport and metabolism	Pyruvate kinase, barrel domain;; Pyruvate kinase, alpha/beta domain;; Pyruvate kinase, barrel domain	Pyruvate kinase, cytosolic isozyme OS=Nicotiana tabacum OX=4097 PE=2 SV=1	G	Carbohydrate transport and metabolism	PREDICTED: probable pyruvate kinase, cytosolic isozyme [Daucus carota subsp. sativus]
c86992.graph_c1	170	114	135	295	450	338	17.12	12.1	15.92	34.11	46.8	34.75	2.95895e-05	1.24618	up	--	--	--	--	--	--	Protein tyrosine kinase	G-type lectin S-receptor-like serine/threonine-protein kinase At4g27290 OS=Arabidopsis thaliana OX=3702 GN=At4g27290 PE=3 SV=4	T	Signal transduction mechanisms	PREDICTED: G-type lectin S-receptor-like serine/threonine-protein kinase At4g27290 isoform X3 [Daucus carota subsp. sativus]
c86684.graph_c0	9246	15004	8891	5000	2706	4030	533.5	915.08	569.17	342.36	167.4	255.26	0.000826244	-1.49807	down	[C]	Energy production and conversion	Biological Process: tRNA processing (GO:0008033);; Cellular Component: chloroplast (GO:0009507);; Biological Process: vitamin E biosynthetic process (GO:0010189);; Biological Process: photosynthesis (GO:0015979);; Biological Process: chlorophyll biosynthetic process (GO:0015995);; Molecular Function: oxidoreductase activity, acting on the CH-CH group of donors, NAD or NADP as acceptor (GO:0016628…	K10960|6.00487e-76|vvi:100243277|K10960 geranylgeranyl diphosphate/geranylgeranyl-bacteriochlorophyllide a reductase [EC:1.3.1.83 1.3.1.111] | (RefSeq) geranylgeranyl diphosphate reductase, chloroplastic	--	--	--	Geranylgeranyl diphosphate reductase, chloroplastic OS=Nicotiana tabacum OX=4097 GN=CHLP PE=2 SV=1	C	Energy production and conversion	PREDICTED: geranylgeranyl diphosphate reductase, chloroplastic [Daucus carota subsp. sativus]
c75241.graph_c0	1409	1077	772	382	422	440	115.05	94.66	72.61	37.59	39.95	40.75	5.36135e-06	-1.42717	down	--	--	Cellular Component: cytoplasm (GO:0005737);; Biological Process: metal ion transport (GO:0030001);; Molecular Function: transition metal ion binding (GO:0046914);; Biological Process: cellular transition metal ion homeostasis (GO:0046916);;	--	[P]	Inorganic ion transport and metabolism	Heavy-metal-associated domain	Heavy metal-associated isoprenylated plant protein 39 OS=Arabidopsis thaliana OX=3702 GN=HIPP39 PE=2 SV=1	S	Function unknown	PREDICTED: UPF0329 protein ECU05_1680/ECU11_0050-like [Daucus carota subsp. sativus]
c88094.graph_c0	2195	1856	1354	895	419	554	90.23	81.77	63.22	41.02	17.72	23.48	0.00072899	-1.50145	down	--	--	--	K19042|1.48138e-140|jcu:105644618|K19042 E3 ubiquitin-protein ligase BOI and related proteins [EC:2.3.2.27] | (RefSeq) BOI-related E3 ubiquitin-protein ligase 1-like	[O]	Posttranslational modification, protein turnover, chaperones	Zinc finger, C3HC4 type (RING finger)	E3 ubiquitin-protein ligase BOI OS=Arabidopsis thaliana OX=3702 GN=BOI PE=1 SV=1	S	Function unknown	PREDICTED: E3 ubiquitin-protein ligase BOI [Daucus carota subsp. sativus]
c71284.graph_c0	3	1	12	20	92	77	0.21	0.08	0.98	1.68	7.18	5.84	0.00334669	2.5841	up	--	--	--	--	--	--	--	--	S	Function unknown	hypothetical protein A4A49_10971 [Nicotiana attenuata]
c75040.graph_c0	88	94	80	40	20	26	3.23	3.72	3.37	1.73	0.8	1.02	0.00845316	-1.53659	down	[G]	Carbohydrate transport and metabolism	Molecular Function: alpha-L-fucosidase activity (GO:0004560);; Cellular Component: vacuole (GO:0005773);; Biological Process: fucose metabolic process (GO:0006004);;	K01206|0|vvi:100244570|K01206 alpha-L-fucosidase [EC:3.2.1.51] | (RefSeq) alpha-L-fucosidase 1-like	[G]	Carbohydrate transport and metabolism	Alpha-L-fucosidase	Alpha-L-fucosidase 1 OS=Arabidopsis thaliana OX=3702 GN=FUC1 PE=1 SV=2	G	Carbohydrate transport and metabolism	PREDICTED: alpha-L-fucosidase 1-like [Daucus carota subsp. sativus]
c77445.graph_c0	69	54	338	856	2451	1902	5.12	4.32	27.91	73.49	195.16	146.99	3.98258e-06	2.9328	up	--	--	--	--	--	--	--	--	S	Function unknown	hypothetical protein DCAR_008028 [Daucus carota subsp. sativus]
c65550.graph_c0	694	652	493	295	308	285	20.21	20.41	16.47	10.15	9.81	8.83	0.000152256	-1.11275	down	--	--	Cellular Component: protein phosphatase type 2A complex (GO:0000159);; Biological Process: signal transduction (GO:0007165);; Biological Process: regulation of phosphoprotein phosphatase activity (GO:0034047);;	K11584|0|sind:105174181|K11584 serine/threonine-protein phosphatase 2A regulatory subunit B' | (RefSeq) serine/threonine protein phosphatase 2A 57 kDa regulatory subunit B' beta isoform	[T]	Signal transduction mechanisms	Protein phosphatase 2A regulatory B subunit (B56 family)	Serine/threonine protein phosphatase 2A 57 kDa regulatory subunit B&apos; beta isoform OS=Arabidopsis thaliana OX=3702 GN=B&apos;BETA PE=1 SV=1	T	Signal transduction mechanisms	PREDICTED: serine/threonine protein phosphatase 2A 57 kDa regulatory subunit B&apos; beta isoform [Daucus carota subsp. sativus]
c88725.graph_c0	35407	49966	33970	18665	11608	14854	2466.83	3747.81	2721.66	1507.31	866.45	1077.4	0.000201898	-1.42647	down	--	--	Molecular Function: 1-acylglycerol-3-phosphate O-acyltransferase activity (GO:0003841);; Biological Process: metabolic process (GO:0008152);; Cellular Component: integral component of membrane (GO:0016021);;	K13523|0|sind:105162530|K13523 lysophosphatidic acid acyltransferase / lysophosphatidylinositol acyltransferase [EC:2.3.1.51 2.3.1.-] | (RefSeq) 1-acyl-sn-glycerol-3-phosphate acyltransferase 2-like	[I]	Lipid transport and metabolism	Acyltransferase C-terminus;; Acyltransferase	1-acyl-sn-glycerol-3-phosphate acyltransferase 2 OS=Brassica napus OX=3708 GN=LPAT2 PE=2 SV=1	I	Lipid transport and metabolism	PREDICTED: 1-acyl-sn-glycerol-3-phosphate acyltransferase 2 [Daucus carota subsp. sativus]
c84552.graph_c1	306	197	228	52	70	20	26.12	18.44	21.91	5.07	6.71	1.88	2.14574e-06	-2.28156	down	--	--	Cellular Component: plant-type vacuole membrane (GO:0009705);; Molecular Function: malate transmembrane transporter activity (GO:0015140);; Biological Process: malate transport (GO:0015743);; Cellular Component: integral component of membrane (GO:0016021);;	--	[R]	General function prediction only	Aluminium activated malate transporter	Aluminum-activated malate transporter 12 OS=Arabidopsis thaliana OX=3702 GN=ALMT12 PE=2 SV=1	S	Function unknown	PREDICTED: aluminum-activated malate transporter 12-like isoform X2 [Daucus carota subsp. sativus]
c82633.graph_c0	61	47	69	200	287	270	1.83	1.57	2.3	7.32	9.48	9.13	3.99656e-09	1.9375	up	--	--	--	K07200|3.43152e-109|sot:102602555|K07200 5'-AMP-activated protein kinase, regulatory gamma subunit | (RefSeq) sucrose nonfermenting 4-like protein	[C]	Energy production and conversion	Glycogen recognition site of AMP-activated protein kinase;; CBS domain;; CBS domain	Sucrose nonfermenting 4-like protein OS=Arabidopsis thaliana OX=3702 GN=SNF4 PE=1 SV=1	S	Function unknown	PREDICTED: sucrose nonfermenting 4-like protein [Daucus carota subsp. sativus]
c91721.graph_c0	2819	1885	2320	1307	720	788	44.41	31.87	41.73	23.93	12.1	12.91	0.000778239	-1.31181	down	[S]	Function unknown	Molecular Function: ATP binding (GO:0005524);; Cellular Component: nucleus (GO:0005634);; Cellular Component: cytosol (GO:0005829);; Biological Process: carbohydrate metabolic process (GO:0005975);; Biological Process: cellular amino acid metabolic process (GO:0006520);; Cellular Component: membrane (GO:0016020);; Molecular Function: 1-phosphatidylinositol-4-phosphate 5-kinase activity (GO:001630…	K00889|0|sind:105174246|K00889 1-phosphatidylinositol-4-phosphate 5-kinase [EC:2.7.1.68] | (RefSeq) phosphatidylinositol 4-phosphate 5-kinase 9-like	[T]	Signal transduction mechanisms	Phosphatidylinositol-4-phosphate 5-Kinase;; MORN repeat	Phosphatidylinositol 4-phosphate 5-kinase 9 OS=Arabidopsis thaliana OX=3702 GN=PIP5K9 PE=1 SV=2	T	Signal transduction mechanisms	PREDICTED: phosphatidylinositol 4-phosphate 5-kinase 9 isoform X2 [Daucus carota subsp. sativus]
c68568.graph_c0	78	78	73	32	15	24	3.63	3.94	4.05	1.72	0.84	1.28	0.00809037	-1.59597	down	[M]	Cell wall/membrane/envelope biogenesis	Molecular Function: catalytic activity (GO:0003824);;	--	[V]	Defense mechanisms	NAD dependent epimerase/dehydratase family;; GDP-mannose 4,6 dehydratase;; NAD(P)H-binding;; 3-beta hydroxysteroid dehydrogenase/isomerase family;; NmrA-like family;; Male sterility protein	Dihydroflavonol 4-reductase OS=Dianthus caryophyllus OX=3570 GN=A PE=2 SV=1	M	Cell wall/membrane/envelope biogenesis	hypothetical protein DCAR_022383 [Daucus carota subsp. sativus]
c86508.graph_c0	587	887	782	278	277	285	15.65	25.48	23.9	8.75	8.03	8.09	7.23825e-06	-1.47866	down	[GI]	Carbohydrate transport and metabolism ;; Lipid transport and metabolism	Cellular Component: membrane (GO:0016020);; Molecular Function: pectinesterase activity (GO:0030599);; Molecular Function: pectinesterase inhibitor activity (GO:0046910);; Cellular Component: cell periphery (GO:0071944);;	--	--	--	Plant invertase/pectin methylesterase inhibitor;; Pectinesterase	Probable pectinesterase/pectinesterase inhibitor 61 OS=Arabidopsis thaliana OX=3702 GN=PME61 PE=2 SV=1	G	Carbohydrate transport and metabolism	PREDICTED: probable pectinesterase/pectinesterase inhibitor 34 [Daucus carota subsp. sativus]
c87891.graph_c0	61	57	58	13	29	11	5.73	5.73	6.16	1.52	2.96	1.12	0.00938917	-1.66525	down	[J]	Translation, ribosomal structure and biogenesis	Molecular Function: nucleotide binding (GO:0000166);; Molecular Function: aminoacyl-tRNA ligase activity (GO:0004812);; Biological Process: tRNA aminoacylation for protein translation (GO:0006418);;	K01893|2.92972e-68|vvi:100249892|K01893 asparaginyl-tRNA synthetase [EC:6.1.1.22] | (RefSeq) asparagine--tRNA ligase, chloroplastic/mitochondrial	[J]	Translation, ribosomal structure and biogenesis	--	Asparagine--tRNA ligase, chloroplastic/mitochondrial OS=Arabidopsis thaliana OX=3702 GN=SYNO PE=2 SV=3	J	Translation, ribosomal structure and biogenesis	hypothetical protein DCAR_008493 [Daucus carota subsp. sativus]
c81111.graph_c1	145	123	161	297	266	427	14.6	13.27	18.53	35.39	29.51	45.89	0.00799964	1.09225	up	--	--	--	--	[K]	Transcription	--	BEL1-like homeodomain protein 2 OS=Arabidopsis thaliana OX=3702 GN=BLH2 PE=1 SV=3	K	Transcription	PREDICTED: BEL1-like homeodomain protein 2 [Daucus carota subsp. sativus]
c85419.graph_c0	126	282	97	47	12	19	8.66	17.21	7.25	3.04	0.92	0.92	0.00101636	-2.3537	down	--	--	Molecular Function: DNA binding (GO:0003677);; Molecular Function: transcription factor activity, sequence-specific DNA binding (GO:0003700);; Cellular Component: nucleus (GO:0005634);; Biological Process: regulation of transcription, DNA-templated (GO:0006355);; Biological Process: multicellular organism development (GO:0007275);;	K09284|2.79619e-84|vvi:100246815|K09284 AP2-like factor, euAP2 lineage | (RefSeq) ethylene-responsive transcription factor RAP2-7	--	--	AP2 domain	Floral homeotic protein APETALA 2 OS=Arabidopsis thaliana OX=3702 GN=AP2 PE=1 SV=1	K	Transcription	PREDICTED: AP2-like ethylene-responsive transcription factor TOE3 [Daucus carota subsp. sativus]
c93528.graph_c0	17	17	21	1	0	2	2.53	2.72	3.59	0.18	0	0.32	0.00446024	-2.73345	down	--	--	--	--	--	--	--	--	S	Function unknown	PREDICTED: uncharacterized protein LOC108225246 isoform X1 [Daucus carota subsp. sativus]
c55285.graph_c0	1	1	1	7	40	23	0.18	0.19	0.2	1.48	7.91	4.36	0.00424908	2.76949	up	--	--	--	--	[R]	General function prediction only	--	Receptor-like protein 9DC3 OS=Solanum pimpinellifolium OX=4084 GN=9DC3 PE=3 SV=1	S	Function unknown	PREDICTED: receptor-like protein 12 [Daucus carota subsp. sativus]
c92301.graph_c0	50	106	60	7	9	16	1.51	3.44	2.06	0.25	0.29	0.51	0.000194657	-2.477	down	[K]	Transcription	Cellular Component: phragmoplast (GO:0009524);; Cellular Component: preprophase band (GO:0009574);; Cellular Component: cortical microtubule (GO:0055028);;	--	[T]	Signal transduction mechanisms	Leucine Rich repeats (2 copies);; Leucine rich repeat;; Leucine-rich repeat	187-kDa microtubule-associated protein AIR9 OS=Arabidopsis thaliana OX=3702 GN=AIR9 PE=1 SV=1	S	Function unknown	hypothetical protein DCAR_003864 [Daucus carota subsp. sativus]
c86802.graph_c0	224	178	199	470	1062	642	6.92	6	6.95	17.2	35.74	21.42	6.2682e-07	1.67934	up	--	--	Molecular Function: DNA binding (GO:0003677);; Cellular Component: nucleus (GO:0005634);; Biological Process: regulation of transcription, DNA-templated (GO:0006355);;	--	[O]	Posttranslational modification, protein turnover, chaperones	Myb-like DNA-binding domain;; Myb-like DNA-binding domain	Transcription factor SRM1 OS=Arabidopsis thaliana OX=3702 GN=SRM1 PE=1 SV=1	K	Transcription	PREDICTED: transcription factor DIVARICATA-like isoform X1 [Daucus carota subsp. sativus]
c82501.graph_c0	832	372	745	1218	2272	1655	33.59	16.14	32.76	58.64	92.67	66.92	0.00101636	1.26619	up	--	--	--	--	--	--	Domain of unknown function (DUF4228)	--	S	Function unknown	PREDICTED: uncharacterized protein LOC108194196 [Daucus carota subsp. sativus]
c78843.graph_c0	203	171	212	343	467	517	10.97	9.61	12.95	21.63	27.71	29.67	0.000653019	1.06398	up	--	--	Molecular Function: zinc ion binding (GO:0008270);; Cellular Component: integral component of membrane (GO:0016021);;	--	[A]	RNA processing and modification	RING-variant domain	--	O	Posttranslational modification, protein turnover, chaperones	PREDICTED: uncharacterized protein LOC108210890 [Daucus carota subsp. sativus]
c92097.graph_c1	1350	2543	1426	765	241	604	47.21	97.47	56.24	31.45	8.95	22.13	0.00544469	-1.63907	down	--	--	Biological Process: transport (GO:0006810);; Cellular Component: integral component of membrane (GO:0016021);;	K15109|7.40851e-158|mdm:103436892|K15109 solute carrier family 25 (mitochondrial carnitine/acylcarnitine transporter), member 20/29 | (RefSeq) mitochondrial carnitine/acylcarnitine carrier-like protein	[C]	Energy production and conversion	Mitochondrial carrier protein	Mitochondrial carnitine/acylcarnitine carrier-like protein OS=Arabidopsis thaliana OX=3702 GN=BOU PE=1 SV=1	S	Function unknown	PREDICTED: mitochondrial carnitine/acylcarnitine carrier-like protein [Daucus carota subsp. sativus]
c81295.graph_c1	341	386	658	966	1979	1383	9.18	11.25	21	32.3	59.89	42.75	0.000295955	1.45885	up	[E]	Amino acid transport and metabolism	Biological Process: cellular amino acid metabolic process (GO:0006520);; Molecular Function: transaminase activity (GO:0008483);; Biological Process: biosynthetic process (GO:0009058);; Molecular Function: pyridoxal phosphate binding (GO:0030170);;	K00815|1.82445e-139|cit:102611153|K00815 tyrosine aminotransferase [EC:2.6.1.5] | (RefSeq) tyrosine aminotransferase	[E]	Amino acid transport and metabolism	Aminotransferase class I and II;; Beta-eliminating lyase;; Aminotransferase class I and II	S-alkyl-thiohydroximate lyase SUR1 OS=Arabidopsis thaliana OX=3702 GN=SUR1 PE=1 SV=1	E	Amino acid transport and metabolism	PREDICTED: probable aminotransferase TAT2 [Daucus carota subsp. sativus]
c71208.graph_c0	31	74	59	6	2	1	2.82	7.25	6.17	0.65	0.2	0.1	1.23404e-05	-3.32651	down	--	--	Molecular Function: protein phosphatase inhibitor activity (GO:0004864);; Molecular Function: receptor activity (GO:0004872);; Cellular Component: nucleus (GO:0005634);; Cellular Component: cytoplasm (GO:0005737);; Biological Process: abscisic acid-activated signaling pathway (GO:0009738);; Molecular Function: abscisic acid binding (GO:0010427);; Biological Process: negative regulation of catalyt…	K14496|1.4294e-105|rcu:8284601|K14496 abscisic acid receptor PYR/PYL family | (RefSeq) abscisic acid receptor PYR1	--	--	Polyketide cyclase / dehydrase and lipid transport;; Polyketide cyclase / dehydrase and lipid transport	Abscisic acid receptor PYR1 OS=Arabidopsis thaliana OX=3702 GN=PYR1 PE=1 SV=1	S	Function unknown	PREDICTED: abscisic acid receptor PYL1-like [Daucus carota subsp. sativus]
c82788.graph_c0	69	103	86	21	7	19	3.8	6.45	6.11	1.31	0.64	0.99	0.00047937	-2.22429	down	--	--	Cellular Component: extracellular region (GO:0005576);; Cellular Component: cell wall (GO:0005618);; Biological Process: plant-type cell wall organization (GO:0009664);; Biological Process: unidimensional cell growth (GO:0009826);; Cellular Component: membrane (GO:0016020);; Biological Process: primary root development (GO:0080022);;	--	--	--	Pollen allergen;; Lytic transglycolase	Expansin-A1 OS=Arabidopsis thaliana OX=3702 GN=EXPA1 PE=2 SV=1	G	Carbohydrate transport and metabolism	PREDICTED: expansin-A15 [Daucus carota subsp. sativus]
c79380.graph_c0	73	68	44	17	17	16	4.38	4.29	3.04	1.23	1.14	1.07	0.00222262	-1.79472	down	--	--	Biological Process: stomatal complex patterning (GO:0010375);; Biological Process: negative regulation of stomatal complex development (GO:2000122);;	K20729|7.96557e-32|cic:CICLE_v10017558mg|K20729 protein EPIDERMAL PATTERNING FACTOR 1/2 | (RefSeq) hypothetical protein	--	--	Epidermal patterning factor proteins	Protein EPIDERMAL PATTERNING FACTOR 1 OS=Arabidopsis thaliana OX=3702 GN=EPF1 PE=1 SV=1	S	Function unknown	hypothetical protein DCAR_009739 [Daucus carota subsp. sativus]
c79046.graph_c0	143	97	182	224	407	410	10.88	7.96	15.89	20.19	34.09	33.34	0.00893489	1.1581	up	[R]	General function prediction only	Molecular Function: GTP binding (GO:0005525);; Cellular Component: intracellular (GO:0005622);; Cellular Component: plasma membrane (GO:0005886);; Biological Process: small GTPase mediated signal transduction (GO:0007264);;	K07904|1.48426e-85|bvg:104900042|K07904 Ras-related protein Rab-11A | (RefSeq) ras-related protein Rab2BV	[U]	Intracellular trafficking, secretion, and vesicular transport	Ras family;; Ras of Complex, Roc, domain of DAPkinase;; ADP-ribosylation factor family	Ras-related protein Rab2BV OS=Beta vulgaris OX=161934 GN=RAB2BV PE=2 SV=1	S	Function unknown	hypothetical protein DCAR_018930 [Daucus carota subsp. sativus]
c86667.graph_c1	321	190	515	1144	1654	1101	11.94	7.66	21.38	55.35	72.68	49.33	9.57933e-06	1.75433	up	[N]	Cell motility	Molecular Function: UDP-glucose 4-epimerase activity (GO:0003978);; Biological Process: galactose metabolic process (GO:0006012);; Cellular Component: integral component of membrane (GO:0016021);;	K12448|3.08861e-147|tcc:TCM_026984|K12448 UDP-arabinose 4-epimerase [EC:5.1.3.5] | (RefSeq) NAD(P)-binding Rossmann-fold superfamily protein isoform 1	[M]	Cell wall/membrane/envelope biogenesis	NAD dependent epimerase/dehydratase family;; GDP-mannose 4,6 dehydratase;; 3-beta hydroxysteroid dehydrogenase/isomerase family;; RmlD substrate binding domain;; Male sterility protein;; Polysaccharide biosynthesis protein;; GDP-mannose 4,6 dehydratase;; NAD dependent epimerase/dehydratase family;; Polysaccharide biosynthesis protein	Putative UDP-arabinose 4-epimerase 2 OS=Arabidopsis thaliana OX=3702 GN=At2g34850 PE=2 SV=3	M	Cell wall/membrane/envelope biogenesis	PREDICTED: UDP-arabinose 4-epimerase 1 [Daucus carota subsp. sativus]
c80589.graph_c0	0	0	5	34	325	63	0	0	0.25	1.74	15.22	2.89	1.50199e-06	4.06456	up	--	--	Molecular Function: nucleotide binding (GO:0000166);; Cellular Component: intracellular (GO:0005622);; Biological Process: phosphorylation (GO:0016310);; Biological Process: inositol phosphate metabolic process (GO:0043647);; Molecular Function: metal ion binding (GO:0046872);; Molecular Function: inositol trisphosphate kinase activity (GO:0051766);;	K00913|5.20579e-95|jcu:105632459|K00913 inositol-1,3,4-trisphosphate 5/6-kinase / inositol-tetrakisphosphate 1-kinase [EC:2.7.1.159 2.7.1.134] | (RefSeq) inositol-tetrakisphosphate 1-kinase 1	--	--	Inositol 1, 3, 4-trisphosphate 5/6-kinase	Inositol-tetrakisphosphate 1-kinase 1 OS=Arabidopsis thaliana OX=3702 GN=ITPK1 PE=1 SV=1	G	Carbohydrate transport and metabolism	PREDICTED: inositol-tetrakisphosphate 1-kinase 1-like [Daucus carota subsp. sativus]
c84734.graph_c0	721	776	683	284	336	338	29.17	39.29	33.58	13.06	12.14	12.19	7.6411e-07	-1.2577	down	[C]	Energy production and conversion	Molecular Function: iron ion binding (GO:0005506);; Cellular Component: plasma membrane (GO:0005886);; Biological Process: transport (GO:0006810);; Molecular Function: NADH dehydrogenase (ubiquinone) activity (GO:0008137);; Cellular Component: chloroplast thylakoid membrane (GO:0009535);; Biological Process: photosynthesis, light reaction (GO:0019684);; Molecular Function: quinone binding (GO:004…	K05582|2.89498e-144|sind:11452413|K05582 NAD(P)H-quinone oxidoreductase subunit K [EC:1.6.5.3] | (RefSeq) ndhK, SIC0514; NADH dehydrogenase subunit K	[C]	Energy production and conversion	Protein of unknown function (DUF740);; NADH ubiquinone oxidoreductase, 20 Kd subunit	NAD(P)H-quinone oxidoreductase subunit K, chloroplastic OS=Daucus carota OX=4039 GN=ndhK PE=3 SV=2	C	Energy production and conversion	NADH-plastoquinone oxidoreductase subunit K (chloroplast) [Pterygopleurum neurophyllum]
c61218.graph_c0	185	48	153	499	396	399	10.3	2.76	9.93	33.27	25.64	24.1	0.00292674	1.58661	up	[I]	Lipid transport and metabolism	--	--	--	--	alpha/beta hydrolase fold;; Alpha/beta hydrolase family;; Serine aminopeptidase, S33	Polyneuridine-aldehyde esterase OS=Rauvolfia serpentina OX=4060 GN=PNAE PE=1 SV=1	--	--	hypothetical protein CDL15_Pgr013506 [Punica granatum]
c62019.graph_c0	33	29	42	86	134	117	2.52	2.38	3.68	7.78	11.27	9.56	0.000874513	1.51183	up	--	--	--	--	[S]	Function unknown	Eukaryotic protein of unknown function (DUF842)	--	S	Function unknown	PREDICTED: protein FAM136A-like [Daucus carota subsp. sativus]
c83389.graph_c0	354	868	468	175	83	125	17.13	45.02	25.11	10.61	4.1	7.64	0.000145827	-2.04827	down	--	--	Cellular Component: membrane (GO:0016020);;	--	--	--	Salt stress response/antifungal	Cysteine-rich repeat secretory protein 60 OS=Arabidopsis thaliana OX=3702 GN=CRRSP60 PE=1 SV=1	U	Intracellular trafficking, secretion, and vesicular transport	PREDICTED: cysteine-rich repeat secretory protein 60-like [Daucus carota subsp. sativus]
c92438.graph_c0	936	1455	1102	1818	5123	2725	23.06	37.57	30.81	52.79	142.64	71	0.0080228	1.24561	up	[E]	Amino acid transport and metabolism	Molecular Function: 3-deoxy-7-phosphoheptulonate synthase activity (GO:0003849);; Cellular Component: mitochondrion (GO:0005739);; Biological Process: aromatic amino acid family biosynthetic process (GO:0009073);; Biological Process: chorismate biosynthetic process (GO:0009423);; Cellular Component: chloroplast (GO:0009507);; Molecular Function: lyase activity (GO:0016829);;	K01626|0|sly:544152|K01626 3-deoxy-7-phosphoheptulonate synthase [EC:2.5.1.54] | (RefSeq) phospho-2-dehydro-3-deoxyheptonate aldolase	--	--	Class-II DAHP synthetase family	Phospho-2-dehydro-3-deoxyheptonate aldolase 2, chloroplastic OS=Solanum tuberosum OX=4113 GN=SHKB PE=2 SV=1	E	Amino acid transport and metabolism	PREDICTED: phospho-2-dehydro-3-deoxyheptonate aldolase 2, chloroplastic [Daucus carota subsp. sativus]
c85819.graph_c0	1004	910	786	271	269	298	32.64	31.87	29.42	10.39	9.52	10.33	2.564e-12	-1.73514	down	[G]	Carbohydrate transport and metabolism	Molecular Function: alpha,alpha-trehalose-phosphate synthase (UDP-forming) activity (GO:0003825);; Molecular Function: trehalose-phosphatase activity (GO:0004805);; Biological Process: trehalose biosynthetic process (GO:0005992);; Biological Process: dephosphorylation (GO:0016311);;	K16055|0|sind:105180305|K16055 trehalose 6-phosphate synthase/phosphatase [EC:2.4.1.15 3.1.3.12] | (RefSeq) alpha,alpha-trehalose-phosphate synthase [UDP-forming] 1-like	[G]	Carbohydrate transport and metabolism	Trehalose-phosphatase;; Glycosyltransferase family 20;; Trehalose-phosphatase	Alpha,alpha-trehalose-phosphate synthase [UDP-forming] 1 OS=Arabidopsis thaliana OX=3702 GN=TPS1 PE=1 SV=1	G	Carbohydrate transport and metabolism	hypothetical protein DCAR_007921 [Daucus carota subsp. sativus]
c84565.graph_c0	312	250	288	482	854	642	17.42	14.66	18.54	28.92	49.9	36.51	0.000154378	1.09084	up	--	--	Molecular Function: nucleotide binding (GO:0000166);; Molecular Function: nucleic acid binding (GO:0003676);;	K12900|5.53635e-26|rcu:8258405|K12900 FUS-interacting serine-arginine-rich protein 1 | (RefSeq) serine/arginine-rich SC35-like splicing factor SCL33	[R]	General function prediction only	RNA recognition motif. (a.k.a. RRM, RBD, or RNP domain);; RNA recognition motif. (a.k.a. RRM, RBD, or RNP domain)	Serine/arginine-rich SC35-like splicing factor SCL30A OS=Arabidopsis thaliana OX=3702 GN=SCL30A PE=1 SV=1	S	Function unknown	PREDICTED: serine/arginine-rich SC35-like splicing factor SCL33 [Daucus carota subsp. sativus]
c90285.graph_c1	649	351	971	1217	1942	1951	45.25	26.53	79.89	106.72	153.02	156.37	0.00685677	1.23263	up	--	--	Molecular Function: DNA binding (GO:0003677);; Cellular Component: nucleus (GO:0005634);; Biological Process: regulation of transcription, DNA-templated (GO:0006355);; Cellular Component: integral component of membrane (GO:0016021);;	--	--	--	No apical meristem (NAM) protein	NAC domain-containing protein 78 OS=Arabidopsis thaliana OX=3702 GN=NAC078 PE=2 SV=2	S	Function unknown	PREDICTED: NAC domain-containing protein 53-like isoform X2 [Daucus carota subsp. sativus]
c84857.graph_c0	1268	1094	984	533	205	303	47.77	45.13	43.34	23.95	8.83	13	0.000554879	-1.6254	down	--	--	--	--	--	--	Helix-loop-helix DNA-binding domain	Transcription factor UNE10 OS=Arabidopsis thaliana OX=3702 GN=UNE10 PE=2 SV=1	K	Transcription	PREDICTED: transcription factor PIF7-like [Daucus carota subsp. sativus]
c79686.graph_c0	498	568	434	198	189	186	20.26	25.73	20.75	8.69	8.29	7.82	2.03215e-06	-1.44091	down	--	--	Molecular Function: peroxidase activity (GO:0004601);; Biological Process: response to oxidative stress (GO:0006979);; Biological Process: seed germination (GO:0009845);; Biological Process: seed maturation (GO:0010431);; Molecular Function: heme binding (GO:0020037);; Biological Process: oxidation-reduction process (GO:0055114);; Biological Process: cellular oxidant detoxification (GO:0098869);;	K00434|1.58208e-54|vvi:100247405|K00434 L-ascorbate peroxidase [EC:1.11.1.11] | (RefSeq) L-ascorbate peroxidase-like	--	--	Peroxidase;; Peroxidase	Putative L-ascorbate peroxidase 6 OS=Arabidopsis thaliana OX=3702 GN=APX6 PE=2 SV=1	P	Inorganic ion transport and metabolism	PREDICTED: putative L-ascorbate peroxidase 6 isoform X1 [Daucus carota subsp. sativus]
c82757.graph_c1	579	468	359	81	17	44	20.82	18.88	15.13	3.43	0.67	1.68	5.09109e-08	-2.99535	down	--	--	Cellular Component: cytoplasm (GO:0005737);; Biological Process: metal ion transport (GO:0030001);; Molecular Function: transition metal ion binding (GO:0046914);; Biological Process: cellular transition metal ion homeostasis (GO:0046916);;	--	[P]	Inorganic ion transport and metabolism	Heavy-metal-associated domain	Protein SODIUM POTASSIUM ROOT DEFECTIVE 1 OS=Arabidopsis thaliana OX=3702 GN=NAKR1 PE=1 SV=1	S	Function unknown	PREDICTED: uncharacterized protein LOC108192508 [Daucus carota subsp. sativus]
c85044.graph_c0	1132	988	1067	1864	3315	2522	37.35	34.74	40.45	68.66	117.47	84.01	6.12243e-06	1.14499	up	--	--	--	K10523|9.04011e-104|tcc:TCM_030560|K10523 speckle-type POZ protein | (RefSeq) BTB/POZ domain-containing protein	[DR]	--	BTB/POZ domain	BTB/POZ domain-containing protein At1g55760 OS=Arabidopsis thaliana OX=3702 GN=At1g55760 PE=2 SV=1	S	Function unknown	PREDICTED: BTB/POZ domain-containing protein At1g55760-like [Daucus carota subsp. sativus]
c84514.graph_c0	54	24	27	7	5	2	2.15	1.02	1.23	0.33	0.22	0.08	0.00365232	-2.36797	down	[M]	Cell wall/membrane/envelope biogenesis	Molecular Function: protein serine/threonine kinase activity (GO:0004674);; Molecular Function: ATP binding (GO:0005524);; Cellular Component: plasma membrane (GO:0005886);; Biological Process: protein phosphorylation (GO:0006468);;	K04733|1.59516e-122|cit:102619917|K04733 interleukin-1 receptor-associated kinase 4 [EC:2.7.11.1] | (RefSeq) putative serine/threonine-protein kinase	--	--	Protein kinase domain;; Protein tyrosine kinase	Cold-responsive protein kinase 1 OS=Arabidopsis thaliana OX=3702 GN=CRPK1 PE=1 SV=1	T	Signal transduction mechanisms	putative serine/threonine-protein kinase [Citrus clementina]
c92445.graph_c0	784	1195	1057	2675	3232	2930	23.8	35.38	34.08	85.23	95.31	83.69	3.5645e-06	1.39232	up	--	--	--	--	--	--	Plastocyanin-like domain	Early nodulin-like protein 2 OS=Arabidopsis thaliana OX=3702 GN=At4g27520 PE=1 SV=1	S	Function unknown	hypothetical protein DCAR_017133 [Daucus carota subsp. sativus]
c84594.graph_c0	2058	1185	1837	536	462	545	58.86	41.05	60.25	22.34	20.24	19.55	1.01993e-09	-1.73091	down	[T]	Signal transduction mechanisms	Molecular Function: nucleotide binding (GO:0000166);; Molecular Function: protein serine/threonine kinase activity (GO:0004674);; Cellular Component: nucleus (GO:0005634);; Cellular Component: cytoplasm (GO:0005737);; Biological Process: protein phosphorylation (GO:0006468);; Biological Process: intracellular signal transduction (GO:0035556);;	K12761|3.44604e-159|sot:102586013|K12761 carbon catabolite-derepressing protein kinase [EC:2.7.11.1] | (RefSeq) CBL-interacting serine/threonine-protein kinase 7-like	[T]	Signal transduction mechanisms	Protein kinase domain;; Protein tyrosine kinase;; NAF domain;; Kinase-like	CBL-interacting serine/threonine-protein kinase 4 OS=Arabidopsis thaliana OX=3702 GN=CIPK4 PE=1 SV=1	T	Signal transduction mechanisms	PREDICTED: CBL-interacting serine/threonine-protein kinase 7 [Daucus carota subsp. sativus]
c81069.graph_c0	800	422	506	218	146	145	14.36	8.31	10.58	4.45	2.69	2.79	5.69832e-06	-1.73214	down	[T]	Signal transduction mechanisms	Molecular Function: protein serine/threonine kinase activity (GO:0004674);; Molecular Function: ATP binding (GO:0005524);; Biological Process: protein phosphorylation (GO:0006468);; Biological Process: signal transduction (GO:0007165);; Cellular Component: integral component of membrane (GO:0016021);;	--	[T]	Signal transduction mechanisms	Protein kinase domain;; Protein tyrosine kinase;; NAF domain;; Kinase-like	CBL-interacting protein kinase 5 OS=Oryza sativa subsp. japonica OX=39947 GN=CIPK5 PE=2 SV=1	T	Signal transduction mechanisms	PREDICTED: CBL-interacting protein kinase 5-like [Daucus carota subsp. sativus]
c80070.graph_c0	117	83	65	15	27	15	12.51	9.2	7.99	1.93	3.28	1.66	5.26841e-05	-2.12473	down	--	--	--	--	--	--	--	--	--	--	hypothetical protein DCAR_023365 [Daucus carota subsp. sativus]
c90371.graph_c0	480	389	367	149	166	103	11.49	9.99	9.9	4.15	4.31	2.63	1.75988e-07	-1.60601	down	[T]	Signal transduction mechanisms	Molecular Function: voltage-gated potassium channel activity (GO:0005249);; Cellular Component: integral component of plasma membrane (GO:0005887);; Biological Process: regulation of membrane potential (GO:0042391);; Biological Process: potassium ion transmembrane transport (GO:0071805);;	K05391|0|sot:102583901|K05391 cyclic nucleotide gated channel, other eukaryote | (RefSeq) putative cyclic nucleotide-gated ion channel 15	[PT]	--	Ion transport protein;; Cyclic nucleotide-binding domain	Protein CNGC15c OS=Medicago truncatula OX=3880 GN=CNGC15C PE=1 SV=1	U	Intracellular trafficking, secretion, and vesicular transport	PREDICTED: putative cyclic nucleotide-gated ion channel 15 [Daucus carota subsp. sativus]
c91758.graph_c0	164	168	134	42	28	32	3.87	4.25	3.6	1.16	0.71	0.8	4.28289e-07	-2.142	down	[K]	Transcription	Cellular Component: membrane (GO:0016020);; Molecular Function: kinase activity (GO:0016301);; Biological Process: phosphorylation (GO:0016310);;	--	--	--	Protein tyrosine kinase;; Protein kinase domain;; Leucine Rich repeats (2 copies);; Leucine rich repeat;; Leucine Rich Repeat	Probable LRR receptor-like serine/threonine-protein kinase At1g14390 OS=Arabidopsis thaliana OX=3702 GN=At1g14390 PE=2 SV=1	T	Signal transduction mechanisms	PREDICTED: probable LRR receptor-like serine/threonine-protein kinase At1g14390 [Daucus carota subsp. sativus]
c83398.graph_c0	3746	3670	2397	1548	1064	1240	159.17	168.66	112.73	71.39	48.21	52.14	0.000132619	-1.37208	down	--	--	Cellular Component: chloroplast thylakoid membrane (GO:0009535);;	--	--	--	--	--	S	Function unknown	hypothetical protein DCAR_006523 [Daucus carota subsp. sativus]
c89100.graph_c0	4034	2041	2391	1127	512	914	59.86	32.51	40.99	19.43	8.28	14.45	0.000210112	-1.65815	down	--	--	Molecular Function: structural constituent of ribosome (GO:0003735);; Biological Process: translation (GO:0006412);; Cellular Component: integral component of membrane (GO:0016021);; Biological Process: transmembrane transport (GO:0055085);;	K14684|7.57002e-170|pop:POPTR_0014s09110g|K14684 solute carrier family 25 (mitochondrial phosphate transporter), member 23/24/25/41 | (RefSeq) POPTRDRAFT_731263; mitochondrial substrate carrier family protein	[C]	Energy production and conversion	Mitochondrial carrier protein	Mitochondrial adenine nucleotide transporter ADNT1 OS=Arabidopsis thaliana OX=3702 GN=ADNT1 PE=1 SV=1	S	Function unknown	PREDICTED: mitochondrial adenine nucleotide transporter ADNT1 [Daucus carota subsp. sativus]
c71674.graph_c0	325	343	215	99	64	65	9.42	10.7	7.16	3.44	2.05	2	5.67933e-06	-1.9214	down	--	--	--	--	--	--	Terpene synthase family, metal binding domain	(R)-limonene synthase 1, chloroplastic OS=Citrus limon OX=2708 PE=2 SV=1	O	Posttranslational modification, protein turnover, chaperones	PREDICTED: (R)-limonene synthase 1-like [Daucus carota subsp. sativus]
c92491.graph_c2	112	58	169	361	855	490	2.51	1.38	5.2	9.03	20.23	11.55	8.6744e-06	2.07964	up	--	--	Molecular Function: DNA binding (GO:0003677);; Cellular Component: nucleus (GO:0005634);; Biological Process: regulation of transcription, DNA-templated (GO:0006355);; Biological Process: auxin-activated signaling pathway (GO:0009734);;	--	--	--	Auxin response factor;; B3 DNA binding domain	Auxin response factor 18 OS=Oryza sativa subsp. japonica OX=39947 GN=ARF18 PE=2 SV=1	K	Transcription	PREDICTED: auxin response factor 18-like [Daucus carota subsp. sativus]
c76229.graph_c0	201	78	398	717	1790	2032	11.59	4.85	26.13	48.12	111.4	124.04	3.36803e-05	2.39197	up	[IQR]	Lipid transport and metabolism ;; Secondary metabolites biosynthesis, transport and catabolism ;; General function prediction only	--	K00059|5.2246e-63|sind:105159642|K00059 3-oxoacyl-[acyl-carrier protein] reductase [EC:1.1.1.100] | (RefSeq) short-chain type dehydrogenase/reductase	[R]	General function prediction only	short chain dehydrogenase;; Enoyl-(Acyl carrier protein) reductase;; KR domain;; Enoyl-(Acyl carrier protein) reductase	NADPH-dependent aldehyde reductase-like protein, chloroplastic OS=Arabidopsis thaliana OX=3702 GN=At3g03980 PE=3 SV=1	S	Function unknown	PREDICTED: short-chain type dehydrogenase/reductase [Daucus carota subsp. sativus]
c81535.graph_c0	11904	16845	9616	5441	2939	4821	1133.7	1725.15	1051.12	615.24	309.23	491.48	0.000472895	-1.53397	down	--	--	--	--	--	--	--	Photosystem II 5 kDa protein, chloroplastic OS=Gossypium hirsutum OX=3635 GN=PSBT PE=4 SV=1	S	Function unknown	PREDICTED: photosystem II 5 kDa protein, chloroplastic [Daucus carota subsp. sativus]
c87603.graph_c1	1166	1806	1063	482	581	417	47.24	78.2	50.01	24.34	26	18.27	2.95895e-05	-1.50868	down	[I]	Lipid transport and metabolism	Cellular Component: chloroplast envelope (GO:0009941);; Molecular Function: kinase activity (GO:0016301);; Biological Process: phosphorylation (GO:0016310);; Molecular Function: hydrolase activity, acting on ester bonds (GO:0016788);;	--	--	--	--	--	S	Function unknown	PREDICTED: uncharacterized protein LOC108205460 [Daucus carota subsp. sativus]
c80637.graph_c0	835	481	627	2579	3252	3553	34.87	21.86	30.11	125.24	147.44	155.68	1.78155e-17	2.15152	up	--	--	--	--	[U]	Intracellular trafficking, secretion, and vesicular transport	--	BEACH domain-containing protein B OS=Arabidopsis thaliana OX=3702 GN=BCHB PE=4 SV=1	S	Function unknown	hypothetical protein DCAR_012852 [Daucus carota subsp. sativus]
c87875.graph_c0	47	64	159	153	411	636	2.43	3.85	8.48	10.39	24.24	40.26	0.00953852	1.80171	up	--	--	Biological Process: protein ubiquitination (GO:0016567);; Biological Process: proteasome-mediated ubiquitin-dependent protein catabolic process (GO:0043161);; Molecular Function: metal ion binding (GO:0046872);; Biological Process: floral organ development (GO:0048437);; Molecular Function: ubiquitin protein ligase activity (GO:0061630);;	K19045|6.55068e-54|tcc:TCM_005889|K19045 E3 ubiquitin-protein ligase BIG BROTHER and related proteins [EC:2.3.2.27] | (RefSeq) RING/U-box superfamily protein isoform 1	[O]	Posttranslational modification, protein turnover, chaperones	--	E3 ubiquitin ligase BIG BROTHER OS=Arabidopsis thaliana OX=3702 GN=BB PE=1 SV=1	O	Posttranslational modification, protein turnover, chaperones	PREDICTED: E3 ubiquitin ligase BIG BROTHER [Daucus carota subsp. sativus]
c82352.graph_c0	1322	874	1110	2210	2055	2856	77.68	55.41	75.18	153.52	132.31	179.2	0.000892887	1.01893	up	--	--	--	--	--	--	--	--	--	--	hypothetical protein DCAR_014361 [Daucus carota subsp. sativus]
c87847.graph_c0	711	405	746	1274	1412	1340	29.33	16.49	32.18	63.83	65.93	62.71	0.00108934	1.01774	up	[F]	Nucleotide transport and metabolism	Cellular Component: cytoplasm (GO:0005737);; Molecular Function: hydrolase activity, acting on carbon-nitrogen (but not peptide) bonds (GO:0016810);;	K01464|0|gra:105793794|K01464 dihydropyrimidinase [EC:3.5.2.2] | (RefSeq) dihydropyrimidinase	[F]	Nucleotide transport and metabolism	Amidohydrolase family	Dihydropyrimidinase OS=Arabidopsis thaliana OX=3702 GN=PYD2 PE=1 SV=1	F	Nucleotide transport and metabolism	PREDICTED: dihydropyrimidinase isoform X2 [Daucus carota subsp. sativus]
c90645.graph_c0	17843	9240	10156	5576	693	2288	1073.72	595.41	690.04	386.45	32.95	133.81	0.00991713	-1.84032	down	--	--	Cellular Component: integral component of membrane (GO:0016021);;	--	--	--	PLAC8 family	Protein PLANT CADMIUM RESISTANCE 2 OS=Arabidopsis thaliana OX=3702 GN=PCR2 PE=1 SV=1	S	Function unknown	PREDICTED: protein PLANT CADMIUM RESISTANCE 2-like [Daucus carota subsp. sativus]
c82745.graph_c0	158	116	185	265	373	381	9.34	7.44	12.54	18.55	24.19	24.08	0.00372586	1.03312	up	--	--	Biological Process: regulation of transcription, DNA-templated (GO:0006355);;	--	--	--	GRAS domain family	Scarecrow-like protein 34 OS=Arabidopsis thaliana OX=3702 GN=SCL34 PE=3 SV=1	K	Transcription	PREDICTED: scarecrow-like protein 14 [Daucus carota subsp. sativus]
c77638.graph_c0	42	82	72	23	18	15	1.14	2.39	2.24	0.69	0.56	0.44	0.00963454	-1.70516	down	--	--	Molecular Function: hydrolase activity, hydrolyzing O-glycosyl compounds (GO:0004553);; Biological Process: carbohydrate metabolic process (GO:0005975);; Cellular Component: integral component of membrane (GO:0016021);; Molecular Function: polysaccharide binding (GO:0030247);; Cellular Component: anchored component of plasma membrane (GO:0046658);;	K19891|0|vvi:100256139|K19891 glucan endo-1,3-beta-glucosidase 1/2/3 [EC:3.2.1.39] | (RefSeq) glucan endo-1,3-beta-glucosidase 3	--	--	Glycosyl hydrolases family 17;; X8 domain	Glucan endo-1,3-beta-glucosidase 2 OS=Arabidopsis thaliana OX=3702 GN=At1g66250 PE=1 SV=2	G	Carbohydrate transport and metabolism	hypothetical protein DCAR_030255 [Daucus carota subsp. sativus]
c79207.graph_c0	247	475	225	108	151	84	12.68	26.21	13.28	7.33	8.6	4.76	0.00387576	-1.49696	down	--	--	--	--	--	--	--	--	S	Function unknown	PREDICTED: uncharacterized protein LOC108224661 isoform X2 [Daucus carota subsp. sativus]
c82343.graph_c0	491	656	408	186	215	221	34.24	49.41	32.71	15.72	16.33	16.9	0.000131384	-1.37726	down	--	--	Cellular Component: chloroplast thylakoid membrane (GO:0009535);;	--	--	--	SnoaL-like domain;; Nuclear transport factor 2 (NTF2) domain	--	S	Function unknown	PREDICTED: uncharacterized protein LOC108216225 isoform X2 [Daucus carota subsp. sativus]
c92961.graph_c1	1134	446	1237	3375	3949	2807	28.91	12	36.08	99.14	107.62	74.69	1.56688e-05	1.70122	up	[Q]	Secondary metabolites biosynthesis, transport and catabolism	Molecular Function: copper ion binding (GO:0005507);; Molecular Function: primary amine oxidase activity (GO:0008131);; Biological Process: amine metabolic process (GO:0009308);; Cellular Component: integral component of membrane (GO:0016021);; Molecular Function: quinone binding (GO:0048038);; Biological Process: oxidation-reduction process (GO:0055114);;	K00276|0|rcu:8272134|K00276 primary-amine oxidase [EC:1.4.3.21] | (RefSeq) primary amine oxidase	[Q]	Secondary metabolites biosynthesis, transport and catabolism	Copper amine oxidase, enzyme domain;; Copper amine oxidase, N3 domain;; Copper amine oxidase, N2 domain;; Copper amine oxidase, enzyme domain	Primary amine oxidase OS=Arabidopsis thaliana OX=3702 GN=At1g62810 PE=2 SV=1	Q	Secondary metabolites biosynthesis, transport and catabolism	PREDICTED: primary amine oxidase-like [Daucus carota subsp. sativus]
c88666.graph_c1	4406	3710	3001	1105	737	1005	233.61	224.19	175.26	61.54	39.2	49.52	3.61328e-10	-1.96438	down	--	--	Biological Process: transcription, DNA-templated (GO:0006351);; Biological Process: regulation of cellular process (GO:0050794);;	K14484|7.16104e-47|gmx:547949|K14484 auxin-responsive protein IAA | (RefSeq) SLR1; auxin-induced protein ali50	--	--	AUX/IAA family	Auxin-responsive protein IAA14 OS=Arabidopsis thaliana OX=3702 GN=IAA14 PE=1 SV=2	K	Transcription	PREDICTED: auxin-responsive protein IAA7-like [Daucus carota subsp. sativus]
c74950.graph_c0	33	43	30	5	6	10	8.01	11.2	8.37	1.47	1.66	2.63	0.00701751	-2.04982	down	--	--	--	--	[T]	Signal transduction mechanisms	--	Probable disease resistance protein At1g59620 OS=Arabidopsis thaliana OX=3702 GN=At1g59620 PE=2 SV=3	S	Function unknown	PREDICTED: probable disease resistance RPP8-like protein 2 [Daucus carota subsp. sativus]
c79742.graph_c0	4619	3192	3360	1261	451	862	239.1	178.46	198.84	76.75	25.42	47.71	6.31835e-06	-2.01891	down	[G]	Carbohydrate transport and metabolism	Cellular Component: extracellular region (GO:0005576);; Biological Process: cellular glucan metabolic process (GO:0006073);; Molecular Function: transferase activity, transferring glycosyl groups (GO:0016757);; Molecular Function: hydrolase activity, acting on glycosyl bonds (GO:0016798);; Biological Process: cell wall organization or biogenesis (GO:0071554);; Biological Process: cellular compone…	K08235|3.62059e-159|sly:543915|K08235 xyloglucan:xyloglucosyl transferase [EC:2.4.1.207] | (RefSeq) XTH7, LeXTH7; xyloglucan endotransglucosylase-hydrolase XTH7	--	--	Glycosyl hydrolases family 16;; Xyloglucan endo-transglycosylase (XET) C-terminus	Probable xyloglucan endotransglucosylase/hydrolase protein 7 OS=Arabidopsis thaliana OX=3702 GN=XTH7 PE=2 SV=2	G	Carbohydrate transport and metabolism	xyloglucan endotransglucosylase-hydrolase XTH7 [Solanum lycopersicum]
c82099.graph_c0	18528	13547	11957	5794	3484	6063	159.19	125.97	120.21	61.97	36.55	59.08	4.1179e-05	-1.51141	down	[M]	Cell wall/membrane/envelope biogenesis	Molecular Function: magnesium ion binding (GO:0000287);; Molecular Function: electron carrier activity (GO:0009055);; Cellular Component: photosystem I (GO:0009522);; Cellular Component: chloroplast thylakoid membrane (GO:0009535);; Biological Process: photosynthesis (GO:0015979);; Cellular Component: integral component of membrane (GO:0016021);; Molecular Function: chlorophyll binding (GO:001616…	K02689|0|sot:4099969|K02689 photosystem I P700 chlorophyll a apoprotein A1 | (RefSeq) psaA, SotuCp021; photosystem I P700 apoprotein A1	--	--	Photosystem I psaA/psaB protein;; Photosystem I psaA/psaB protein;; Tetratricopeptide repeat;; Tetratricopeptide repeat;; Tetratricopeptide repeat;; Tetratricopeptide repeat;; TPR repeat;; Tetratricopeptide repeat;; Ribosomal protein S14p/S29e	Photosystem I P700 chlorophyll a apoprotein A1 OS=Daucus carota OX=4039 GN=psaA PE=3 SV=1	C	Energy production and conversion	&apos;photosystem I P700 apoprotein A1 (chloroplast) [Vicia sativa]
c89127.graph_c0	150	226	105	11	27	23	7.45	12.13	6.1	0.68	1.46	1.18	1.03593e-07	-2.82176	down	--	--	--	--	--	--	--	--	S	Function unknown	PREDICTED: uncharacterized protein LOC108197575 [Daucus carota subsp. sativus]
c83663.graph_c0	9746	5508	12209	16187	21889	22435	528.17	321.49	763.71	1026.43	1303.41	1290.97	0.00559531	1.03144	up	--	--	--	--	--	--	PAP_fibrillin	Plastid-lipid-associated protein, chloroplastic OS=Citrus unshiu OX=55188 GN=PAP PE=2 SV=1	S	Function unknown	PREDICTED: light-induced protein, chloroplastic-like [Daucus carota subsp. sativus]
c67589.graph_c1	26	17	43	101	153	111	3.47	2.43	6.32	15.74	22.24	15.79	0.000286894	1.84813	up	[CP]	Energy production and conversion ;; Inorganic ion transport and metabolism	Molecular Function: magnesium ion binding (GO:0000287);; Molecular Function: inorganic diphosphatase activity (GO:0004427);; Cellular Component: cytosol (GO:0005829);; Biological Process: phosphate-containing compound metabolic process (GO:0006796);;	K01507|2.48555e-40|cit:102610591|K01507 inorganic pyrophosphatase [EC:3.6.1.1] | (RefSeq) soluble inorganic pyrophosphatase 1-like	[C]	Energy production and conversion	Inorganic pyrophosphatase	Soluble inorganic pyrophosphatase PPA1 OS=Solanum tuberosum OX=4113 GN=PPA1 PE=1 SV=1	C	Energy production and conversion	PREDICTED: soluble inorganic pyrophosphatase 1-like [Daucus carota subsp. sativus]
c67695.graph_c0	930	679	560	207	32	81	152.6	119.83	105.69	40.7	5.89	14.3	0.000121562	-2.43298	down	--	--	--	--	--	--	--	--	--	--	hypothetical protein DCAR_015139 [Daucus carota subsp. sativus]
c90145.graph_c1	36	24	42	75	237	142	1.45	1.29	1.63	3.65	10.52	7.37	0.00076214	1.86354	up	--	--	Cellular Component: integral component of membrane (GO:0016021);; Molecular Function: transferase activity (GO:0016740);;	--	[R]	General function prediction only	Glycosyl transferase family 90	--	S	Function unknown	PREDICTED: O-glucosyltransferase rumi homolog [Daucus carota subsp. sativus]
c74534.graph_c0	245	158	308	519	1201	729	7.29	5.06	10.5	18.15	38.89	23.07	5.26528e-05	1.60159	up	[QV]	Secondary metabolites biosynthesis, transport and catabolism ;; Defense mechanisms	Molecular Function: iron ion binding (GO:0005506);; Cellular Component: integral component of membrane (GO:0016021);; Molecular Function: heme binding (GO:0020037);; Biological Process: oxidation-reduction process (GO:0055114);; Molecular Function: aromatase activity (GO:0070330);;	--	[QI]	--	Cytochrome P450	Cytochrome P450 94A1 OS=Vicia sativa OX=3908 GN=CYP94A1 PE=2 SV=2	Q	Secondary metabolites biosynthesis, transport and catabolism	PREDICTED: LOW QUALITY PROTEIN: cytochrome P450 94A1 [Daucus carota subsp. sativus]
c93102.graph_c0	735	573	849	1502	1541	1609	14.27	11.63	18.23	35.21	32.23	34.21	6.20406e-05	1.01457	up	[V]	Defense mechanisms	Cellular Component: plant-type vacuole (GO:0000325);; Molecular Function: ATP binding (GO:0005524);; Cellular Component: vacuolar membrane (GO:0005774);; Molecular Function: sulfonylurea receptor activity (GO:0008281);; Biological Process: response to salt stress (GO:0009651);; Cellular Component: integral component of membrane (GO:0016021);; Biological Process: cellular potassium ion homeostasis…	--	[Q]	Secondary metabolites biosynthesis, transport and catabolism	ABC transporter transmembrane region;; ABC transporter;; ABC transporter;; ABC transporter transmembrane region	ABC transporter C family member 5 OS=Arabidopsis thaliana OX=3702 GN=ABCC5 PE=2 SV=2	V	Defense mechanisms	PREDICTED: ABC transporter C family member 5-like [Daucus carota subsp. sativus]
c80307.graph_c0	108	123	65	38	35	26	8.56	10.63	6.23	3.76	3.33	2.17	0.00589263	-1.54642	down	--	--	Molecular Function: protein serine/threonine phosphatase activity (GO:0004722);; Biological Process: protein dephosphorylation (GO:0006470);;	--	[T]	Signal transduction mechanisms	--	Probable protein phosphatase 2C 73 OS=Arabidopsis thaliana OX=3702 GN=PPC6-7 PE=2 SV=1	T	Signal transduction mechanisms	PREDICTED: probable protein phosphatase 2C 34 [Daucus carota subsp. sativus]
c88729.graph_c0	3775	2751	3730	1557	1066	1157	213.41	173.04	248.44	100.06	70.67	71.78	1.29419e-06	-1.4579	down	[E]	Amino acid transport and metabolism	Molecular Function: transporter activity (GO:0005215);; Biological Process: oligopeptide transport (GO:0006857);; Cellular Component: integral component of membrane (GO:0016021);;	K14638|0|sind:105164296|K14638 solute carrier family 15 (peptide/histidine transporter), member 3/4 | (RefSeq) protein NRT1/ PTR FAMILY 6.3-like	[E]	Amino acid transport and metabolism	POT family	Protein NRT1/ PTR FAMILY 6.3 OS=Arabidopsis thaliana OX=3702 GN=NPF6.3 PE=1 SV=1	E	Amino acid transport and metabolism	PREDICTED: protein NRT1/ PTR FAMILY 6.3-like [Daucus carota subsp. sativus]
c78478.graph_c0	829	691	762	444	298	227	17.54	16.39	18.87	14.03	7.18	5.64	0.00135355	-1.25179	down	--	;;	Molecular Function: protein kinase activity (GO:0004672);; Cellular Component: membrane (GO:0016020);; Biological Process: phosphorylation (GO:0016310);;	--	--	--	D-mannose binding lectin;; Protein tyrosine kinase;; Protein kinase domain;; Domain of unknown function (DUF3403)	G-type lectin S-receptor-like serine/threonine-protein kinase At1g11330 OS=Arabidopsis thaliana OX=3702 GN=At1g11330 PE=1 SV=3	T	Signal transduction mechanisms	PREDICTED: G-type lectin S-receptor-like serine/threonine-protein kinase At1g67520 [Daucus carota subsp. sativus]
c71446.graph_c0	0	0	0	22	74	18	0	0	0	1.24	3.86	0.91	5.03275e-06	4.04774	up	--	--	--	K15235|2.92126e-12|tcc:TCM_041657|K15235 josephin [EC:3.4.19.12] | (RefSeq) JOSEPHIN-like protein, putative	[R]	General function prediction only	--	--	S	Function unknown	PREDICTED: uncharacterized protein LOC108207696 [Daucus carota subsp. sativus]
c82033.graph_c0	96	151	120	42	26	12	3.2	5.46	4.55	1.64	0.94	0.43	0.000931418	-2.04499	down	--	--	--	--	--	--	--	--	--	--	hypothetical protein DCAR_025874 [Daucus carota subsp. sativus]
c82908.graph_c1	425	883	622	132	53	115	29.63	66.25	49.75	10.9	4.06	8.61	4.93558e-07	-2.53956	down	[L]	Replication, recombination and repair	Biological Process: base-excision repair (GO:0006284);; Biological Process: glutamine metabolic process (GO:0006541);; Molecular Function: DNA-3-methyladenine glycosylase activity (GO:0008725);; Molecular Function: transferase activity (GO:0016740);;	K01246|1.81659e-56|spen:107011440|K01246 DNA-3-methyladenine glycosylase I [EC:3.2.2.20] | (RefSeq) uncharacterized LOC107011440	--	--	Methyladenine glycosylase	--	L	Replication, recombination and repair	PREDICTED: uncharacterized protein LOC108205416 [Daucus carota subsp. sativus]
c89665.graph_c0	508	328	300	207	131	137	11.27	7.81	7.56	5.2	3.07	3.1	0.00408157	-1.25082	down	--	--	--	--	[BK]	--	PHD-finger	DDT domain-containing protein PTM OS=Arabidopsis thaliana OX=3702 GN=PTM PE=1 SV=1	S	Function unknown	hypothetical protein DCAR_018746 [Daucus carota subsp. sativus]
c83455.graph_c0	1319	955	952	355	126	138	40.1	32.66	34.43	14.24	4.36	4.75	4.62939e-06	-2.23817	down	[H]	Coenzyme transport and metabolism	Biological Process: metabolic process (GO:0008152);; Molecular Function: hydrolase activity (GO:0016787);;	K18551|5.82971e-92|pper:PRUPE_ppa009851mg|K18551 pyrimidine and pyridine-specific 5'-nucleotidase [EC:3.1.3.-] | (RefSeq) hypothetical protein	[R]	General function prediction only	--	--	S	Function unknown	PREDICTED: uncharacterized protein C24B11.05 [Daucus carota subsp. sativus]
c81513.graph_c0	52	74	67	148	751	272	1.99	2.98	2.79	6.75	30.1	10.99	0.000200639	2.18076	up	--	--	--	--	--	--	--	--	S	Function unknown	PREDICTED: extensin [Daucus carota subsp. sativus]
c61710.graph_c0	9	5	15	45	112	315	0.83	0.5	1.7	4.95	11.46	31.24	8.59061e-06	3.21667	up	--	--	--	--	--	--	--	--	S	Function unknown	PREDICTED: uncharacterized protein LOC108213647 [Daucus carota subsp. sativus]
c74209.graph_c0	144	90	160	336	260	384	8.27	5.57	10.59	22.83	16.35	23.52	0.00436164	1.2046	up	--	--	Cellular Component: integral component of membrane (GO:0016021);;	K20726|7.33337e-92|pper:PRUPE_ppa010911mg|K20726 transmembrane protein 222 | (RefSeq) hypothetical protein	[S]	Function unknown	Protein of unknown function (DUF778)	Protein RTE1-HOMOLOG OS=Arabidopsis thaliana OX=3702 GN=RTH PE=2 SV=1	S	Function unknown	PREDICTED: protein RTE1-HOMOLOG isoform X1 [Daucus carota subsp. sativus]
c89754.graph_c0	275	389	297	115	148	114	8.84	14.43	11.85	4.25	5.6	4.27	7.81566e-05	-1.41164	down	--	--	--	--	--	--	NPH3 family;; NPH3 family	BTB/POZ domain-containing protein At3g19850 OS=Arabidopsis thaliana OX=3702 GN=At3g19850 PE=2 SV=1	S	Function unknown	PREDICTED: BTB/POZ domain-containing protein At1g50280 [Daucus carota subsp. sativus]
c87862.graph_c0	105	109	87	30	21	31	3.6	4.19	3.58	1.35	0.83	1.1	0.000201898	-1.82057	down	--	--	--	--	--	--	ZF-HD protein dimerisation region	Zinc-finger homeodomain protein 4 OS=Arabidopsis thaliana OX=3702 GN=ZHD4 PE=1 SV=1	S	Function unknown	PREDICTED: zinc-finger homeodomain protein 4 [Daucus carota subsp. sativus]
c83540.graph_c0	24	25	14	93	222	99	1.39	1.69	0.96	6.56	14.88	6.39	1.33177e-05	2.34625	up	[R]	General function prediction only	Biological Process: protein depalmitoylation (GO:0002084);; Cellular Component: cytoplasm (GO:0005737);; Molecular Function: palmitoyl-(protein) hydrolase activity (GO:0008474);; Molecular Function: carboxylic ester hydrolase activity (GO:0052689);;	K06130|1.17777e-77|spen:107021518|K06130 lysophospholipase II [EC:3.1.1.5] | (RefSeq) acyl-protein thioesterase 2-like	[I]	Lipid transport and metabolism	Phospholipase/Carboxylesterase;; Serine hydrolase (FSH1);; Phospholipase/Carboxylesterase	Probable carboxylesterase Os04g0669500 OS=Oryza sativa subsp. japonica OX=39947 GN=Os04g0669500 PE=3 SV=1	S	Function unknown	PREDICTED: acyl-protein thioesterase 2 [Daucus carota subsp. sativus]
c85584.graph_c0	481	651	411	266	115	128	14.18	21.07	14.33	8.74	3.69	3.82	0.00350291	-1.55143	down	[S]	Function unknown	Molecular Function: catalytic activity (GO:0003824);;	K09955|0|spen:107007236|K09955 uncharacterized protein | (RefSeq) uncharacterized LOC107007236	--	--	Beta-L-arabinofuranosidase, GH127	--	S	Function unknown	PREDICTED: uncharacterized protein LOC108202951 isoform X2 [Daucus carota subsp. sativus]
c84794.graph_c0	1048	1575	834	153	150	177	64.53	100.75	58.33	10.76	9.76	11.02	2.55039e-15	-2.82272	down	[G]	Carbohydrate transport and metabolism	Molecular Function: transporter activity (GO:0005215);; Biological Process: transport (GO:0006810);; Cellular Component: integral component of membrane (GO:0016021);;	K09873|5.19286e-119|mus:103972007|K09873 aquaporin TIP | (RefSeq) probable aquaporin TIP2-1	[G]	Carbohydrate transport and metabolism	Major intrinsic protein	Aquaporin TIP2-3 OS=Arabidopsis thaliana OX=3702 GN=TIP2-3 PE=1 SV=1	G	Carbohydrate transport and metabolism	PREDICTED: probable aquaporin TIP2-2 [Daucus carota subsp. sativus]
c89572.graph_c0	263	340	318	92	86	78	6.01	8.63	8.61	2.51	2.14	2.01	2.08881e-08	-1.87457	down	--	--	Biological Process: proteolysis (GO:0006508);; Molecular Function: peptidase activity (GO:0008233);; Biological Process: cell division (GO:0051301);;	--	--	--	BTB/POZ domain	BTB/POZ domain-containing protein At3g50780 OS=Arabidopsis thaliana OX=3702 GN=At3g50780 PE=2 SV=1	S	Function unknown	PREDICTED: BTB/POZ domain-containing protein At3g50780-like [Daucus carota subsp. sativus]
c91838.graph_c0	59	47	147	275	1464	727	4.26	2.99	8.77	14.08	59.5	29.61	2.89611e-06	2.78142	up	--	--	Biological Process: amino acid transmembrane transport (GO:0003333);; Molecular Function: amino acid transmembrane transporter activity (GO:0015171);; Cellular Component: integral component of membrane (GO:0016021);;	K15015|1.53926e-112|pxb:103951062|K15015 solute carrier family 32 (vesicular inhibitory amino acid transporter) | (RefSeq) vacuolar amino acid transporter 1-like	[E]	Amino acid transport and metabolism	Transmembrane amino acid transporter protein;; Tryptophan/tyrosine permease family;; Transmembrane amino acid transporter protein	Amino acid transporter AVT1J OS=Arabidopsis thaliana OX=3702 GN=AVT1J PE=2 SV=1	E	Amino acid transport and metabolism	PREDICTED: vacuolar amino acid transporter 1 [Daucus carota subsp. sativus]
c86743.graph_c0	53	38	44	13	10	11	3.93	2.65	3.22	1.81	0.98	1.17	0.00417581	-1.83543	down	--	--	Molecular Function: RNA binding (GO:0003723);;	--	[L]	Replication, recombination and repair	CRS1 / YhbY (CRM) domain	Uncharacterized CRM domain-containing protein At3g25440, chloroplastic OS=Arabidopsis thaliana OX=3702 GN=At3g25440 PE=2 SV=1	S	Function unknown	PREDICTED: uncharacterized CRM domain-containing protein At3g25440, chloroplastic [Daucus carota subsp. sativus]
c75561.graph_c0	258	226	146	28	45	12	30.62	28.75	19.97	3.95	5.91	1.52	6.9064e-08	-2.74868	down	--	--	--	--	--	--	--	--	--	--	hypothetical protein DCAR_006347 [Daucus carota subsp. sativus]
c84847.graph_c0	273	338	220	72	78	58	15.55	20.48	14.51	4.99	5.1	3.52	5.34683e-08	-2.01295	down	--	--	--	--	--	--	Plant protein of unknown function (DUF868)	--	S	Function unknown	PREDICTED: uncharacterized protein LOC108197598 [Daucus carota subsp. sativus]
c93045.graph_c0	125	211	151	67	80	55	11.77	21.37	16.32	7.53	8.32	5.54	0.00722241	-1.31011	down	--	--	--	K07964|1.4145e-76|vvi:100255842|K07964 heparanase [EC:3.2.1.166] | (RefSeq) heparanase-like protein 3	--	--	--	Heparanase-like protein 3 OS=Arabidopsis thaliana OX=3702 GN=At5g34940 PE=2 SV=2	G	Carbohydrate transport and metabolism	hypothetical protein DCAR_017772 [Daucus carota subsp. sativus]
c71277.graph_c0	3	5	3	26	46	45	0.34	0.61	0.34	2.61	4.07	4.06	0.000309552	2.68661	up	--	--	Biological Process: flavonoid biosynthetic process (GO:0009813);; Cellular Component: intracellular membrane-bounded organelle (GO:0043231);; Biological Process: flavonoid glucuronidation (GO:0052696);; Molecular Function: quercetin 3-O-glucosyltransferase activity (GO:0080043);; Molecular Function: quercetin 7-O-glucosyltransferase activity (GO:0080044);;	--	[GC]	--	--	UDP-glycosyltransferase 76B1 OS=Arabidopsis thaliana OX=3702 GN=UGT76B1 PE=2 SV=1	S	Function unknown	PREDICTED: UDP-glycosyltransferase 76C2-like isoform X1 [Daucus carota subsp. sativus]
c73822.graph_c0	324	255	347	625	1391	1156	11.51	9.68	14.25	25.13	54.47	43.83	2.34582e-06	1.61235	up	[IQR]	Lipid transport and metabolism ;; Secondary metabolites biosynthesis, transport and catabolism ;; General function prediction only	--	--	[R]	General function prediction only	Enoyl-(Acyl carrier protein) reductase;; short chain dehydrogenase	Secoisolariciresinol dehydrogenase (Fragment) OS=Forsythia intermedia OX=55183 PE=1 SV=1	S	Function unknown	PREDICTED: secoisolariciresinol dehydrogenase-like [Daucus carota subsp. sativus]
c78110.graph_c0	367	288	439	151	153	219	25.45	21.17	35.63	12.51	11.98	16.48	0.00422456	-1.09581	down	[T]	Signal transduction mechanisms	Molecular Function: calcium ion binding (GO:0005509);;	K13448|2.01309e-56|sind:105166570|K13448 calcium-binding protein CML | (RefSeq) calcium-binding allergen Ole e 8-like	[T]	Signal transduction mechanisms	EF hand;; EF-hand domain pair;; EF-hand domain;; EF hand;; EF-hand domain pair;; Secreted protein acidic and rich in cysteine Ca binding region;; EF-hand domain;; Cytoskeletal-regulatory complex EF hand	Calcium-binding allergen Ole e 8 OS=Olea europaea OX=4146 PE=1 SV=1	DTZ	--	PREDICTED: calcium-binding allergen Ole e 8-like [Daucus carota subsp. sativus]
c79237.graph_c0	142	51	60	9	4	4	6.51	2.54	3.19	0.49	0.2	0.2	5.11415e-07	-3.30715	down	--	--	--	--	--	--	--	--	S	Function unknown	PREDICTED: uncharacterized protein LOC108217491 [Daucus carota subsp. sativus]
c78846.graph_c0	108	168	405	14	11	8	9.33	15.69	41.86	1.54	1.24	0.92	1.8214e-11	-3.89021	down	--	--	Cellular Component: cell (GO:0005623);; Molecular Function: electron carrier activity (GO:0009055);; Molecular Function: protein disulfide oxidoreductase activity (GO:0015035);; Biological Process: cell redox homeostasis (GO:0045454);; Biological Process: oxidation-reduction process (GO:0055114);;	K03676|6.07308e-48|nnu:104587597|K03676 glutaredoxin 3 | (RefSeq) monothiol glutaredoxin-S11-like	[O]	Posttranslational modification, protein turnover, chaperones	Glutaredoxin	Glutaredoxin-C13 OS=Arabidopsis thaliana OX=3702 GN=GRXC13 PE=3 SV=1	O	Posttranslational modification, protein turnover, chaperones	PREDICTED: glutaredoxin-C13-like [Daucus carota subsp. sativus]
c91446.graph_c1	335	342	350	119	111	118	13.64	12.99	15.48	6.16	6.11	6.26	2.02345e-08	-1.60464	down	[K]	Transcription	Molecular Function: protein serine/threonine kinase activity (GO:0004674);; Molecular Function: ATP binding (GO:0005524);; Biological Process: protein phosphorylation (GO:0006468);; Cellular Component: integral component of membrane (GO:0016021);; Molecular Function: 2-alkenal reductase [NAD(P)] activity (GO:0032440);; Biological Process: oxidation-reduction process (GO:0055114);;	--	--	--	Protein kinase domain;; Protein tyrosine kinase;; Leucine rich repeat;; Leucine Rich repeats (2 copies);; Leucine Rich Repeat	LRR receptor-like serine/threonine-protein kinase OS=Arabidopsis thaliana OX=3702 GN=RGI3 PE=1 SV=1	S	Function unknown	PREDICTED: probable LRR receptor-like serine/threonine-protein kinase At4g26540 [Daucus carota subsp. sativus]
c80560.graph_c0	79	521	203	13	91	40	10.34	73.45	29.26	1.48	5.96	2.83	0.00725491	-2.19922	down	--	--	Molecular Function: enzyme inhibitor activity (GO:0004857);; Biological Process: negative regulation of catalytic activity (GO:0043086);;	--	--	--	Plant invertase/pectin methylesterase inhibitor	Pectinesterase inhibitor 7 OS=Arabidopsis thaliana OX=3702 GN=PMEI7 PE=2 SV=1	S	Function unknown	PREDICTED: 21 kDa protein-like [Daucus carota subsp. sativus]
c79477.graph_c0	109	338	203	55	27	28	9.95	36.86	21.79	4.55	3.28	3.58	0.000114023	-2.36355	down	--	--	Biological Process: protoporphyrinogen IX biosynthetic process (GO:0006782);; Molecular Function: glutamyl-tRNA reductase activity (GO:0008883);; Molecular Function: NADP binding (GO:0050661);; Biological Process: oxidation-reduction process (GO:0055114);;	K01070|3.31978e-13|egr:104431989|K01070 S-formylglutathione hydrolase [EC:3.1.2.12] | (RefSeq) uncharacterized LOC104431989	--	--	--	Glutamyl-tRNA reductase 1, chloroplastic OS=Cucumis sativus OX=3659 GN=HEMA1 PE=2 SV=1	H	Coenzyme transport and metabolism	PREDICTED: uncharacterized protein LOC108224554 [Daucus carota subsp. sativus]
c87072.graph_c0	653	498	644	1213	1345	1378	34.64	29.56	39.5	77.18	79.07	78.29	1.96426e-06	1.03914	up	--	--	--	--	[T]	Signal transduction mechanisms	--	Serine/threonine-protein kinase AFC2 OS=Arabidopsis thaliana OX=3702 GN=AFC2 PE=1 SV=1	T	Signal transduction mechanisms	PREDICTED: serine/threonine-protein kinase AFC2-like [Daucus carota subsp. sativus]
c79197.graph_c0	808	692	367	157	171	206	45.16	41.56	23.52	10.32	10.41	12.22	6.55674e-06	-1.79988	down	--	--	--	K05759|2.37786e-12|gmx:100799819|K05759 profilin | (RefSeq) profilin-like	[Z]	Cytoskeleton	--	Profilin-3 OS=Corylus avellana OX=13451 PE=1 SV=1	O	Posttranslational modification, protein turnover, chaperones	PREDICTED: profilin-2-like [Lupinus angustifolius]
c78868.graph_c0	114	152	111	223	1008	355	7.09	10.17	7.91	16.45	68.67	23.6	0.00322447	1.72951	up	--	--	--	--	--	--	--	--	--	--	PREDICTED: extensin-3-like [Daucus carota subsp. sativus]
c87715.graph_c0	193	132	202	371	676	431	4.69	3.39	5.59	10.46	17.6	11.24	5.32203e-05	1.34376	up	[IQ]	Lipid transport and metabolism ;; Secondary metabolites biosynthesis, transport and catabolism	Biological Process: metabolic process (GO:0008152);; Molecular Function: o-succinylbenzoate-CoA ligase activity (GO:0008756);;	--	[I]	Lipid transport and metabolism	AMP-binding enzyme;; AMP-binding enzyme C-terminal domain;; AMP-binding enzyme	Probable acyl-activating enzyme 2 OS=Arabidopsis thaliana OX=3702 GN=AAE2 PE=2 SV=1	IQ	--	PREDICTED: probable acyl-activating enzyme 2 [Daucus carota subsp. sativus]
c83334.graph_c0	38	79	70	3	8	11	1.2	2.68	2.53	0.11	0.27	0.37	9.31292e-05	-2.70737	down	--	--	Molecular Function: DNA binding (GO:0003677);;	K09338|0|vvi:100260889|K09338 homeobox-leucine zipper protein | (RefSeq) homeobox-leucine zipper protein ANTHOCYANINLESS 2	--	--	START domain	Homeobox-leucine zipper protein ANTHOCYANINLESS 2 OS=Arabidopsis thaliana OX=3702 GN=ANL2 PE=2 SV=1	K	Transcription	PREDICTED: homeobox-leucine zipper protein ANTHOCYANINLESS 2-like isoform X1 [Daucus carota subsp. sativus]
c86367.graph_c0	323	535	270	28	11	18	10.46	18.73	9.93	1.09	0.38	0.64	2.53358e-16	-3.99676	down	--	--	--	--	--	--	--	Interactor of constitutive active ROPs 4 OS=Arabidopsis thaliana OX=3702 GN=ICR4 PE=1 SV=2	S	Function unknown	PREDICTED: interactor of constitutive active ROPs 4-like [Daucus carota subsp. sativus]
c75164.graph_c0	116	127	129	55	62	45	11.8	13.89	15.06	6.71	6.97	4.9	0.00304456	-1.24093	down	--	--	--	K09284|8.69754e-20|spen:107029492|K09284 AP2-like factor, euAP2 lineage | (RefSeq) ethylene-responsive transcription factor RAP2-7-like	--	--	--	Ethylene-responsive transcription factor RAP2-7 OS=Arabidopsis thaliana OX=3702 GN=RAP2-7 PE=2 SV=2	K	Transcription	PREDICTED: ethylene-responsive transcription factor RAP2-7 [Daucus carota subsp. sativus]
c89733.graph_c0	1930	1155	2286	2958	4783	5721	100.78	64.08	135.9	197.44	279.65	334.38	0.00236213	1.19991	up	[T]	Signal transduction mechanisms	Biological Process: response to stress (GO:0006950);; Molecular Function: hydrolase activity (GO:0016787);;	--	--	--	--	Universal stress protein A-like protein OS=Arabidopsis thaliana OX=3702 GN=At3g01520 PE=1 SV=2	T	Signal transduction mechanisms	PREDICTED: universal stress protein PHOS34 [Daucus carota subsp. sativus]
c72957.graph_c0	39	40	41	87	133	97	3.7	4.08	4.47	9.8	13.95	9.85	0.00722241	1.23148	up	--	--	--	--	--	--	--	--	--	--	PREDICTED: ensconsin-like [Daucus carota subsp. sativus]
c92493.graph_c0	173	140	144	295	426	303	3.2	2.91	3.79	6.01	8.04	5.11	0.000387855	1.04238	up	--	--	--	--	[R]	General function prediction only	PPR repeat family;; PPR repeat;; PPR repeat;; Pentatricopeptide repeat domain;; Pentacotripeptide-repeat region of PRORP;; Mitochondrial 28S ribosomal protein S27	Pentatricopeptide repeat-containing protein At4g01570 OS=Arabidopsis thaliana OX=3702 GN=At4g01570 PE=2 SV=1	S	Function unknown	PREDICTED: pentatricopeptide repeat-containing protein At4g01570 [Daucus carota subsp. sativus]
c79726.graph_c0	4	1	7	52	164	97	0.13	0.03	0.26	2.07	6.19	3.34	7.32448e-09	3.81192	up	--	--	Molecular Function: nucleotide binding (GO:0000166);;	--	[UR]	--	Dynamin GTPase effector domain	Dynamin-related protein 1E OS=Arabidopsis thaliana OX=3702 GN=DRP1E PE=1 SV=1	S	Function unknown	hypothetical protein DCAR_008303 [Daucus carota subsp. sativus]
c77420.graph_c0	5	5	24	39	175	78	0.29	0.31	1.6	2.67	11.18	4.83	0.00346636	2.37754	up	--	--	--	--	--	--	Cotton fibre expressed protein	--	S	Function unknown	PREDICTED: rRNA-processing protein EBP2-like [Daucus carota subsp. sativus]
c89979.graph_c0	240	162	135	47	53	45	6.99	4.18	3.85	1.33	1.38	1.15	1.78266e-06	-1.87583	down	[V]	Defense mechanisms	Molecular Function: ATP binding (GO:0005524);; Cellular Component: plasma membrane (GO:0005886);; Biological Process: stem vascular tissue pattern formation (GO:0010222);; Biological Process: cotyledon vascular tissue pattern formation (GO:0010588);; Cellular Component: integral component of membrane (GO:0016021);; Molecular Function: ATPase activity, coupled to transmembrane movement of substanc…	--	[Q]	Secondary metabolites biosynthesis, transport and catabolism	ABC-2 type transporter;; ABC transporter;; AAA domain, putative AbiEii toxin, Type IV TA system	ABC transporter G family member 14 OS=Arabidopsis thaliana OX=3702 GN=ABCG14 PE=2 SV=1	V	Defense mechanisms	PREDICTED: ABC transporter G family member 14-like [Daucus carota subsp. sativus]
c68282.graph_c0	1180	580	972	2017	1646	2395	92.25	48.68	87.08	186.63	141.4	199.73	0.00622161	1.06269	up	--	--	Biological Process: negative regulation of peptidase activity (GO:0010466);; Molecular Function: peptidase inhibitor activity (GO:0030414);;	--	--	--	Aspartic acid proteinase inhibitor;; Cystatin domain	Cysteine proteinase inhibitor 6 OS=Arabidopsis thaliana OX=3702 GN=CYS6 PE=1 SV=2	O	Posttranslational modification, protein turnover, chaperones	PREDICTED: cysteine proteinase inhibitor A [Daucus carota subsp. sativus]
c92785.graph_c1	164	177	213	491	532	529	7.62	8.84	11.34	26.84	26.96	26.21	7.67113e-07	1.36418	up	--	--	Molecular Function: nucleotide binding (GO:0000166);; Molecular Function: nucleic acid binding (GO:0003676);; Biological Process: mRNA processing (GO:0006397);;	K12822|1.29083e-72|nnu:104590867|K12822 RNA-binding protein 25 | (RefSeq) RNA-binding protein 25	[A]	RNA processing and modification	PWI domain	--	S	Function unknown	PREDICTED: RNA-binding protein 25-like isoform X3 [Daucus carota subsp. sativus]
c91404.graph_c0	39	23	28	93	133	71	1.54	0.9	1.16	3.82	4.59	2.59	0.00326759	1.52013	up	--	--	--	--	[R]	General function prediction only	Zinc finger, C2H2 type;; Zinc-finger double-stranded RNA-binding	Protein indeterminate-domain 1 OS=Arabidopsis thaliana OX=3702 GN=IDD1 PE=1 SV=1	S	Function unknown	PREDICTED: protein indeterminate-domain 2-like [Daucus carota subsp. sativus]
c84377.graph_c0	165	120	139	49	78	64	6.97	5.08	7.1	2.04	3.4	2.86	0.00238733	-1.19437	down	--	--	Biological Process: single-organism process (GO:0044699);;	--	[U]	Intracellular trafficking, secretion, and vesicular transport	--	Type I inositol polyphosphate 5-phosphatase 2 OS=Arabidopsis thaliana OX=3702 GN=IP5P2 PE=1 SV=2	T	Signal transduction mechanisms	PREDICTED: type I inositol polyphosphate 5-phosphatase 2-like [Daucus carota subsp. sativus]
c67479.graph_c0	150	87	56	33	6	13	17.88	12.25	7.54	4.83	0.79	1.67	0.00760871	-2.08916	down	--	--	--	--	--	--	--	Protein LOL1 OS=Arabidopsis thaliana OX=3702 GN=LOL1 PE=2 SV=1	S	Function unknown	hypothetical protein LSAT_6X78520 [Lactuca sativa]
c73927.graph_c0	1	1	1	20	164	29	0.05	0.06	0.06	1.22	9.3	1.7	3.45669e-06	3.90512	up	--	--	--	--	--	--	Helix-loop-helix DNA-binding domain	Basic helix-loop-helix protein A OS=Pisum sativum OX=3888 GN=BHLH PE=3 SV=1	K	Transcription	PREDICTED: basic helix-loop-helix protein A isoform X1 [Daucus carota subsp. sativus]
c82871.graph_c0	163	69	184	463	416	487	23.36	10.79	30.24	79.64	67.16	75.42	0.00026533	1.57841	up	--	--	--	--	--	--	Protein tyrosine kinase;; Domain of unknown function (DUF3403);; Protein kinase domain	G-type lectin S-receptor-like serine/threonine-protein kinase At4g27290 OS=Arabidopsis thaliana OX=3702 GN=At4g27290 PE=3 SV=4	T	Signal transduction mechanisms	PREDICTED: uncharacterized protein LOC108221773 [Daucus carota subsp. sativus]
c92740.graph_c0	41345	60666	37220	17648	8988	11994	1033.7	1645.35	1072.6	518.77	243.53	316.05	1.36358e-05	-1.82727	down	[ET]	Amino acid transport and metabolism ;; Signal transduction mechanisms	Molecular Function: G-protein coupled receptor activity (GO:0004930);; Molecular Function: ionotropic glutamate receptor activity (GO:0004970);; Molecular Function: calcium channel activity (GO:0005262);; Biological Process: G-protein coupled receptor signaling pathway (GO:0007186);; Biological Process: response to wounding (GO:0009611);; Biological Process: gravitropism (GO:0009630);; Biological…	K05387|0|vvi:100258104|K05387 glutamate receptor, ionotropic, plant | (RefSeq) glutamate receptor 3.3	[PET]	--	Receptor family ligand binding region;; Periplasmic binding protein;; Ligated ion channel L-glutamate- and glycine-binding site;; Bacterial extracellular solute-binding proteins, family 3;; Ligand-gated ion channel;; Ligand-gated ion channel;; Bacterial extracellular solute-binding proteins, family 3	Glutamate receptor 3.3 OS=Arabidopsis thaliana OX=3702 GN=GLR3.3 PE=2 SV=1	U	Intracellular trafficking, secretion, and vesicular transport	PREDICTED: glutamate receptor 3.3-like isoform X1 [Daucus carota subsp. sativus]
c91974.graph_c0	204	891	407	118	211	117	5.55	29.24	13.75	3.85	7.35	3.59	0.00767719	-1.72457	down	[N]	Cell motility	Cellular Component: integral component of membrane (GO:0016021);;	K13680|0|sly:101246437|K13680 beta-mannan synthase [EC:2.4.1.32] | (RefSeq) glucomannan 4-beta-mannosyltransferase 2-like	--	--	Glycosyltransferase like family 2;; Glycosyl transferase family group 2;; Glycosyl transferase family 2;; Glycosyl transferase family 21	Glucomannan 4-beta-mannosyltransferase 2 OS=Arabidopsis thaliana OX=3702 GN=CSLA2 PE=2 SV=1	M	Cell wall/membrane/envelope biogenesis	PREDICTED: glucomannan 4-beta-mannosyltransferase 2-like [Daucus carota subsp. sativus]
c92262.graph_c0	79949	127565	73707	42835	21966	37892	2922.85	5031.37	3085.75	1787.02	819.05	1424.61	0.00197969	-1.44857	down	--	--	Biological Process: response to light stimulus (GO:0009416);; Cellular Component: photosystem I (GO:0009522);; Cellular Component: photosystem II (GO:0009523);; Cellular Component: chloroplast thylakoid membrane (GO:0009535);; Biological Process: photosynthesis, light harvesting in photosystem I (GO:0009768);; Cellular Component: chloroplast envelope (GO:0009941);; Cellular Component: plastoglobu…	K08908|1.29429e-137|vvi:100266036|K08908 light-harvesting complex I chlorophyll a/b binding protein 2 | (RefSeq) chlorophyll a-b binding protein, chloroplastic	--	--	Chlorophyll A-B binding protein	Chlorophyll a-b binding protein, chloroplastic OS=Petunia hybrida OX=4102 PE=2 SV=1	S	Function unknown	PREDICTED: chlorophyll a-b binding protein 7, chloroplastic [Daucus carota subsp. sativus]
c90864.graph_c0	1558	1803	1446	659	426	532	23.07	29	24.42	11.78	7.06	8.47	2.54782e-06	-1.59194	down	[J]	Translation, ribosomal structure and biogenesis	--	--	[R]	General function prediction only	PPR repeat family;; PPR repeat;; PPR repeat;; Pentatricopeptide repeat domain;; Pentacotripeptide-repeat region of PRORP;; Acetyltransferase (GNAT) domain;; Acetyltransferase (GNAT) domain;; Acetyltransferase (GNAT) family;; FR47-like protein	Pentatricopeptide repeat-containing protein At1g08070, chloroplastic OS=Arabidopsis thaliana OX=3702 GN=PCMP-H12 PE=2 SV=1	S	Function unknown	PREDICTED: pentatricopeptide repeat-containing protein At1g08070, chloroplastic [Daucus carota subsp. sativus]
c89255.graph_c0	1573	2330	1452	994	737	790	100.67	159.44	109.12	68.85	48.83	50.71	0.00544469	-1.13449	down	[G]	Carbohydrate transport and metabolism	Cellular Component: extracellular region (GO:0005576);; Cellular Component: cell wall (GO:0005618);; Cellular Component: plasmodesma (GO:0009506);; Biological Process: plasmodesmata-mediated intercellular transport (GO:0010497);; Molecular Function: manganese ion binding (GO:0030145);; Biological Process: oxalate metabolic process (GO:0033609);; Molecular Function: nutrient reservoir activity (GO…	--	--	--	Cupin;; Cupin domain;; PsbP	Germin-like protein subfamily 2 member 4 OS=Arabidopsis thaliana OX=3702 GN=GLP10 PE=2 SV=1	S	Function unknown	PREDICTED: germin-like protein subfamily 2 member 2 [Daucus carota subsp. sativus]
c89713.graph_c0	2104	1562	1627	863	726	829	96.1	79.24	80.29	53.73	40.03	50.36	6.79571e-06	-1.17416	down	--	--	--	--	--	--	Syntaxin 6, N-terminal;; Myb/SANT-like DNA-binding domain	Trihelix transcription factor ASIL2 OS=Arabidopsis thaliana OX=3702 GN=ASIL2 PE=1 SV=1	S	Function unknown	PREDICTED: uncharacterized protein LOC108192951 [Daucus carota subsp. sativus]
c78923.graph_c0	140	121	132	38	70	35	10.21	9.47	11.01	3.28	5.61	2.73	0.000751015	-1.48782	down	--	--	Molecular Function: diacylglycerol kinase activity (GO:0004143);; Molecular Function: ATP binding (GO:0005524);; Biological Process: protein kinase C-activating G-protein coupled receptor signaling pathway (GO:0007205);; Biological Process: phosphorylation (GO:0016310);;	K00901|5.05291e-78|sly:101264835|K00901 diacylglycerol kinase (ATP) [EC:2.7.1.107] | (RefSeq) diacylglycerol kinase 7	[IT]	--	Diacylglycerol kinase catalytic domain	Diacylglycerol kinase 7 OS=Arabidopsis thaliana OX=3702 GN=DGK7 PE=1 SV=1	I	Lipid transport and metabolism	PREDICTED: diacylglycerol kinase 7 [Daucus carota subsp. sativus]
c77391.graph_c0	5	1	3	25	137	53	0.27	0.06	0.19	1.6	8.19	3.08	9.57711e-06	3.41349	up	[T]	Signal transduction mechanisms	Cellular Component: integral component of membrane (GO:0016021);;	K17991|1.12989e-96|mtr:MTR_1g032190|K17991 peroxygenase [EC:1.11.2.3] | (RefSeq) calcium ion-binding protein	--	--	Caleosin related protein	Probable peroxygenase 4 OS=Arabidopsis thaliana OX=3702 GN=PXG4 PE=1 SV=1	S	Function unknown	hypothetical protein DCAR_030259 [Daucus carota subsp. sativus]
c89220.graph_c0	6312	4283	4699	2836	1543	1895	133.58	98.8	115.77	74.24	39.2	46.39	0.00087226	-1.28088	down	--	--	--	--	--	--	NPH3 family;; BTB/POZ domain	BTB/POZ domain-containing protein SR1IP1 OS=Arabidopsis thaliana OX=3702 GN=SR1IP1 PE=1 SV=2	S	Function unknown	PREDICTED: BTB/POZ domain-containing protein At5g67385-like [Daucus carota subsp. sativus]
c65377.graph_c0	487	331	226	28	7	28	17.62	12.87	9.37	1.19	0.28	1.08	8.57505e-12	-3.65601	down	--	--	--	--	--	--	PB1 domain	--	S	Function unknown	PREDICTED: uncharacterized protein LOC108215197 [Daucus carota subsp. sativus]
c78837.graph_c0	152	90	115	185	437	329	6.44	4.25	6.31	10.21	22.4	16.15	0.00476813	1.25071	up	--	--	Molecular Function: voltage-gated chloride channel activity (GO:0005247);; Biological Process: chloride transport (GO:0006821);; Cellular Component: integral component of membrane (GO:0016021);; Biological Process: regulation of anion transmembrane transport (GO:1903959);;	K05016|2.71613e-123|pda:103704786|K05016 chloride channel 7 | (RefSeq) chloride channel protein CLC-c-like	[P]	Inorganic ion transport and metabolism	Voltage gated chloride channel;; CBS domain	Chloride channel protein CLC-c OS=Arabidopsis thaliana OX=3702 GN=CLC-C PE=1 SV=1	P	Inorganic ion transport and metabolism	hypothetical protein DCAR_022280 [Daucus carota subsp. sativus]
c79139.graph_c0	25255	34970	21066	13719	8836	12259	2135.32	3200.05	2056.95	1333.36	812.77	1078.87	0.00230962	-1.25279	down	--	--	Cellular Component: chloroplast (GO:0009507);; Cellular Component: photosystem II (GO:0009523);; Biological Process: photosynthesis (GO:0015979);; Cellular Component: integral component of membrane (GO:0016021);;	K02721|1.15278e-34|mtr:MTR_7g096150|K02721 photosystem II PsbW protein | (RefSeq) photosystem II reaction center W	--	--	Photosystem II reaction centre W protein (PsbW)	Photosystem II reaction center W protein, chloroplastic OS=Spinacia oleracea OX=3562 GN=psbW PE=1 SV=1	S	Function unknown	PREDICTED: photosystem II reaction center W protein, chloroplastic-like [Daucus carota subsp. sativus]
c91121.graph_c0	236	442	369	166	158	136	6.13	12.45	10.79	5.23	4.73	3.76	0.00654379	-1.23302	down	--	--	--	--	--	--	Protein of unknown function (DUF632);; Protein of unknown function (DUF630)	Nitrate regulatory gene2 protein OS=Arabidopsis thaliana OX=3702 GN=NRG2 PE=1 SV=1	S	Function unknown	PREDICTED: uncharacterized protein LOC108202557 [Daucus carota subsp. sativus]
c82900.graph_c0	5536	7753	5413	3323	2701	3093	212.83	319.19	237.76	150.02	112.61	125.67	0.00197198	-1.09499	down	[I]	Lipid transport and metabolism	Biological Process: lipid metabolic process (GO:0006629);; Cellular Component: integral component of membrane (GO:0016021);; Molecular Function: oxidoreductase activity, acting on paired donors, with oxidation of a pair of donors resulting in the reduction of molecular oxygen to two molecules of water (GO:0016717);; Biological Process: oxidation-reduction process (GO:0055114);;	K10257|0|vvi:100260414|K10257 acyl-lipid omega-3 desaturase [EC:1.14.19.25 1.14.19.35 1.14.19.36] | (RefSeq) omega-3 fatty acid desaturase, chloroplastic	--	--	Domain of unknown function (DUF3474);; Fatty acid desaturase	Omega-3 fatty acid desaturase, chloroplastic OS=Ricinus communis OX=3988 GN=FAD7A-1 PE=2 SV=1	I	Lipid transport and metabolism	omega-3 fatty acid desaturase [Petroselinum crispum]
c90365.graph_c0	631	619	388	221	147	137	16.29	16.79	11.56	6.62	4.07	3.65	3.18893e-05	-1.68825	down	--	--	--	--	--	--	Weak chloroplast movement under blue light	Protein PLASTID MOVEMENT IMPAIRED 2 OS=Arabidopsis thaliana OX=3702 GN=PMI2 PE=1 SV=1	S	Function unknown	PREDICTED: protein PLASTID MOVEMENT IMPAIRED 2-like isoform X1 [Daucus carota subsp. sativus]
c87963.graph_c0	292	201	689	1167	2881	2014	7.37	5.38	19.18	32.69	75.16	50.89	4.1332e-05	2.07973	up	[P]	Inorganic ion transport and metabolism	Molecular Function: transporter activity (GO:0005215);; Cellular Component: integral component of membrane (GO:0016021);; Biological Process: anion transmembrane transport (GO:0098656);;	--	[P]	Inorganic ion transport and metabolism	Citrate transporter;; Bacterial Na+/H+ antiporter B (NhaB);; Citrate transporter	Silicon efflux transporter LSI3 OS=Oryza sativa subsp. japonica OX=39947 GN=LSI3 PE=2 SV=1	P	Inorganic ion transport and metabolism	PREDICTED: putative transporter arsB [Daucus carota subsp. sativus]
c83729.graph_c0	58	54	92	17	22	25	2.19	2.19	3.98	0.76	0.91	1	0.00622161	-1.60714	down	[E]	Amino acid transport and metabolism	Molecular Function: sarcosine oxidase activity (GO:0008115);; Biological Process: tetrahydrofolate metabolic process (GO:0046653);; Biological Process: oxidation-reduction process (GO:0055114);;	K00306|0|pop:POPTR_0018s03430g|K00306 sarcosine oxidase / L-pipecolate oxidase [EC:1.5.3.1 1.5.3.7] | (RefSeq) POPTRDRAFT_578371; putative sarcosine oxidase family protein	[R]	General function prediction only	FAD dependent oxidoreductase;; Glucose inhibited division protein A;; FAD dependent oxidoreductase;; FAD binding domain;; NAD(P)-binding Rossmann-like domain	Probable sarcosine oxidase OS=Arabidopsis thaliana OX=3702 GN=At2g24580 PE=2 SV=1	E	Amino acid transport and metabolism	PREDICTED: probable sarcosine oxidase [Daucus carota subsp. sativus]
c82221.graph_c0	307	586	318	177	177	137	11.45	23.62	13.86	7.88	7.47	5.41	0.00491455	-1.34344	down	[G]	Carbohydrate transport and metabolism	Cellular Component: cytosol (GO:0005829);; Cellular Component: chloroplast (GO:0009507);; Biological Process: dephosphorylation (GO:0016311);; Molecular Function: phosphatase activity (GO:0016791);;	K15634|0|jcu:105637366|K15634 probable phosphoglycerate mutase [EC:5.4.2.12] | (RefSeq) probable 2-carboxy-D-arabinitol-1-phosphatase	[G]	Carbohydrate transport and metabolism	Histidine phosphatase superfamily (branch 1)	2-carboxy-D-arabinitol-1-phosphatase OS=Triticum aestivum OX=4565 PE=1 SV=1	G	Carbohydrate transport and metabolism	PREDICTED: LOW QUALITY PROTEIN: probable 2-carboxy-D-arabinitol-1-phosphatase [Daucus carota subsp. sativus]
c38365.graph_c1	36	85	107	161	333	363	4.59	11.66	15.68	24.5	47.29	49.71	0.00665484	1.62419	up	--	--	--	--	--	--	--	--	--	--	PREDICTED: classical arabinogalactan protein 10-like [Daucus carota subsp. sativus]
c91420.graph_c0	562	730	451	324	293	237	44.96	57.87	40.13	27.6	25.57	18.11	0.00722241	-1.0863	down	--	--	--	--	--	--	--	--	S	Function unknown	PREDICTED: uncharacterized protein LOC108216154 [Daucus carota subsp. sativus]
c83506.graph_c2	109	55	94	227	473	238	2.21	1.24	2.12	5.57	10.33	5.1	0.000111589	1.6684	up	--	--	--	--	[R]	General function prediction only	Reverse transcriptase (RNA-dependent DNA polymerase);; Reverse transcriptase (RNA-dependent DNA polymerase)	Retrovirus-related Pol polyprotein from transposon RE1 OS=Arabidopsis thaliana OX=3702 GN=RE1 PE=2 SV=1	S	Function unknown	PREDICTED: uncharacterized protein LOC108206706 [Daucus carota subsp. sativus]
c71166.graph_c0	316	459	268	128	146	106	27.18	42.45	26.45	13.08	13.84	9.75	0.000207868	-1.50078	down	--	--	Cellular Component: integral component of membrane (GO:0016021);;	--	--	--	--	--	S	Function unknown	PREDICTED: uncharacterized protein LOC108207975 [Daucus carota subsp. sativus]
c93084.graph_c0	5155	4233	4261	2334	1967	1689	61.48	50.73	56.21	32.39	24.77	21.43	1.67512e-06	-1.23798	down	[R]	General function prediction only	--	K03255|0|tcc:TCM_038439|K03255 protein TIF31 | (RefSeq) Tetratricopeptide repeat (TPR)-like superfamily protein isoform 1	[R]	General function prediction only	Tetratricopeptide repeat;; Tetratricopeptide repeat;; Translation initiation factor eIF3 subunit 135;; Mitochondrial function, CLU-N-term;; Adenosylmethionine decarboxylase	Protein TSS OS=Arabidopsis thaliana OX=3702 GN=TSS PE=1 SV=1	S	Function unknown	PREDICTED: protein TSS [Daucus carota subsp. sativus]
c84093.graph_c0	377	493	469	959	1321	977	8.56	11.9	12.23	25.8	32.84	23.79	8.23638e-05	1.14245	up	--	--	--	--	[R]	General function prediction only	PPR repeat family;; PPR repeat;; PPR repeat;; PPR repeat family;; Pentatricopeptide repeat domain;; PPR repeat;; PPR repeat	Pentatricopeptide repeat-containing protein At5g10690 OS=Arabidopsis thaliana OX=3702 GN=CBSPPR1 PE=2 SV=1	S	Function unknown	hypothetical protein DCAR_003023 [Daucus carota subsp. sativus]
c81871.graph_c0	173	69	195	267	584	630	14.05	5.97	18.38	24.93	50.25	52.69	0.00318481	1.56407	up	--	--	--	--	--	--	--	F-box protein At1g61340 OS=Arabidopsis thaliana OX=3702 GN=At1g61340 PE=2 SV=1	S	Function unknown	PREDICTED: F-box protein At1g61340-like [Daucus carota subsp. sativus]
c80156.graph_c0	32	30	41	4	9	6	2.81	3.01	4.77	0.59	0.67	0.67	0.00345307	-2.15369	down	--	--	Cellular Component: intracellular (GO:0005622);; Biological Process: intracellular protein transport (GO:0006886);;	--	[U]	Intracellular trafficking, secretion, and vesicular transport	VHS domain	TOM1-like protein 3 OS=Arabidopsis thaliana OX=3702 GN=TOL3 PE=1 SV=1	S	Function unknown	PREDICTED: mediator of DNA damage checkpoint protein 1-like isoform X2 [Daucus carota subsp. sativus]
c90599.graph_c0	70	50	60	7	18	11	1.44	1.1	1.41	0.17	0.4	0.24	0.000226254	-2.17584	down	[M]	Cell wall/membrane/envelope biogenesis	Molecular Function: binding (GO:0005488);; Biological Process: cellular process (GO:0009987);; Molecular Function: kinase activity (GO:0016301);;	K04733|0|gra:105765969|K04733 interleukin-1 receptor-associated kinase 4 [EC:2.7.11.1] | (RefSeq) putative receptor protein kinase ZmPK1	--	--	D-mannose binding lectin;; Protein kinase domain;; S-locus glycoprotein domain;; Protein tyrosine kinase;; Protein kinase domain;; Protein tyrosine kinase	Putative receptor protein kinase ZmPK1 OS=Zea mays OX=4577 GN=PK1 PE=2 SV=2	T	Signal transduction mechanisms	PREDICTED: putative receptor protein kinase ZmPK1 [Daucus carota subsp. sativus]
c79581.graph_c0	9	5	6	37	329	94	0.37	0.22	0.29	1.81	14.97	4.21	1.06178e-06	3.5124	up	[T]	Signal transduction mechanisms	Molecular Function: nucleotide binding (GO:0000166);; Molecular Function: signal transducer, downstream of receptor, with serine/threonine kinase activity (GO:0004702);; Cellular Component: cytoplasm (GO:0005737);; Biological Process: protein phosphorylation (GO:0006468);;	--	[T]	Signal transduction mechanisms	Protein kinase domain;; Protein tyrosine kinase	Mitogen-activated protein kinase kinase kinase 18 OS=Arabidopsis thaliana OX=3702 GN=MAPKKK18 PE=1 SV=1	T	Signal transduction mechanisms	PREDICTED: mitogen-activated protein kinase kinase kinase A-like [Daucus carota subsp. sativus]
c87994.graph_c0	596	519	458	959	1569	1008	14.24	13.93	13.03	26.98	40.21	25.98	0.000269518	1.03783	up	[C]	Energy production and conversion	Molecular Function: oxidoreductase activity, acting on the aldehyde or oxo group of donors, NAD or NADP as acceptor (GO:0016620);; Biological Process: oxidation-reduction process (GO:0055114);;	K12355|0|nnu:104595225|K12355 coniferyl-aldehyde dehydrogenase [EC:1.2.1.68] | (RefSeq) aldehyde dehydrogenase family 2 member C4-like	[C]	Energy production and conversion	Aldehyde dehydrogenase family	Aldehyde dehydrogenase family 2 member C4 OS=Arabidopsis thaliana OX=3702 GN=ALDH2C4 PE=1 SV=2	C	Energy production and conversion	PREDICTED: aldehyde dehydrogenase family 2 member C4-like [Daucus carota subsp. sativus]
c88377.graph_c0	134	178	102	369	456	373	3.24	4.73	2.81	10.47	12.15	9.87	0.000312273	1.36574	up	--	--	Biological Process: protein N-linked glycosylation (GO:0006487);; Cellular Component: integral component of membrane (GO:0016021);; Biological Process: N-glycan fucosylation (GO:0036071);; Molecular Function: alpha-(1->6)-fucosyltransferase activity (GO:0046921);;	--	--	--	--	--	S	Function unknown	PREDICTED: uncharacterized protein LOC108203128 [Daucus carota subsp. sativus]
c81480.graph_c0	208	152	383	467	968	829	8.5	6.81	17.05	22.18	42.03	36.34	0.00296403	1.42241	up	[F]	Nucleotide transport and metabolism	Cellular Component: cytosol (GO:0005829);; Biological Process: purine nucleoside catabolic process (GO:0006152);; Biological Process: uridine catabolic process (GO:0006218);; Molecular Function: uridine nucleosidase activity (GO:0045437);; Molecular Function: adenosine nucleosidase activity (GO:0047622);; Molecular Function: inosine nucleosidase activity (GO:0047724);; Molecular Function: xanthos…	K01240|2.65563e-149|jcu:105629478|K01240 uridine nucleosidase [EC:3.2.2.3] | (RefSeq) uridine nucleosidase 1	[F]	Nucleotide transport and metabolism	Inosine-uridine preferring nucleoside hydrolase	Uridine nucleosidase 1 OS=Arabidopsis thaliana OX=3702 GN=URH1 PE=1 SV=2	F	Nucleotide transport and metabolism	PREDICTED: uridine nucleosidase 1 [Daucus carota subsp. sativus]
c90737.graph_c0	720	882	575	176	72	249	87.1	116.08	82.58	26.26	9.8	33.04	0.000159353	-2.01215	down	--	--	--	K14488|6.65173e-35|fve:101300449|K14488 SAUR family protein | (RefSeq) auxin-induced protein 15A-like	--	--	Auxin responsive protein	Auxin-responsive protein SAUR22 OS=Arabidopsis thaliana OX=3702 GN=SAUR22 PE=2 SV=1	S	Function unknown	PREDICTED: auxin-responsive protein SAUR21-like [Daucus carota subsp. sativus]
c92816.graph_c0	2936	4028	2882	1614	1457	1454	114.74	182.94	124.98	63.86	40.53	46.69	0.000226967	-1.1858	down	--	--	Cellular Component: cytosol (GO:0005829);; Biological Process: chloroplast avoidance movement (GO:0009903);; Biological Process: chloroplast accumulation movement (GO:0009904);;	--	--	--	Weak chloroplast movement under blue light	Protein WEAK CHLOROPLAST MOVEMENT UNDER BLUE LIGHT 1 OS=Arabidopsis thaliana OX=3702 GN=WEB1 PE=1 SV=1	S	Function unknown	PREDICTED: protein WEAK CHLOROPLAST MOVEMENT UNDER BLUE LIGHT 1-like [Daucus carota subsp. sativus]
c84615.graph_c0	4136	6124	3428	1775	667	1436	309.06	493.03	293.21	155.9	54.33	114.96	0.000578968	-1.75373	down	--	--	Molecular Function: monooxygenase activity (GO:0004497);; Cellular Component: chloroplast (GO:0009507);; Biological Process: photorespiration (GO:0009853);; Molecular Function: ribulose-bisphosphate carboxylase activity (GO:0016984);; Biological Process: reductive pentose-phosphate cycle (GO:0019253);; Biological Process: oxidation-reduction process (GO:0055114);;	K01602|2.48264e-22|gra:105800954|K01602 ribulose-bisphosphate carboxylase small chain [EC:4.1.1.39] | (RefSeq) ribulose bisphosphate carboxylase small chain, chloroplastic	--	--	Ribulose-1,5-bisphosphate carboxylase small subunit	Ribulose bisphosphate carboxylase small chain, chloroplastic OS=Fagus crenata OX=28929 GN=RBCS1 PE=2 SV=1	C	Energy production and conversion	PREDICTED: ribulose bisphosphate carboxylase small chain 1B, chloroplastic-like [Daucus carota subsp. sativus]
c89193.graph_c0	1459	692	1615	2985	3448	3944	28.83	14.63	36.7	69.52	73.85	83.61	0.00026894	1.34927	up	--	--	--	K17987|1.30272e-170|cic:CICLE_v10024152mg|K17987 next to BRCA1 gene 1 protein | (RefSeq) hypothetical protein	[S]	Function unknown	Ig-like domain from next to BRCA1 gene;; PB1 domain;; Zinc finger, ZZ type	Protein NBR1 homolog OS=Arabidopsis thaliana OX=3702 GN=NBR1 PE=1 SV=1	S	Function unknown	PREDICTED: protein NBR1 homolog [Daucus carota subsp. sativus]
c89536.graph_c0	73	57	84	189	215	152	2.1	1.77	2.78	6.41	6.75	4.66	0.00100058	1.24335	up	[R]	General function prediction only	--	K14546|0|pmum:103323078|K14546 U3 small nucleolar RNA-associated protein 5 | (RefSeq) uncharacterized LOC103323078	[R]	General function prediction only	WD domain, G-beta repeat;; Dip2/Utp12 Family;; Anaphase-promoting complex subunit 4 WD40 domain;; PQQ enzyme repeat	--	S	Function unknown	PREDICTED: WD repeat-containing protein 43 [Daucus carota subsp. sativus]
c38587.graph_c0	33	58	20	3	0	1	6.21	11.73	4.33	0.68	0	0.2	0.000107441	-3.33469	down	--	--	--	K14484|3.56313e-06|rcu:8280180|K14484 auxin-responsive protein IAA | (RefSeq) auxin-responsive protein IAA4	--	--	--	Auxin-induced protein IAA4 OS=Pisum sativum OX=3888 GN=IAA4/5 PE=1 SV=1	--	--	--
c86072.graph_c1	56851	50027	38393	12054	5082	8178	2646.54	2516.89	2053	689.92	288.84	440.25	1.37796e-09	-2.43312	down	--	--	--	K09286|2.48249e-64|pxb:103930679|K09286 EREBP-like factor | (RefSeq) ethylene-responsive transcription factor RAP2-12-like	--	--	--	Ethylene-responsive transcription factor 1 OS=Oryza sativa subsp. japonica OX=39947 GN=EREBP1 PE=1 SV=1	K	Transcription	ethylene response factor [Apium graveolens]
c87803.graph_c0	542	379	1385	2404	7959	7023	12.45	11.25	38.25	68.92	205.2	181.57	3.33943e-06	2.54136	up	[IQ]	Lipid transport and metabolism ;; Secondary metabolites biosynthesis, transport and catabolism	Biological Process: metabolic process (GO:0008152);; Cellular Component: integral component of membrane (GO:0016021);; Molecular Function: ligase activity (GO:0016874);;	K10526|0|tcc:TCM_034347|K10526 OPC-8:0 CoA ligase 1 [EC:6.2.1.-] | (RefSeq) OPC-8:0 CoA ligase1 isoform 1	[I]	Lipid transport and metabolism	AMP-binding enzyme;; AMP-binding enzyme C-terminal domain	4-coumarate--CoA ligase-like 5 OS=Arabidopsis thaliana OX=3702 GN=4CLL5 PE=1 SV=2	IQ	--	PREDICTED: 4-coumarate--CoA ligase-like 5 [Daucus carota subsp. sativus]
c87458.graph_c0	189	251	177	82	56	66	5.18	7.82	5.1	2.69	2.08	2.32	0.00029421	-1.59363	down	[K]	Transcription	Molecular Function: protein serine/threonine kinase activity (GO:0004674);; Molecular Function: ATP binding (GO:0005524);; Biological Process: protein phosphorylation (GO:0006468);; Cellular Component: integral component of membrane (GO:0016021);; Molecular Function: oxidoreductase activity (GO:0016491);; Biological Process: oxidation-reduction process (GO:0055114);;	--	--	--	Leucine rich repeat;; Protein kinase domain;; Protein tyrosine kinase;; Leucine Rich repeats (2 copies);; Leucine rich repeat N-terminal domain;; Leucine Rich Repeat;; Leucine Rich repeat	Receptor-like protein kinase HSL1 OS=Arabidopsis thaliana OX=3702 GN=HSL1 PE=2 SV=1	S	Function unknown	PREDICTED: receptor-like protein kinase HSL1 [Daucus carota subsp. sativus]
c85160.graph_c0	42	42	128	656	1325	730	1.74	1.29	4.24	19.4	38.4	21.54	7.47018e-12	3.27598	up	--	--	--	K09419|1.86305e-46|cmo:103492645|K09419 heat shock transcription factor, other eukaryote | (RefSeq) heat stress transcription factor A-6b-like	[K]	Transcription	HSF-type DNA-binding	Heat stress transcription factor A-2b OS=Oryza sativa subsp. japonica OX=39947 GN=HSFA2B PE=2 SV=1	K	Transcription	PREDICTED: heat stress transcription factor A-6b-like [Daucus carota subsp. sativus]
c71611.graph_c0	42	35	55	86	275	168	6.83	6.12	10.04	15.69	47.33	26.81	0.00140373	1.73047	up	--	--	--	--	--	--	--	Auxin-responsive protein IAA6 OS=Arabidopsis thaliana OX=3702 GN=IAA6 PE=1 SV=2	--	--	PREDICTED: auxin-responsive protein IAA1-like [Daucus carota subsp. sativus]
c88347.graph_c0	614	447	333	121	75	90	22.5	17.75	13.83	5	2.84	3.21	1.14927e-08	-2.22851	down	[R]	General function prediction only	--	K10143|7.77991e-161|cic:CICLE_v10005222mg|K10143 E3 ubiquitin-protein ligase RFWD2 [EC:2.3.2.27] | (RefSeq) hypothetical protein	--	--	WD domain, G-beta repeat	WD repeat-containing protein RUP2 OS=Arabidopsis thaliana OX=3702 GN=RUP2 PE=1 SV=1	S	Function unknown	PREDICTED: WD repeat-containing protein RUP2 isoform X1 [Daucus carota subsp. sativus]
c91451.graph_c0	61	95	87	18	13	12	5.38	9.08	8.6	1.96	1.22	1.12	2.34535e-05	-2.34523	down	--	--	Molecular Function: transferase activity (GO:0016740);;	--	[GC]	--	--	UDP-glycosyltransferase 76E11 OS=Arabidopsis thaliana OX=3702 GN=UGT76E11 PE=2 SV=1	S	Function unknown	PREDICTED: uncharacterized protein LOC108207467 [Daucus carota subsp. sativus]
c85463.graph_c0	71	262	109	25	9	17	1.88	7.39	3.28	0.75	0.25	0.48	7.35604e-05	-2.72673	down	--	--	Cellular Component: membrane (GO:0016020);; Molecular Function: transferase activity (GO:0016740);;	--	[S]	Function unknown	Protein of unknown function (DUF563)	--	S	Function unknown	PREDICTED: uncharacterized protein LOC108224649 [Daucus carota subsp. sativus]
c86683.graph_c0	458	207	791	1954	6134	3293	9.19	4.45	18.29	45.89	133.49	70.06	2.37657e-07	2.61917	up	--	--	--	--	--	--	GDSL-like Lipase/Acylhydrolase	GDSL esterase/lipase At4g16230 OS=Arabidopsis thaliana OX=3702 GN=At4g16230 PE=3 SV=2	S	Function unknown	PREDICTED: GDSL esterase/lipase At5g55050-like [Fragaria vesca subsp. vesca]
c82832.graph_c0	323	197	266	593	650	576	14.9	9.78	14.08	32.36	32.53	27.97	3.38074e-05	1.11403	up	--	--	Molecular Function: core promoter sequence-specific DNA binding (GO:0001046);; Molecular Function: transcriptional activator activity, RNA polymerase II transcription regulatory region sequence-specific binding (GO:0001228);; Cellular Component: nucleus (GO:0005634);; Biological Process: positive regulation of transcription from RNA polymerase II promoter (GO:0045944);; Molecular Function: protei…	--	--	--	--	Transcription factor UNE12 OS=Arabidopsis thaliana OX=3702 GN=UNE12 PE=2 SV=2	K	Transcription	hypothetical protein DCAR_002356 [Daucus carota subsp. sativus]
c80618.graph_c1	95	85	126	185	393	351	6.68	6.07	9	12.93	22.85	19.45	0.000722229	1.4258	up	--	--	--	--	[R]	General function prediction only	--	F-box/kelch-repeat protein SKIP11 OS=Arabidopsis thaliana OX=3702 GN=SKIP11 PE=1 SV=2	S	Function unknown	PREDICTED: F-box/kelch-repeat protein SKIP11-like [Daucus carota subsp. sativus]
c87711.graph_c0	316	453	247	136	67	120	15.4	23.66	13.72	7.66	3.54	6.12	0.00203662	-1.60881	down	--	--	Cellular Component: photosystem I (GO:0009522);; Biological Process: photosynthesis (GO:0015979);; Molecular Function: chlorophyll binding (GO:0016168);;	K02698|2.08423e-19|sind:105175776|K02698 photosystem I subunit X | (RefSeq) photosystem I reaction center subunit psaK, chloroplastic	--	--	--	Photosystem I reaction center subunit psaK, chloroplastic OS=Arabidopsis thaliana OX=3702 GN=PSAK PE=2 SV=2	S	Function unknown	hypothetical protein POPTR_018G027600v3 [Populus trichocarpa]
c77966.graph_c1	821	913	484	306	103	192	37.94	45.4	25.65	16.72	5.2	9.46	0.00117775	-1.78078	down	[I]	Lipid transport and metabolism	Molecular Function: hydrolase activity (GO:0016787);;	--	[V]	Defense mechanisms	alpha/beta hydrolase fold;; Carboxylesterase family;; Steryl acetyl hydrolase	Carboxylesterase 1 OS=Actinidia eriantha OX=165200 GN=CXE1 PE=1 SV=1	I	Lipid transport and metabolism	PREDICTED: carboxylesterase 1-like [Daucus carota subsp. sativus]
c82694.graph_c0	343	163	345	580	835	608	11.41	5.86	13.49	22.85	30.36	21.65	0.00323072	1.12964	up	[I]	Lipid transport and metabolism	Cellular Component: membrane (GO:0016020);;	--	[I]	Lipid transport and metabolism	PAP2 superfamily	Putative lipid phosphate phosphatase 3, chloroplastic OS=Arabidopsis thaliana OX=3702 GN=LPP3 PE=2 SV=1	I	Lipid transport and metabolism	PREDICTED: lipid phosphate phosphatase 1-like isoform X1 [Daucus carota subsp. sativus]
c69862.graph_c0	0	0	1	24	109	101	0	0	0.11	2.51	10.77	9.88	2.03649e-09	4.75456	up	--	--	Cellular Component: monolayer-surrounded lipid storage body (GO:0012511);; Cellular Component: integral component of membrane (GO:0016021);;	--	--	--	Oleosin	Oleosin 14.9 kDa OS=Arabidopsis thaliana OX=3702 GN=OL3 PE=2 SV=2	S	Function unknown	PREDICTED: oleosin 1-like [Daucus carota subsp. sativus]
c87531.graph_c1	169	202	174	59	102	47	6.24	7.79	6.55	2.28	4.1	1.45	0.00130149	-1.43569	down	[C]	Energy production and conversion	Cellular Component: plasma membrane (GO:0005886);;	--	--	--	NPH3 family	BTB/POZ domain-containing protein At1g30440 OS=Arabidopsis thaliana OX=3702 GN=At1g30440 PE=1 SV=2	S	Function unknown	PREDICTED: BTB/POZ domain-containing protein At1g30440-like [Daucus carota subsp. sativus]
c91240.graph_c0	1778	1688	1822	611	468	497	49.04	44.06	55.51	19.63	13.92	16.57	5.80007e-12	-1.78083	down	[O]	Posttranslational modification, protein turnover, chaperones	Molecular Function: serine-type endopeptidase activity (GO:0004252);; Cellular Component: cell wall (GO:0005618);; Biological Process: proteolysis (GO:0006508);;	--	--	--	Subtilase family;; Peptidase inhibitor I9;; PA domain	Subtilisin-like protease SBT1.7 OS=Arabidopsis thaliana OX=3702 GN=SBT1.7 PE=1 SV=1	O	Posttranslational modification, protein turnover, chaperones	PREDICTED: subtilisin-like protease SBT1.7 [Daucus carota subsp. sativus]
c92388.graph_c0	643	732	362	292	136	190	32.75	41.78	21.1	20.98	9.01	12.17	0.00649537	-1.45064	down	--	--	Molecular Function: protein binding (GO:0005515);;	--	--	--	--	Mitochondrial outer membrane protein porin of 34 kDa OS=Solanum tuberosum OX=4113 PE=1 SV=2	S	Function unknown	PREDICTED: uncharacterized protein LOC108202348 [Daucus carota subsp. sativus]
c80187.graph_c0	217	461	227	83	70	86	17.24	39.42	21.3	7.7	6.03	7.22	0.000147862	-1.89006	down	[E]	Amino acid transport and metabolism	Molecular Function: 4-hydroxy-tetrahydrodipicolinate reductase (GO:0008839);; Biological Process: lysine biosynthetic process via diaminopimelate (GO:0009089);; Cellular Component: chloroplast stroma (GO:0009570);; Biological Process: photosynthesis, light reaction (GO:0019684);; Biological Process: diaminopimelate biosynthetic process (GO:0019877);; Biological Process: oxidation-reduction proces…	K16908|4.83164e-108|pop:POPTR_0015s13920g|K16908 chloroplast NAD(P)H dehydrogenase [EC:1.6.99.-] | (RefSeq) POPTRDRAFT_835294; hypothetical protein	--	--	Dihydrodipicolinate reductase, N-terminus	Dihydrodipicolinate reductase-like protein CRR1, chloroplastic OS=Arabidopsis thaliana OX=3702 GN=DAPB3 PE=2 SV=1	E	Amino acid transport and metabolism	PREDICTED: dihydrodipicolinate reductase-like protein CRR1, chloroplastic [Daucus carota subsp. sativus]
c79454.graph_c0	1816	3242	1666	1073	434	834	121.77	234.83	128.47	84.77	31.85	59.6	0.0074196	-1.48231	down	[T]	Signal transduction mechanisms	Cellular Component: chloroplast (GO:0009507);; Biological Process: chloroplast-nucleus signaling pathway (GO:0010019);; Molecular Function: enzyme binding (GO:0019899);; Molecular Function: tetrapyrrole binding (GO:0046906);;	--	--	--	GUN4-like	Tetrapyrrole-binding protein, chloroplastic OS=Arabidopsis thaliana OX=3702 GN=GUN4 PE=1 SV=1	S	Function unknown	PREDICTED: tetrapyrrole-binding protein, chloroplastic [Daucus carota subsp. sativus]
c85216.graph_c0	432	267	295	143	166	169	26.85	18.08	21.02	11.07	11.97	11.59	0.000804381	-1.09834	down	--	--	--	--	--	--	--	--	S	Function unknown	PREDICTED: uncharacterized protein LOC108224418 [Daucus carota subsp. sativus]
c89294.graph_c1	307	804	359	160	80	118	16.06	45.26	21.55	9.88	4.58	6.58	0.000692138	-1.94499	down	--	--	Biological Process: protein folding (GO:0006457);;	--	--	--	--	IRK-interacting protein OS=Arabidopsis thaliana OX=3702 GN=IRKI PE=1 SV=1	S	Function unknown	PREDICTED: IRK-interacting protein [Daucus carota subsp. sativus]
c89345.graph_c0	978	1587	1089	667	385	506	29.47	50.19	37.83	22.58	11.67	15.68	0.00662782	-1.24932	down	[I]	Lipid transport and metabolism	Molecular Function: hydrolase activity (GO:0016787);;	--	[R]	General function prediction only	alpha/beta hydrolase fold;; Alpha/beta hydrolase family;; Serine aminopeptidase, S33;; Ndr family;; X8 domain	PLASMODESMATA CALLOSE-BINDING PROTEIN 3 OS=Arabidopsis thaliana OX=3702 GN=PDCB3 PE=1 SV=1	S	Function unknown	PREDICTED: uncharacterized hydrolase YugF-like [Daucus carota subsp. sativus]
c81362.graph_c0	813	483	597	272	326	317	34.15	21.93	28.86	12.71	14.89	13.61	0.000114305	-1.09717	down	[G]	Carbohydrate transport and metabolism	Biological Process: L-arabinose metabolic process (GO:0046373);; Molecular Function: alpha-L-arabinofuranosidase activity (GO:0046556);;	K01209|2.96972e-167|sot:102581676|K01209 alpha-N-arabinofuranosidase [EC:3.2.1.55] | (RefSeq) alpha-L-arabinofuranosidase 1-like	--	--	--	Alpha-L-arabinofuranosidase 1 OS=Arabidopsis thaliana OX=3702 GN=ASD1 PE=1 SV=1	G	Carbohydrate transport and metabolism	PREDICTED: alpha-L-arabinofuranosidase 1 [Daucus carota subsp. sativus]
c84566.graph_c0	192	146	218	63	53	58	6.74	5.52	8.83	2.61	2.04	2.17	5.81837e-06	-1.67531	down	--	--	--	--	--	--	Cotton fibre expressed protein	--	S	Function unknown	PREDICTED: uncharacterized protein LOC108192662 [Daucus carota subsp. sativus]
c88256.graph_c0	7754	9511	6280	4772	2797	3414	372.42	494.7	343.6	252.09	143.99	166.44	0.0076227	-1.12765	down	[G]	Carbohydrate transport and metabolism	Biological Process: carbohydrate metabolic process (GO:0005975);; Biological Process: dephosphorylation (GO:0016311);; Molecular Function: 2-alkenal reductase [NAD(P)] activity (GO:0032440);; Molecular Function: fructose 1,6-bisphosphate 1-phosphatase activity (GO:0042132);; Biological Process: oxidation-reduction process (GO:0055114);;	K03841|0|jcu:105646664|K03841 fructose-1,6-bisphosphatase I [EC:3.1.3.11] | (RefSeq) fructose-1,6-bisphosphatase, chloroplastic	[G]	Carbohydrate transport and metabolism	Fructose-1-6-bisphosphatase, N-terminal domain	Fructose-1,6-bisphosphatase, chloroplastic OS=Spinacia oleracea OX=3562 PE=1 SV=2	G	Carbohydrate transport and metabolism	PREDICTED: fructose-1,6-bisphosphatase, chloroplastic-like [Daucus carota subsp. sativus]
c70041.graph_c0	53	43	58	89	212	151	7.32	6.28	9.05	14.44	32.08	22.12	0.00598852	1.35627	up	[I]	Lipid transport and metabolism	Biological Process: lipid metabolic process (GO:0006629);; Cellular Component: integral component of membrane (GO:0016021);; Molecular Function: oxidoreductase activity, acting on paired donors, with oxidation of a pair of donors resulting in the reduction of molecular oxygen to two molecules of water (GO:0016717);; Molecular Function: phosphatidylcholine desaturase activity (GO:0050184);; Biolog…	K10256|3.10329e-74|jcu:105646514|K10256 omega-6 fatty acid desaturase / acyl-lipid omega-6 desaturase (Delta-12 desaturase) [EC:1.14.19.6 1.14.19.22] | (RefSeq) omega-6 fatty acid desaturase, endoplasmic reticulum isozyme 2	--	--	Domain of unknown function (DUF3474);; Fatty acid desaturase	Delta(12) fatty acid desaturase FAD2 OS=Calendula officinalis OX=41496 GN=FAD2 PE=2 SV=1	I	Lipid transport and metabolism	PREDICTED: delta(12)-fatty-acid desaturase FAD2-like [Daucus carota subsp. sativus]
c81218.graph_c0	36	18	41	114	240	137	1.91	1.03	2.5	7.14	13.99	7.76	1.45859e-05	2.10625	up	--	--	--	--	--	--	Protein of unknown function (DUF640)	Protein LIGHT-DEPENDENT SHORT HYPOCOTYLS 6 OS=Arabidopsis thaliana OX=3702 GN=LSH6 PE=1 SV=1	S	Function unknown	PREDICTED: protein LIGHT-DEPENDENT SHORT HYPOCOTYLS 6-like [Daucus carota subsp. sativus]
c74484.graph_c0	319	79	724	1568	2653	3289	43.75	11.65	114.16	256.99	405.95	484.55	0.000257846	2.34913	up	--	--	Cellular Component: integral component of membrane (GO:0016021);;	--	--	--	--	--	S	Function unknown	hypothetical protein DCAR_015999 [Daucus carota subsp. sativus]
c91510.graph_c1	773	555	874	1240	2474	2142	31.63	20.69	43.19	77.85	147.8	128.07	0.000152126	1.27267	up	[CHR]	Energy production and conversion ;; Coenzyme transport and metabolism ;; General function prediction only	Molecular Function: phosphoglycerate dehydrogenase activity (GO:0004617);; Biological Process: L-serine biosynthetic process (GO:0006564);; Molecular Function: amino acid binding (GO:0016597);; Molecular Function: NAD binding (GO:0051287);; Biological Process: oxidation-reduction process (GO:0055114);;	K00058|1.42502e-139|vvi:100241666|K00058 D-3-phosphoglycerate dehydrogenase [EC:1.1.1.95] | (RefSeq) D-3-phosphoglycerate dehydrogenase 3, chloroplastic	[E]	Amino acid transport and metabolism	D-isomer specific 2-hydroxyacid dehydrogenase, NAD binding domain;; D-isomer specific 2-hydroxyacid dehydrogenase, catalytic domain;; Acetohydroxy acid isomeroreductase, NADPH-binding domain;; ACT domain	D-3-phosphoglycerate dehydrogenase 2, chloroplastic OS=Arabidopsis thaliana OX=3702 GN=PGDH2 PE=1 SV=2	E	Amino acid transport and metabolism	PREDICTED: D-3-phosphoglycerate dehydrogenase 1, chloroplastic-like [Daucus carota subsp. sativus]
c84056.graph_c0	92	66	65	157	215	215	6.02	4.57	4.99	12.06	14.97	14.6	0.000635394	1.26359	up	--	--	Molecular Function: protein serine/threonine kinase activity (GO:0004674);; Molecular Function: non-membrane spanning protein tyrosine kinase activity (GO:0004715);; Molecular Function: ATP binding (GO:0005524);; Cellular Component: integral component of membrane (GO:0016021);; Biological Process: peptidyl-tyrosine phosphorylation (GO:0018108);;	--	[T]	Signal transduction mechanisms	--	Probable serine/threonine-protein kinase PBL7 OS=Arabidopsis thaliana OX=3702 GN=PBL7 PE=1 SV=1	T	Signal transduction mechanisms	hypothetical protein DCAR_006481 [Daucus carota subsp. sativus]
c80910.graph_c0	132	141	77	7	14	5	4.94	5.68	3.3	0.31	0.57	0.2	4.03039e-10	-3.4474	down	--	--	--	--	--	--	Transferase family	Pelargonidin 3-O-(6-caffeoylglucoside) 5-O-(6-O-malonylglucoside) 4&apos;&apos;&apos;-malonyltransferase OS=Salvia splendens OX=180675 PE=1 SV=1	--	--	PREDICTED: vinorine synthase-like [Daucus carota subsp. sativus]
c92664.graph_c0	278	281	240	128	130	84	4.32	4.88	4.94	2.03	2.07	1.21	0.00047937	-1.27246	down	[L]	Replication, recombination and repair	Biological Process: DNA metabolic process (GO:0006259);; Biological Process: cellular macromolecule biosynthetic process (GO:0034645);; Molecular Function: organic cyclic compound binding (GO:0097159);; Molecular Function: heterocyclic compound binding (GO:1901363);;	--	[L]	Replication, recombination and repair	DNA polymerase III, delta subunit;; ATPase family associated with various cellular activities (AAA);; AAA domain;; DNA polymerase III subunits gamma and tau domain III;; Holliday junction DNA helicase ruvB N-terminus	Protein STICHEL-like 3 OS=Arabidopsis thaliana OX=3702 GN=At4g18820 PE=3 SV=1	L	Replication, recombination and repair	PREDICTED: protein STICHEL-like 3 isoform X2 [Daucus carota subsp. sativus]
c85262.graph_c1	590	1684	914	232	343	193	24.02	97.33	53.53	10.22	13.13	8.17	2.71658e-05	-2.04969	down	[IR]	Lipid transport and metabolism ;; General function prediction only	Molecular Function: hydrolase activity, acting on ester bonds (GO:0016788);; Cellular Component: apoplast (GO:0048046);; Molecular Function: 9,9'-dicis-carotene:quinone oxidoreductase activity (GO:0052886);; Molecular Function: 7,9,9'-tricis-neurosporene:quinone oxidoreductase activity (GO:0052887);; Biological Process: 9,9'-di-cis-zeta-carotene desaturation to 7,9,7',9'-tetra-cis-lycopene (GO:00…	--	--	--	GDSL-like Lipase/Acylhydrolase	GDSL esterase/lipase APG OS=Arabidopsis thaliana OX=3702 GN=APG PE=2 SV=1	S	Function unknown	PREDICTED: GDSL esterase/lipase APG-like [Daucus carota subsp. sativus]
c78864.graph_c0	120	52	59	18	12	27	12.61	5.87	7.12	2.24	1.39	3.04	0.00656837	-1.81831	down	--	--	Molecular Function: iron ion binding (GO:0005506);; Cellular Component: integral component of membrane (GO:0016021);; Molecular Function: oxidoreductase activity, acting on paired donors, with incorporation or reduction of molecular oxygen, NAD(P)H as one donor, and incorporation of one atom of oxygen (GO:0016709);; Molecular Function: heme binding (GO:0020037);; Biological Process: secondary met…	--	[Q]	Secondary metabolites biosynthesis, transport and catabolism	Cytochrome P450	Flavonoid 3&apos;-monooxygenase OS=Arabidopsis thaliana OX=3702 GN=CYP75B1 PE=1 SV=1	Q	Secondary metabolites biosynthesis, transport and catabolism	hypothetical protein DCAR_016121 [Daucus carota subsp. sativus]
c89265.graph_c0	168	101	167	290	329	455	4.62	2.99	6.3	11.25	12.28	16.7	0.00301944	1.1856	up	--	--	--	--	--	--	cAMP-regulated phosphoprotein/endosulfine conserved region	--	S	Function unknown	PREDICTED: uncharacterized protein LOC108212074 isoform X1 [Daucus carota subsp. sativus]
c87878.graph_c0	768	967	631	446	315	285	40.05	54.07	36.95	26.75	18.08	15.44	0.00342286	-1.21199	down	--	--	Cellular Component: chloroplast thylakoid lumen (GO:0009543);; Biological Process: photosystem II repair (GO:0010206);; Biological Process: photosystem II assembly (GO:0010207);;	--	--	--	--	Photosystem II D1 precursor processing protein PSB27-H2, chloroplastic OS=Arabidopsis thaliana OX=3702 GN=PSB27-2 PE=1 SV=1	S	Function unknown	PREDICTED: photosystem II D1 precursor processing protein PSB27-H2, chloroplastic [Daucus carota subsp. sativus]
c68711.graph_c0	71	61	54	173	191	189	5.8	5.36	5.06	16.82	17.21	16.5	3.37835e-05	1.43547	up	--	--	--	--	--	--	--	--	--	--	PREDICTED: leucine-rich repeat extensin-like protein 6 [Daucus carota subsp. sativus]
c89178.graph_c0	10753	9190	7627	5448	3045	3566	372.07	344.68	294.4	236.81	114.43	142.86	0.0021313	-1.20337	down	--	--	--	--	--	--	--	--	S	Function unknown	PREDICTED: uncharacterized protein LOC108205731 [Daucus carota subsp. sativus]
c84350.graph_c0	343	174	400	859	1408	1418	25.6	14.03	34.53	76.97	115.53	113.7	6.69234e-07	1.84807	up	--	--	--	--	--	--	--	--	S	Function unknown	PREDICTED: uncharacterized protein LOC108197231 [Daucus carota subsp. sativus]
c82827.graph_c0	117	230	152	54	28	34	3.19	6.65	4.53	1.94	0.99	0.9	0.000300836	-2.00322	down	[T]	Signal transduction mechanisms	Molecular Function: protein serine/threonine kinase activity (GO:0004674);; Molecular Function: ATP binding (GO:0005524);; Biological Process: protein phosphorylation (GO:0006468);; Cellular Component: integral component of membrane (GO:0016021);; Molecular Function: carbohydrate binding (GO:0030246);;	--	--	--	Legume lectin domain;; Protein kinase domain;; Protein tyrosine kinase	L-type lectin-domain containing receptor kinase VIII.1 OS=Arabidopsis thaliana OX=3702 GN=LECRK81 PE=2 SV=1	T	Signal transduction mechanisms	PREDICTED: L-type lectin-domain containing receptor kinase VIII.1 [Daucus carota subsp. sativus]
c87186.graph_c0	98	155	87	20	11	18	2.35	3.82	2.3	0.58	0.29	0.46	2.62153e-06	-2.59936	down	--	--	--	--	--	--	Helix-loop-helix DNA-binding domain	Transcription factor bHLH74 OS=Arabidopsis thaliana OX=3702 GN=BHLH74 PE=1 SV=1	K	Transcription	PREDICTED: transcription factor bHLH74 [Daucus carota subsp. sativus]
c75491.graph_c0	60	23	26	1	2	0	5.41	1.85	2.57	0.13	0.2	0	1.28852e-05	-3.61354	down	[T]	Signal transduction mechanisms	--	--	--	--	CBS domain	CBS domain-containing protein CBSX3, mitochondrial OS=Arabidopsis thaliana OX=3702 GN=CBSX3 PE=1 SV=1	S	Function unknown	PREDICTED: CBS domain-containing protein CBSX3, mitochondrial-like isoform X1 [Daucus carota subsp. sativus]
c87175.graph_c0	204	263	231	1394	1933	1600	2.1	2.96	2.95	16.3	21.61	16.39	3.07714e-27	2.64965	up	--	--	Molecular Function: zinc ion binding (GO:0008270);; Cellular Component: integral component of membrane (GO:0016021);;	--	[S]	Function unknown	Zinc finger, C3HC4 type (RING finger);; Ring finger domain;; Prokaryotic RING finger family 4;; Zinc finger, C3HC4 type (RING finger);; RING-type zinc-finger;; Zinc finger, C3HC4 type (RING finger);; zinc-RING finger domain;; Late embryogenesis abundant protein	ERAD-associated E3 ubiquitin-protein ligase HRD1B OS=Arabidopsis thaliana OX=3702 GN=HRD1B PE=2 SV=1	S	Function unknown	PREDICTED: RING finger and transmembrane domain-containing protein 1-like isoform X1 [Daucus carota subsp. sativus]
c85841.graph_c0	740	844	599	320	268	258	34.73	42.35	32.07	17.67	13.92	12.84	1.45859e-05	-1.41189	down	[R]	General function prediction only	Molecular Function: O-methyltransferase activity (GO:0008171);; Biological Process: methylation (GO:0032259);;	--	[Q]	Secondary metabolites biosynthesis, transport and catabolism	O-methyltransferase;; O-methyltransferase	Caffeoyl-CoA O-methyltransferase OS=Mesembryanthemum crystallinum OX=3544 PE=2 SV=1	S	Function unknown	hypothetical protein DCAR_020095 [Daucus carota subsp. sativus]
c89908.graph_c0	11306	9900	7399	5076	3495	4181	754.92	711.12	566.82	400.81	256.15	298.1	0.000503616	-1.19493	down	[O]	Posttranslational modification, protein turnover, chaperones	Biological Process: sulfate assimilation (GO:0000103);; Biological Process: protein folding (GO:0006457);; Biological Process: glycerol ether metabolic process (GO:0006662);; Cellular Component: chloroplast (GO:0009507);; Molecular Function: protein disulfide oxidoreductase activity (GO:0015035);; Molecular Function: oxidoreductase activity, acting on a sulfur group of donors, disulfide as accept…	K03671|2.22723e-57|mtr:MTR_7g080250|K03671 thioredoxin 1 | (RefSeq) thioredoxin	[O]	Posttranslational modification, protein turnover, chaperones	Thioredoxin;; Thioredoxin-like	Thioredoxin F-type, chloroplastic OS=Pisum sativum OX=3888 PE=2 SV=1	O	Posttranslational modification, protein turnover, chaperones	PREDICTED: thioredoxin F1, chloroplastic-like [Daucus carota subsp. sativus]
c82158.graph_c0	173	125	142	59	71	51	7.13	5.85	7.11	3.02	3.32	2.39	0.000420806	-1.31614	down	--	--	--	--	--	--	--	--	S	Function unknown	PREDICTED: uncharacterized protein LOC108226471 [Daucus carota subsp. sativus]
c87161.graph_c0	171	204	211	482	460	443	6.23	7.88	7.31	17.64	14.13	14.16	0.000295955	1.12057	up	[E]	Amino acid transport and metabolism	Molecular Function: transporter activity (GO:0005215);; Biological Process: transport (GO:0006810);; Cellular Component: integral component of membrane (GO:0016021);;	--	[E]	Amino acid transport and metabolism	POT family;; POT family	Protein NRT1/ PTR FAMILY 3.1 OS=Arabidopsis thaliana OX=3702 GN=NPF3.1 PE=2 SV=1	E	Amino acid transport and metabolism	PREDICTED: protein NRT1/ PTR FAMILY 3.1-like [Daucus carota subsp. sativus]
c85193.graph_c1	1533	1119	1094	559	612	474	83.38	65.48	66.67	35.71	35.41	26.23	3.29731e-07	-1.24646	down	[R]	General function prediction only	--	--	--	--	Protein of unknown function, DUF393	Uncharacterized protein At5g50100, chloroplastic OS=Arabidopsis thaliana OX=3702 GN=At5g50100 PE=1 SV=1	S	Function unknown	PREDICTED: uncharacterized protein At5g50100, mitochondrial [Daucus carota subsp. sativus]
c92624.graph_c1	1259	1096	1193	588	561	480	22.65	20.76	24.65	12.65	11.08	9.26	2.01479e-07	-1.18596	down	--	--	--	--	[R]	General function prediction only	PPR repeat family;; Pentatricopeptide repeat domain;; PPR repeat;; Pentacotripeptide-repeat region of PRORP;; PPR repeat	Pentatricopeptide repeat-containing protein At3g46610 OS=Arabidopsis thaliana OX=3702 GN=At3g46610 PE=2 SV=1	S	Function unknown	PREDICTED: pentatricopeptide repeat-containing protein At3g46610 [Daucus carota subsp. sativus]
c75932.graph_c0	3267	2673	2002	1335	504	1160	209.95	180.58	145.34	94.1	35	76.38	0.00916467	-1.35418	down	--	--	--	--	--	--	--	Protein BIC1 OS=Arabidopsis thaliana OX=3702 GN=BIC1 PE=1 SV=1	S	Function unknown	PREDICTED: uncharacterized protein LOC108217990 [Daucus carota subsp. sativus]
c69774.graph_c0	119	212	119	18	11	6	5.1	9.77	5.84	0.91	0.51	0.27	2.25372e-09	-3.36075	down	--	--	Molecular Function: ubiquitin-protein transferase activity (GO:0004842);; Cellular Component: SCF ubiquitin ligase complex (GO:0019005);; Biological Process: SCF-dependent proteasomal ubiquitin-dependent protein catabolic process (GO:0031146);;	--	--	--	F-box associated;; F-box domain	F-box/kelch-repeat protein At3g23880 OS=Arabidopsis thaliana OX=3702 GN=At3g23880 PE=2 SV=1	S	Function unknown	hypothetical protein DCAR_007412 [Daucus carota subsp. sativus]
c79621.graph_c0	93	69	87	405	713	581	8.01	5.9	9.47	42.86	69.92	56.18	1.15781e-19	2.59451	up	--	--	Cellular Component: vacuolar membrane (GO:0005774);; Cellular Component: plasma membrane (GO:0005886);; Biological Process: regulation of pH (GO:0006885);; Biological Process: response to salt stress (GO:0009651);; Molecular Function: sodium:proton antiporter activity (GO:0015385);; Cellular Component: integral component of membrane (GO:0016021);; Biological Process: sodium ion transmembrane tran…	--	[P]	Inorganic ion transport and metabolism	--	Sodium/hydrogen exchanger 2 OS=Arabidopsis thaliana OX=3702 GN=NHX2 PE=2 SV=2	P	Inorganic ion transport and metabolism	hypothetical protein DCAR_002439 [Daucus carota subsp. sativus]
c93116.graph_c1	366	272	358	803	693	662	20.85	16.67	23.39	54.07	43.26	40.23	0.0003272	1.02278	up	--	--	Cellular Component: cytosol (GO:0005829);; Molecular Function: zinc ion binding (GO:0008270);; Cellular Component: plasmodesma (GO:0009506);; Biological Process: response to fungus (GO:0009620);; Biological Process: photomorphogenesis (GO:0009640);; Biological Process: response to auxin (GO:0009733);; Biological Process: unidimensional cell growth (GO:0009826);; Biological Process: auxin polar tr…	K10691|3.67443e-130|mdm:103425903|K10691 E3 ubiquitin-protein ligase UBR4 [EC:2.3.2.27] | (RefSeq) auxin transport protein BIG-like	[T]	Signal transduction mechanisms	E3 ubiquitin-protein ligase UBR4	Auxin transport protein BIG OS=Oryza sativa subsp. japonica OX=39947 GN=Os09g0247700 PE=2 SV=1	O	Posttranslational modification, protein turnover, chaperones	PREDICTED: auxin transport protein BIG isoform X2 [Daucus carota subsp. sativus]
c65995.graph_c0	6	13	21	0	0	0	0.61	1.42	2.44	0	0	0	0.00580831	-2.86525	down	--	--	--	--	--	--	Pollen proteins Ole e I like	Phylloplanin OS=Nicotiana tabacum OX=4097 PE=1 SV=1	S	Function unknown	PREDICTED: phylloplanin-like [Ziziphus jujuba]
c70641.graph_c0	502	611	399	139	136	128	106.81	139.61	97.61	35.71	32.85	29.45	3.62034e-09	-1.93702	down	--	--	Biological Process: metabolic process (GO:0008152);; Molecular Function: hydrolase activity (GO:0016787);;	K03841|1.6663e-11|gmx:100799873|K03841 fructose-1,6-bisphosphatase I [EC:3.1.3.11] | (RefSeq) fructose-1,6-bisphosphatase, chloroplastic	[G]	Carbohydrate transport and metabolism	--	Fructose-1,6-bisphosphatase, chloroplastic OS=Spinacia oleracea OX=3562 PE=1 SV=2	G	Carbohydrate transport and metabolism	PREDICTED: fructose-1,6-bisphosphatase, chloroplastic-like [Daucus carota subsp. sativus]
c81511.graph_c0	1721	1312	1232	3564	4742	3597	104.21	85.79	86.27	257.8	318.43	236.8	2.06693e-10	1.36854	up	[O]	Posttranslational modification, protein turnover, chaperones	--	--	--	--	Tetratricopeptide repeat;; Tetratricopeptide repeat	--	S	Function unknown	PREDICTED: uncharacterized protein LOC108220234 [Daucus carota subsp. sativus]
c80691.graph_c0	56	48	67	11	17	10	5.36	4.84	6.97	1.24	1.68	1.07	0.000382764	-2.04994	down	[J]	Translation, ribosomal structure and biogenesis	Molecular Function: nucleotide binding (GO:0000166);; Molecular Function: nucleic acid binding (GO:0003676);;	K14411|3.05944e-36|sot:102592136|K14411 RNA-binding protein Musashi | (RefSeq) heterogeneous nuclear ribonucleoprotein 1	[A]	RNA processing and modification	RNA recognition motif. (a.k.a. RRM, RBD, or RNP domain);; RNA recognition motif	Heterogeneous nuclear ribonucleoprotein 1 OS=Arabidopsis thaliana OX=3702 GN=RNP1 PE=1 SV=1	S	Function unknown	PREDICTED: heterogeneous nuclear ribonucleoprotein 1-like [Daucus carota subsp. sativus]
c62744.graph_c0	325	304	224	130	126	114	25.24	25.4	19.96	11.96	10.77	9.46	0.000357376	-1.24973	down	--	--	Cellular Component: integral component of membrane (GO:0016021);;	--	--	--	--	--	S	Function unknown	hypothetical protein DCAR_013159 [Daucus carota subsp. sativus]
c80565.graph_c0	1176	1803	792	197	117	229	69.3	114.9	53.79	14.98	7.85	15.06	3.33622e-09	-2.68593	down	--	--	--	--	--	--	--	--	S	Function unknown	hypothetical protein DCAR_020844 [Daucus carota subsp. sativus]
c86626.graph_c2	58	122	76	24	13	22	6.71	15.26	10.04	3.27	1.7	2.7	0.0024141	-1.96103	down	[R]	General function prediction only	Molecular Function: beta-1,4-mannosylglycoprotein 4-beta-N-acetylglucosaminyltransferase activity (GO:0003830);; Biological Process: protein N-linked glycosylation (GO:0006487);; Cellular Component: integral component of membrane (GO:0016021);;	K00737|1.4369e-126|sind:105156648|K00737 beta-1,4-mannosyl-glycoprotein beta-1,4-N-acetylglucosaminyltransferase [EC:2.4.1.144] | (RefSeq) uncharacterized LOC105156648	--	--	Glycosyltransferase family 17	--	--	--	PREDICTED: beta-1,4-mannosyl-glycoprotein 4-beta-N-acetylglucosaminyltransferase [Daucus carota subsp. sativus]
c68298.graph_c2	176	146	108	21	12	16	6.85	6.11	4.82	0.96	0.51	0.66	3.09811e-10	-2.95782	down	[QV]	Secondary metabolites biosynthesis, transport and catabolism ;; Defense mechanisms	Cellular Component: membrane (GO:0016020);; Molecular Function: oxidoreductase activity (GO:0016491);; Molecular Function: metal ion binding (GO:0046872);;	--	[QI]	--	Cytochrome P450	Alkane hydroxylase MAH1 OS=Arabidopsis thaliana OX=3702 GN=CYP96A15 PE=2 SV=1	Q	Secondary metabolites biosynthesis, transport and catabolism	PREDICTED: alkane hydroxylase MAH1-like [Daucus carota subsp. sativus]
c87525.graph_c0	564	1566	1064	284	105	207	17.27	52.22	38.62	11.13	3.52	6.79	4.36011e-05	-2.27234	down	[DPM]	Cell cycle control, cell division, chromosome partitioning ;; Inorganic ion transport and metabolism ;; Cell wall/membrane/envelope biogenesis	Molecular Function: copper ion binding (GO:0005507);; Cellular Component: plant-type cell wall (GO:0009505);; Cellular Component: plasmodesma (GO:0009506);; Molecular Function: oxidoreductase activity, oxidizing metal ions (GO:0016722);; Biological Process: oxidation-reduction process (GO:0055114);;	--	[Q]	Secondary metabolites biosynthesis, transport and catabolism	Multicopper oxidase;; Multicopper oxidase	L-ascorbate oxidase homolog OS=Brassica napus OX=3708 GN=Bp10 PE=2 SV=1	Q	Secondary metabolites biosynthesis, transport and catabolism	hypothetical protein DCAR_023005 [Daucus carota subsp. sativus]
c82598.graph_c0	384	114	404	73	82	58	15.03	6.26	19.29	3.62	3.37	2.69	0.000171532	-1.96795	down	--	--	Biological Process: regulation of response to biotic stimulus (GO:0002831);; Molecular Function: calmodulin binding (GO:0005516);; Biological Process: aromatic compound biosynthetic process (GO:0019438);; Biological Process: regulation of cellular biosynthetic process (GO:0031326);; Biological Process: regulation of defense response (GO:0031347);; Biological Process: regulation of response to ext…	--	--	--	Calmodulin binding protein-like	Protein SAR DEFICIENT 1 OS=Arabidopsis thaliana OX=3702 GN=SARD1 PE=1 SV=1	S	Function unknown	PREDICTED: protein SAR DEFICIENT 1-like [Daucus carota subsp. sativus]
c83105.graph_c0	649	1060	716	176	92	127	20.72	36.41	26.19	6.66	3.17	4.32	1.3362e-09	-2.54462	down	--	--	Cellular Component: membrane (GO:0016020);;	--	--	--	--	--	S	Function unknown	PREDICTED: uncharacterized protein LOC108215832 [Daucus carota subsp. sativus]
c78263.graph_c0	8	95	65	4	2	6	0.43	5.47	3.99	0.25	0.12	0.34	0.00194021	-2.79598	down	[G]	Carbohydrate transport and metabolism	Molecular Function: hydrolase activity, hydrolyzing O-glycosyl compounds (GO:0004553);; Cellular Component: cell wall (GO:0005618);; Biological Process: xyloglucan metabolic process (GO:0010411);; Molecular Function: xyloglucan:xyloglucosyl transferase activity (GO:0016762);; Biological Process: cell wall biogenesis (GO:0042546);; Cellular Component: apoplast (GO:0048046);; Biological Process: ce…	K08235|0|rcu:8267447|K08235 xyloglucan:xyloglucosyl transferase [EC:2.4.1.207] | (RefSeq) probable xyloglucan endotransglucosylase/hydrolase protein 8	--	--	Glycosyl hydrolases family 16;; Xyloglucan endo-transglycosylase (XET) C-terminus	Probable xyloglucan endotransglucosylase/hydrolase protein 8 OS=Arabidopsis thaliana OX=3702 GN=XTH8 PE=2 SV=2	G	Carbohydrate transport and metabolism	PREDICTED: probable xyloglucan endotransglucosylase/hydrolase protein 8 [Daucus carota subsp. sativus]
c91305.graph_c0	159	108	125	28	37	31	2.65	1.96	2.39	0.58	0.68	0.57	2.27916e-07	-2.01334	down	--	--	Molecular Function: calcium ion binding (GO:0005509);; Molecular Function: calcium-dependent phospholipid binding (GO:0005544);; Cellular Component: plasma membrane (GO:0005886);; Cellular Component: plasmodesma (GO:0009506);; Cellular Component: integral component of membrane (GO:0016021);; Biological Process: animal organ development (GO:0048513);;	--	--	--	Plant phosphoribosyltransferase C-terminal;; C2 domain	Protein QUIRKY OS=Arabidopsis thaliana OX=3702 GN=QKY PE=2 SV=1	S	Function unknown	PREDICTED: protein QUIRKY isoform X1 [Daucus carota subsp. sativus]
c84173.graph_c0	274	152	620	748	1748	1368	7.92	4.59	19.54	25.8	54.29	42.21	0.00429123	1.63943	up	[G]	Carbohydrate transport and metabolism	Cellular Component: integral component of membrane (GO:0016021);; Biological Process: nitrogen compound transport (GO:0071705);;	--	--	--	Ureide permease;; Ureide permease	Ureide permease 1 OS=Arabidopsis thaliana OX=3702 GN=UPS1 PE=1 SV=1	S	Function unknown	PREDICTED: ureide permease 2-like isoform X1 [Daucus carota subsp. sativus]
c75652.graph_c0	3256	1891	1881	249	165	194	194.41	120.42	130.13	14.02	10.35	11.1	3.07714e-27	-3.4462	down	--	--	--	--	--	--	--	--	--	--	PREDICTED: prisilkin-39-like [Daucus carota subsp. sativus]
c82341.graph_c0	170	132	440	337	3070	910	6.86	5.73	20.36	16.02	135.13	39.11	0.00621891	2.02653	up	--	--	--	--	--	--	D-mannose binding lectin	Epidermis-specific secreted glycoprotein EP1 OS=Daucus carota OX=4039 GN=EP1 PE=1 SV=1	S	Function unknown	PREDICTED: epidermis-specific secreted glycoprotein EP1-like [Daucus carota subsp. sativus]
c79158.graph_c0	289	132	230	895	1167	1265	13.49	6.33	12.23	49.92	60.39	64.37	4.30602e-12	2.21051	up	--	--	Cellular Component: integral component of membrane (GO:0016021);;	--	--	--	--	--	S	Function unknown	hypothetical protein DCAR_016323 [Daucus carota subsp. sativus]
c79924.graph_c0	516	448	413	224	280	157	25.51	23.22	22.73	13.32	15.31	8.8	0.000704808	-1.12424	down	--	--	Molecular Function: hydrolase activity (GO:0016787);;	K14497|1.327e-73|vvi:100242262|K14497 protein phosphatase 2C [EC:3.1.3.16] | (RefSeq) probable protein phosphatase 2C 53	[T]	Signal transduction mechanisms	--	Protein phosphatase 2C 7 OS=Arabidopsis thaliana OX=3702 GN=HAB2 PE=1 SV=2	T	Signal transduction mechanisms	PREDICTED: probable protein phosphatase 2C 53 isoform X1 [Daucus carota subsp. sativus]
c85302.graph_c0	5819	5058	3792	2284	2237	2130	297.71	277.43	217.83	139.36	131.48	129.55	9.08981e-06	-1.19838	down	[R]	General function prediction only	Cellular Component: intracellular (GO:0005622);; Molecular Function: pyridoxal phosphate binding (GO:0030170);;	K06997|2.33243e-52|nnu:104594058|K06997 PLP dependent protein | (RefSeq) proline synthase co-transcribed bacterial homolog protein-like	[R]	General function prediction only	Alanine racemase, N-terminal domain	--	S	Function unknown	PREDICTED: proline synthase co-transcribed bacterial homolog protein-like [Daucus carota subsp. sativus]
c86451.graph_c0	793	482	741	173	362	304	22.42	13.99	23.03	5.57	10.26	7.58	0.000344096	-1.30898	down	[G]	Carbohydrate transport and metabolism	Molecular Function: sucrose alpha-glucosidase activity (GO:0004575);; Cellular Component: vacuole (GO:0005773);; Biological Process: carbohydrate metabolic process (GO:0005975);; Cellular Component: integral component of membrane (GO:0016021);; Molecular Function: carbohydrate binding (GO:0030246);;	K01193|0|sind:105179219|K01193 beta-fructofuranosidase [EC:3.2.1.26] | (RefSeq) beta-fructofuranosidase, soluble isoenzyme I-like	[G]	Carbohydrate transport and metabolism	Glycosyl hydrolases family 32 N-terminal domain;; Glycosyl hydrolases family 32 C terminal;; Domain of unknown function (DUF3357)	Beta-fructofuranosidase, soluble isoenzyme I OS=Daucus carota OX=4039 GN=INV*DC4 PE=1 SV=2	G	Carbohydrate transport and metabolism	RecName: Full=Beta-fructofuranosidase, soluble isoenzyme I; AltName: Full=Invertase; AltName: Full=Saccharase; AltName: Full=Sucrose hydrolase; Flags: Precursor
c92927.graph_c0	4136	3804	7530	9230	17284	14178	57.28	57.36	118.02	150.42	256.85	207.46	0.00188114	1.23979	up	[O]	Posttranslational modification, protein turnover, chaperones	Molecular Function: metalloendopeptidase activity (GO:0004222);; Molecular Function: zinc ion binding (GO:0008270);; Biological Process: protein processing (GO:0016485);;	K06972|0|spen:107001275|K06972 presequence protease [EC:3.4.24.-] | (RefSeq) presequence protease 1, chloroplastic/mitochondrial-like	[RO]	--	Peptidase M16C associated;; Peptidase M16 inactive domain;; Insulinase (Peptidase family M16)	Presequence protease 1, chloroplastic/mitochondrial OS=Arabidopsis thaliana OX=3702 GN=PREP1 PE=1 SV=2	O	Posttranslational modification, protein turnover, chaperones	PREDICTED: presequence protease 1, chloroplastic/mitochondrial-like [Daucus carota subsp. sativus]
c88566.graph_c1	461	420	322	40	39	34	14.67	14.29	11.83	1.46	2.05	1.12	9.58176e-27	-3.37068	down	[C]	Energy production and conversion	--	--	--	--	FAD binding domain;; Berberine and berberine like	Berberine bridge enzyme-like 8 OS=Arabidopsis thaliana OX=3702 GN=At1g30700 PE=2 SV=1	C	Energy production and conversion	PREDICTED: flavin-dependent oxidoreductase FOX2-like [Daucus carota subsp. sativus]
c79331.graph_c0	179	115	150	54	33	20	16.35	11.07	15.28	5.88	3.42	1.85	0.000208047	-1.94358	down	--	--	Molecular Function: nucleic acid binding (GO:0003676);; Molecular Function: metal ion binding (GO:0046872);;	--	[R]	General function prediction only	--	Protein indeterminate-domain 1 OS=Arabidopsis thaliana OX=3702 GN=IDD1 PE=1 SV=1	S	Function unknown	PREDICTED: protein indeterminate-domain 9-like [Daucus carota subsp. sativus]
c78092.graph_c0	89	69	134	179	453	289	5.14	4.29	8.88	12.21	28.65	17.8	0.0027211	1.45137	up	--	--	--	--	--	--	--	--	S	Function unknown	PREDICTED: uncharacterized protein LOC108212238 [Daucus carota subsp. sativus]
c93113.graph_c0	998	677	671	486	372	303	21.65	16.7	17.51	12.89	9.57	6.92	0.00529389	-1.04318	down	--	--	--	--	[T]	Signal transduction mechanisms	NB-ARC domain	Probable disease resistance protein At1g51480 OS=Arabidopsis thaliana OX=3702 GN=At1g51480 PE=3 SV=2	S	Function unknown	PREDICTED: probable disease resistance protein At4g27220 isoform X3 [Daucus carota subsp. sativus]
c69766.graph_c0	350	402	193	76	36	68	40.95	50.42	25.95	10.56	4.66	8.51	6.94687e-06	-2.26769	down	--	--	Cellular Component: chloroplast (GO:0009507);; Cellular Component: membrane (GO:0016020);;	--	--	--	--	--	S	Function unknown	PREDICTED: uncharacterized protein LOC108202751 [Daucus carota subsp. sativus]
c91224.graph_c0	14	5	11	41	62	49	0.79	0.24	0.52	2.63	3.39	2.74	0.00286653	1.98795	up	[V]	Defense mechanisms	Molecular Function: ATP binding (GO:0005524);; Cellular Component: integral component of membrane (GO:0016021);; Molecular Function: ATPase activity, coupled to transmembrane movement of substances (GO:0042626);; Biological Process: transmembrane transport (GO:0055085);;	K05666|3.97727e-156|aip:107644907|K05666 ATP-binding cassette, subfamily C (CFTR/MRP), member 2 | (RefSeq) ABC transporter C family member 10-like	[Q]	Secondary metabolites biosynthesis, transport and catabolism	ABC transporter;; ABC transporter transmembrane region	ABC transporter C family member 10 OS=Arabidopsis thaliana OX=3702 GN=ABCC10 PE=2 SV=2	V	Defense mechanisms	PREDICTED: uncharacterized protein LOC108207885 [Daucus carota subsp. sativus]
c74658.graph_c0	29	14	51	92	188	123	1.66	0.79	3.66	6.41	12.24	7.84	0.00274157	1.81077	up	--	--	Cellular Component: integral component of membrane (GO:0016021);;	--	--	--	Tetraspanin family	Tetraspanin-6 OS=Arabidopsis thaliana OX=3702 GN=TET6 PE=2 SV=1	S	Function unknown	hypothetical protein DCAR_006454 [Daucus carota subsp. sativus]
c77734.graph_c0	1	0	11	18	151	52	0.02	0	0.28	0.54	4.41	1.72	0.00788199	2.63279	up	[S]	Function unknown	Molecular Function: phosphoric diester hydrolase activity (GO:0008081);; Cellular Component: membrane (GO:0016020);;	--	[C]	Energy production and conversion	Glycerophosphoryl diester phosphodiesterase family	Glycerophosphodiester phosphodiesterase GDPDL7 OS=Arabidopsis thaliana OX=3702 GN=GDPDL7 PE=2 SV=1	C	Energy production and conversion	PREDICTED: glycerophosphodiester phosphodiesterase GDPDL7 isoform X2 [Daucus carota subsp. sativus]
c88952.graph_c0	569	1166	884	444	141	242	13.22	29.13	24.3	12	3.56	5.86	0.00940101	-1.57829	down	[M]	Cell wall/membrane/envelope biogenesis	Molecular Function: protein serine/threonine kinase activity (GO:0004674);; Molecular Function: ATP binding (GO:0005524);; Biological Process: protein phosphorylation (GO:0006468);; Cellular Component: integral component of membrane (GO:0016021);;	--	--	--	Protein kinase domain;; Protein tyrosine kinase;; Leucine rich repeat N-terminal domain;; Leucine Rich repeats (2 copies);; Leucine rich repeat	Protein NSP-INTERACTING KINASE 1 OS=Arabidopsis thaliana OX=3702 GN=NIK1 PE=1 SV=1	T	Signal transduction mechanisms	PREDICTED: protein NSP-INTERACTING KINASE 1-like isoform X1 [Daucus carota subsp. sativus]
c84859.graph_c0	143	161	132	68	75	70	6.4	8.42	7.63	4.42	4.05	4.26	0.00766072	-1.08659	down	[H]	Coenzyme transport and metabolism	Molecular Function: 3-methyl-2-oxobutanoate hydroxymethyltransferase activity (GO:0003864);; Cellular Component: mitochondrion (GO:0005739);; Molecular Function: methyltransferase activity (GO:0008168);; Molecular Function: zinc ion binding (GO:0008270);; Cellular Component: chloroplast (GO:0009507);; Biological Process: pantothenate biosynthetic process (GO:0015940);; Biological Process: methyla…	K00606|0|thj:104817317|K00606 3-methyl-2-oxobutanoate hydroxymethyltransferase [EC:2.1.2.11] | (RefSeq) 3-methyl-2-oxobutanoate hydroxymethyltransferase 1, mitochondrial	[H]	Coenzyme transport and metabolism	Ketopantoate hydroxymethyltransferase;; Ketopantoate hydroxymethyltransferase	3-methyl-2-oxobutanoate hydroxymethyltransferase 2, mitochondrial OS=Arabidopsis thaliana OX=3702 GN=KPHMT2 PE=1 SV=1	H	Coenzyme transport and metabolism	PREDICTED: 3-methyl-2-oxobutanoate hydroxymethyltransferase 2, mitochondrial [Daucus carota subsp. sativus]
c91770.graph_c0	45302	59247	39418	27335	19366	22328	1640.06	2338.34	1605.33	1068.3	620.84	748.37	0.00320142	-1.10746	down	[G]	Carbohydrate transport and metabolism	Molecular Function: phosphoglycerate mutase activity (GO:0004619);; Cellular Component: cytoplasm (GO:0005737);; Biological Process: glucose catabolic process (GO:0006007);; Biological Process: glycolytic process (GO:0006096);; Molecular Function: manganese ion binding (GO:0030145);;	K15633|0|egr:104433381|K15633 2,3-bisphosphoglycerate-independent phosphoglycerate mutase [EC:5.4.2.12] | (RefSeq) 2,3-bisphosphoglycerate-independent phosphoglycerate mutase	[G]	Carbohydrate transport and metabolism	Metalloenzyme superfamily;; BPG-independent PGAM N-terminus (iPGM_N);; PsbP;; Metalloenzyme superfamily	2,3-bisphosphoglycerate-independent phosphoglycerate mutase OS=Mesembryanthemum crystallinum OX=3544 GN=PGM1 PE=2 SV=1	G	Carbohydrate transport and metabolism	cofactor-independent phosphoglyceromutase [Apium graveolens]
c86557.graph_c0	1276	3552	1686	459	464	438	48.49	145.53	73.42	21.29	20.88	20.43	1.33852e-06	-2.23303	down	--	--	Cellular Component: nucleus (GO:0005634);; Biological Process: response to oxidative stress (GO:0006979);; Cellular Component: chloroplast thylakoid membrane (GO:0009535);; Cellular Component: chloroplast thylakoid lumen (GO:0009543);; Molecular Function: L-ascorbate peroxidase activity (GO:0016688);; Molecular Function: heme binding (GO:0020037);; Biological Process: oxidation-reduction process …	K00434|2.26042e-178|vvi:104882489|K00434 L-ascorbate peroxidase [EC:1.11.1.11] | (RefSeq) thylakoid lumenal 29 kDa protein, chloroplastic	--	--	Peroxidase	Thylakoid lumenal 29 kDa protein, chloroplastic OS=Solanum lycopersicum OX=4081 GN=CLEB3J9 PE=3 SV=1	S	Function unknown	PREDICTED: thylakoid lumenal 29 kDa protein, chloroplastic [Daucus carota subsp. sativus]
c79594.graph_c0	57	53	40	8	14	9	3.03	3.05	2.47	0.52	0.83	0.51	0.000691677	-2.11439	down	--	--	--	--	--	--	Universal stress protein family	--	S	Function unknown	PREDICTED: uncharacterized protein LOC108220891 [Daucus carota subsp. sativus]
c89789.graph_c0	174	131	218	390	1084	558	3.72	2.31	4.72	7.55	19.94	10.07	4.05531e-05	1.73952	up	--	--	--	--	--	--	Plant calmodulin-binding domain	--	S	Function unknown	PREDICTED: uncharacterized protein LOC108211410 [Daucus carota subsp. sativus]
c92326.graph_c1	145	110	425	593	1484	1366	3.14	2.52	10.08	15.27	32.5	29.28	0.000470518	2.02649	up	[V]	Defense mechanisms	Molecular Function: transporter activity (GO:0005215);; Molecular Function: ATP binding (GO:0005524);; Biological Process: transport (GO:0006810);; Cellular Component: integral component of membrane (GO:0016021);; Molecular Function: ATPase activity (GO:0016887);;	--	[IR]	--	ABC transporter;; ABC-2 family transporter protein;; AAA domain, putative AbiEii toxin, Type IV TA system	ABC transporter A family member 2 OS=Arabidopsis thaliana OX=3702 GN=ABCA2 PE=2 SV=1	S	Function unknown	PREDICTED: ABC transporter A family member 2-like [Daucus carota subsp. sativus]
c85358.graph_c0	39	42	23	7	3	2	3.91	4.42	2.59	0.81	0.32	0.21	0.00194935	-2.52013	down	--	--	Molecular Function: nucleotide binding (GO:0000166);; Molecular Function: protein serine/threonine kinase activity (GO:0004674);; Cellular Component: plasma membrane (GO:0005886);; Biological Process: protein phosphorylation (GO:0006468);; Biological Process: defense response (GO:0006952);; Cellular Component: plasmodesma (GO:0009506);;	--	--	--	Protein tyrosine kinase	Cysteine-rich receptor-like protein kinase 4 OS=Arabidopsis thaliana OX=3702 GN=CRK4 PE=2 SV=1	T	Signal transduction mechanisms	PREDICTED: uncharacterized protein LOC108224124 [Daucus carota subsp. sativus]
c77118.graph_c0	448	767	462	212	157	169	19.1	35.27	22.34	10.47	7.32	7.64	9.94651e-05	-1.65204	down	[R]	General function prediction only	--	--	--	--	NAD(P)H-binding	Sanguinarine reductase OS=Eschscholzia californica OX=3467 GN=SARED1 PE=1 SV=1	S	Function unknown	PREDICTED: uncharacterized protein At2g37660, chloroplastic isoform X3 [Daucus carota subsp. sativus]
c81723.graph_c0	3068	3332	2355	1460	968	1403	159.86	187.4	143.14	92.26	59.43	81.98	0.00100786	-1.22149	down	[P]	Inorganic ion transport and metabolism	Molecular Function: carbonate dehydratase activity (GO:0004089);; Molecular Function: zinc ion binding (GO:0008270);; Biological Process: carbon utilization (GO:0015976);;	K01673|2.10679e-141|cam:101502849|K01673 carbonic anhydrase [EC:4.2.1.1] | (RefSeq) carbonic anhydrase 2	[P]	Inorganic ion transport and metabolism	Carbonic anhydrase	Carbonic anhydrase, chloroplastic OS=Nicotiana tabacum OX=4097 PE=2 SV=1	P	Inorganic ion transport and metabolism	PREDICTED: carbonic anhydrase 2 isoform X1 [Daucus carota subsp. sativus]
c85192.graph_c0	2157	1873	1945	508	546	527	66.59	67.05	77.64	29.27	45.38	36.26	4.10241e-28	-1.97962	down	[I]	Lipid transport and metabolism	Molecular Function: iron ion binding (GO:0005506);; Cellular Component: plasma membrane (GO:0005886);; Biological Process: fatty acid biosynthetic process (GO:0006633);; Biological Process: cuticle hydrocarbon biosynthetic process (GO:0006723);; Biological Process: wax biosynthetic process (GO:0010025);; Cellular Component: integral component of membrane (GO:0016021);; Molecular Function: oxidore…	--	--	--	WAX2 C-terminal domain;; Fatty acid hydroxylase superfamily	Protein ECERIFERUM 3 OS=Arabidopsis thaliana OX=3702 GN=CER3 PE=1 SV=1	S	Function unknown	PREDICTED: protein ECERIFERUM 3 [Daucus carota subsp. sativus]
c80670.graph_c0	232	251	159	31	29	41	11.52	13.43	9.11	1.87	1.61	2.19	3.01651e-10	-2.5999	down	--	--	--	--	--	--	--	--	--	--	hypothetical protein DCAR_026780 [Daucus carota subsp. sativus]
c88437.graph_c0	306	167	510	922	3688	2311	17.08	10.53	26.65	52.94	167.76	106.15	1.97574e-06	2.46925	up	[I]	Lipid transport and metabolism	Biological Process: metabolic process (GO:0008152);; Biological Process: positive regulation of gibberellic acid mediated signaling pathway (GO:0009939);; Molecular Function: hydrolase activity (GO:0016787);; Biological Process: floral organ morphogenesis (GO:0048444);;	K14493|0|cit:102618248|K14493 gibberellin receptor GID1 [EC:3.-.-.-] | (RefSeq) gibberellin receptor GID1B	[V]	Defense mechanisms	alpha/beta hydrolase fold;; Carboxylesterase family	Gibberellin receptor GID1B OS=Arabidopsis thaliana OX=3702 GN=GID1B PE=1 SV=1	I	Lipid transport and metabolism	PREDICTED: gibberellin receptor GID1B-like [Daucus carota subsp. sativus]
c84678.graph_c0	524	361	591	893	1313	1260	29.64	22.04	38.33	46.81	65.86	56.78	0.000159574	1.11938	up	--	--	--	--	--	--	--	--	S	Function unknown	PREDICTED: uncharacterized protein LOC108209182 [Daucus carota subsp. sativus]
c74992.graph_c0	92	57	71	18	10	24	4.92	3.82	4.25	1.52	0.9	1.77	0.00174402	-1.91207	down	--	--	Molecular Function: structural constituent of ribosome (GO:0003735);; Biological Process: translation (GO:0006412);; Cellular Component: integral component of membrane (GO:0016021);; Biological Process: transmembrane transport (GO:0055085);;	K14684|0|vvi:100266320|K14684 solute carrier family 25 (mitochondrial phosphate transporter), member 23/24/25/41 | (RefSeq) protein brittle-1, chloroplastic/amyloplastic-like	[C]	Energy production and conversion	Mitochondrial carrier protein	Adenine nucleotide transporter BT1, chloroplastic/mitochondrial OS=Arabidopsis thaliana OX=3702 GN=BT1 PE=1 SV=1	S	Function unknown	PREDICTED: adenine nucleotide transporter BT1, chloroplastic/mitochondrial-like [Daucus carota subsp. sativus]
c78549.graph_c0	1457	1003	1030	471	205	293	50.67	37.67	40.84	19.13	7.69	10.75	2.80733e-05	-1.78747	down	--	--	--	--	--	--	--	Putative zinc finger protein At1g68190 OS=Arabidopsis thaliana OX=3702 GN=At1g68190 PE=2 SV=1	S	Function unknown	hypothetical protein DCAR_026755 [Daucus carota subsp. sativus]
c86564.graph_c0	1851	3691	1846	1123	956	1037	90.13	189.75	102.87	63.22	49.66	53.43	0.00534478	-1.28837	down	[GR]	Carbohydrate transport and metabolism ;; General function prediction only	Biological Process: metabolic process (GO:0008152);; Cellular Component: chloroplast stroma (GO:0009570);; Cellular Component: chloroplast envelope (GO:0009941);; Molecular Function: hydrolase activity (GO:0016787);;	--	[R]	General function prediction only	--	CBBY-like protein OS=Arabidopsis thaliana OX=3702 GN=CBBY PE=1 SV=1	S	Function unknown	PREDICTED: haloacid dehalogenase-like hydrolase domain-containing protein At3g48420 [Daucus carota subsp. sativus]
c76376.graph_c0	161	276	339	500	1290	906	6.41	11.42	15.46	24.15	56.36	37.98	0.00115789	1.55705	up	--	--	Molecular Function: RNA polymerase II regulatory region sequence-specific DNA binding (GO:0000977);; Molecular Function: transcription factor activity, sequence-specific DNA binding (GO:0003700);; Biological Process: regulation of transcription from RNA polymerase II promoter (GO:0006357);; Cellular Component: RNA polymerase II transcription factor complex (GO:0090575);;	--	--	--	--	Transcription factor bHLH168 OS=Arabidopsis thaliana OX=3702 GN=BHLH168 PE=3 SV=1	S	Function unknown	hypothetical protein DCAR_026126 [Daucus carota subsp. sativus]
c73417.graph_c0	1409	565	1206	513	476	454	112.49	48.61	109.83	47.03	41.26	38.16	0.00563799	-1.14177	down	--	--	Cellular Component: cytoplasm (GO:0005737);; Biological Process: metal ion transport (GO:0030001);; Molecular Function: transition metal ion binding (GO:0046914);; Biological Process: cellular transition metal ion homeostasis (GO:0046916);;	--	[P]	Inorganic ion transport and metabolism	--	Heavy metal-associated isoprenylated plant protein 21 OS=Arabidopsis thaliana OX=3702 GN=HIPP21 PE=1 SV=1	S	Function unknown	PREDICTED: heavy metal-associated isoprenylated plant protein 21-like [Daucus carota subsp. sativus]
c83944.graph_c0	102	115	237	429	1217	1087	2.62	3.37	8.05	12.78	36.03	31.02	3.13493e-06	2.28725	up	--	--	Molecular Function: protein serine/threonine phosphatase activity (GO:0004722);; Biological Process: protein dephosphorylation (GO:0006470);; Cellular Component: integral component of membrane (GO:0016021);; Molecular Function: metal ion binding (GO:0046872);;	K14497|4.64252e-87|cit:102623733|K14497 protein phosphatase 2C [EC:3.1.3.16] | (RefSeq) protein phosphatase 2C 56-like	[T]	Signal transduction mechanisms	Protein phosphatase 2C;; Protein phosphatase 2C	Protein phosphatase 2C 56 OS=Arabidopsis thaliana OX=3702 GN=ABI1 PE=1 SV=2	T	Signal transduction mechanisms	PREDICTED: probable protein phosphatase 2C 6 [Daucus carota subsp. sativus]
c89544.graph_c0	114	228	137	37	33	53	3.84	8.79	5.42	1.93	1.4	2.49	0.000441073	-1.89916	down	--	--	Molecular Function: zinc ion binding (GO:0008270);;	--	[R]	General function prediction only	PPR repeat family;; PPR repeat;; DYW family of nucleic acid deaminases;; PPR repeat;; Pentatricopeptide repeat domain;; Pentacotripeptide-repeat region of PRORP	Pentatricopeptide repeat-containing protein At1g31920 OS=Arabidopsis thaliana OX=3702 GN=PCMP-H11 PE=2 SV=1	S	Function unknown	PREDICTED: pentatricopeptide repeat-containing protein At1g31920 [Daucus carota subsp. sativus]
c90118.graph_c0	535	294	449	983	1177	1047	26.46	16.52	25.96	61.85	65.82	62.61	6.76488e-06	1.22815	up	[T]	Signal transduction mechanisms	--	--	--	--	Protein kinase domain;; Protein tyrosine kinase	Histone deacetylase HDT1 OS=Solanum chacoense OX=4108 GN=HDT1 PE=2 SV=1	B	Chromatin structure and dynamics	PREDICTED: histone deacetylase HDT1-like [Daucus carota subsp. sativus]
c89624.graph_c0	3883	3681	2864	2077	1632	1669	84.17	86.26	71.56	52.52	39.35	38.31	0.00140926	-1.00688	down	[T]	Signal transduction mechanisms	Cellular Component: integral component of membrane (GO:0016021);;	--	--	--	CBS domain;; PB1 domain	CBS domain-containing protein CBSCBSPB3 OS=Arabidopsis thaliana OX=3702 GN=CBSCBSPB3 PE=1 SV=1	S	Function unknown	PREDICTED: CBS domain-containing protein CBSCBSPB3 isoform X1 [Daucus carota subsp. sativus]
c89269.graph_c0	406	357	360	154	78	87	28.16	27.55	29.53	10.76	5.15	6.36	2.33493e-05	-1.77645	down	[T]	Signal transduction mechanisms	Molecular Function: protein serine/threonine kinase activity (GO:0004674);; Molecular Function: ATP binding (GO:0005524);; Biological Process: protein phosphorylation (GO:0006468);; Cellular Component: integral component of membrane (GO:0016021);; Molecular Function: carbohydrate binding (GO:0030246);;	--	--	--	Legume lectin domain;; Protein kinase domain;; Protein tyrosine kinase	L-type lectin-domain containing receptor kinase IV.2 OS=Arabidopsis thaliana OX=3702 GN=LECRK42 PE=2 SV=1	T	Signal transduction mechanisms	PREDICTED: L-type lectin-domain containing receptor kinase IV.1-like [Daucus carota subsp. sativus]
c79795.graph_c0	845	701	1224	2532	5123	5371	81.68	72.16	133.32	269.66	509.89	522.85	1.46495e-08	2.04729	up	[S]	Function unknown	Cellular Component: integral component of membrane (GO:0016021);;	--	[R]	General function prediction only	Proteolipid membrane potential modulator	Hydrophobic protein RCI2A OS=Arabidopsis thaliana OX=3702 GN=RCI2A PE=2 SV=1	S	Function unknown	PREDICTED: hydrophobic protein RCI2A [Daucus carota subsp. sativus]
c92240.graph_c0	501	580	390	861	2814	1141	6.89	8.23	6.12	13.77	41.6	16.41	0.00325754	1.45868	up	[G]	Carbohydrate transport and metabolism	Molecular Function: alpha-amylase activity (GO:0004556);; Molecular Function: calcium ion binding (GO:0005509);; Biological Process: carbohydrate metabolic process (GO:0005975);;	K01176|1.90929e-160|pper:PRUPE_ppa006402mg|K01176 alpha-amylase [EC:3.2.1.1] | (RefSeq) hypothetical protein	[G]	Carbohydrate transport and metabolism	Alpha amylase, catalytic domain;; Alpha-amylase C-terminal beta-sheet domain	Probable alpha-amylase 2 OS=Arabidopsis thaliana OX=3702 GN=AMY2 PE=2 SV=1	G	Carbohydrate transport and metabolism	PREDICTED: probable alpha-amylase 2 [Daucus carota subsp. sativus]
c88968.graph_c0	36087	51376	32076	21467	11650	18612	610.35	934.35	621.28	426.19	213.19	334.34	0.00712507	-1.22398	down	[I]	Lipid transport and metabolism	Molecular Function: phospholipase D activity (GO:0004630);; Molecular Function: calcium ion binding (GO:0005509);; Cellular Component: membrane (GO:0016020);; Biological Process: lipid catabolic process (GO:0016042);; Biological Process: phosphatidylcholine metabolic process (GO:0046470);; Molecular Function: N-acylphosphatidylethanolamine-specific phospholipase D activity (GO:0070290);;	K01115|0|sind:105159372|K01115 phospholipase D1/2 [EC:3.1.4.4] | (RefSeq) phospholipase D delta-like	[I]	Lipid transport and metabolism	Phospholipase D C terminal;; C2 domain;; Phospholipase D Active site motif;; PLD-like domain;; Copper binding proteins, plastocyanin/azurin family;; Cupredoxin-like domain	Phospholipase D delta OS=Arabidopsis thaliana OX=3702 GN=PLDDELTA PE=1 SV=2	I	Lipid transport and metabolism	PREDICTED: phospholipase D delta-like [Daucus carota subsp. sativus]
c92172.graph_c0	335	270	309	674	1692	810	19.56	16.71	21.3	38.17	82.62	38.07	1.84101e-05	1.60326	up	--	--	--	--	--	--	CCT motif	Transcription factor GHD7 OS=Oryza sativa subsp. japonica OX=39947 GN=GHD7 PE=1 SV=1	S	Function unknown	PREDICTED: uncharacterized protein LOC108216214 [Daucus carota subsp. sativus]
c84981.graph_c0	1294	1826	1691	573	445	507	46.83	70.81	70.22	25.51	17.8	19.75	1.61064e-07	-1.69089	down	--	--	--	--	[R]	General function prediction only	Protein of unknown function (DUF1685)	--	S	Function unknown	hypothetical protein LSAT_6X55301 [Lactuca sativa]
c89304.graph_c0	405	334	422	173	95	145	15.92	18.03	18.95	11.04	4.01	9.97	0.000238187	-1.47763	down	--	--	Molecular Function: binding (GO:0005488);;	--	--	--	Helix-loop-helix DNA-binding domain	Transcription factor UNE10 OS=Arabidopsis thaliana OX=3702 GN=UNE10 PE=2 SV=1	K	Transcription	PREDICTED: transcription factor PIF7-like [Daucus carota subsp. sativus]
c90120.graph_c0	418	444	402	1724	2272	2141	8.03	9.23	8.96	39.62	47.94	44.26	6.61934e-24	2.14438	up	[GM]	Carbohydrate transport and metabolism ;; Cell wall/membrane/envelope biogenesis	Biological Process: carbohydrate metabolic process (GO:0005975);; Molecular Function: isomerase activity (GO:0016853);; Molecular Function: carbohydrate binding (GO:0030246);;	--	--	--	--	--	M	Cell wall/membrane/envelope biogenesis	PREDICTED: 3-hexulose-6-phosphate isomerase [Daucus carota subsp. sativus]
c91399.graph_c0	437	507	441	203	311	208	24.03	32.24	29.06	16.24	19.58	12.28	0.00143507	-1.02666	down	[J]	Translation, ribosomal structure and biogenesis	Molecular Function: nucleic acid binding (GO:0003676);; Molecular Function: asparagine-tRNA ligase activity (GO:0004816);; Molecular Function: ATP binding (GO:0005524);; Cellular Component: cytoplasm (GO:0005737);; Biological Process: asparaginyl-tRNA aminoacylation (GO:0006421);;	K01893|0|jcu:105632269|K01893 asparaginyl-tRNA synthetase [EC:6.1.1.22] | (RefSeq) asparagine--tRNA ligase, chloroplastic/mitochondrial	[J]	Translation, ribosomal structure and biogenesis	tRNA synthetases class II (D, K and N)	Asparagine--tRNA ligase, chloroplastic/mitochondrial OS=Arabidopsis thaliana OX=3702 GN=SYNO PE=2 SV=3	J	Translation, ribosomal structure and biogenesis	PREDICTED: asparagine--tRNA ligase, chloroplastic/mitochondrial-like isoform X2 [Daucus carota subsp. sativus]
c78869.graph_c0	219	186	106	49	54	62	12.75	11.65	7.14	3.37	3.44	3.85	0.000618971	-1.61299	down	--	--	--	--	--	--	AP2 domain	Ethylene-responsive transcription factor 13 OS=Arabidopsis thaliana OX=3702 GN=ERF13 PE=2 SV=2	--	--	PREDICTED: ethylene-responsive transcription factor 2-like [Daucus carota subsp. sativus]
c92851.graph_c0	906	1095	782	324	124	181	25.67	34.49	23.76	13.36	4.84	7.79	1.07362e-05	-2.05936	down	--	--	Molecular Function: motor activity (GO:0003774);; Molecular Function: actin binding (GO:0003779);; Molecular Function: ATP binding (GO:0005524);; Cellular Component: myosin complex (GO:0016459);;	--	[Z]	Cytoskeleton	Myosin head (motor domain);; IQ calmodulin-binding motif	Myosin-1 OS=Arabidopsis thaliana OX=3702 GN=VIII-1 PE=1 SV=1	Z	Cytoskeleton	hypothetical protein DCAR_023473 [Daucus carota subsp. sativus]
c92373.graph_c1	810	535	973	2296	5902	3685	24.25	14.73	37.35	94.39	236.59	144.23	3.06755e-09	2.15164	up	--	--	--	--	--	--	BRO1-like domain;; cwf18 pre-mRNA splicing factor	--	S	Function unknown	PREDICTED: uncharacterized protein LOC108211048 [Daucus carota subsp. sativus]
c87282.graph_c0	675	984	609	397	314	358	69.53	125.14	84.74	40.55	32.95	30.99	0.0060639	-1.13324	down	[O]	Posttranslational modification, protein turnover, chaperones	Molecular Function: iron ion binding (GO:0005506);; Biological Process: iron-sulfur cluster assembly (GO:0016226);; Molecular Function: iron-sulfur cluster binding (GO:0051536);;	--	[O]	Posttranslational modification, protein turnover, chaperones	NifU-like domain	NifU-like protein 3, chloroplastic OS=Arabidopsis thaliana OX=3702 GN=NIFU3 PE=2 SV=1	O	Posttranslational modification, protein turnover, chaperones	PREDICTED: nifU-like protein 3, chloroplastic [Daucus carota subsp. sativus]
c67471.graph_c0	161	278	102	396	2256	780	5.29	9.96	3.91	15.53	81.68	27.73	0.00062393	2.17888	up	[G]	Carbohydrate transport and metabolism	Biological Process: flavonoid biosynthetic process (GO:0009813);; Cellular Component: intracellular membrane-bounded organelle (GO:0043231);; Biological Process: flavonoid glucuronidation (GO:0052696);; Molecular Function: quercetin 3-O-glucosyltransferase activity (GO:0080043);; Molecular Function: quercetin 7-O-glucosyltransferase activity (GO:0080044);;	K13269|1.8011e-113|sly:101268117|K13269 kaempferol 3-O-beta-D-galactosyltransferase [EC:2.4.1.234] | (RefSeq) kaempferol 3-O-beta-D-galactosyltransferase-like	[GC]	--	UDP-glucoronosyl and UDP-glucosyl transferase	Kaempferol 3-O-beta-D-galactosyltransferase OS=Petunia hybrida OX=4102 PE=1 SV=1	S	Function unknown	PREDICTED: kaempferol 3-O-beta-D-galactosyltransferase-like [Daucus carota subsp. sativus]
c75015.graph_c0	137	65	70	283	550	466	8.53	4.34	5.06	20.81	37.5	30.94	3.50995e-07	2.06082	up	--	--	--	--	--	--	--	--	--	--	PREDICTED: putative glycine-rich cell wall structural protein 1 [Daucus carota subsp. sativus]
c86316.graph_c0	367	203	523	812	848	925	20.17	12.16	34.72	53.69	55.02	57.01	0.00929177	1.12711	up	--	--	Molecular Function: protein serine/threonine kinase activity (GO:0004674);; Molecular Function: ATP binding (GO:0005524);; Biological Process: protein phosphorylation (GO:0006468);;	K04733|1.21445e-39|egr:104433608|K04733 interleukin-1 receptor-associated kinase 4 [EC:2.7.11.1] | (RefSeq) protein kinase 2B, chloroplastic	[T]	Signal transduction mechanisms	Protein kinase domain	Probable serine/threonine-protein kinase PBL3 OS=Arabidopsis thaliana OX=3702 GN=PBL3 PE=1 SV=1	T	Signal transduction mechanisms	hypothetical protein DCAR_007138 [Daucus carota subsp. sativus]
c81562.graph_c0	134	134	142	33	56	13	7.53	8.69	9.39	2.35	3.33	0.8	0.000711432	-1.93673	down	--	--	--	K11699|2.22722e-64|sly:101257834|K11699 RNA-dependent RNA polymerase [EC:2.7.7.48] | (RefSeq) probable RNA-dependent RNA polymerase 5	[A]	RNA processing and modification	RNA dependent RNA polymerase	Probable RNA-dependent RNA polymerase 4 OS=Arabidopsis thaliana OX=3702 GN=RDR4 PE=3 SV=2	K	Transcription	PREDICTED: probable RNA-dependent RNA polymerase 5 [Daucus carota subsp. sativus]
c85749.graph_c0	28	14	67	190	591	333	1.03	0.56	2.52	7.63	21.69	12.26	9.03145e-07	2.87238	up	--	--	Biological Process: amino acid transmembrane transport (GO:0003333);; Cellular Component: plasma membrane (GO:0005886);; Molecular Function: amino acid transmembrane transporter activity (GO:0015171);; Cellular Component: integral component of membrane (GO:0016021);;	--	[E]	Amino acid transport and metabolism	Transmembrane amino acid transporter protein;; Transmembrane amino acid transporter protein;; Tryptophan/tyrosine permease family	Amino acid permease 2 OS=Arabidopsis thaliana OX=3702 GN=AAP2 PE=1 SV=1	E	Amino acid transport and metabolism	PREDICTED: probable amino acid permease 7 [Daucus carota subsp. sativus]
c81235.graph_c0	98	67	84	176	262	207	5.84	4.25	5.68	12.3	16.97	13.04	0.000249096	1.24278	up	--	--	--	K15414|9.16376e-79|sly:101257446|K15414 complement component 1 Q subcomponent-binding protein, mitochondrial | (RefSeq) uncharacterized protein At2g39795, mitochondrial	[C]	Energy production and conversion	Mitochondrial glycoprotein	Uncharacterized protein At2g39795, mitochondrial OS=Arabidopsis thaliana OX=3702 GN=At2g39795 PE=1 SV=1	S	Function unknown	PREDICTED: uncharacterized protein At2g39795, mitochondrial-like [Daucus carota subsp. sativus]
c82683.graph_c0	1847	6675	3901	786	323	866	92.11	408.36	242.47	46.59	17.82	46.69	1.91444e-05	-2.46415	down	--	--	--	--	--	--	Pollen proteins Ole e I like	Proline-rich protein 4 OS=Arabidopsis thaliana OX=3702 GN=PRP4 PE=2 SV=1	S	Function unknown	PREDICTED: proline-rich protein 4-like [Daucus carota subsp. sativus]
c80048.graph_c0	108	44	74	167	240	202	4.62	2.04	3.64	8.44	11.26	9.21	0.00422456	1.29124	up	[J]	Translation, ribosomal structure and biogenesis	Biological Process: cleavage in ITS2 between 5.8S rRNA and LSU-rRNA of tricistronic rRNA transcript (SSU-rRNA, 5.8S rRNA, LSU-rRNA) (GO:0000448);; Molecular Function: ATP binding (GO:0005524);; Cellular Component: nucleus (GO:0005634);; Biological Process: phosphorylation (GO:0016310);; Molecular Function: polynucleotide 5'-hydroxyl-kinase activity (GO:0051731);;	K06947|0|vvi:100244933|K06947 polynucleotide 5'-hydroxyl-kinase GRC3/NOL9 [EC:2.7.1.-] | (RefSeq) polynucleotide 5'-hydroxyl-kinase NOL9	[R]	General function prediction only	mRNA cleavage and polyadenylation factor CLP1 P-loop	Polynucleotide 5&apos;-hydroxyl-kinase NOL9 OS=Arabidopsis thaliana OX=3702 GN=At5g11010 PE=2 SV=1	S	Function unknown	PREDICTED: polynucleotide 5&apos;-hydroxyl-kinase NOL9 [Daucus carota subsp. sativus]
c85087.graph_c0	414	474	350	204	111	118	22.16	27.46	21.47	13.22	6.51	7.36	0.000781233	-1.50341	down	--	--	--	--	--	--	PAP_fibrillin	Probable plastid-lipid-associated protein 11, chloroplastic OS=Arabidopsis thaliana OX=3702 GN=PAP11 PE=2 SV=1	S	Function unknown	PREDICTED: probable plastid-lipid-associated protein 11 isoform X1 [Daucus carota subsp. sativus]
c76961.graph_c0	9	2	3	20	50	39	0.75	0.17	0.28	1.88	4.26	3.32	0.00784536	2.26878	up	--	--	--	--	--	--	--	--	T	Signal transduction mechanisms	hypothetical protein DCAR_029669 [Daucus carota subsp. sativus]
c88945.graph_c0	371	357	275	143	145	122	14.78	16.17	12.9	6.79	6.54	5.32	2.63002e-05	-1.34089	down	[R]	General function prediction only	Cellular Component: integral component of membrane (GO:0016021);; Molecular Function: inositol 2-dehydrogenase activity (GO:0050112);; Biological Process: oxidation-reduction process (GO:0055114);;	--	[GQ]	--	Oxidoreductase family, C-terminal alpha/beta domain;; Oxidoreductase family, NAD-binding Rossmann fold;; Oxidoreductase family, NAD-binding Rossmann fold	--	S	Function unknown	PREDICTED: inositol 2-dehydrogenase 2 [Daucus carota subsp. sativus]
c73874.graph_c0	440	515	238	126	26	123	24.29	31.07	14.45	7.71	1.49	7.02	0.00603917	-1.89474	down	[G]	Carbohydrate transport and metabolism	Molecular Function: transporter activity (GO:0005215);; Biological Process: transport (GO:0006810);; Cellular Component: integral component of membrane (GO:0016021);;	K09874|5.78482e-116|gra:105802467|K09874 aquaporin NIP | (RefSeq) aquaporin NIP2-1-like	[G]	Carbohydrate transport and metabolism	Major intrinsic protein	Aquaporin NIP2-1 OS=Zea mays OX=4577 GN=NIP2-1 PE=2 SV=2	G	Carbohydrate transport and metabolism	PREDICTED: aquaporin NIP2-2-like [Daucus carota subsp. sativus]
c89153.graph_c0	1073	815	953	490	525	452	40.97	33.54	42.09	22.08	21.34	17.82	1.97574e-06	-1.02029	down	--	--	Molecular Function: DNA binding (GO:0003677);; Biological Process: transcription from RNA polymerase II promoter (GO:0006366);;	--	--	--	Helix-loop-helix DNA-binding domain	Transcription factor bHLH130 OS=Arabidopsis thaliana OX=3702 GN=BHLH130 PE=1 SV=1	K	Transcription	PREDICTED: transcription factor bHLH130 [Daucus carota subsp. sativus]
c85164.graph_c0	6	8	9	25	51	43	0.22	0.31	0.37	1.02	1.97	1.56	0.00987272	1.92654	up	--	--	Biological Process: carbohydrate metabolic process (GO:0005975);; Molecular Function: polysaccharide binding (GO:0030247);; Molecular Function: glucan endo-1,3-beta-D-glucosidase activity (GO:0042973);; Cellular Component: anchored component of plasma membrane (GO:0046658);;	--	--	--	Glycosyl hydrolases family 17;; Glycosyl hydrolases family 17;; X8 domain	Glucan endo-1,3-beta-glucosidase 7 OS=Arabidopsis thaliana OX=3702 GN=At4g34480 PE=1 SV=2	G	Carbohydrate transport and metabolism	PREDICTED: glucan endo-1,3-beta-D-glucosidase-like [Daucus carota subsp. sativus]
c91105.graph_c1	700	418	994	1314	2035	2263	55.26	37.02	93.6	125.96	188.7	206.23	0.00232122	1.27385	up	[QV]	Secondary metabolites biosynthesis, transport and catabolism ;; Defense mechanisms	Molecular Function: monooxygenase activity (GO:0004497);; Molecular Function: iron ion binding (GO:0005506);; Cellular Component: integral component of membrane (GO:0016021);; Molecular Function: oxidoreductase activity, acting on paired donors, with incorporation or reduction of molecular oxygen (GO:0016705);; Molecular Function: heme binding (GO:0020037);; Biological Process: oxidation-reductio…	--	[QI]	--	Cytochrome P450;; Cytochrome P450	Cytochrome P450 CYP72A219 OS=Panax ginseng OX=4054 PE=2 SV=1	Q	Secondary metabolites biosynthesis, transport and catabolism	PREDICTED: cytochrome P450 CYP72A219-like [Daucus carota subsp. sativus]
c84190.graph_c0	50	20	32	101	88	138	1.7	0.73	1.25	4.05	3.27	5.04	0.00919533	1.50314	up	--	--	--	--	--	--	Senescence regulator	--	S	Function unknown	PREDICTED: uncharacterized protein LOC108219023 [Daucus carota subsp. sativus]
c86669.graph_c0	3255	4587	3259	1559	1099	1198	79.59	123.03	88.83	53.94	31.71	38.47	8.98197e-06	-1.55631	down	[E]	Amino acid transport and metabolism	Molecular Function: 6-phosphofructo-2-kinase activity (GO:0003873);; Molecular Function: ATP binding (GO:0005524);; Cellular Component: cytosol (GO:0005829);; Cellular Component: plasma membrane (GO:0005886);; Biological Process: fructose metabolic process (GO:0006000);; Biological Process: fructose 6-phosphate metabolic process (GO:0006002);; Biological Process: fructose 2,6-bisphosphate metabol…	K01103|0|vvi:100244966|K01103 6-phosphofructo-2-kinase / fructose-2,6-biphosphatase 3&#160; [EC:2.7.1.105 3.1.3.46] | (RefSeq) 6-phosphofructo-2-kinase/fructose-2,6-bisphosphatase	[G]	Carbohydrate transport and metabolism	6-phosphofructo-2-kinase;; Histidine phosphatase superfamily (branch 1);; AAA domain;; Starch binding domain	6-phosphofructo-2-kinase/fructose-2,6-bisphosphatase OS=Arabidopsis thaliana OX=3702 GN=FKFBP PE=1 SV=1	G	Carbohydrate transport and metabolism	PREDICTED: 6-phosphofructo-2-kinase/fructose-2,6-bisphosphatase isoform X1 [Daucus carota subsp. sativus]
c80622.graph_c0	18	10	56	324	920	1013	0.74	0.38	2.57	16.4	42.99	46.56	1.60602e-12	4.07307	up	--	--	Molecular Function: protein serine/threonine phosphatase activity (GO:0004722);; Biological Process: protein dephosphorylation (GO:0006470);; Molecular Function: metal ion binding (GO:0046872);;	K14497|1.29087e-10|gra:105788786|K14497 protein phosphatase 2C [EC:3.1.3.16] | (RefSeq) probable protein phosphatase 2C 24	[T]	Signal transduction mechanisms	Protein phosphatase 2C	Protein phosphatase 2C 3 OS=Arabidopsis thaliana OX=3702 GN=AIP1 PE=1 SV=1	T	Signal transduction mechanisms	PREDICTED: probable protein phosphatase 2C 24 [Daucus carota subsp. sativus]
c82906.graph_c0	2275	1792	2318	4348	5262	5220	53.75	45.16	61.74	117.75	131.9	126.99	1.12676e-08	1.11909	up	[I]	Lipid transport and metabolism	Molecular Function: catalytic activity (GO:0003824);; Biological Process: metabolic process (GO:0008152);; Cellular Component: integral component of membrane (GO:0016021);;	K01897|0|jcu:105641541|K01897 long-chain acyl-CoA synthetase [EC:6.2.1.3] | (RefSeq) long chain acyl-CoA synthetase 8	[I]	Lipid transport and metabolism	AMP-binding enzyme;; AMP-binding enzyme	Long chain acyl-CoA synthetase 9, chloroplastic OS=Arabidopsis thaliana OX=3702 GN=LACS9 PE=1 SV=1	I	Lipid transport and metabolism	PREDICTED: long chain acyl-CoA synthetase 8-like [Daucus carota subsp. sativus]
c84899.graph_c1	815	1188	700	218	47	123	31.27	49.33	30.91	9.23	1.97	4.83	7.73991e-06	-2.55626	down	--	--	--	--	--	--	NPH3 family	BTB/POZ domain-containing protein SR1IP1 OS=Arabidopsis thaliana OX=3702 GN=SR1IP1 PE=1 SV=2	S	Function unknown	PREDICTED: BTB/POZ domain-containing protein At5g67385-like isoform X1 [Daucus carota subsp. sativus]
c76553.graph_c0	103	121	91	46	42	46	7.7	9.73	7.81	4.07	3.45	3.68	0.00987272	-1.25214	down	--	--	Molecular Function: catalytic activity (GO:0003824);;	K16055|7.90096e-39|egr:104450066|K16055 trehalose 6-phosphate synthase/phosphatase [EC:2.4.1.15 3.1.3.12] | (RefSeq) alpha,alpha-trehalose-phosphate synthase [UDP-forming] 1	[G]	Carbohydrate transport and metabolism	--	Alpha,alpha-trehalose-phosphate synthase [UDP-forming] 1 OS=Arabidopsis thaliana OX=3702 GN=TPS1 PE=1 SV=1	G	Carbohydrate transport and metabolism	hypothetical protein DCAR_017588 [Daucus carota subsp. sativus]
c81828.graph_c0	6754	8937	4072	1353	627	1103	330.08	470.34	228.86	78.13	33.37	57.52	1.00838e-08	-2.57155	down	[G]	Carbohydrate transport and metabolism	Molecular Function: hydrolase activity, hydrolyzing O-glycosyl compounds (GO:0004553);; Cellular Component: cell wall (GO:0005618);; Biological Process: xyloglucan metabolic process (GO:0010411);; Molecular Function: xyloglucan:xyloglucosyl transferase activity (GO:0016762);; Molecular Function: carbohydrate binding (GO:0030246);; Biological Process: cell wall biogenesis (GO:0042546);; Cellular C…	K08235|0|sind:105177854|K08235 xyloglucan:xyloglucosyl transferase [EC:2.4.1.207] | (RefSeq) probable xyloglucan endotransglucosylase/hydrolase protein 7	--	--	Glycosyl hydrolases family 16;; Xyloglucan endo-transglycosylase (XET) C-terminus	Probable xyloglucan endotransglucosylase/hydrolase protein 7 OS=Arabidopsis thaliana OX=3702 GN=XTH7 PE=2 SV=2	G	Carbohydrate transport and metabolism	PREDICTED: probable xyloglucan endotransglucosylase/hydrolase protein 7 [Daucus carota subsp. sativus]
c76742.graph_c0	501	257	429	1472	1600	1780	34.61	19.17	34.07	120.49	121.71	131.66	2.1647e-11	1.91593	up	--	--	--	--	--	--	--	--	S	Function unknown	PREDICTED: uncharacterized protein At5g48480-like [Daucus carota subsp. sativus]
c84331.graph_c0	447	391	337	190	113	115	25.08	23.67	21.71	12.6	6.95	6.88	0.000248842	-1.48548	down	[I]	Lipid transport and metabolism	--	--	[V]	Defense mechanisms	alpha/beta hydrolase fold;; alpha/beta hydrolase fold;; Carboxylesterase family	Probable carboxylesterase 13 OS=Arabidopsis thaliana OX=3702 GN=CXE13 PE=1 SV=1	I	Lipid transport and metabolism	PREDICTED: probable carboxylesterase 13 [Daucus carota subsp. sativus]
c91499.graph_c1	7446	9104	8286	4302	5533	3257	77.65	101.77	99.65	51.51	62.46	35.39	0.000977083	-1.01172	down	[E]	Amino acid transport and metabolism	Cellular Component: cytoplasm (GO:0005737);; Biological Process: glutamate biosynthetic process (GO:0006537);; Molecular Function: glutamate synthase (ferredoxin) activity (GO:0016041);; Biological Process: ammonia assimilation cycle (GO:0019676);; Biological Process: oxidation-reduction process (GO:0055114);;	K00284|0|vvi:100233082|K00284 glutamate synthase (ferredoxin) [EC:1.4.7.1] | (RefSeq) ferredoxin-dependent glutamate synthase, chloroplastic	[E]	Amino acid transport and metabolism	Glutamine amidotransferases class-II;; Glutamate synthase central domain;; Conserved region in glutamate synthase;; GXGXG motif	Ferredoxin-dependent glutamate synthase 1, chloroplastic/mitochondrial OS=Arabidopsis thaliana OX=3702 GN=GLU1 PE=1 SV=3	E	Amino acid transport and metabolism	ferredoxin-dependent glutamate synthase, chloroplastic [Quercus suber]
c87868.graph_c0	149	133	86	46	38	42	6.33	5.3	3.8	2.17	1.87	2.31	0.00169097	-1.52558	down	--	--	--	--	--	--	--	--	S	Function unknown	PREDICTED: uncharacterized protein LOC108208175 [Daucus carota subsp. sativus]
c92211.graph_c0	699	1097	767	452	304	400	17.89	26.11	19.9	14.76	8.38	9.45	0.00636982	-1.18331	down	[O]	Posttranslational modification, protein turnover, chaperones	Molecular Function: protein serine/threonine kinase activity (GO:0004674);; Molecular Function: ATP binding (GO:0005524);; Biological Process: protein phosphorylation (GO:0006468);; Cellular Component: integral component of membrane (GO:0016021);; Biological Process: cellulose biosynthetic process (GO:0030244);;	--	--	--	Protein kinase domain;; Protein tyrosine kinase;; Leucine rich repeat N-terminal domain;; Leucine Rich repeats (2 copies);; Subtilase family;; Protein tyrosine kinase;; Subtilase family	LRR receptor-like serine/threonine-protein kinase FEI 1 OS=Arabidopsis thaliana OX=3702 GN=FEI1 PE=1 SV=1	T	Signal transduction mechanisms	PREDICTED: LRR receptor-like serine/threonine-protein kinase FEI 2 isoform X1 [Daucus carota subsp. sativus]
c85341.graph_c0	1730	848	1006	128	65	94	87.18	46.41	58.84	7.71	3.71	5.12	1.32262e-19	-3.47723	down	--	--	--	K14496|7.34851e-102|jcu:105648096|K14496 abscisic acid receptor PYR/PYL family | (RefSeq) abscisic acid receptor PYL4	--	--	Polyketide cyclase / dehydrase and lipid transport;; Pathogenesis-related protein Bet v I family	Abscisic acid receptor PYL4 OS=Arabidopsis thaliana OX=3702 GN=PYL4 PE=1 SV=1	S	Function unknown	PREDICTED: abscisic acid receptor PYL4-like [Daucus carota subsp. sativus]
c74127.graph_c0	61	44	65	10	14	8	7.17	5.68	8.94	1.44	1.87	1.06	0.000115504	-2.24376	down	--	--	--	--	--	--	--	--	--	--	hypothetical protein DCAR_027890 [Daucus carota subsp. sativus]
c78673.graph_c0	7375	5497	5284	3325	2350	2752	437.36	350.14	359.74	232.58	152.55	173.98	0.000258765	-1.13793	down	--	--	--	--	--	--	zinc-finger of the FCS-type, C2-C2	Protein MARD1 OS=Arabidopsis thaliana OX=3702 GN=MARD1 PE=2 SV=2	S	Function unknown	PREDICTED: uncharacterized protein LOC108211084 [Daucus carota subsp. sativus]
c86718.graph_c0	43	57	73	240	712	653	0.67	1.27	1.65	4.1	11.23	10.14	4.36381e-10	2.86668	up	--	--	Molecular Function: signal transducer activity (GO:0004871);; Biological Process: signal transduction (GO:0007165);; Biological Process: animal organ development (GO:0048513);; Biological Process: auxin transport (GO:0060918);;	--	--	--	NPH3 family;; BTB/POZ domain	BTB/POZ domain-containing protein NPY1 OS=Arabidopsis thaliana OX=3702 GN=NPY1 PE=2 SV=1	S	Function unknown	PREDICTED: BTB/POZ domain-containing protein NPY1 isoform X1 [Daucus carota subsp. sativus]
c88452.graph_c0	1168	1568	1445	485	851	611	34.24	49.57	48.4	17.69	26.38	18.84	0.000232809	-1.1913	down	[T]	Signal transduction mechanisms	Molecular Function: voltage-gated potassium channel activity (GO:0005249);; Cellular Component: integral component of membrane (GO:0016021);; Biological Process: potassium ion transmembrane transport (GO:0071805);;	--	[PT]	--	KHA, dimerisation domain of potassium ion channel;; Cyclic nucleotide-binding domain;; Ion channel;; Ankyrin repeats (3 copies);; Ion transport protein;; Ankyrin repeats (many copies);; Ankyrin repeat;; Ankyrin repeats (many copies);; Ankyrin repeat	Potassium channel KAT1 OS=Arabidopsis thaliana OX=3702 GN=KAT1 PE=1 SV=2	U	Intracellular trafficking, secretion, and vesicular transport	inwardly rectifying potassium channel subunit [Daucus carota]
c86904.graph_c0	171	180	138	62	19	44	7.65	7.63	6.57	3.68	0.98	1.93	0.0021285	-1.82756	down	[G]	Carbohydrate transport and metabolism	Cellular Component: membrane (GO:0016020);; Molecular Function: lyase activity (GO:0016829);;	K01728|8.56619e-178|sot:102578838|K01728 pectate lyase [EC:4.2.2.2] | (RefSeq) probable pectate lyase 13	--	--	Pectate lyase	Probable pectate lyase 13 OS=Arabidopsis thaliana OX=3702 GN=PMR6 PE=1 SV=1	G	Carbohydrate transport and metabolism	hypothetical protein DCAR_006400 [Daucus carota subsp. sativus]
c72725.graph_c0	520	130	763	1972	4214	4448	43.5	11.68	70.83	193.26	379.59	396.85	3.79174e-06	2.56516	up	--	--	--	--	--	--	--	--	--	--	hypothetical protein DCAR_022511 [Daucus carota subsp. sativus]
c86849.graph_c1	5218	3246	1713	1254	203	855	115.81	77.31	45.75	33.22	6.39	22.6	0.00745035	-1.87449	down	--	--	Cellular Component: extracellular region (GO:0005576);; Cellular Component: cell wall (GO:0005618);; Biological Process: plant-type cell wall organization (GO:0009664);; Biological Process: unidimensional cell growth (GO:0009826);; Cellular Component: membrane (GO:0016020);; Biological Process: primary root development (GO:0080022);;	--	--	--	Pollen allergen;; Lytic transglycolase;; EF hand;; EF hand;; EF-hand domain;; EF-hand domain pair;; EF-hand domain pair	Expansin-A5 OS=Arabidopsis thaliana OX=3702 GN=EXPA5 PE=2 SV=1	G	Carbohydrate transport and metabolism	PREDICTED: expansin-A1-like [Daucus carota subsp. sativus]
c79302.graph_c0	89	77	57	13	26	6	5.43	5.05	3.99	0.94	1.74	0.39	0.00103422	-2.13749	down	--	--	--	--	--	--	--	Protein NLP2 OS=Arabidopsis thaliana OX=3702 GN=NLP2 PE=2 SV=3	S	Function unknown	PREDICTED: protein NLP2-like [Daucus carota subsp. sativus]
c92846.graph_c1	2087	1783	2168	4666	9807	5307	27.08	24.87	32.23	72.4	140.47	74.25	2.90906e-07	1.54937	up	[G]	Carbohydrate transport and metabolism	Molecular Function: ATP binding (GO:0005524);; Molecular Function: kinase activity (GO:0016301);; Biological Process: phosphorylation (GO:0016310);;	K08244|0|pop:POPTR_0010s05400g|K08244 alpha-glucan, water dikinase [EC:2.7.9.4] | (RefSeq) POPTRDRAFT_1089922; hypothetical protein	--	--	Pyruvate phosphate dikinase, PEP/pyruvate binding domain	Alpha-glucan water dikinase, chloroplastic OS=Citrus reticulata OX=85571 GN=R1 PE=2 SV=1	S	Function unknown	PREDICTED: alpha-glucan water dikinase, chloroplastic isoform X1 [Daucus carota subsp. sativus]
c80282.graph_c0	219	170	380	666	1242	1183	10.39	8.82	20.8	37.54	65.09	60.58	7.10299e-06	1.81864	up	--	--	--	K09419|2.52131e-93|sind:105160500|K09419 heat shock transcription factor, other eukaryote | (RefSeq) heat stress transcription factor B-2a-like	[K]	Transcription	HSF-type DNA-binding	Heat stress transcription factor B-2a OS=Arabidopsis thaliana OX=3702 GN=HSFB2A PE=2 SV=1	K	Transcription	PREDICTED: heat stress transcription factor B-2a-like [Daucus carota subsp. sativus]
c92295.graph_c0	18718	12623	14929	7687	5982	5448	311.96	230.82	291	219.75	134.94	150.39	3.47862e-06	-1.30644	down	--	--	Cellular Component: integral component of membrane (GO:0016021);;	--	--	--	--	Protein CHUP1, chloroplastic OS=Arabidopsis thaliana OX=3702 GN=CHUP1 PE=1 SV=1	S	Function unknown	PREDICTED: protein CHUP1, chloroplastic [Daucus carota subsp. sativus]
c85102.graph_c1	187	116	242	350	566	467	6.08	3.94	9.1	13.29	20.62	16.14	0.00195362	1.2079	up	--	--	Molecular Function: structural constituent of ribosome (GO:0003735);; Cellular Component: mitochondrial inner membrane (GO:0005743);; Biological Process: translation (GO:0006412);; Molecular Function: coenzyme A transmembrane transporter activity (GO:0015228);; Cellular Component: integral component of membrane (GO:0016021);; Biological Process: coenzyme A transmembrane transport (GO:0035349);;	--	[C]	Energy production and conversion	Mitochondrial carrier protein	Mitochondrial carrier protein CoAc1 OS=Arabidopsis thaliana OX=3702 GN=COAC1 PE=2 SV=1	S	Function unknown	PREDICTED: mitochondrial substrate carrier family protein P [Daucus carota subsp. sativus]
c77406.graph_c0	50	83	30	150	204	185	2.76	5.37	1.99	11.34	14.37	12.58	0.00955183	1.47566	up	--	--	Molecular Function: DNA binding (GO:0003677);; Cellular Component: nucleus (GO:0005634);;	--	--	--	SBP domain;; SBP domain	Squamosa promoter-binding-like protein 4 OS=Arabidopsis thaliana OX=3702 GN=SPL4 PE=1 SV=1	S	Function unknown	PREDICTED: squamosa promoter-binding protein 1-like [Daucus carota subsp. sativus]
c68042.graph_c0	25	128	72	16	14	6	2.12	11.21	6.93	1.6	1.31	0.54	0.00490076	-2.26595	down	--	--	Cellular Component: integral component of membrane (GO:0016021);;	--	--	--	Hydrophobic seed protein;; Protease inhibitor/seed storage/LTP family;; Probable lipid transfer	14 kDa proline-rich protein DC2.15 OS=Daucus carota OX=4039 PE=2 SV=1	S	Function unknown	PREDICTED: 14 kDa proline-rich protein DC2.15-like [Daucus carota subsp. sativus]
c69858.graph_c1	289	386	315	78	71	50	66.52	95.07	83.1	21.65	18.82	12.42	2.03816e-10	-2.3103	down	--	--	Biological Process: glucose metabolic process (GO:0006006);; Cellular Component: chloroplast (GO:0009507);; Biological Process: reductive pentose-phosphate cycle (GO:0019253);; Molecular Function: glyceraldehyde-3-phosphate dehydrogenase (NADP+) (phosphorylating) activity (GO:0047100);; Molecular Function: NADP binding (GO:0050661);; Molecular Function: NAD binding (GO:0051287);; Biological Proce…	K05298|1.01281e-21|nnu:104592682|K05298 glyceraldehyde-3-phosphate dehydrogenase (NADP+) (phosphorylating) [EC:1.2.1.13] | (RefSeq) glyceraldehyde-3-phosphate dehydrogenase A, chloroplastic	[G]	Carbohydrate transport and metabolism	--	Glyceraldehyde-3-phosphate dehydrogenase A, chloroplastic (Fragment) OS=Nicotiana tabacum OX=4097 GN=GAPA PE=2 SV=1	G	Carbohydrate transport and metabolism	PREDICTED: glyceraldehyde-3-phosphate dehydrogenase A, chloroplastic [Daucus carota subsp. sativus]
c85851.graph_c0	2358	2431	2282	1329	1000	1022	46.34	51.36	51.04	27.58	22.18	19.02	0.000138911	-1.12756	down	[L]	Replication, recombination and repair	Molecular Function: DNA binding (GO:0003677);; Molecular Function: ATP binding (GO:0005524);; Cellular Component: chloroplast stroma (GO:0009570);; Cellular Component: chloroplast envelope (GO:0009941);; Molecular Function: hydrolase activity (GO:0016787);;	--	[L]	Replication, recombination and repair	AAA domain;; AAA domain;; AAA domain;; AAA domain;; Helicase;; AAA domain	Regulator of nonsense transcripts 1 homolog OS=Arabidopsis thaliana OX=3702 GN=UPF1 PE=1 SV=2	L	Replication, recombination and repair	PREDICTED: DNA-binding protein SMUBP-2 [Daucus carota subsp. sativus]
c90246.graph_c0	9826	18901	10436	6621	3589	4599	223.42	462.46	271.47	177.49	87.92	111.54	0.00428562	-1.40591	down	[E]	Amino acid transport and metabolism	Molecular Function: glutamate-ammonia ligase activity (GO:0004356);; Molecular Function: ATP binding (GO:0005524);; Biological Process: glutamine biosynthetic process (GO:0006542);; Cellular Component: chloroplast (GO:0009507);;	K01915|0|sind:105171412|K01915 glutamine synthetase [EC:6.3.1.2] | (RefSeq) glutamine synthetase leaf isozyme, chloroplastic	[E]	Amino acid transport and metabolism	Glutamine synthetase, catalytic domain;; Glutamine synthetase, beta-Grasp domain;; AWPM-19-like family;; AWPM-19-like family	Glutamine synthetase, chloroplastic OS=Daucus carota OX=4039 GN=GLN2 PE=2 SV=1	E	Amino acid transport and metabolism	PREDICTED: glutamine synthetase, chloroplastic [Daucus carota subsp. sativus]
c85649.graph_c0	356	193	423	442	1308	1071	16.55	10	22.5	24.09	66.59	53.51	0.00851108	1.34781	up	[M]	Cell wall/membrane/envelope biogenesis	Molecular Function: calmodulin-dependent protein kinase activity (GO:0004683);; Molecular Function: calmodulin binding (GO:0005516);; Molecular Function: ATP binding (GO:0005524);; Cellular Component: nucleus (GO:0005634);; Cellular Component: cytoplasm (GO:0005737);; Cellular Component: plasma membrane (GO:0005886);; Biological Process: abscisic acid-activated signaling pathway (GO:0009738);; Mo…	--	[T]	Signal transduction mechanisms	Protein kinase domain;; Protein tyrosine kinase	Phosphoenolpyruvate carboxylase kinase 2 OS=Arabidopsis thaliana OX=3702 GN=PPCK2 PE=1 SV=2	T	Signal transduction mechanisms	hypothetical protein DCAR_001956 [Daucus carota subsp. sativus]
c76934.graph_c0	98	236	134	30	24	52	4.08	10.58	6.4	1.47	1.09	2.31	0.00105076	-2.01279	down	--	--	Molecular Function: transferase activity (GO:0016740);;	K19861|8.392e-153|vvi:100243166|K19861 benzyl alcohol O-benzoyltransferase [EC:2.3.1.196 2.3.1.232] | (RefSeq) methanol O-anthraniloyltransferase	--	--	Transferase family	Methanol O-anthraniloyltransferase OS=Vitis labrusca OX=103355 GN=AMAT PE=1 SV=1	S	Function unknown	methanol O-anthraniloyltransferase-like [Hevea brasiliensis]
c82258.graph_c1	39	365	92	6	0	2	2.82	27.91	7.42	0.45	0	0.13	2.64049e-07	-4.19424	down	--	--	--	--	--	--	--	Transcription factor PAR1 OS=Arabidopsis thaliana OX=3702 GN=PAR1 PE=1 SV=1	S	Function unknown	PREDICTED: transcription factor PAR1 [Daucus carota subsp. sativus]
c77900.graph_c0	132	129	122	49	80	54	8.24	8.5	8.65	3.55	5.4	3.52	0.00818916	-1.12342	down	--	--	--	K14376|4.09337e-26|pmum:103338749|K14376 poly(A) polymerase [EC:2.7.7.19] | (RefSeq) nuclear poly(A) polymerase 1	[A]	RNA processing and modification	--	Nuclear poly(A) polymerase 1 OS=Arabidopsis thaliana OX=3702 GN=PAPS1 PE=1 SV=1	A	RNA processing and modification	PREDICTED: nuclear poly(A) polymerase 1 isoform X1 [Daucus carota subsp. sativus]
c83765.graph_c1	115	125	159	251	418	250	9.61	11.52	14.54	24.38	32.37	19.85	0.00754734	1.05057	up	[O]	Posttranslational modification, protein turnover, chaperones	Molecular Function: ATP binding (GO:0005524);; Cellular Component: mitochondrion (GO:0005739);; Biological Process: protein folding (GO:0006457);; Molecular Function: unfolded protein binding (GO:0051082);;	K03283|5.4713e-175|pop:POPTR_0009s08320g|K03283 heat shock 70kDa protein 1/8 | (RefSeq) POPTRDRAFT_833144; heat shock protein 70	[O]	Posttranslational modification, protein turnover, chaperones	Hsp70 protein;; Hsp70 protein;; NAD-specific glutamate dehydrogenase	Heat shock 70 kDa protein, mitochondrial OS=Phaseolus vulgaris OX=3885 PE=2 SV=1	O	Posttranslational modification, protein turnover, chaperones	PREDICTED: heat shock 70 kDa protein, mitochondrial [Daucus carota subsp. sativus]
c62239.graph_c0	63	15	54	210	210	225	4.86	1.23	4.74	17.91	17.12	18.32	0.000101692	2.06006	up	--	--	--	--	--	--	--	--	--	--	hypothetical protein DCAR_008027 [Daucus carota subsp. sativus]
c85888.graph_c0	283	275	147	76	42	74	8.67	8.93	5.12	2.71	1.32	2.4	0.00041244	-1.80212	down	[J]	Translation, ribosomal structure and biogenesis	Molecular Function: aminoacyl-tRNA ligase activity (GO:0004812);; Molecular Function: ATP binding (GO:0005524);; Biological Process: tRNA aminoacylation for protein translation (GO:0006418);;	--	--	--	Salt stress response/antifungal;; tRNA synthetases class II (D, K and N)	Cysteine-rich repeat secretory protein 55 OS=Arabidopsis thaliana OX=3702 GN=CRRSP55 PE=2 SV=1	S	Function unknown	PREDICTED: cysteine-rich repeat secretory protein 55 [Daucus carota subsp. sativus]
c78761.graph_c0	122	100	118	26	24	20	11.43	10.08	12.69	2.89	2.48	2.01	8.45599e-08	-2.23024	down	--	--	Cellular Component: membrane (GO:0016020);;	--	--	--	--	Protein GLUTAMINE DUMPER 3 OS=Arabidopsis thaliana OX=3702 GN=GDU3 PE=2 SV=1	U	Intracellular trafficking, secretion, and vesicular transport	PREDICTED: protein GLUTAMINE DUMPER 3-like [Daucus carota subsp. sativus]
c82954.graph_c0	245	160	149	90	67	59	6.05	4.26	4.23	2.61	1.8	1.55	0.00257492	-1.35011	down	[G]	Carbohydrate transport and metabolism	Biological Process: flavonoid biosynthetic process (GO:0009813);; Cellular Component: intracellular membrane-bounded organelle (GO:0043231);; Biological Process: flavonoid glucuronidation (GO:0052696);; Molecular Function: quercetin 3-O-glucosyltransferase activity (GO:0080043);; Molecular Function: quercetin 7-O-glucosyltransferase activity (GO:0080044);;	--	[GC]	--	UDP-glucoronosyl and UDP-glucosyl transferase	Beta-D-glucosyl crocetin beta-1,6-glucosyltransferase OS=Gardenia jasminoides OX=114476 GN=UGT94E5 PE=1 SV=1	S	Function unknown	PREDICTED: beta-D-glucosyl crocetin beta-1,6-glucosyltransferase-like [Daucus carota subsp. sativus]
c85339.graph_c0	3254	1998	2931	1288	932	1135	137.92	91.89	142.39	64.47	43.9	51.32	2.88967e-05	-1.30227	down	--	--	--	--	--	--	Helix-loop-helix DNA-binding domain	Transcription factor UNE10 OS=Arabidopsis thaliana OX=3702 GN=UNE10 PE=2 SV=1	K	Transcription	hypothetical protein DCAR_025094 [Daucus carota subsp. sativus]
c81797.graph_c0	456	1296	822	111	58	81	13.46	41.38	27.93	3.91	1.79	2.56	1.13873e-10	-3.17436	down	--	--	--	--	--	--	IQ calmodulin-binding motif;; Protein of unknown function (DUF4005)	Protein IQ-DOMAIN 14 OS=Arabidopsis thaliana OX=3702 GN=IQD14 PE=1 SV=1	S	Function unknown	PREDICTED: protein IQ-DOMAIN 14-like [Daucus carota subsp. sativus]
c87744.graph_c0	163	177	212	289	441	517	4.34	5.04	6.43	9.15	12.73	14.4	0.00922981	1.03836	up	--	--	--	K18749|3.7974e-123|cic:CICLE_v10011356mg|K18749 protein LSM14 | (RefSeq) hypothetical protein	[U]	Intracellular trafficking, secretion, and vesicular transport	Scd6-like Sm domain;; FDF domain;; Ataxin 2 SM domain	Protein decapping 5 OS=Arabidopsis thaliana OX=3702 GN=DCP5 PE=1 SV=1	S	Function unknown	PREDICTED: protein decapping 5-like [Daucus carota subsp. sativus]
c73373.graph_c0	17	17	21	41	116	137	2.56	2.79	3.63	7.41	19.37	21.98	0.00128886	2.04738	up	--	--	--	--	--	--	Cleavage site for pathogenic type III effector avirulence factor Avr	RPM1-interacting protein 4 OS=Arabidopsis thaliana OX=3702 GN=RIN4 PE=1 SV=1	S	Function unknown	PREDICTED: RPM1-interacting protein 4-like isoform X1 [Daucus carota subsp. sativus]
c86009.graph_c0	4294	4164	2925	2218	1366	1899	154.91	163.61	120.36	96.78	53.71	73.61	0.00701982	-1.0791	down	--	--	Biological Process: single-organism metabolic process (GO:0044710);;	--	[O]	Posttranslational modification, protein turnover, chaperones	Thioredoxin	Thioredoxin-like 3-1, chloroplastic OS=Arabidopsis thaliana OX=3702 GN=WCRKC1 PE=2 SV=3	O	Posttranslational modification, protein turnover, chaperones	PREDICTED: thioredoxin-like 3-1, chloroplastic isoform X2 [Daucus carota subsp. sativus]
c90125.graph_c0	432	504	359	166	114	132	11.64	14.62	11.09	5.26	3.34	3.78	8.09964e-06	-1.66266	down	--	--	Cellular Component: chloroplast (GO:0009507);;	--	[R]	General function prediction only	PPR repeat family;; PPR repeat;; Pentatricopeptide repeat domain;; PPR repeat;; Pentacotripeptide-repeat region of PRORP	Pentatricopeptide repeat-containing protein At5g46580, chloroplastic OS=Arabidopsis thaliana OX=3702 GN=At5g46580 PE=2 SV=1	S	Function unknown	PREDICTED: pentatricopeptide repeat-containing protein At5g46580, chloroplastic-like [Daucus carota subsp. sativus]
c74584.graph_c0	53	63	30	12	2	2	5.13	7.29	2.83	2.09	0.37	0.1	0.00395113	-2.4843	down	--	--	--	--	--	--	--	--	--	--	PREDICTED: histidine kinase 4-like isoform X1 [Daucus carota subsp. sativus]
c80551.graph_c0	406	213	378	606	881	919	11.54	7.21	12.61	21.41	27.23	30.9	0.00110447	1.15866	up	--	--	--	--	[L]	Replication, recombination and repair	--	--	S	Function unknown	PREDICTED: uncharacterized protein LOC104905313 isoform X1 [Beta vulgaris subsp. vulgaris]
c84155.graph_c0	881	1982	949	447	151	419	63.11	147.74	76.19	38.61	12.45	33.23	0.00311459	-1.79637	down	--	--	--	--	--	--	--	Gibberellin-regulated protein 6 OS=Arabidopsis thaliana OX=3702 GN=GASA6 PE=3 SV=1	S	Function unknown	PREDICTED: gibberellin-regulated protein 6-like [Daucus carota subsp. sativus]
c83037.graph_c0	180	486	280	111	79	85	10.89	17.12	14.96	9.5	10.16	10.76	0.00153905	-1.74337	down	[H]	Coenzyme transport and metabolism	Molecular Function: catalytic activity (GO:0003824);; Cellular Component: cytosol (GO:0005829);; Cellular Component: plasma membrane (GO:0005886);; Biological Process: cellular amino acid metabolic process (GO:0006520);; Biological Process: response to lipid hydroperoxide (GO:0006982);; Biological Process: response to UV-B (GO:0010224);; Biological Process: response to non-ionic osmotic stress (G…	K06215|1.92989e-41|sot:102590002|K06215 pyridoxal 5'-phosphate synthase pdxS subunit [EC:4.3.3.6] | (RefSeq) probable pyridoxal 5'-phosphate synthase subunit PDX1	[H]	Coenzyme transport and metabolism	Myb-like DNA-binding domain;; Myb-like DNA-binding domain	Probable pyridoxal 5&apos;-phosphate synthase subunit PDX1 OS=Hevea brasiliensis OX=3981 GN=PDX1 PE=2 SV=1	H	Coenzyme transport and metabolism	probable pyridoxal 5&apos;-phosphate synthase subunit PDX1 [Spinacia oleracea]
c76455.graph_c0	320	266	281	102	108	103	33.42	28.84	34.34	12.82	12.43	11.21	2.69595e-08	-1.51727	down	--	--	Molecular Function: calmodulin binding (GO:0005516);; Cellular Component: nucleus (GO:0005634);; Molecular Function: zinc ion binding (GO:0008270);;	--	--	--	Zinc finger, C3HC4 type (RING finger);; Prokaryotic RING finger family 4;; Zinc finger, C3HC4 type (RING finger);; Zinc finger, C3HC4 type (RING finger)	--	S	Function unknown	PREDICTED: uncharacterized protein LOC108211664 [Daucus carota subsp. sativus]
c90637.graph_c0	423	370	708	1023	3169	1889	12.85	11.22	19.28	28.19	76.76	42.49	7.69878e-05	1.78217	up	[I]	Lipid transport and metabolism	--	--	[I]	Lipid transport and metabolism	Endonuclease/Exonuclease/phosphatase family;; Serine aminopeptidase, S33;; Alpha/beta hydrolase family	Type I inositol polyphosphate 5-phosphatase 10 OS=Arabidopsis thaliana OX=3702 GN=IP5P10 PE=3 SV=1	T	Signal transduction mechanisms	PREDICTED: type I inositol polyphosphate 5-phosphatase 10 isoform X1 [Daucus carota subsp. sativus]
c73002.graph_c0	403	254	325	751	1484	1283	25.11	17.41	23.42	54.14	102.5	87.36	9.00929e-08	1.69305	up	--	--	Cellular Component: vacuolar membrane (GO:0005774);; Cellular Component: plasma membrane (GO:0005886);; Biological Process: regulation of pH (GO:0006885);; Biological Process: response to salt stress (GO:0009651);; Molecular Function: sodium:proton antiporter activity (GO:0015385);; Cellular Component: integral component of membrane (GO:0016021);; Biological Process: sodium ion transmembrane tran…	--	[P]	Inorganic ion transport and metabolism	--	Sodium/hydrogen exchanger 1 OS=Arabidopsis thaliana OX=3702 GN=NHX1 PE=1 SV=2	P	Inorganic ion transport and metabolism	hypothetical protein DCAR_030567 [Daucus carota subsp. sativus]
c82612.graph_c0	3845	5167	3630	1232	288	646	182.95	266.54	198.02	68.4	15.26	32.73	1.36118e-05	-2.35667	down	--	--	--	--	[K]	Transcription	B-box zinc finger	Zinc finger protein CONSTANS-LIKE 16 OS=Arabidopsis thaliana OX=3702 GN=COL16 PE=1 SV=2	K	Transcription	PREDICTED: zinc finger protein CONSTANS-LIKE 16 [Daucus carota subsp. sativus]
c80727.graph_c0	6	38	34	2	1	0	0.37	2.52	2.3	0.15	0.06	0	0.00319089	-2.88524	down	--	--	--	--	--	--	--	--	S	Function unknown	PREDICTED: uncharacterized protein LOC108208910 [Daucus carota subsp. sativus]
c74110.graph_c0	1967	4219	2350	969	313	968	186.6	430.37	255.8	109.27	32.8	98.28	0.00218741	-1.81431	down	--	--	--	--	--	--	Probable lipid transfer;; Protease inhibitor/seed storage/LTP family	Putative lipid-transfer protein DIR1 OS=Arabidopsis thaliana OX=3702 GN=DIR1 PE=1 SV=1	S	Function unknown	hypothetical protein DCAR_018625 [Daucus carota subsp. sativus]
c78596.graph_c0	201	155	118	59	18	57	6.77	5.65	4.59	2.35	0.66	2.05	0.00996682	-1.66813	down	--	--	Biological Process: carbohydrate metabolic process (GO:0005975);; Cellular Component: integral component of membrane (GO:0016021);; Molecular Function: glucan endo-1,3-beta-D-glucosidase activity (GO:0042973);;	--	--	--	Glycosyl hydrolases family 17	Glucan endo-1,3-beta-glucosidase 14 OS=Arabidopsis thaliana OX=3702 GN=At2g27500 PE=1 SV=2	G	Carbohydrate transport and metabolism	PREDICTED: glucan endo-1,3-beta-glucosidase 14 [Daucus carota subsp. sativus]
c84771.graph_c0	229	206	247	425	563	725	12.14	12.06	15.26	27.1	33.55	43.47	0.000347642	1.20477	up	[E]	Amino acid transport and metabolism	Molecular Function: pyrroline-5-carboxylate reductase activity (GO:0004735);; Cellular Component: cell wall (GO:0005618);; Cellular Component: cytoplasm (GO:0005737);; Biological Process: oxidation-reduction process (GO:0055114);; Biological Process: L-proline biosynthetic process (GO:0055129);;	K00286|6.03888e-54|sly:101261090|K00286 pyrroline-5-carboxylate reductase [EC:1.5.1.2] | (RefSeq) pyrroline-5-carboxylate reductase	[E]	Amino acid transport and metabolism	NADP oxidoreductase coenzyme F420-dependent;; NAD binding domain of 6-phosphogluconate dehydrogenase;; Pyrroline-5-carboxylate reductase dimerisation	Pyrroline-5-carboxylate reductase OS=Actinidia chinensis OX=3625 PE=2 SV=1	E	Amino acid transport and metabolism	hypothetical protein DCAR_020545 [Daucus carota subsp. sativus]
c87262.graph_c0	333	224	313	510	791	623	15.88	11.56	17.17	28.91	41.18	32.07	0.000240787	1.03226	up	--	--	Molecular Function: hydrolase activity (GO:0016787);; Biological Process: RNA phosphodiester bond hydrolysis (GO:0090501);;	--	[S]	Function unknown	Alba;; Rpp20 subunit of nuclear RNase MRP and P	--	S	Function unknown	PREDICTED: translation initiation factor IF-2 [Daucus carota subsp. sativus]
c83971.graph_c0	7	20	26	0	1	0	0.31	0.97	1.34	0	0.05	0	0.0029963	-2.96721	down	--	--	--	--	--	--	bZIP transcription factor;; Basic region leucine zipper	Basic leucine zipper 61 OS=Arabidopsis thaliana OX=3702 GN=BZIP61 PE=1 SV=1	K	Transcription	PREDICTED: basic leucine zipper 61-like [Daucus carota subsp. sativus]
c78220.graph_c0	68	35	20	2	1	1	3.3	1.83	1.11	0.11	0.05	0.05	7.99797e-06	-3.59025	down	--	--	--	--	--	--	--	--	--	--	hypothetical protein DCAR_018853 [Daucus carota subsp. sativus]
c71026.graph_c2	148	137	115	43	72	61	22.99	22.87	20.52	8	12.53	10.19	0.00404662	-1.22962	down	--	--	--	--	--	--	Transcriptional activator	--	--	--	PREDICTED: uncharacterized protein LOC108215183 isoform X2 [Daucus carota subsp. sativus]
c81335.graph_c0	22	31	13	2	1	3	1.65	2.51	1.12	0.18	0.08	0.24	0.00665428	-2.52275	down	--	--	--	--	--	--	Late embryogenesis abundant protein	--	S	Function unknown	PREDICTED: late embryogenesis abundant protein At1g64065-like [Daucus carota subsp. sativus]
c91078.graph_c0	186	126	371	483	1146	1010	3.09	2.11	6.6	8.85	19.09	16.62	0.000781766	1.72007	up	--	--	--	--	--	--	Domain of unknown function (DUF4378);; Protein of unknown function (DUF3741)	--	S	Function unknown	PREDICTED: uncharacterized protein LOC108209247 isoform X1 [Daucus carota subsp. sativus]
c66463.graph_c0	60	114	74	10	11	10	5.21	10.32	7.34	0.9	0.95	0.95	1.44521e-06	-2.77428	down	[P]	Inorganic ion transport and metabolism	--	--	[P]	Inorganic ion transport and metabolism	Rhodanese-like domain	Thiosulfate sulfurtransferase 18 OS=Arabidopsis thaliana OX=3702 GN=STR18 PE=1 SV=1	P	Inorganic ion transport and metabolism	PREDICTED: thiosulfate sulfurtransferase 18-like isoform X2 [Daucus carota subsp. sativus]
c92582.graph_c1	278	167	406	664	906	755	6.85	4.71	13.15	25.9	24.87	25.8	0.000779545	1.3149	up	[P]	Inorganic ion transport and metabolism	Molecular Function: magnesium ion binding (GO:0000287);; Molecular Function: phospholipid-translocating ATPase activity (GO:0004012);; Molecular Function: ATP binding (GO:0005524);; Cellular Component: integral component of membrane (GO:0016021);; Biological Process: phospholipid translocation (GO:0045332);;	K01530|0|vvi:100252404|K01530 phospholipid-translocating ATPase [EC:3.6.3.1] | (RefSeq) phospholipid-transporting ATPase 2	[R]	General function prediction only	Phospholipid-translocating P-type ATPase C-terminal;; Phospholipid-translocating ATPase N-terminal;; haloacid dehalogenase-like hydrolase;; E1-E2 ATPase;; Cation transport ATPase (P-type)	Phospholipid-transporting ATPase 2 OS=Arabidopsis thaliana OX=3702 GN=ALA2 PE=1 SV=1	U	Intracellular trafficking, secretion, and vesicular transport	PREDICTED: phospholipid-transporting ATPase 2 isoform X1 [Daucus carota subsp. sativus]
c90140.graph_c0	654	489	842	1296	1457	1580	13.38	11.23	19.74	34.08	33.57	37.05	0.000806681	1.02472	up	--	--	--	K12200|0|sind:105156280|K12200 programmed cell death 6-interacting protein | (RefSeq) ALG-2 interacting protein X-like	[R]	General function prediction only	BRO1-like domain;; ALIX V-shaped domain binding to HIV	Vacuolar-sorting protein BRO1 OS=Arabidopsis thaliana OX=3702 GN=BRO1 PE=1 SV=1	S	Function unknown	PREDICTED: ALG-2 interacting protein X [Daucus carota subsp. sativus]
c79502.graph_c0	7	66	78	2	3	6	0.42	4.23	5.34	0.14	0.2	0.38	0.00252473	-2.75694	down	[QV]	Secondary metabolites biosynthesis, transport and catabolism ;; Defense mechanisms	Molecular Function: monooxygenase activity (GO:0004497);; Molecular Function: iron ion binding (GO:0005506);; Cellular Component: integral component of membrane (GO:0016021);; Molecular Function: oxidoreductase activity, acting on paired donors, with incorporation or reduction of molecular oxygen (GO:0016705);; Molecular Function: heme binding (GO:0020037);; Biological Process: oxidation-reductio…	K15398|1.08428e-120|gmx:100779986|K15398 fatty acid omega-hydroxylase [EC:1.14.-.-] | (RefSeq) cytochrome P450 86A8-like	[QI]	--	Cytochrome P450	Cytochrome P450 86A4 OS=Arabidopsis thaliana OX=3702 GN=CYP86A4 PE=1 SV=1	Q	Secondary metabolites biosynthesis, transport and catabolism	PREDICTED: cytochrome P450 86A8-like [Daucus carota subsp. sativus]
c86165.graph_c0	260	119	248	503	600	545	12.85	6.12	13.91	29.05	31.81	28.93	0.000503616	1.28048	up	--	--	--	--	--	--	--	--	S	Function unknown	PREDICTED: uncharacterized protein LOC108211946 [Daucus carota subsp. sativus]
c92298.graph_c1	298	158	354	498	944	948	6.31	3.8	8.73	12.39	22.65	21.68	0.0010109	1.40768	up	--	--	Biological Process: lipid metabolic process (GO:0006629);; Molecular Function: O-acyltransferase activity (GO:0008374);; Cellular Component: integral component of membrane (GO:0016021);; Molecular Function: lipase activity (GO:0016298);;	K00679|0|vvi:100243077|K00679 phospholipid:diacylglycerol acyltransferase [EC:2.3.1.158] | (RefSeq) putative phospholipid:diacylglycerol acyltransferase 2	[I]	Lipid transport and metabolism	Lecithin:cholesterol acyltransferase	Putative phospholipid:diacylglycerol acyltransferase 2 OS=Arabidopsis thaliana OX=3702 GN=PDAT2 PE=3 SV=1	S	Function unknown	PREDICTED: putative phospholipid:diacylglycerol acyltransferase 2 [Daucus carota subsp. sativus]
c82514.graph_c0	204	203	146	80	60	60	4.58	4.9	3.76	2.11	1.46	1.43	0.000510897	-1.47304	down	[E]	Amino acid transport and metabolism	Molecular Function: catalytic activity (GO:0003824);;	--	[H]	Coenzyme transport and metabolism	--	Molybdenum cofactor sulfurase OS=Solanum lycopersicum OX=4081 GN=FLACCA PE=2 SV=1	E	Amino acid transport and metabolism	PREDICTED: uncharacterized protein LOC108212187 [Daucus carota subsp. sativus]
c81568.graph_c0	279	378	267	94	52	65	6.02	8.78	6.6	2.38	1.22	1.49	1.63695e-06	-2.08236	down	[O]	Posttranslational modification, protein turnover, chaperones	Molecular Function: serine-type endopeptidase activity (GO:0004252);; Biological Process: proteolysis (GO:0006508);;	--	--	--	Subtilase family;; Peptidase inhibitor I9	Subtilisin-like protease SBT1.9 OS=Arabidopsis thaliana OX=3702 GN=SBT1.9 PE=2 SV=1	O	Posttranslational modification, protein turnover, chaperones	PREDICTED: uncharacterized protein LOC108223807 [Daucus carota subsp. sativus]
c56120.graph_c0	203	91	136	34	63	35	47.23	22.68	36.3	9.55	16.67	8.8	0.00070405	-1.67138	down	--	--	Cellular Component: cytoplasm (GO:0005737);; Biological Process: galactose metabolic process (GO:0006012);; Biological Process: carbohydrate biosynthetic process (GO:0016051);; Molecular Function: metal ion binding (GO:0046872);; Molecular Function: inositol 3-alpha-galactosyltransferase activity (GO:0047216);;	K18819|8.13232e-19|crb:CARUB_v10006472mg|K18819 inositol 3-alpha-galactosyltransferase [EC:2.4.1.123] | (RefSeq) hypothetical protein	[G]	Carbohydrate transport and metabolism	--	Galactinol synthase 5 OS=Arabidopsis thaliana OX=3702 GN=GOLS5 PE=2 SV=1	O	Posttranslational modification, protein turnover, chaperones	PREDICTED: galactinol synthase 1-like [Daucus carota subsp. sativus]
c86917.graph_c3	331	238	254	136	130	110	75.6	59.2	66.41	36.83	34.31	27.65	0.000258125	-1.17258	down	--	--	Molecular Function: transcription factor activity, sequence-specific DNA binding (GO:0003700);; Cellular Component: nucleus (GO:0005634);; Biological Process: regulation of transcription, DNA-templated (GO:0006355);; Molecular Function: transaminase activity (GO:0008483);; Molecular Function: sequence-specific DNA binding (GO:0043565);;	K09338|4.18036e-58|mdm:103401624|K09338 homeobox-leucine zipper protein | (RefSeq) HD21; homeobox-leucine zipper protein ATHB-6-like	[K]	Transcription	Homeobox domain;; Homeobox KN domain	Homeobox-leucine zipper protein ATHB-16 OS=Arabidopsis thaliana OX=3702 GN=ATHB-16 PE=2 SV=2	K	Transcription	DNA-binding protein, partial [Daucus carota]
c90339.graph_c1	95	126	167	434	371	332	3.01	4.55	5.7	17.41	13.74	12.92	0.000433672	1.40071	up	[R]	General function prediction only	Cellular Component: PcG protein complex (GO:0031519);;	K11430|2.42992e-60|cic:CICLE_v10024826mg|K11430 histone-lysine N-methyltransferase EZH2 [EC:2.1.1.43] | (RefSeq) hypothetical protein	[K]	Transcription	SET domain	Histone-lysine N-methyltransferase CLF OS=Arabidopsis thaliana OX=3702 GN=CLF PE=1 SV=2	S	Function unknown	PREDICTED: histone-lysine N-methyltransferase CLF isoform X1 [Eucalyptus grandis]
c86305.graph_c0	1677	1053	1022	462	115	283	56.27	38.04	39.34	18.2	4.18	10.08	0.00044087	-1.95566	down	--	--	--	--	--	--	--	Protein BIG GRAIN 1-like E OS=Arabidopsis thaliana OX=3702 GN=At1g69160 PE=2 SV=1	S	Function unknown	PREDICTED: protein BIG GRAIN 1-like E [Daucus carota subsp. sativus]
c90763.graph_c0	5360	4096	5956	1638	793	706	121.54	101.01	156.42	39.38	18.29	16.77	7.82387e-08	-2.21688	down	[C]	Energy production and conversion	Biological Process: nitric oxide biosynthetic process (GO:0006809);; Molecular Function: nitrate reductase (NADH) activity (GO:0009703);; Molecular Function: heme binding (GO:0020037);; Molecular Function: molybdenum ion binding (GO:0030151);; Biological Process: nitrate assimilation (GO:0042128);; Molecular Function: molybdopterin cofactor binding (GO:0043546);; Molecular Function: nitrate reduc…	K10534|0|tcc:TCM_035019|K10534 nitrate reductase (NAD(P)H) [EC:1.7.1.1 1.7.1.2 1.7.1.3] | (RefSeq) Nitrate reductase 2	[C]	Energy production and conversion	Oxidoreductase NAD-binding domain;; Oxidoreductase FAD-binding domain;; Mo-co oxidoreductase dimerisation domain;; Cytochrome b5-like Heme/Steroid binding domain;; Oxidoreductase molybdopterin binding domain;; Mo-co oxidoreductase dimerisation domain	Nitrate reductase [NADH] OS=Petunia hybrida OX=4102 GN=NIA PE=2 SV=1	CI	--	PREDICTED: nitrate reductase [NADH]-like [Daucus carota subsp. sativus]
c79309.graph_c0	37	33	25	0	0	5	3.57	3.68	3.46	0	0	1.2	0.00325754	-2.80678	down	--	--	--	K09422|4.52672e-49|sind:105169011|K09422 myb proto-oncogene protein, plant | (RefSeq) transcription factor MYB86-like	[K]	Transcription	--	Transcription factor MYB61 OS=Arabidopsis thaliana OX=3702 GN=MYB61 PE=2 SV=1	K	Transcription	PREDICTED: transcription factor MYB86-like [Daucus carota subsp. sativus]
c88314.graph_c0	1358	861	1327	2473	2906	3054	241.74	165.81	270.58	518.81	579.79	583	5.2435e-06	1.15487	up	--	--	--	--	[R]	General function prediction only	zinc-binding in reverse transcriptase	--	S	Function unknown	PREDICTED: uncharacterized protein LOC108203686 [Daucus carota subsp. sativus]
c71342.graph_c0	810	1054	737	255	280	267	105.9	145.58	108.75	40.89	41.92	38.53	4.46825e-09	-1.7506	down	--	--	Cellular Component: extracellular region (GO:0005576);; Cellular Component: plasma membrane (GO:0005886);; Cellular Component: plant-type cell wall (GO:0009505);; Molecular Function: peptidase inhibitor activity (GO:0030414);; Biological Process: killing of cells of other organism (GO:0031640);; Biological Process: defense response to fungus (GO:0050832);;	--	--	--	Gamma-thionin family	Defensin-like protein 2 OS=Arabidopsis thaliana OX=3702 GN=PDF2.2 PE=2 SV=1	S	Function unknown	PREDICTED: defensin-like protein 1 [Daucus carota subsp. sativus]
c81352.graph_c0	1597	1399	1626	678	169	443	107.49	100.9	125.24	53.87	12.42	31.85	0.00207879	-1.71777	down	--	--	Cellular Component: intracellular (GO:0005622);; Molecular Function: zinc ion binding (GO:0008270);;	--	[K]	Transcription	CCT motif	Zinc finger protein CONSTANS-LIKE 6 OS=Arabidopsis thaliana OX=3702 GN=COL6 PE=2 SV=2	K	Transcription	PREDICTED: zinc finger protein CONSTANS-LIKE 16-like [Daucus carota subsp. sativus]
c82589.graph_c0	138	111	92	48	43	46	7.43	6.5	5.7	3.02	2.36	2.63	0.00362721	-1.32141	down	--	--	--	--	[R]	General function prediction only	--	Retrovirus-related Pol polyprotein from transposon RE1 OS=Arabidopsis thaliana OX=3702 GN=RE1 PE=2 SV=1	L	Replication, recombination and repair	uncharacterized protein LOC110796898 [Spinacia oleracea]
c85372.graph_c0	3580	11959	5075	1085	241	994	234.05	639.72	315.6	74.83	13.73	61.5	0.0050812	-2.46701	down	[QV]	Secondary metabolites biosynthesis, transport and catabolism ;; Defense mechanisms	Molecular Function: monooxygenase activity (GO:0004497);; Molecular Function: iron ion binding (GO:0005506);; Cellular Component: integral component of membrane (GO:0016021);; Molecular Function: oxidoreductase activity, acting on paired donors, with incorporation or reduction of molecular oxygen (GO:0016705);; Molecular Function: heme binding (GO:0020037);; Biological Process: oxidation-reductio…	K07408|0|sot:102589304|K07408 cytochrome P450 family 1 subfamily A polypeptide 1 [EC:1.14.14.1] | (RefSeq) cytochrome P450 71A6-like	[Q]	Secondary metabolites biosynthesis, transport and catabolism	Cytochrome P450;; Cupin;; Cupin domain	Psoralen synthase OS=Ammi majus OX=48026 GN=CYP71AJ1 PE=1 SV=1	Q	Secondary metabolites biosynthesis, transport and catabolism	CYP71AJ6 [Thapsia villosa var. laciniata]
c77492.graph_c0	250	339	264	139	121	91	15.21	20.88	17.37	10.93	9.77	7.22	0.00122357	-1.32037	down	[R]	General function prediction only	--	K06962|4.31662e-158|vvi:100265963|K06962 uncharacterized protein | (RefSeq) uncharacterized protein YacP	--	--	YacP-like NYN domain	--	S	Function unknown	PREDICTED: uncharacterized protein YacP isoform X1 [Daucus carota subsp. sativus]
c80032.graph_c0	18	11	29	77	413	248	0.5	0.33	0.91	2.49	12.36	7.26	4.01324e-07	3.0896	up	--	--	--	--	--	--	Transcriptional repressor, ovate;; DNA-binding domain	Transcription repressor OFP4 OS=Arabidopsis thaliana OX=3702 GN=OFP4 PE=1 SV=1	S	Function unknown	PREDICTED: transcription repressor OFP1-like [Daucus carota subsp. sativus]
c82150.graph_c0	429	395	289	192	140	145	13.6	13.95	10.34	7.11	4.95	4.74	0.00130552	-1.24714	down	--	--	Cellular Component: integral component of membrane (GO:0016021);;	--	--	--	CemA family	Chloroplast envelope membrane protein OS=Rhodomonas salina OX=52970 GN=cemA PE=3 SV=1	P	Inorganic ion transport and metabolism	PREDICTED: chloroplast envelope membrane protein [Daucus carota subsp. sativus]
c90613.graph_c0	1360	628	635	412	490	316	73.69	36.07	39.52	27.46	27.92	20.54	0.00925914	-1.12458	down	[G]	Carbohydrate transport and metabolism	Molecular Function: pectate lyase activity (GO:0030570);; Biological Process: pectin catabolic process (GO:0045490);; Molecular Function: metal ion binding (GO:0046872);;	K01728|0|bna:106375788|K01728 pectate lyase [EC:4.2.2.2] | (RefSeq) probable pectate lyase 18	--	--	Pectate lyase	Probable pectate lyase 18 OS=Arabidopsis thaliana OX=3702 GN=At4g24780 PE=2 SV=2	G	Carbohydrate transport and metabolism	PREDICTED: probable pectate lyase 18 [Daucus carota subsp. sativus]
c82106.graph_c0	903	878	985	320	252	202	31.62	33.4	39.57	13.71	9.57	7.41	3.72637e-10	-1.86183	down	[GI]	Carbohydrate transport and metabolism ;; Lipid transport and metabolism	Molecular Function: hydrolase activity (GO:0016787);;	K01051|3.02532e-106|aip:107627793|K01051 pectinesterase [EC:3.1.1.11] | (RefSeq) pectinesterase 2-like	--	--	Pectinesterase	Pectinesterase 2 OS=Citrus sinensis OX=2711 GN=PECS-2.1 PE=2 SV=1	G	Carbohydrate transport and metabolism	PREDICTED: pectinesterase-like [Daucus carota subsp. sativus]
c82385.graph_c0	80	108	91	28	43	11	7.72	11.21	10.08	3.21	4.58	1.14	0.0086201	-1.69955	down	--	--	Biological Process: transport (GO:0006810);; Cellular Component: membrane (GO:0016020);; Cellular Component: cell part (GO:0044464);;	K14640|3.0254e-18|pmum:103321847|K14640 solute carrier family 20 (sodium-dependent phosphate transporter) | (RefSeq) inorganic phosphate transporter 2-1, chloroplastic	--	--	--	--	P	Inorganic ion transport and metabolism	PREDICTED: inorganic phosphate transporter 2-1, chloroplastic [Daucus carota subsp. sativus]
c85847.graph_c0	90	54	74	159	190	163	5.68	3.86	6.03	12.36	12.84	10.62	0.00334669	1.11344	up	[J]	Translation, ribosomal structure and biogenesis	Cellular Component: nuclear exosome (RNase complex) (GO:0000176);; Cellular Component: cytoplasmic exosome (RNase complex) (GO:0000177);; Cellular Component: nucleolus (GO:0005730);; Biological Process: rRNA catabolic process (GO:0016075);; Biological Process: rRNA 3'-end processing (GO:0031125);; Biological Process: nuclear-transcribed mRNA catabolic process, exonucleolytic, 3'-5' (GO:0034427);;…	K12590|1.06283e-140|pmum:103320210|K12590 exosome complex component RRP46 | (RefSeq) exosome complex exonuclease RRP46 homolog	[J]	Translation, ribosomal structure and biogenesis	3' exoribonuclease family, domain 1	Exosome complex exonuclease RRP46 homolog OS=Arabidopsis thaliana OX=3702 GN=RRP46 PE=2 SV=1	J	Translation, ribosomal structure and biogenesis	PREDICTED: exosome complex exonuclease RRP46 homolog [Daucus carota subsp. sativus]
c92702.graph_c1	1061	692	1461	1927	3218	3528	24.5	18.43	39.89	50.09	76.1	82.94	0.00100094	1.29508	up	[T]	Signal transduction mechanisms	Molecular Function: protein serine/threonine kinase activity (GO:0004674);; Molecular Function: ATP binding (GO:0005524);; Cellular Component: vacuole (GO:0005773);; Biological Process: protein phosphorylation (GO:0006468);; Biological Process: signal transduction (GO:0007165);; Cellular Component: plasmodesma (GO:0009506);;	K12761|0|pxb:103962180|K12761 carbon catabolite-derepressing protein kinase [EC:2.7.11.1] | (RefSeq) CBL-interacting serine/threonine-protein kinase 14-like	[T]	Signal transduction mechanisms	Weak chloroplast movement under blue light;; Protein kinase domain;; Protein tyrosine kinase;; NAF domain;; Kinase-like	CBL-interacting serine/threonine-protein kinase 11 OS=Arabidopsis thaliana OX=3702 GN=CIPK11 PE=1 SV=1	T	Signal transduction mechanisms	PREDICTED: WEB family protein At2g38370 [Daucus carota subsp. sativus]
c88368.graph_c0	5473	5590	3336	1345	614	1338	132.09	146.42	91.58	38.98	17.44	35.67	3.50519e-06	-2.05409	down	[T]	Signal transduction mechanisms	Molecular Function: calcium ion binding (GO:0005509);;	K13448|3.13098e-45|spen:107022660|K13448 calcium-binding protein CML | (RefSeq) putative calcium-binding protein CML19	[T]	Signal transduction mechanisms	EF-hand domain pair;; EF-hand domain;; EF hand;; EF-hand domain pair;; EF hand;; Caleosin related protein	Calcium-binding protein CML38 OS=Arabidopsis thaliana OX=3702 GN=CML38 PE=2 SV=1	DTZ	--	hypothetical protein DCAR_009849 [Daucus carota subsp. sativus]
c67513.graph_c0	24	28	27	4	1	2	2.98	3.74	3.85	0.59	0.14	0.27	0.00156532	-2.68468	down	--	--	--	K07897|1.83857e-06|pop:POPTR_0005s08730g|K07897 Ras-related protein Rab-7A | (RefSeq) POPTRDRAFT_862060; hypothetical protein	[R]	General function prediction only	--	Ras-related protein RABG2 OS=Arabidopsis thaliana OX=3702 GN=RABG2 PE=2 SV=2	--	--	hypothetical protein TSUD_288480 [Trifolium subterraneum]
c90576.graph_c1	222	544	336	74	131	70	11.27	30.42	19.73	4.6	7.67	4.09	6.20778e-05	-1.99803	down	--	--	--	--	[MW]	--	Fasciclin domain	Fasciclin-like arabinogalactan protein 17 OS=Arabidopsis thaliana OX=3702 GN=FLA17 PE=2 SV=1	M	Cell wall/membrane/envelope biogenesis	PREDICTED: fasciclin-like arabinogalactan protein 15 [Daucus carota subsp. sativus]
c81152.graph_c0	925	1237	840	142	52	201	80.85	115.63	80.99	15.05	5.1	19.03	1.13604e-07	-2.72823	down	--	--	Biological Process: response to auxin (GO:0009733);; Cellular Component: integral component of membrane (GO:0016021);;	K14488|2.65744e-58|vvi:100257133|K14488 SAUR family protein | (RefSeq) auxin-induced protein 15A-like	--	--	Auxin responsive protein	Auxin-responsive protein SAUR50 OS=Arabidopsis thaliana OX=3702 GN=SAUR50 PE=1 SV=1	S	Function unknown	PREDICTED: auxin-induced protein 15A [Daucus carota subsp. sativus]
c90364.graph_c0	39698	42131	29794	15640	8501	13475	2026.99	2314.88	1745.91	945.73	479.4	737.17	4.62329e-05	-1.56574	down	--	--	Cellular Component: chloroplast (GO:0009507);; Cellular Component: photosystem II (GO:0009523);; Biological Process: photosynthesis (GO:0015979);; Cellular Component: integral component of membrane (GO:0016021);;	K02721|6.63193e-35|sot:102581428|K02721 photosystem II PsbW protein | (RefSeq) photosystem II reaction center W protein, chloroplastic	--	--	Photosystem II reaction centre W protein (PsbW)	Photosystem II reaction center W protein, chloroplastic OS=Spinacia oleracea OX=3562 GN=psbW PE=1 SV=1	S	Function unknown	PREDICTED: photosystem II reaction center W protein, chloroplastic-like isoform X1 [Daucus carota subsp. sativus]
c74170.graph_c0	65	123	81	15	10	4	3.99	8.13	5.71	1.09	0.67	0.26	6.74082e-06	-2.86701	down	[R]	General function prediction only	--	--	[MW]	--	Fasciclin domain	Fasciclin-like arabinogalactan protein 17 OS=Arabidopsis thaliana OX=3702 GN=FLA17 PE=2 SV=1	M	Cell wall/membrane/envelope biogenesis	hypothetical protein DCAR_013456 [Daucus carota subsp. sativus]
c92662.graph_c0	209	310	284	91	106	99	4.84	9.77	9.49	2.26	2.48	2.31	6.28753e-05	-1.48643	down	[L]	Replication, recombination and repair	Molecular Function: protein serine/threonine kinase activity (GO:0004674);; Cellular Component: cytosol (GO:0005829);; Biological Process: protein phosphorylation (GO:0006468);; Biological Process: intracellular signal transduction (GO:0035556);;	--	--	--	bHLH-MYC and R2R3-MYB transcription factors N-terminal;; Methyladenine glycosylase	Protein RICE SALT SENSITIVE 3 OS=Oryza sativa subsp. japonica OX=39947 GN=RSS3 PE=1 SV=1	S	Function unknown	PREDICTED: uncharacterized protein LOC108214823 [Daucus carota subsp. sativus]
c87050.graph_c0	227	521	338	134	92	88	8.53	21.07	14.56	5.92	3.8	3.55	0.000530205	-1.76246	down	--	--	--	--	--	--	Cotton fibre expressed protein	--	S	Function unknown	PREDICTED: uncharacterized protein LOC108205362 [Daucus carota subsp. sativus]
c85387.graph_c0	1025	1475	877	521	748	410	37.94	58.78	37.24	22.69	30.19	16.15	0.00979825	-1.09058	down	[H]	Coenzyme transport and metabolism	Cellular Component: chloroplast envelope (GO:0009941);; Biological Process: plastoquinone biosynthetic process (GO:0010236);; Molecular Function: homogentisate farnesyltransferase activity (GO:0010355);; Molecular Function: homogentisate geranylgeranyltransferase activity (GO:0010356);; Molecular Function: homogentisate solanesyltransferase activity (GO:0010357);; Cellular Component: integral com…	K12501|0|gra:105799584|K12501 homogentisate solanesyltransferase [EC:2.5.1.117] | (RefSeq) homogentisate solanesyltransferase, chloroplastic	--	--	UbiA prenyltransferase family	Homogentisate solanesyltransferase, chloroplastic OS=Arabidopsis thaliana OX=3702 GN=HST PE=1 SV=1	H	Coenzyme transport and metabolism	PREDICTED: homogentisate solanesyltransferase, chloroplastic isoform X1 [Daucus carota subsp. sativus]
c80218.graph_c0	826	661	508	354	239	323	34.2	31.58	23.54	18.76	11.95	15.15	0.00390799	-1.14081	down	[F]	Nucleotide transport and metabolism	Molecular Function: adenine phosphoribosyltransferase activity (GO:0003999);; Cellular Component: cytoplasm (GO:0005737);; Biological Process: adenine salvage (GO:0006168);; Biological Process: nucleoside metabolic process (GO:0009116);;	K00759|6.5733e-66|tcc:TCM_027245|K00759 adenine phosphoribosyltransferase [EC:2.4.2.7] | (RefSeq) Adenine phosphoribosyl transferase 2 isoform 1	[F]	Nucleotide transport and metabolism	Phosphoribosyl transferase domain;; NUMOD3 motif (2 copies)	Adenine phosphoribosyltransferase 5 OS=Arabidopsis thaliana OX=3702 GN=APT5 PE=1 SV=1	F	Nucleotide transport and metabolism	PREDICTED: adenine phosphoribosyltransferase 5-like isoform X1 [Daucus carota subsp. sativus]
c75862.graph_c0	78	39	176	165	984	822	4.18	2.29	11.27	10.77	60.68	49.25	0.00102788	2.27136	up	--	--	--	--	--	--	--	--	S	Function unknown	PREDICTED: uncharacterized protein LOC108208055 [Daucus carota subsp. sativus]
c76433.graph_c0	2555	2872	1824	657	475	541	116.31	140.78	95.25	35.28	23.5	26.3	1.13873e-10	-2.12003	down	--	--	Molecular Function: calcium ion binding (GO:0005509);; Cellular Component: photosystem II oxygen evolving complex (GO:0009654);; Biological Process: photosynthesis (GO:0015979);; Cellular Component: extrinsic component of membrane (GO:0019898);;	K08901|1.45161e-82|sind:105156527|K08901 photosystem II oxygen-evolving enhancer protein 3 | (RefSeq) psbQ-like protein 1, chloroplastic	--	--	Oxygen evolving enhancer protein 3 (PsbQ)	Photosynthetic NDH subunit of lumenal location 2, chloroplastic OS=Arabidopsis thaliana OX=3702 GN=PNSL2 PE=1 SV=1	S	Function unknown	PREDICTED: photosynthetic NDH subunit of lumenal location 2, chloroplastic [Daucus carota subsp. sativus]
c83321.graph_c0	16	130	48	0	0	0	0.6	5.22	2.09	0	0	0	7.00062e-08	-4.60784	down	[J]	Translation, ribosomal structure and biogenesis	Molecular Function: organic cyclic compound binding (GO:0097159);; Molecular Function: heterocyclic compound binding (GO:1901363);;	--	[R]	General function prediction only	RNA recognition motif. (a.k.a. RRM, RBD, or RNP domain)	Probable RNA-binding protein ARP1 OS=Arabidopsis thaliana OX=3702 GN=ARP1 PE=2 SV=1	S	Function unknown	PREDICTED: RNA-binding protein 38-like [Daucus carota subsp. sativus]
c80228.graph_c0	2181	2392	1562	1028	947	906	97.34	115.5	79.8	53.55	46.06	42.51	0.000338206	-1.14962	down	--	--	Cellular Component: chloroplast (GO:0009507);; Cellular Component: photosystem II (GO:0009523);; Cellular Component: thylakoid membrane (GO:0042651);;	--	--	--	PsbP	PsbP domain-containing protein 3, chloroplastic OS=Arabidopsis thaliana OX=3702 GN=PPD3 PE=1 SV=2	S	Function unknown	PREDICTED: psbP domain-containing protein 3, chloroplastic [Daucus carota subsp. sativus]
c82573.graph_c0	44	76	40	6	11	10	1.67	3.2	1.77	0.3	0.48	0.45	0.000606713	-2.32454	down	--	--	--	K20464|7.97921e-174|sind:105161654|K20464 oxysterol-binding protein-related protein 5/8 | (RefSeq) oxysterol-binding protein-related protein 4C-like	[T]	Signal transduction mechanisms	Oxysterol-binding protein	Oxysterol-binding protein-related protein 4C OS=Arabidopsis thaliana OX=3702 GN=ORP4C PE=2 SV=1	S	Function unknown	PREDICTED: oxysterol-binding protein-related protein 4C isoform X1 [Daucus carota subsp. sativus]
c74974.graph_c0	684	884	594	216	85	160	42.69	59.24	42.45	15.89	5.69	10.67	4.61922e-06	-2.14025	down	--	--	--	--	--	--	--	--	--	--	hypothetical protein DCAR_008749 [Daucus carota subsp. sativus]
c81229.graph_c0	7642	5860	3736	2579	736	1703	447.21	372.33	250.73	178.59	45.89	105.67	0.00327144	-1.66215	down	--	--	--	--	--	--	Cotton fibre expressed protein;; Domain of unknown function (DUF4408)	--	S	Function unknown	PREDICTED: mediator of RNA polymerase II transcription subunit 15-like [Daucus carota subsp. sativus]
c88315.graph_c0	1533	1508	1297	2774	3243	3583	88.03	88.97	82.51	144.5	178.81	171.23	2.90246e-05	1.03668	up	--	--	Cellular Component: chloroplast envelope (GO:0009941);; Cellular Component: integral component of membrane (GO:0016021);;	--	--	--	Uncharacterized protein family, UPF0114	--	S	Function unknown	PREDICTED: uncharacterized protein LOC108200760 [Daucus carota subsp. sativus]
c81935.graph_c0	165	158	267	318	770	748	4.42	5.73	8.66	10.88	24.35	22.58	0.00205256	1.44364	up	[C]	Energy production and conversion	--	--	--	--	4Fe-4S single cluster domain of Ferredoxin I	--	S	Function unknown	PREDICTED: uncharacterized protein LOC108199330 isoform X1 [Daucus carota subsp. sativus]
c92136.graph_c0	3659	3407	3320	1674	1302	1402	64.8	65.63	64.92	46.42	37.13	39.95	7.76537e-07	-1.29364	down	[M]	Cell wall/membrane/envelope biogenesis	Molecular Function: nucleocytoplasmic transporter activity (GO:0005487);; Cellular Component: nucleolus (GO:0005730);; Biological Process: NLS-bearing protein import into nucleus (GO:0006607);; Biological Process: nuclear pore organization (GO:0006999);; Molecular Function: structural constituent of nuclear pore (GO:0017056);; Biological Process: protein localization to nuclear inner membrane (GO…	K14308|8.53141e-144|rcu:8286814|K14308 nuclear pore complex protein Nup54 | (RefSeq) nuclear pore complex protein NUP54	[YU]	--	Nucleoporin complex subunit 54;; Kelch motif;; Kelch motif;; Kelch motif;; Galactose oxidase, central domain;; Galactose oxidase, central domain;; Kelch motif;; F-box domain	Nuclear pore complex protein NUP54 OS=Arabidopsis thaliana OX=3702 GN=NUP54 PE=1 SV=1	U	Intracellular trafficking, secretion, and vesicular transport	PREDICTED: nuclear pore complex protein NUP54 [Daucus carota subsp. sativus]
c76088.graph_c1	386	590	443	254	193	185	24.1	35.98	29.34	16.44	11.08	11.12	0.00390165	-1.20848	down	[O]	Posttranslational modification, protein turnover, chaperones	Biological Process: response to abscisic acid (GO:0009737);; Cellular Component: integral component of membrane (GO:0016021);; Molecular Function: kinase activity (GO:0016301);; Biological Process: phosphorylation (GO:0016310);; Biological Process: farnesol metabolic process (GO:0016487);; Molecular Function: nucleotidyltransferase activity (GO:0016779);; Biological Process: carpel development (G…	K15892|1.68992e-101|sind:105177431|K15892 farnesol kinase [EC:2.7.1.-] | (RefSeq) probable phytol kinase 3, chloroplastic	[S]	Function unknown	--	Probable phytol kinase 3, chloroplastic OS=Glycine max OX=3847 PE=2 SV=1	I	Lipid transport and metabolism	farnesol kinase [Trachyspermum ammi]
c90026.graph_c1	35	33	50	85	326	196	0.59	0.6	1.19	2.23	7.02	4.21	0.000275945	2.029	up	[R]	General function prediction only	Cellular Component: cytosol (GO:0005829);; Molecular Function: nitronate monooxygenase activity (GO:0018580);; Biological Process: oxidation-reduction process (GO:0055114);;	--	--	--	Transferase family;; Nitronate monooxygenase;; FMN-dependent dehydrogenase;; IMP dehydrogenase / GMP reductase domain	Pelargonidin 3-O-(6-caffeoylglucoside) 5-O-(6-O-malonylglucoside) 4&apos;&apos;&apos;-malonyltransferase OS=Salvia splendens OX=180675 PE=1 SV=1	S	Function unknown	PREDICTED: pelargonidin 3-O-(6-caffeoylglucoside) 5-O-(6-O-malonylglucoside) 4&apos;&apos;&apos;-malonyltransferase-like [Daucus carota subsp. sativus]
c81793.graph_c0	1828	1572	1066	704	263	600	103.19	89.82	67.13	44.69	15.31	34.03	0.00572349	-1.44999	down	[TK]	Signal transduction mechanisms ;; Transcription	Biological Process: phosphorelay signal transduction system (GO:0000160);; Cellular Component: intracellular (GO:0005622);;	K14492|2.62092e-51|sind:105168196|K14492 two-component response regulator ARR-A family | (RefSeq) two-component response regulator ARR17	[K]	Transcription	Response regulator receiver domain	Two-component response regulator ARR4 OS=Arabidopsis thaliana OX=3702 GN=ARR4 PE=1 SV=1	T	Signal transduction mechanisms	PREDICTED: two-component response regulator ARR5-like [Daucus carota subsp. sativus]
c84235.graph_c0	833	517	860	1520	2297	2313	27.57	18.75	33.32	59.72	84.51	82.88	4.79741e-06	1.35508	up	[CHR]	Energy production and conversion ;; Coenzyme transport and metabolism ;; General function prediction only	--	K00058|1.51517e-36|gsl:Gasu_11390|K00058 D-3-phosphoglycerate dehydrogenase [EC:1.1.1.95] | (RefSeq) D-3-phosphoglycerate dehydrogenase	[K]	Transcription	D-isomer specific 2-hydroxyacid dehydrogenase, NAD binding domain;; D-isomer specific 2-hydroxyacid dehydrogenase, catalytic domain;; NAD binding domain of 6-phosphogluconate dehydrogenase	C-terminal binding protein AN OS=Arabidopsis thaliana OX=3702 GN=AN PE=1 SV=1	E	Amino acid transport and metabolism	c-terminal binding protein [Chrysochromulina sp. CCMP291]
c91281.graph_c0	182	259	169	60	87	78	6.57	7.89	6.45	2.21	2.41	2.04	0.000478317	-1.48039	down	--	--	--	--	--	--	Protein of unknown function (DUF668);; Domain of unknown function (DUF3475)	--	S	Function unknown	PREDICTED: uncharacterized protein LOC108200529 [Daucus carota subsp. sativus]
c91309.graph_c0	45	13	21	187	1054	294	2.27	0.34	0.62	6.1	32.23	8.11	4.00294e-09	3.59087	up	[P]	Inorganic ion transport and metabolism	Cellular Component: integral component of plasma membrane (GO:0005887);; Molecular Function: secondary active sulfate transmembrane transporter activity (GO:0008271);; Biological Process: sulfate transmembrane transport (GO:1902358);;	K17471|0|vvi:100267000|K17471 sulfate transporter 3 | (RefSeq) probable sulfate transporter 3.4	[P]	Inorganic ion transport and metabolism	Sulfate permease family;; STAS domain	Probable sulfate transporter 3.4 OS=Arabidopsis thaliana OX=3702 GN=SULTR3;4 PE=2 SV=1	P	Inorganic ion transport and metabolism	PREDICTED: probable sulfate transporter 3.4 isoform X1 [Daucus carota subsp. sativus]
c84165.graph_c0	834	876	497	274	177	287	22.16	24.75	15.72	8.21	5.39	8.21	0.000249969	-1.56974	down	--	--	Cellular Component: Golgi apparatus (GO:0005794);; Cellular Component: integral component of membrane (GO:0016021);; Molecular Function: O-acetyltransferase activity (GO:0016413);; Biological Process: cell wall organization or biogenesis (GO:0071554);;	--	--	--	GDSL/SGNH-like Acyl-Esterase family found in Pmr5 and Cas1p;; PMR5 N terminal Domain;; GDSL/SGNH-like Acyl-Esterase family found in Pmr5 and Cas1p	Protein trichome birefringence-like 10 OS=Arabidopsis thaliana OX=3702 GN=TBL10 PE=2 SV=1	S	Function unknown	PREDICTED: protein trichome birefringence-like 10 [Daucus carota subsp. sativus]
c44274.graph_c0	161	211	134	54	49	26	25.83	36.37	24.69	10.38	8.98	4.49	8.13027e-05	-1.93123	down	--	--	--	--	--	--	--	--	--	--	PREDICTED: protein HHL1, chloroplastic-like [Daucus carota subsp. sativus]
c80522.graph_c0	85	149	69	22	17	29	6.19	11.72	5.77	1.9	1.36	2.26	0.000902046	-2.02256	down	--	--	--	--	--	--	--	Non-specific lipid-transfer protein 2 OS=Oryza sativa subsp. indica OX=39946 GN=LTP-2 PE=3 SV=2	U	Intracellular trafficking, secretion, and vesicular transport	hypothetical protein DCAR_010703 [Daucus carota subsp. sativus]
c71974.graph_c1	84	74	103	30	45	27	8.04	7.61	11.5	3.4	4.78	2.85	0.00630394	-1.36712	down	--	--	Molecular Function: catalytic activity (GO:0003824);; Molecular Function: calcium ion binding (GO:0005509);; Cellular Component: plasma membrane (GO:0005886);; Cellular Component: plant-type vacuole membrane (GO:0009705);; Cellular Component: integral component of membrane (GO:0016021);; Biological Process: hyperosmotic salinity response (GO:0042538);; Biological Process: regulation of potassium …	K06268|1.34945e-118|vvi:100259377|K06268 serine/threonine-protein phosphatase 2B regulatory subunit | (RefSeq) CBL06; calcineurin B-like protein 06	[T]	Signal transduction mechanisms	EF hand;; EF-hand domain;; EF-hand domain pair;; EF hand;; EF-hand domain pair	Calcineurin B-like protein 10 OS=Arabidopsis thaliana OX=3702 GN=CBL10 PE=1 SV=1	DTZ	--	PREDICTED: calcineurin B-like protein 10 isoform X1 [Daucus carota subsp. sativus]
c93041.graph_c0	67	1007	426	42	17	38	0.99	15.57	7.01	0.69	0.26	0.57	1.19615e-05	-3.26289	down	--	--	--	--	--	--	N-terminal C2 in EEIG1 and EHBP1 proteins	--	S	Function unknown	PREDICTED: paramyosin-like [Daucus carota subsp. sativus]
c84641.graph_c0	179	141	251	303	626	641	7.31	5.27	10.83	12.87	24.56	23.34	0.00346181	1.29619	up	--	--	--	--	--	--	--	--	S	Function unknown	PREDICTED: uncharacterized protein LOC108222463 [Daucus carota subsp. sativus]
c91313.graph_c0	1600	1752	1284	758	608	706	174.99	206.15	160.16	98.04	73.42	82.45	0.000141423	-1.21067	down	--	--	Biological Process: sulfate assimilation (GO:0000103);; Biological Process: protein folding (GO:0006457);; Biological Process: glycerol ether metabolic process (GO:0006662);; Cellular Component: chloroplast (GO:0009507);; Molecular Function: protein disulfide oxidoreductase activity (GO:0015035);; Molecular Function: oxidoreductase activity, acting on a sulfur group of donors, disulfide as accept…	--	[O]	Posttranslational modification, protein turnover, chaperones	Thioredoxin	Thioredoxin-like 2, chloroplastic OS=Oryza sativa subsp. japonica OX=39947 GN=Os05g0200100 PE=2 SV=1	O	Posttranslational modification, protein turnover, chaperones	hypothetical protein DCAR_011983 [Daucus carota subsp. sativus]
c84101.graph_c0	297	706	351	142	105	108	10.62	27.49	14.54	6.94	4.82	4.55	0.000168817	-1.89721	down	[D]	Cell cycle control, cell division, chromosome partitioning	Molecular Function: GTPase activity (GO:0003924);; Molecular Function: GTP binding (GO:0005525);; Cellular Component: microtubule (GO:0005874);; Biological Process: microtubule-based process (GO:0007017);; Cellular Component: chloroplast stroma (GO:0009570);; Biological Process: response to blue light (GO:0009637);; Biological Process: chloroplast relocation (GO:0009902);; Biological Process: chl…	K03531|1.23017e-166|sot:102577799|K03531 cell division protein FtsZ | (RefSeq) FTSZ1; plastid-dividing ring protein	--	--	FtsZ family, C-terminal domain;; Tubulin/FtsZ family, GTPase domain	Cell division protein FtsZ homolog 1, chloroplastic OS=Arabidopsis thaliana OX=3702 GN=FTSZ1 PE=1 SV=2	D	Cell cycle control, cell division, chromosome partitioning	PREDICTED: cell division protein FtsZ homolog 1, chloroplastic [Daucus carota subsp. sativus]
c81762.graph_c0	51	41	56	84	181	143	2.97	2.56	3.81	5.77	11.58	8.98	0.00949827	1.27954	up	--	--	--	K15414|1.28764e-83|nnu:104597094|K15414 complement component 1 Q subcomponent-binding protein, mitochondrial | (RefSeq) uncharacterized protein At2g39795, mitochondrial-like	[C]	Energy production and conversion	Mitochondrial glycoprotein	Uncharacterized protein At2g39795, mitochondrial OS=Arabidopsis thaliana OX=3702 GN=At2g39795 PE=1 SV=1	S	Function unknown	PREDICTED: uncharacterized protein At2g39795, mitochondrial [Daucus carota subsp. sativus]
c90948.graph_c0	2546	2406	2449	1525	1112	1167	60.95	62.4	67.34	43.22	28.05	29.61	0.000884323	-1.00835	down	--	--	--	--	[R]	General function prediction only	Zinc finger, C2H2 type;; Zinc-finger double-stranded RNA-binding	Protein indeterminate-domain 5, chloroplastic OS=Arabidopsis thaliana OX=3702 GN=IDD5 PE=1 SV=1	S	Function unknown	PREDICTED: protein indeterminate-domain 4, chloroplastic-like [Daucus carota subsp. sativus]
c76236.graph_c0	212	176	291	402	679	461	14.45	12.75	22.36	31.26	50.05	32.44	0.00381637	1.04672	up	[C]	Energy production and conversion	Molecular Function: NADH dehydrogenase activity (GO:0003954);; Cellular Component: peroxisome (GO:0005777);; Cellular Component: intrinsic component of mitochondrial inner membrane (GO:0031304);; Biological Process: oxidation-reduction process (GO:0055114);; Biological Process: cellular response to light stimulus (GO:0071482);;	K17871|2.78334e-75|jcu:105630223|K17871 NADH:ubiquinone reductase (non-electrogenic) [EC:1.6.5.9] | (RefSeq) internal alternative NAD(P)H-ubiquinone oxidoreductase A1, mitochondrial-like	[C]	Energy production and conversion	Pyridine nucleotide-disulphide oxidoreductase	Internal alternative NAD(P)H-ubiquinone oxidoreductase A1, mitochondrial OS=Arabidopsis thaliana OX=3702 GN=NDA1 PE=2 SV=1	C	Energy production and conversion	PREDICTED: internal alternative NAD(P)H-ubiquinone oxidoreductase A2, mitochondrial-like [Daucus carota subsp. sativus]
c73035.graph_c0	1022	1054	782	457	493	395	43.3	48.17	37.83	22.84	23.08	18.06	4.9091e-05	-1.15682	down	[R]	General function prediction only	Cellular Component: integral component of membrane (GO:0016021);;	--	--	--	Tetratricopeptide repeat;; Tetratricopeptide repeat;; Tetratricopeptide repeat;; Tetratricopeptide repeat;; Tetratricopeptide repeat	--	S	Function unknown	PREDICTED: uncharacterized protein LOC108223480 isoform X3 [Daucus carota subsp. sativus]
c86245.graph_c0	581	362	617	983	1155	1252	32.27	21.22	37.07	56.19	62.17	60.5	0.000829865	1.02263	up	--	--	Cellular Component: membrane (GO:0016020);; Molecular Function: metal ion binding (GO:0046872);;	K10666|1.04834e-78|jcu:105639602|K10666 E3 ubiquitin-protein ligase RNF5 [EC:2.3.2.27] | (RefSeq) E3 ubiquitin-protein ligase RNF185-like	[O]	Posttranslational modification, protein turnover, chaperones	Zinc finger, C3HC4 type (RING finger);; Zinc finger, C3HC4 type (RING finger);; Ring finger domain;; Zinc finger, C3HC4 type (RING finger);; RING-type zinc-finger	E3 ubiquitin-protein ligase RMA3 OS=Arabidopsis thaliana OX=3702 GN=RMA3 PE=1 SV=1	O	Posttranslational modification, protein turnover, chaperones	PREDICTED: E3 ubiquitin-protein ligase RNF185-like [Daucus carota subsp. sativus]
c90604.graph_c2	433	293	514	168	188	140	13.78	11.51	17.22	6.54	7.48	7.3	3.44414e-05	-1.35778	down	--	--	Cellular Component: integral component of membrane (GO:0016021);; Molecular Function: transferase activity (GO:0016740);;	--	[R]	General function prediction only	10 TM Acyl Transferase domain found in Cas1p	Protein REDUCED WALL ACETYLATION 3 OS=Arabidopsis thaliana OX=3702 GN=RWA3 PE=1 SV=1	S	Function unknown	PREDICTED: protein REDUCED WALL ACETYLATION 3-like [Daucus carota subsp. sativus]
c89065.graph_c1	234	138	629	966	1808	1440	27.93	17.35	88.01	135.35	237.33	181.17	0.00149016	1.81024	up	--	--	--	--	--	--	--	--	S	Function unknown	hypothetical protein DCAR_022555 [Daucus carota subsp. sativus]
c80078.graph_c0	267	272	225	119	150	112	11.86	12.97	11.47	5.79	7.18	5.23	0.00120593	-1.07371	down	[I]	Lipid transport and metabolism	Molecular Function: ATP binding (GO:0005524);; Cellular Component: chloroplast (GO:0009507);; Cellular Component: chromoplast (GO:0009509);; Biological Process: terpenoid biosynthetic process (GO:0016114);; Biological Process: phosphorylation (GO:0016310);; Biological Process: isopentenyl diphosphate biosynthetic process, methylerythritol 4-phosphate pathway (GO:0019288);; Molecular Function: 4-(…	K00919|0|sot:102601451|K00919 4-diphosphocytidyl-2-C-methyl-D-erythritol kinase [EC:2.7.1.148] | (RefSeq) 4-diphosphocytidyl-2-C-methyl-D-erythritol kinase, chloroplastic/chromoplastic	--	--	GHMP kinases C terminal	4-diphosphocytidyl-2-C-methyl-D-erythritol kinase, chloroplastic/chromoplastic (Fragment) OS=Solanum lycopersicum OX=4081 GN=ISPE PE=1 SV=1	I	Lipid transport and metabolism	4-diphosphocytidyl-2-C-methyl-Derythritol kinase, partial [Trachyspermum ammi]
c90621.graph_c0	2638	2835	1851	1082	1114	1141	68.47	81.35	54.06	33.7	30.12	32.52	8.36532e-05	-1.1964	down	[C]	Energy production and conversion	Molecular Function: binding (GO:0005488);;	--	--	--	2Fe-2S iron-sulfur cluster binding domain	Polyadenylate-binding protein-interacting protein 5 OS=Arabidopsis thaliana OX=3702 GN=CID5 PE=2 SV=1	C	Energy production and conversion	PREDICTED: polyadenylate-binding protein-interacting protein 5-like [Daucus carota subsp. sativus]
c79078.graph_c0	99	226	132	32	3	11	5.63	13.65	8.37	2.24	0.2	0.7	0.00032499	-2.73282	down	--	--	--	--	--	--	--	Transcription factor IBH1-like 1 OS=Arabidopsis thaliana OX=3702 GN=IBL1 PE=1 SV=1	S	Function unknown	PREDICTED: uncharacterized protein LOC108221000 [Daucus carota subsp. sativus]
c91761.graph_c0	672	948	686	350	286	312	18.19	22.53	21.5	11.08	8.1	9.39	0.000193064	-1.3292	down	[K]	Transcription	Molecular Function: protein kinase activity (GO:0004672);; Molecular Function: ATP binding (GO:0005524);; Cellular Component: plasma membrane (GO:0005886);; Biological Process: protein phosphorylation (GO:0006468);; Biological Process: regulation of meristem growth (GO:0010075);; Cellular Component: integral component of membrane (GO:0016021);; Molecular Function: receptor serine/threonine kinase…	--	--	--	Protein kinase domain;; Protein tyrosine kinase;; Leucine Rich repeats (2 copies);; Leucine rich repeat;; Leucine Rich Repeat;; Leucine rich repeat N-terminal domain	Leucine-rich repeat receptor-like serine/threonine-protein kinase BAM1 OS=Arabidopsis thaliana OX=3702 GN=BAM1 PE=1 SV=1	S	Function unknown	PREDICTED: leucine-rich repeat receptor-like serine/threonine-protein kinase BAM1 [Daucus carota subsp. sativus]
c82215.graph_c0	334	201	204	43	52	33	24.91	16.18	17.45	3.79	4.22	2.63	1.33769e-11	-2.49035	down	--	--	--	--	--	--	Fantastic Four meristem regulator	Protein FANTASTIC FOUR 3 OS=Arabidopsis thaliana OX=3702 GN=FAF3 PE=2 SV=1	S	Function unknown	PREDICTED: protein FANTASTIC FOUR 4 [Daucus carota subsp. sativus]
c91994.graph_c0	441	289	378	161	214	155	8.42	5.91	8.12	3.6	4.41	3.13	0.000115504	-1.12224	down	--	;;	Molecular Function: protein serine/threonine kinase activity (GO:0004674);; Molecular Function: ATP binding (GO:0005524);; Biological Process: protein phosphorylation (GO:0006468);;	--	[T]	Signal transduction mechanisms	Ethylene-responsive protein kinase Le-CTR1;; Protein tyrosine kinase;; Protein kinase domain	Serine/threonine-protein kinase CTR1 OS=Arabidopsis thaliana OX=3702 GN=CTR1 PE=1 SV=1	T	Signal transduction mechanisms	PREDICTED: serine/threonine-protein kinase CTR1 isoform X1 [Daucus carota subsp. sativus]
c85223.graph_c0	519	363	556	1207	1933	1912	24.89	19.61	33.17	59.38	102.59	87.51	2.19356e-09	1.68195	up	--	--	Molecular Function: ATP binding (GO:0005524);; Cellular Component: chloroplast stroma (GO:0009570);; Cellular Component: integral component of membrane (GO:0016021);;	--	--	--	--	Protein Ycf2 OS=Daucus carota OX=4039 GN=ycf2-A PE=3 SV=1	S	Function unknown	PREDICTED: uncharacterized protein LOC108220908 [Daucus carota subsp. sativus]
c85048.graph_c0	1458	1236	2235	3908	9020	7080	62.22	57.83	109.82	182.02	404.2	296.93	6.27452e-07	1.83282	up	[C]	Energy production and conversion	--	--	[O]	Posttranslational modification, protein turnover, chaperones	DnaJ domain;; 4Fe-4S single cluster domain of Ferredoxin I;; 4Fe-4S single cluster domain	Chaperone protein dnaJ C76, chloroplastic OS=Arabidopsis thaliana OX=3702 GN=DJC76 PE=2 SV=1	C	Energy production and conversion	PREDICTED: uncharacterized protein LOC108196766 [Daucus carota subsp. sativus]
c83922.graph_c0	1103	628	1128	2181	1921	2006	71.02	43.41	83.37	166.13	135.62	137.78	0.00219472	1.00833	up	--	--	--	--	[S]	Function unknown	TMEM214, C-terminal, caspase 4 activator	--	S	Function unknown	hypothetical protein DCAR_007312 [Daucus carota subsp. sativus]
c82755.graph_c0	598	269	396	136	21	81	23.24	11.25	17.64	6.22	0.89	3.38	0.00191023	-2.09699	down	[GER]	Carbohydrate transport and metabolism ;; Amino acid transport and metabolism ;; General function prediction only	Cellular Component: plasma membrane (GO:0005886);; Cellular Component: integral component of membrane (GO:0016021);; Molecular Function: transmembrane transporter activity (GO:0022857);; Biological Process: transmembrane transport (GO:0055085);;	--	--	--	EamA-like transporter family	WAT1-related protein At5g07050 OS=Arabidopsis thaliana OX=3702 GN=At5g07050 PE=2 SV=1	S	Function unknown	PREDICTED: WAT1-related protein At5g07050-like [Daucus carota subsp. sativus]
c86414.graph_c0	163	138	145	52	69	39	9.92	8.94	9.93	3.73	4.48	2.55	0.000109562	-1.50932	down	[P]	Inorganic ion transport and metabolism	Molecular Function: cation transmembrane transporter activity (GO:0008324);; Cellular Component: integral component of membrane (GO:0016021);; Biological Process: cation transmembrane transport (GO:0098655);;	K14696|2.62925e-107|sind:105157912|K14696 solute carrier family 30 (zinc transporter), member 9 | (RefSeq) metal tolerance protein C4	[R]	General function prediction only	Cation efflux family	Metal tolerance protein C4 OS=Arabidopsis thaliana OX=3702 GN=MTPC4 PE=2 SV=1	P	Inorganic ion transport and metabolism	PREDICTED: metal tolerance protein C4 [Daucus carota subsp. sativus]
c68459.graph_c0	3	6	14	41	312	91	0.24	0.53	1.31	3.96	27.99	7.92	1.74713e-05	3.23813	up	--	--	--	--	--	--	Plant protein 1589 of unknown function (A_thal_3526)	--	S	Function unknown	PREDICTED: uncharacterized protein LOC108213728 [Daucus carota subsp. sativus]
c88047.graph_c0	5	1	17	30	176	50	0.16	0.04	0.67	1.18	8.61	1.75	0.00648319	2.47243	up	[E]	Amino acid transport and metabolism	Molecular Function: proline dehydrogenase activity (GO:0004657);; Biological Process: proline catabolic process (GO:0006562);; Biological Process: oxidation-reduction process (GO:0055114);;	K00318|0|tcc:TCM_019628|K00318 proline dehydrogenase [EC:1.5.-.-] | (RefSeq) Methylenetetrahydrofolate reductase family protein isoform 1	[E]	Amino acid transport and metabolism	Proline dehydrogenase	Proline dehydrogenase 2, mitochondrial OS=Arabidopsis thaliana OX=3702 GN=POX2 PE=2 SV=1	E	Amino acid transport and metabolism	PREDICTED: proline dehydrogenase 2, mitochondrial-like [Daucus carota subsp. sativus]
c77049.graph_c0	1	1	4	24	36	17	0.05	0.07	0.24	1.68	2.22	1	0.00465001	2.57386	up	--	--	--	--	--	--	Protein of unknown function (DUF1639)	--	--	--	hypothetical protein DCAR_025715 [Daucus carota subsp. sativus]
c76355.graph_c0	3	6	16	40	86	54	0.14	0.31	0.84	2.08	4.07	2.58	0.00334669	2.25732	up	--	--	Molecular Function: DNA binding (GO:0003677);; Molecular Function: transcription factor activity, sequence-specific DNA binding (GO:0003700);; Cellular Component: nucleus (GO:0005634);; Biological Process: regulation of transcription, DNA-templated (GO:0006355);; Biological Process: multicellular organism development (GO:0007275);;	K09284|5.58748e-49|nnu:104599345|K09284 AP2-like factor, euAP2 lineage | (RefSeq) ethylene-responsive transcription factor RAP2-7-like	--	--	--	Floral homeotic protein APETALA 2 OS=Arabidopsis thaliana OX=3702 GN=AP2 PE=1 SV=1	K	Transcription	PREDICTED: floral homeotic protein APETALA 2-like isoform X1 [Daucus carota subsp. sativus]
c72141.graph_c0	18	3	93	678	1217	1338	1.08	0.3	6.62	50.11	82.43	88.59	0.0023573	2.95767	up	--	--	Cellular Component: extracellular region (GO:0005576);; Cellular Component: cell wall (GO:0005618);; Cellular Component: cytosol (GO:0005829);;	--	--	--	Late embryogenesis abundant protein	Embryonic protein DC-8 OS=Daucus carota OX=4039 PE=3 SV=1	S	Function unknown	RecName: Full=Embryonic protein DC-8
c78912.graph_c0	65	78	73	28	29	16	3.02	3.89	3.88	1.53	1.47	0.79	0.00702461	-1.53395	down	--	--	--	--	--	--	--	--	S	Function unknown	PREDICTED: uncharacterized protein LOC108209718 [Daucus carota subsp. sativus]
c84132.graph_c0	67	61	52	171	268	209	2.79	2.74	2.49	8.4	12.2	9.28	1.14059e-06	1.68209	up	--	--	Molecular Function: nutrient reservoir activity (GO:0045735);;	--	--	--	Cupin	Glutelin type-D 1 OS=Oryza sativa subsp. japonica OX=39947 GN=GLUD1 PE=2 SV=1	S	Function unknown	PREDICTED: 11S globulin subunit beta-like [Daucus carota subsp. sativus]
c78231.graph_c0	168	178	140	78	65	56	5.9	6.57	5.8	4.71	4.54	3.19	0.00183622	-1.31319	down	--	--	Biological Process: chiasma assembly (GO:0051026);;	K06695|1.41546e-19|mdm:103423757|K06695 26S proteasome regulatory subunit, ATPase 3, interacting protein | (RefSeq) homologous-pairing protein 2 homolog	[T]	Signal transduction mechanisms	Hsp70 protein;; Retrotransposon gag protein	Homologous-pairing protein 2 homolog OS=Arabidopsis thaliana OX=3702 GN=HOP2 PE=1 SV=1	S	Function unknown	hypothetical protein DCAR_023669 [Daucus carota subsp. sativus]
c91962.graph_c0	485	372	409	855	922	965	32.87	27.55	32.54	71.71	72.47	75.57	8.33725e-06	1.02066	up	--	--	Cellular Component: nucleus (GO:0005634);; Molecular Function: protein heterodimerization activity (GO:0046982);;	K08066|1.06816e-78|nnu:104612503|K08066 nuclear transcription factor Y, gamma | (RefSeq) nuclear transcription factor Y subunit C-9	[K]	Transcription	Histone-like transcription factor (CBF/NF-Y) and archaeal histone;; Core histone H2A/H2B/H3/H4	Nuclear transcription factor Y subunit C-9 OS=Arabidopsis thaliana OX=3702 GN=NFYC9 PE=1 SV=1	K	Transcription	PREDICTED: nuclear transcription factor Y subunit C-9-like [Daucus carota subsp. sativus]
c81443.graph_c0	3648	4684	2991	1948	1317	1459	98.5	135.85	92.62	61.63	38.7	41.86	0.000704808	-1.29459	down	[M]	Cell wall/membrane/envelope biogenesis	Cellular Component: chloroplast thylakoid membrane (GO:0009535);; Biological Process: photosynthetic electron transport in photosystem I (GO:0009773);; Cellular Component: NAD(P)H dehydrogenase complex (plastoquinone) (GO:0010598);; Molecular Function: transferase activity, transferring glycosyl groups (GO:0016757);;	--	--	--	--	Photosynthetic NDH subunit of subcomplex B 1, chloroplastic OS=Arabidopsis thaliana OX=3702 GN=PNSB1 PE=2 SV=1	M	Cell wall/membrane/envelope biogenesis	PREDICTED: photosynthetic NDH subunit of subcomplex B 1, chloroplastic [Daucus carota subsp. sativus]
c82453.graph_c0	149	155	134	76	62	54	3.58	4.15	3.8	2.15	1.45	1.44	0.00479558	-1.21728	down	--	--	--	--	--	--	--	--	S	Function unknown	hypothetical protein DCAR_013420 [Daucus carota subsp. sativus]
c66281.graph_c0	64	32	48	11	18	8	11.22	6.03	9.67	2.32	3.55	1.51	0.00874362	-1.80125	down	[V]	Defense mechanisms	Molecular Function: ATP binding (GO:0005524);; Cellular Component: integral component of membrane (GO:0016021);; Molecular Function: ATPase activity, coupled to transmembrane movement of substances (GO:0042626);; Biological Process: transmembrane transport (GO:0055085);;	K05658|6.68967e-40|sind:105177189|K05658 ATP-binding cassette, subfamily B (MDR/TAP), member 1 [EC:3.6.3.44] | (RefSeq) ABC transporter B family member 15-like	[Q]	Secondary metabolites biosynthesis, transport and catabolism	--	ABC transporter B family member 16 OS=Arabidopsis thaliana OX=3702 GN=ABCB16 PE=2 SV=1	V	Defense mechanisms	PREDICTED: ABC transporter B family member 15-like [Daucus carota subsp. sativus]
c75565.graph_c0	79	53	133	245	1144	769	1.95	1.06	4.7	7.53	31.64	22.62	1.47855e-06	2.6247	up	--	--	Molecular Function: dihydrokaempferol 4-reductase activity (GO:0045552);; Molecular Function: coenzyme binding (GO:0050662);; Biological Process: oxidation-reduction process (GO:0055114);;	--	[V]	Defense mechanisms	--	Dihydroflavonol 4-reductase OS=Arabidopsis thaliana OX=3702 GN=DFRA PE=1 SV=2	M	Cell wall/membrane/envelope biogenesis	hypothetical protein DCAR_008682 [Daucus carota subsp. sativus]
c90580.graph_c0	735	736	607	377	191	240	14.55	16.34	13.79	10.91	6.06	7.2	0.00167871	-1.35684	down	--	--	--	--	--	--	Senescence regulator	--	S	Function unknown	hypothetical protein DCAR_010580 [Daucus carota subsp. sativus]
c87605.graph_c0	110	90	108	38	40	27	16.09	13.96	18.03	6.83	7.15	4.67	0.000404009	-1.55248	down	--	--	--	--	--	--	Vacuolar protein sorting-associated protein 62	--	S	Function unknown	PREDICTED: uncharacterized protein LOC108192557 [Daucus carota subsp. sativus]
c83935.graph_c0	84	45	126	13	24	19	4.51	2.56	7.35	0.83	1.28	0.95	0.000796485	-2.03476	down	--	--	Molecular Function: kinase activity (GO:0016301);;	--	[T]	Signal transduction mechanisms	Ethylene-responsive protein kinase Le-CTR1	Probable serine/threonine-protein kinase SIS8 OS=Arabidopsis thaliana OX=3702 GN=SIS8 PE=1 SV=1	T	Signal transduction mechanisms	PREDICTED: serine/threonine-protein kinase EDR1-like isoform X3 [Daucus carota subsp. sativus]
c81272.graph_c0	24	21	43	390	2301	980	0.69	1.41	1.42	15.56	74.17	30.37	5.41934e-19	4.66599	up	--	--	--	--	--	--	--	Probable membrane-associated kinase regulator 4 OS=Arabidopsis thaliana OX=3702 GN=MAKR4 PE=3 SV=1	S	Function unknown	PREDICTED: probable membrane-associated kinase regulator 4 [Daucus carota subsp. sativus]
c84982.graph_c0	156	116	177	62	48	49	4.77	3.82	6.2	2.23	1.6	1.59	0.00036733	-1.49065	down	--	--	Cellular Component: integral component of membrane (GO:0016021);;	--	--	--	Protein BYPASS1-related	--	S	Function unknown	PREDICTED: UPF0496 protein 4 [Daucus carota subsp. sativus]
c77852.graph_c0	154	337	176	27	13	28	5.53	13.18	7.22	1.17	0.51	1.06	2.42715e-08	-3.04441	down	--	--	Molecular Function: aspartic-type endopeptidase activity (GO:0004190);; Biological Process: proteolysis (GO:0006508);; Cellular Component: plant-type cell wall (GO:0009505);; Cellular Component: chloroplast (GO:0009507);; Cellular Component: apoplast (GO:0048046);;	--	[O]	Posttranslational modification, protein turnover, chaperones	Xylanase inhibitor N-terminal;; Xylanase inhibitor C-terminal;; Eukaryotic aspartyl protease	Aspartyl protease AED3 OS=Arabidopsis thaliana OX=3702 GN=AED3 PE=1 SV=1	O	Posttranslational modification, protein turnover, chaperones	PREDICTED: aspartyl protease AED3-like [Daucus carota subsp. sativus]
c89129.graph_c0	207	115	189	368	794	514	7.29	5.3	8.3	15.43	26.29	19.78	3.65572e-05	1.54916	up	[O]	Posttranslational modification, protein turnover, chaperones	Molecular Function: ATP binding (GO:0005524);; Cellular Component: integral component of membrane (GO:0016021);; Biological Process: cell division (GO:0051301);;	--	[O]	Posttranslational modification, protein turnover, chaperones	ATPase family associated with various cellular activities (AAA);; AAA domain (dynein-related subfamily);; ATPase family associated with various cellular activities (AAA);; AAA ATPase domain;; AAA domain;; Holliday junction DNA helicase ruvB N-terminus;; AAA domain (Cdc48 subfamily);; AAA domain (dynein-related subfamily);; Viral (Superfamily 1) RNA helicase	Cell division control protein 48 homolog B OS=Arabidopsis thaliana OX=3702 GN=CDC48B PE=2 SV=1	O	Posttranslational modification, protein turnover, chaperones	PREDICTED: cell division control protein 48 homolog B [Daucus carota subsp. sativus]
c86961.graph_c0	397	802	445	182	81	116	18.81	40.71	24.94	11.06	4.65	5.82	0.000102056	-2.02906	down	--	--	--	--	--	--	LSD1 zinc finger;; LSD1 zinc finger	Protein LOL1 OS=Arabidopsis thaliana OX=3702 GN=LOL1 PE=2 SV=1	S	Function unknown	protein LOL1 [Manihot esculenta]
c67884.graph_c0	17	6	50	72	216	167	2.33	0.88	7.88	11.79	33.04	24.6	0.00589263	2.12502	up	--	--	Cellular Component: vacuole (GO:0005773);; Biological Process: copper ion transport (GO:0006825);; Cellular Component: endomembrane system (GO:0012505);; Cellular Component: membrane (GO:0016020);;	K14686|9.91218e-27|thj:104810995|K14686 solute carrier family 31 (copper transporter), member 1 | (RefSeq) copper transporter 5	[P]	Inorganic ion transport and metabolism	Ctr copper transporter family	Copper transporter 5 OS=Arabidopsis thaliana OX=3702 GN=COPT5 PE=1 SV=1	P	Inorganic ion transport and metabolism	PREDICTED: copper transporter 5.1-like [Daucus carota subsp. sativus]
c84073.graph_c0	1	138	37	1	0	0	0.03	4.18	1.2	0.03	0	0	0.0010456	-3.24636	down	[DPM]	Cell cycle control, cell division, chromosome partitioning ;; Inorganic ion transport and metabolism ;; Cell wall/membrane/envelope biogenesis	Molecular Function: copper ion binding (GO:0005507);; Cellular Component: plant-type cell wall (GO:0009505);; Cellular Component: plasmodesma (GO:0009506);; Cellular Component: membrane (GO:0016020);; Molecular Function: oxidoreductase activity, oxidizing metal ions (GO:0016722);; Biological Process: oxidation-reduction process (GO:0055114);;	--	[Q]	Secondary metabolites biosynthesis, transport and catabolism	Multicopper oxidase;; Multicopper oxidase;; Multicopper oxidase	L-ascorbate oxidase homolog OS=Brassica napus OX=3708 GN=Bp10 PE=2 SV=1	Q	Secondary metabolites biosynthesis, transport and catabolism	PREDICTED: L-ascorbate oxidase homolog [Daucus carota subsp. sativus]
c85215.graph_c0	332	319	425	731	1309	986	20.64	20.89	30.94	54.21	89.97	66.03	4.96555e-06	1.34816	up	[K]	Transcription	--	--	--	--	Leucine rich repeat;; Leucine Rich repeats (2 copies);; Eukaryotic phosphomannomutase	Protein SUPPRESSOR OF npr1-1, CONSTITUTIVE 1 OS=Arabidopsis thaliana OX=3702 GN=SNC1 PE=1 SV=5	S	Function unknown	hypothetical protein DCAR_029356 [Daucus carota subsp. sativus]
c79379.graph_c0	58	36	79	281	330	259	4.08	3.48	5.61	20.47	22.33	17.06	4.88003e-09	2.15279	up	--	--	Molecular Function: DNA binding (GO:0003677);; Cellular Component: nucleus (GO:0005634);; Biological Process: regulation of transcription, DNA-templated (GO:0006355);;	--	--	--	No apical meristem (NAM) protein	NAC domain-containing protein 100 OS=Arabidopsis thaliana OX=3702 GN=NAC100 PE=2 SV=1	S	Function unknown	PREDICTED: NAC domain-containing protein 100-like [Daucus carota subsp. sativus]
c84195.graph_c0	3656	4834	2793	1739	751	1185	70.68	100.36	62.01	39.5	15.87	24.56	0.000940562	-1.58431	down	--	--	Molecular Function: catalytic activity (GO:0003824);; Biological Process: carbohydrate metabolic process (GO:0005975);; Molecular Function: carbohydrate binding (GO:0030246);;	--	--	--	--	Photosynthetic NDH subunit of subcomplex B 2, chloroplastic OS=Arabidopsis thaliana OX=3702 GN=PNSB2 PE=2 SV=1	S	Function unknown	PREDICTED: protein NDH-DEPENDENT CYCLIC ELECTRON FLOW 5 [Daucus carota subsp. sativus]
c90151.graph_c1	1107	1240	1037	473	337	397	40.58	48.92	43.54	20.4	13.37	15.36	1.54512e-06	-1.51951	down	--	--	Molecular Function: DNA binding (GO:0003677);; Cellular Component: nucleus (GO:0005634);; Biological Process: regulation of transcription, DNA-templated (GO:0006355);;	--	[O]	Posttranslational modification, protein turnover, chaperones	Myb-like DNA-binding domain	Transcription factor MYBS1 OS=Oryza sativa subsp. japonica OX=39947 GN=MYBS1 PE=1 SV=1	K	Transcription	PREDICTED: transcription factor DIVARICATA [Daucus carota subsp. sativus]
c84292.graph_c0	20	42	37	3	1	2	0.76	1.96	1.91	0.13	0.04	0.17	0.000154517	-3.08717	down	--	--	Cellular Component: integral component of membrane (GO:0016021);; Biological Process: oxidation-reduction process (GO:0055114);;	--	[T]	Signal transduction mechanisms	Eukaryotic cytochrome b561	Cytochrome b561 domain-containing protein At4g18260 OS=Arabidopsis thaliana OX=3702 GN=At4g18260 PE=2 SV=1	S	Function unknown	PREDICTED: cytochrome b561 domain-containing protein At4g18260-like isoform X2 [Daucus carota subsp. sativus]
c91508.graph_c0	4897	12350	5643	3416	1842	2497	164.26	424.3	217.91	132.95	65.86	85.27	0.00495481	-1.54054	down	[H]	Coenzyme transport and metabolism	Biological Process: protoporphyrinogen IX biosynthetic process (GO:0006782);; Molecular Function: glutamyl-tRNA reductase activity (GO:0008883);; Molecular Function: NADP binding (GO:0050661);; Biological Process: oxidation-reduction process (GO:0055114);;	K02492|0|vvi:100259052|K02492 glutamyl-tRNA reductase [EC:1.2.1.70] | (RefSeq) glutamyl-tRNA reductase 1, chloroplastic-like	--	--	Shikimate / quinate 5-dehydrogenase;; Glutamyl-tRNAGlu reductase, N-terminal domain;; Glutamyl-tRNAGlu reductase, dimerisation domain;; NADP oxidoreductase coenzyme F420-dependent;; NAD binding domain of 6-phosphogluconate dehydrogenase;; Ornithine cyclodeaminase/mu-crystallin family	Glutamyl-tRNA reductase 1, chloroplastic OS=Cucumis sativus OX=3659 GN=HEMA1 PE=2 SV=1	H	Coenzyme transport and metabolism	PREDICTED: glutamyl-tRNA reductase 1, chloroplastic-like [Daucus carota subsp. sativus]
c78056.graph_c0	448	249	276	655	665	778	30.26	18.09	21.42	52.35	49.38	56.16	0.00372252	1.01508	up	[J]	Translation, ribosomal structure and biogenesis	Molecular Function: RNA binding (GO:0003723);; Cellular Component: nucleolus (GO:0005730);;	K11884|1.38121e-137|vvi:100249193|K11884 RNA-binding protein PNO1 | (RefSeq) RNA-binding protein PNO1-like	[O]	Posttranslational modification, protein turnover, chaperones	KH domain	--	S	Function unknown	hypothetical protein DCAR_013538 [Daucus carota subsp. sativus]
c84543.graph_c1	182	141	116	250	597	498	7.52	6.28	6.14	12.84	32.02	25.5	0.000769698	1.43395	up	[K]	Transcription	Molecular Function: zinc ion binding (GO:0008270);; Cellular Component: integral component of membrane (GO:0016021);; Molecular Function: oxidoreductase activity (GO:0016491);; Molecular Function: protein-cysteine S-palmitoyltransferase activity (GO:0019706);; Biological Process: oxidation-reduction process (GO:0055114);;	K20029|2.45706e-135|cmo:103486378|K20029 palmitoyltransferase ZDHHC3/7/25 [EC:2.3.1.225] | (RefSeq) probable protein S-acyltransferase 16	[R]	General function prediction only	DHHC palmitoyltransferase;; RNA polymerase Rpb1, domain 5	DNA-directed RNA polymerase subunit beta&apos;&apos; OS=Daucus carota OX=4039 GN=rpoC2 PE=3 SV=1	S	Function unknown	PREDICTED: probable protein S-acyltransferase 16 [Daucus carota subsp. sativus]
c71825.graph_c0	924	1451	734	516	282	397	41.9	70.81	38.18	27.63	13.97	19.19	0.00581597	-1.37678	down	[H]	Coenzyme transport and metabolism	Molecular Function: dimethylallyltranstransferase activity (GO:0004161);; Molecular Function: farnesyltranstransferase activity (GO:0004311);; Molecular Function: geranyltranstransferase activity (GO:0004337);; Cellular Component: chloroplast (GO:0009507);; Biological Process: carotenoid biosynthetic process (GO:0016117);; Biological Process: geranyl diphosphate biosynthetic process (GO:0033384);…	K13789|8.78732e-176|sind:105166180|K13789 geranylgeranyl diphosphate synthase, type II [EC:2.5.1.1 2.5.1.10 2.5.1.29] | (RefSeq) geranylgeranyl pyrophosphate synthase, chloroplastic-like	[H]	Coenzyme transport and metabolism	Polyprenyl synthetase	Geranylgeranyl pyrophosphate synthase, chloroplastic OS=Capsicum annuum OX=4072 GN=GGPS1 PE=3 SV=1	H	Coenzyme transport and metabolism	geranylgeranyl pyrophosphate synthase [Trachyspermum ammi]
c83344.graph_c1	1806	2076	1486	947	889	907	100.75	124.59	94.65	62.74	54.58	54.15	0.000720648	-1.03549	down	--	--	Cellular Component: nucleus (GO:0005634);; Biological Process: regulation of transcription, DNA-templated (GO:0006355);; Biological Process: auxin-activated signaling pathway (GO:0009734);;	K14484|7.0927e-48|nnu:104612448|K14484 auxin-responsive protein IAA | (RefSeq) auxin-responsive protein IAA4-like	--	--	AUX/IAA family	Auxin-induced protein 22D OS=Vigna radiata var. radiata OX=3916 GN=AUX22D PE=2 SV=1	K	Transcription	PREDICTED: auxin-induced protein 22D-like [Daucus carota subsp. sativus]
c89219.graph_c0	2594	1552	2141	1209	820	1134	88.56	57.01	83.84	48.56	30.53	41.2	0.00580831	-1.00702	down	[O]	Posttranslational modification, protein turnover, chaperones	Biological Process: cellular process (GO:0009987);; Biological Process: single-organism process (GO:0044699);;	K17479|4.39127e-103|spen:107029086|K17479 glutaredoxin domain-containing cysteine-rich protein 1 | (RefSeq) glutaredoxin domain-containing cysteine-rich protein 1	[O]	Posttranslational modification, protein turnover, chaperones	Glutaredoxin	Uncharacterized protein At5g39865 OS=Arabidopsis thaliana OX=3702 GN=At5g39865 PE=2 SV=1	O	Posttranslational modification, protein turnover, chaperones	PREDICTED: glutaredoxin domain-containing cysteine-rich protein 1 [Daucus carota subsp. sativus]
c89211.graph_c0	2638	2660	2356	1365	908	1234	190.48	197.49	183.42	129.66	101.34	123.45	0.00052072	-1.16104	down	--	--	Molecular Function: protein serine/threonine kinase activity (GO:0004674);; Molecular Function: ATP binding (GO:0005524);; Biological Process: protein phosphorylation (GO:0006468);; Biological Process: signal transduction (GO:0007165);;	--	[T]	Signal transduction mechanisms	--	CBL-interacting serine/threonine-protein kinase 3 OS=Arabidopsis thaliana OX=3702 GN=CIPK3 PE=1 SV=2	T	Signal transduction mechanisms	CBL-interacting serine/threonine-protein kinase 3-like isoform X1 [Durio zibethinus]
c80365.graph_c0	440	418	288	206	179	105	19.79	20.2	14.9	10.88	8.77	4.99	0.0052869	-1.25023	down	[G]	Carbohydrate transport and metabolism	--	--	--	--	Starch binding domain	--	S	Function unknown	PREDICTED: uncharacterized protein LOC108218578 [Daucus carota subsp. sativus]
c79534.graph_c0	672	537	484	295	151	210	49.92	43.29	41.26	26.21	12.41	16.62	0.00155295	-1.35379	down	--	--	Cellular Component: plasma membrane (GO:0005886);; Cellular Component: integral component of membrane (GO:0016021);; Molecular Function: transmembrane transporter activity (GO:0022857);; Biological Process: transmembrane transport (GO:0055085);;	--	--	--	--	Uncharacterized protein At4g15545 OS=Arabidopsis thaliana OX=3702 GN=At4g15545 PE=1 SV=1	S	Function unknown	PREDICTED: uncharacterized protein At4g15545 [Daucus carota subsp. sativus]
c72317.graph_c0	61	121	66	23	24	13	2.77	6.31	4.2	1.78	1.4	0.81	0.00217519	-1.93686	down	--	--	--	K21026|2.71664e-129|pmum:103324870|K21026 acetylajmaline esterase [EC:3.1.1.80] | (RefSeq) GDSL esterase/lipase At5g45910	--	--	--	GDSL esterase/lipase At5g45910 OS=Arabidopsis thaliana OX=3702 GN=At5g45910 PE=2 SV=1	S	Function unknown	PREDICTED: GDSL esterase/lipase At5g45910-like [Daucus carota subsp. sativus]
c84269.graph_c0	193	196	86	25	10	36	31.08	34.78	15.56	4.32	1.72	6.46	9.01657e-05	-2.45945	down	--	--	--	K14488|1.90841e-35|nnu:104607461|K14488 SAUR family protein | (RefSeq) auxin-induced protein 6B-like	--	--	Auxin responsive protein	Indole-3-acetic acid-induced protein ARG7 OS=Vigna radiata var. radiata OX=3916 GN=ARG7 PE=2 SV=1	S	Function unknown	PREDICTED: auxin-responsive protein SAUR20-like [Daucus carota subsp. sativus]
c77131.graph_c0	6	40	40	1	3	3	0.27	2.03	2.23	0.05	0.15	0.17	0.00830972	-2.55587	down	[G]	Carbohydrate transport and metabolism	Cellular Component: integral component of plasma membrane (GO:0005887);; Biological Process: water transport (GO:0006833);; Cellular Component: plant-type vacuole membrane (GO:0009705);; Biological Process: cellular water homeostasis (GO:0009992);; Molecular Function: water channel activity (GO:0015250);; Molecular Function: glycerol channel activity (GO:0015254);; Biological Process: glycerol tr…	K09873|2.09863e-96|spen:107021432|K09873 aquaporin TIP | (RefSeq) aquaporin TIP1-3-like	[G]	Carbohydrate transport and metabolism	Major intrinsic protein	Probable aquaporin TIP1-2 OS=Oryza sativa subsp. japonica OX=39947 GN=TIP1-2 PE=2 SV=1	G	Carbohydrate transport and metabolism	aquaporin protein 6 [Camellia sinensis]
c88890.graph_c1	583	501	467	1056	1446	1431	18.99	16.98	18.07	39.64	51.18	50.27	3.05961e-07	1.22853	up	[T]	Signal transduction mechanisms	Biological Process: phosphorelay signal transduction system (GO:0000160);; Molecular Function: DNA binding (GO:0003677);; Molecular Function: transcription factor activity, sequence-specific DNA binding (GO:0003700);; Cellular Component: nucleus (GO:0005634);; Biological Process: regulation of transcription, DNA-templated (GO:0006355);; Cellular Component: integral component of membrane (GO:00160…	K14491|3.27652e-131|vvi:100250889|K14491 two-component response regulator ARR-B family | (RefSeq) two-component response regulator ARR12-like	[K]	Transcription	Response regulator receiver domain;; Myb-like DNA-binding domain	Two-component response regulator ORR24 OS=Oryza sativa subsp. indica OX=39946 GN=RR24 PE=3 SV=1	K	Transcription	PREDICTED: two-component response regulator ARR12 [Daucus carota subsp. sativus]
c74392.graph_c0	11	28	11	37	147	105	1.34	3.65	1.53	5.29	19.64	13.49	0.00861879	1.99754	up	--	--	Molecular Function: ATP binding (GO:0005524);; Biological Process: protein folding (GO:0006457);; Biological Process: response to stress (GO:0006950);; Molecular Function: unfolded protein binding (GO:0051082);;	K04079|1.79168e-31|vvi:104878626|K04079 molecular chaperone HtpG | (RefSeq) heat shock cognate protein 80-like	[O]	Posttranslational modification, protein turnover, chaperones	Hsp90 protein	Heat shock cognate protein 80 OS=Solanum lycopersicum OX=4081 GN=HSC80 PE=2 SV=1	O	Posttranslational modification, protein turnover, chaperones	PREDICTED: heat shock protein 90-2-like [Daucus carota subsp. sativus]
c76388.graph_c0	177	219	139	74	95	45	4.7	6.23	4.22	2.29	2.7	1.26	0.0065515	-1.35353	down	[E]	Amino acid transport and metabolism	Cellular Component: cytosol (GO:0005829);; Biological Process: proteolysis (GO:0006508);; Molecular Function: serine-type peptidase activity (GO:0008236);; Cellular Component: chloroplast (GO:0009507);;	--	[O]	Posttranslational modification, protein turnover, chaperones	Prolyl oligopeptidase family;; Dienelactone hydrolase family;; X-Pro dipeptidyl-peptidase (S15 family);; alpha/beta hydrolase fold	Acylamino-acid-releasing enzyme OS=Arabidopsis thaliana OX=3702 GN=AARE PE=1 SV=1	E	Amino acid transport and metabolism	PREDICTED: inactive dipeptidyl peptidase 10-like isoform X1 [Daucus carota subsp. sativus]
c79621.graph_c1	12	6	13	42	92	71	1.16	1.03	1.31	4.5	10.69	7.39	0.000161496	2.32455	up	--	--	Cellular Component: vacuolar membrane (GO:0005774);; Cellular Component: plasma membrane (GO:0005886);; Biological Process: regulation of pH (GO:0006885);; Biological Process: response to salt stress (GO:0009651);; Molecular Function: sodium:proton antiporter activity (GO:0015385);; Cellular Component: integral component of membrane (GO:0016021);; Biological Process: sodium ion transmembrane tran…	--	--	--	--	--	P	Inorganic ion transport and metabolism	PREDICTED: sodium/hydrogen exchanger 2-like [Daucus carota subsp. sativus]
c91803.graph_c0	182	147	257	93	51	59	4.62	3.94	7.63	2.86	1.48	1.58	0.00314652	-1.4834	down	--	--	Cellular Component: integral component of membrane (GO:0016021);;	--	--	--	Plant protein of unknown function	UPF0481 protein At3g47200 OS=Arabidopsis thaliana OX=3702 GN=At3g47200 PE=2 SV=1	S	Function unknown	PREDICTED: UPF0481 protein At3g47200-like [Daucus carota subsp. sativus]
c89872.graph_c0	654	731	487	262	241	245	10.68	12.85	9.13	5.02	4.27	4.25	3.14297e-05	-1.37122	down	--	--	--	K17710|0|sind:105155710|K17710 pentatricopeptide repeat domain-containing protein 1 | (RefSeq) pentatricopeptide repeat-containing protein At2g18940, chloroplastic	[R]	General function prediction only	PPR repeat family;; PPR repeat;; PPR repeat;; Pentatricopeptide repeat domain;; Pentacotripeptide-repeat region of PRORP;; Tetratricopeptide repeat;; Tetratricopeptide repeat;; Mitochondrial ATPase expression;; Evolutionarily conserved signalling intermediate in Toll pathway	Pentatricopeptide repeat-containing protein At2g18940, chloroplastic OS=Arabidopsis thaliana OX=3702 GN=At2g18940 PE=2 SV=1	S	Function unknown	PREDICTED: pentatricopeptide repeat-containing protein At2g18940, chloroplastic [Daucus carota subsp. sativus]
c84293.graph_c0	74	94	54	17	23	30	3.21	4.36	2.69	0.87	1.11	1.33	0.00851016	-1.60718	down	[M]	Cell wall/membrane/envelope biogenesis	Biological Process: polysaccharide biosynthetic process (GO:0000271);; Cellular Component: Golgi apparatus (GO:0005794);; Molecular Function: transferase activity, transferring glycosyl groups (GO:0016757);;	K20893|0|spen:107016094|K20893 probable galacturonosyltransferase-like 1 [EC:2.4.1.-] | (RefSeq) probable galacturonosyltransferase-like 1	--	--	Glycosyl transferase family 8	Probable galacturonosyltransferase-like 1 OS=Arabidopsis thaliana OX=3702 GN=GATL1 PE=2 SV=1	O	Posttranslational modification, protein turnover, chaperones	PREDICTED: probable galacturonosyltransferase-like 1 [Daucus carota subsp. sativus]
c74369.graph_c0	73	56	37	17	6	12	5	4.07	3.11	1.4	0.44	0.78	0.00656194	-1.97179	down	--	--	--	K19042|3.082e-63|pmum:103334830|K19042 E3 ubiquitin-protein ligase BOI and related proteins [EC:2.3.2.27] | (RefSeq) probable BOI-related E3 ubiquitin-protein ligase 3	[O]	Posttranslational modification, protein turnover, chaperones	Zinc finger, C3HC4 type (RING finger)	Probable BOI-related E3 ubiquitin-protein ligase 3 OS=Arabidopsis thaliana OX=3702 GN=BRG3 PE=1 SV=1	S	Function unknown	PREDICTED: probable BOI-related E3 ubiquitin-protein ligase 2 [Daucus carota subsp. sativus]
c88273.graph_c0	337	913	636	112	90	95	11.11	31.36	24.1	4.4	3.31	3.54	2.34074e-08	-2.58662	down	--	--	--	--	--	--	Protein of unknown function (DUF4005)	Protein IQ-DOMAIN 1 OS=Arabidopsis thaliana OX=3702 GN=IQD1 PE=1 SV=1	Z	Cytoskeleton	PREDICTED: protein IQ-DOMAIN 1-like [Daucus carota subsp. sativus]
c72355.graph_c0	53	52	52	145	270	186	5.11	5.4	5.76	16.61	28.79	19.21	3.63499e-06	1.74627	up	[I]	Lipid transport and metabolism	Cellular Component: endoplasmic reticulum membrane (GO:0005789);; Biological Process: unsaturated fatty acid biosynthetic process (GO:0006636);; Cellular Component: integral component of membrane (GO:0016021);; Molecular Function: oxidoreductase activity, acting on paired donors, with oxidation of a pair of donors resulting in the reduction of molecular oxygen to two molecules of water (GO:001671…	K10256|2.09737e-50|gmx:100780912|K10256 omega-6 fatty acid desaturase / acyl-lipid omega-6 desaturase (Delta-12 desaturase) [EC:1.14.19.6 1.14.19.22] | (RefSeq) omega-6 fatty acid desaturase, endoplasmic reticulum isozyme 2-like	--	--	Fatty acid desaturase	Omega-6 fatty acid desaturase, endoplasmic reticulum isozyme 2 OS=Glycine max OX=3847 GN=FAD2-2 PE=2 SV=1	I	Lipid transport and metabolism	omega-6 fatty acid desaturase [Petroselinum crispum]
c91009.graph_c1	746	496	872	1423	2671	2264	33.65	24.52	43.59	69.85	115.54	99.88	8.51713e-06	1.44864	up	[T]	Signal transduction mechanisms	Molecular Function: protein serine/threonine kinase activity (GO:0004674);; Molecular Function: ATP binding (GO:0005524);; Biological Process: protein phosphorylation (GO:0006468);; Cellular Component: integral component of membrane (GO:0016021);;	--	[T]	Signal transduction mechanisms	Protein kinase domain;; Protein tyrosine kinase	Calmodulin-binding receptor-like cytoplasmic kinase 3 OS=Arabidopsis thaliana OX=3702 GN=CRCK3 PE=2 SV=1	T	Signal transduction mechanisms	hypothetical protein DCAR_009329 [Daucus carota subsp. sativus]
c86405.graph_c0	664	397	652	1215	1697	1352	28.04	17.2	31.26	58.44	78.11	60.44	8.05838e-06	1.20748	up	--	--	Molecular Function: DNA binding (GO:0003677);;	--	--	--	Domain of unknown function (DUF296)	AT-hook motif nuclear-localized protein 10 OS=Arabidopsis thaliana OX=3702 GN=AHL10 PE=1 SV=2	S	Function unknown	PREDICTED: AT-hook motif nuclear-localized protein 10-like [Daucus carota subsp. sativus]
c73922.graph_c0	506	343	603	1439	3652	2346	31.52	22.94	43.05	105.81	249.68	155.92	2.17664e-09	2.15214	up	--	--	--	--	--	--	--	--	--	--	PREDICTED: cell wall protein IFF6-like [Daucus carota subsp. sativus]
c81956.graph_c0	93	42	125	305	1143	518	4.38	2.59	6.21	15.76	59.27	24.79	1.37337e-06	2.54937	up	--	--	Molecular Function: phosphatidylinositol phospholipase C activity (GO:0004435);; Molecular Function: signal transducer activity (GO:0004871);; Cellular Component: intracellular (GO:0005622);; Biological Process: lipid catabolic process (GO:0016042);; Biological Process: intracellular signal transduction (GO:0035556);;	K05857|5.79427e-35|cam:101504660|K05857 phosphatidylinositol phospholipase C, delta [EC:3.1.4.11] | (RefSeq) phosphoinositide phospholipase C 2-like	[T]	Signal transduction mechanisms	Phosphatidylinositol-specific phospholipase C, X domain	Phosphoinositide phospholipase C 2 OS=Arabidopsis thaliana OX=3702 GN=PLC2 PE=1 SV=1	S	Function unknown	hypothetical protein DCAR_028850 [Daucus carota subsp. sativus]
c62129.graph_c0	787	930	798	316	567	318	111.46	141.88	129.72	53.49	89.69	48.38	0.000722229	-1.15531	down	[G]	Carbohydrate transport and metabolism	Biological Process: glucose metabolic process (GO:0006006);; Molecular Function: oxidoreductase activity, acting on the aldehyde or oxo group of donors, NAD or NADP as acceptor (GO:0016620);; Molecular Function: NADP binding (GO:0050661);; Molecular Function: NAD binding (GO:0051287);; Biological Process: oxidation-reduction process (GO:0055114);;	K05298|3.74948e-98|mdm:103409404|K05298 glyceraldehyde-3-phosphate dehydrogenase (NADP+) (phosphorylating) [EC:1.2.1.13] | (RefSeq) glyceraldehyde-3-phosphate dehydrogenase B, chloroplastic	[G]	Carbohydrate transport and metabolism	Glyceraldehyde 3-phosphate dehydrogenase, NAD binding domain;; Glyceraldehyde 3-phosphate dehydrogenase, C-terminal domain	Glyceraldehyde-3-phosphate dehydrogenase GAPB, chloroplastic OS=Arabidopsis thaliana OX=3702 GN=GAPB PE=1 SV=2	G	Carbohydrate transport and metabolism	PREDICTED: glyceraldehyde-3-phosphate dehydrogenase B, chloroplastic-like [Daucus carota subsp. sativus]
c82835.graph_c0	76	52	83	232	316	372	2.78	2	3.45	9.73	12.29	14.07	2.88787e-08	1.96371	up	--	--	Biological Process: cellular glucose homeostasis (GO:0001678);; Molecular Function: glucokinase activity (GO:0004340);; Molecular Function: ATP binding (GO:0005524);; Molecular Function: glucose binding (GO:0005536);; Cellular Component: cytosol (GO:0005829);; Biological Process: glycolytic process (GO:0006096);; Molecular Function: fructokinase activity (GO:0008865);; Molecular Function: mannoki…	K00844|1.55708e-55|mdm:103449875|K00844 hexokinase [EC:2.7.1.1] | (RefSeq) hexokinase-1-like	[G]	Carbohydrate transport and metabolism	Hexokinase;; AUX/IAA family	Hexokinase-1 OS=Nicotiana tabacum OX=4097 GN=HXK1 PE=2 SV=1	G	Carbohydrate transport and metabolism	hypothetical protein DCAR_026354 [Daucus carota subsp. sativus]
c85213.graph_c0	1490	1383	851	433	277	339	95.87	95.59	62.76	32.93	19.52	23.2	1.77856e-06	-1.81416	down	[OT]	Posttranslational modification, protein turnover, chaperones ;; Signal transduction mechanisms	Biological Process: metabolic process (GO:0008152);; Molecular Function: amino acid binding (GO:0016597);;	--	--	--	--	ACT domain-containing protein ACR11 OS=Arabidopsis thaliana OX=3702 GN=ACR11 PE=1 SV=1	S	Function unknown	hypothetical protein DCAR_021386 [Daucus carota subsp. sativus]
c79091.graph_c0	735	639	791	1297	1964	1580	22.43	20.99	27.67	46.54	65.21	51.3	4.1626e-06	1.04652	up	[C]	Energy production and conversion	Molecular Function: retinal dehydrogenase activity (GO:0001758);; Biological Process: phenylpropanoid biosynthetic process (GO:0009699);; Molecular Function: coniferyl-aldehyde dehydrogenase activity (GO:0050269);; Biological Process: oxidation-reduction process (GO:0055114);;	K12355|0|pmum:103340918|K12355 coniferyl-aldehyde dehydrogenase [EC:1.2.1.68] | (RefSeq) aldehyde dehydrogenase family 2 member C4	[C]	Energy production and conversion	Aldehyde dehydrogenase family	Aldehyde dehydrogenase family 2 member C4 OS=Arabidopsis thaliana OX=3702 GN=ALDH2C4 PE=1 SV=2	C	Energy production and conversion	PREDICTED: aldehyde dehydrogenase family 2 member C4-like [Daucus carota subsp. sativus]
c78252.graph_c0	293	515	467	211	158	148	24.13	44.96	43.86	20.43	14.15	12.95	0.0032701	-1.32838	down	--	--	--	--	--	--	--	--	S	Function unknown	hypothetical protein DCAR_004951 [Daucus carota subsp. sativus]
c88038.graph_c0	83	63	109	161	295	200	4.55	3.53	6.9	10.32	17.81	11.26	0.00485212	1.20509	up	--	--	--	--	--	--	--	Transcription factor bHLH104 OS=Arabidopsis thaliana OX=3702 GN=BHLH104 PE=1 SV=1	K	Transcription	PREDICTED: transcription factor bHLH104-like [Daucus carota subsp. sativus]
c90561.graph_c0	190	408	94	50	40	50	8	18.9	4.36	2.33	1.89	2.37	0.000770925	-2.14438	down	--	--	--	--	--	--	HEAT repeats	TORTIFOLIA1-like protein 3 OS=Arabidopsis thaliana OX=3702 GN=TOR1L3 PE=2 SV=1	S	Function unknown	PREDICTED: microtubule-associated protein TORTIFOLIA1-like isoform X1 [Daucus carota subsp. sativus]
c69771.graph_c0	122	531	192	44	21	49	5.13	25.41	9.25	2.18	1.11	2.68	0.000110428	-2.58541	down	[IR]	Lipid transport and metabolism ;; General function prediction only	Cellular Component: membrane (GO:0016020);; Molecular Function: hydrolase activity, acting on ester bonds (GO:0016788);;	K21026|2.19614e-136|pper:PRUPE_ppa019092mg|K21026 acetylajmaline esterase [EC:3.1.1.80] | (RefSeq) hypothetical protein	--	--	GDSL-like Lipase/Acylhydrolase	GDSL esterase/lipase At1g28580 OS=Arabidopsis thaliana OX=3702 GN=At1g28580 PE=2 SV=1	S	Function unknown	PREDICTED: GDSL esterase/lipase At1g28590-like [Daucus carota subsp. sativus]
c89592.graph_c0	44	64	65	144	175	143	1.48	2.55	2.44	6.46	6.23	5.1	0.00422456	1.24964	up	[G]	Carbohydrate transport and metabolism	Cellular Component: plasma membrane (GO:0005886);; Cellular Component: integral component of membrane (GO:0016021);; Molecular Function: substrate-specific transmembrane transporter activity (GO:0022891);; Biological Process: transmembrane transport (GO:0055085);; Molecular Function: nicotinate transporter activity (GO:0090416);; Molecular Function: N-methylnicotinate transporter activity (GO:009…	--	[R]	General function prediction only	Sugar (and other) transporter;; Major Facilitator Superfamily;; Sugar (and other) transporter	Organic cation/carnitine transporter 7 OS=Arabidopsis thaliana OX=3702 GN=OCT7 PE=2 SV=1	G	Carbohydrate transport and metabolism	PREDICTED: organic cation/carnitine transporter 7-like [Daucus carota subsp. sativus]
c79496.graph_c0	9741	21567	11597	1518	380	1363	738.81	1759.46	1009.18	136.38	31.8	110.52	5.50671e-10	-3.39203	down	--	--	Cellular Component: nucleus (GO:0005634);; Cellular Component: plant-type cell wall (GO:0009505);; Biological Process: response to cytokinin (GO:0009735);; Molecular Function: manganese ion binding (GO:0030145);; Cellular Component: extracellular matrix (GO:0031012);; Biological Process: oxalate metabolic process (GO:0033609);; Molecular Function: nutrient reservoir activity (GO:0045735);; Molecu…	--	--	--	Cupin;; Cupin domain	Auxin-binding protein ABP19a OS=Prunus persica OX=3760 GN=ABP19A PE=3 SV=1	S	Function unknown	PREDICTED: auxin-binding protein ABP19a [Daucus carota subsp. sativus]
c88988.graph_c0	127	457	297	45	38	52	5.17	20.12	13.48	1.96	1.5	2.2	5.72114e-06	-2.54445	down	[G]	Carbohydrate transport and metabolism	Molecular Function: polygalacturonase activity (GO:0004650);; Cellular Component: extracellular region (GO:0005576);; Biological Process: carbohydrate metabolic process (GO:0005975);; Biological Process: cell wall organization (GO:0071555);;	--	--	--	Glycosyl hydrolases family 28	Probable polygalacturonase OS=Vitis vinifera OX=29760 GN=GSVIVT00026920001 PE=1 SV=1	M	Cell wall/membrane/envelope biogenesis	PREDICTED: probable polygalacturonase [Daucus carota subsp. sativus]
c80558.graph_c0	115	84	79	18	11	8	3.91	3.1	3.05	0.71	0.41	0.29	4.73224e-07	-2.6946	down	--	--	--	--	--	--	--	--	S	Function unknown	PREDICTED: uncharacterized protein LOC108216671 [Daucus carota subsp. sativus]
c62276.graph_c0	228	302	544	66	119	92	19.21	27.37	52.61	6.59	11.05	8.67	2.27312e-05	-1.93844	down	--	--	--	--	--	--	--	--	S	Function unknown	PREDICTED: phylloplanin-like [Daucus carota subsp. sativus]
c79413.graph_c0	1600	1597	1340	483	347	345	97.33	103.64	92.34	33.6	21.99	21.09	3.55272e-11	-1.96696	down	--	--	--	--	--	--	Protein of unknown function (DUF1685)	--	S	Function unknown	PREDICTED: uncharacterized protein LOC108221284 [Daucus carota subsp. sativus]
c84373.graph_c0	15	9	5	30	117	71	0.67	0.44	0.26	1.63	5.91	3.48	0.00126623	2.34689	up	--	--	Cellular Component: integral component of membrane (GO:0016021);; Molecular Function: transmembrane transporter activity (GO:0022857);; Biological Process: transmembrane transport (GO:0055085);;	--	--	--	EamA-like transporter family	WAT1-related protein At5g64700 OS=Arabidopsis thaliana OX=3702 GN=At5g64700 PE=2 SV=1	S	Function unknown	PREDICTED: WAT1-related protein At5g64700 [Daucus carota subsp. sativus]
c71790.graph_c0	660	356	262	111	56	72	51.13	29.7	23.32	10.17	4.77	5.98	2.66357e-06	-2.27584	down	--	--	Cellular Component: cell (GO:0005623);; Molecular Function: electron carrier activity (GO:0009055);; Molecular Function: protein disulfide oxidoreductase activity (GO:0015035);; Biological Process: cell redox homeostasis (GO:0045454);; Biological Process: oxidation-reduction process (GO:0055114);;	K03676|3.13976e-37|pxb:103943627|K03676 glutaredoxin 3 | (RefSeq) monothiol glutaredoxin-S2	[O]	Posttranslational modification, protein turnover, chaperones	Glutaredoxin	Monothiol glutaredoxin-S2 OS=Arabidopsis thaliana OX=3702 GN=GRXS2 PE=3 SV=1	O	Posttranslational modification, protein turnover, chaperones	PREDICTED: monothiol glutaredoxin-S2-like [Daucus carota subsp. sativus]
c90521.graph_c1	53453	34753	37597	26514	16428	16534	1370.25	963.39	1102.73	810.13	461.84	460.43	0.0039599	-1.0925	down	--	--	Biological Process: transcription, DNA-templated (GO:0006351);; Biological Process: regulation of biological process (GO:0050789);;	K12133|3.56145e-119|vvi:100250535|K12133 MYB-related transcription factor LHY | (RefSeq) protein LHY	[O]	Posttranslational modification, protein turnover, chaperones	--	Protein LHY OS=Arabidopsis thaliana OX=3702 GN=LHY PE=1 SV=2	K	Transcription	PREDICTED: protein LHY [Daucus carota subsp. sativus]
c76448.graph_c0	150	41	132	452	814	682	14.63	4.05	13.3	52.33	81.97	68.3	3.92907e-07	2.3525	up	--	--	Cellular Component: membrane (GO:0016020);; Biological Process: response to stimulus (GO:0050896);;	K17279|1.96195e-14|sbi:SORBI_05g017950|K17279 receptor expression-enhancing protein 5/6 | (RefSeq) SORBIDRAFT_05g017950, Sb05g017950; hypothetical protein	[U]	Intracellular trafficking, secretion, and vesicular transport	TB2/DP1, HVA22 family	HVA22-like protein e OS=Arabidopsis thaliana OX=3702 GN=HVA22E PE=2 SV=1	U	Intracellular trafficking, secretion, and vesicular transport	PREDICTED: HVA22-like protein e [Daucus carota subsp. sativus]
c88291.graph_c0	328	284	265	108	193	143	22.95	22.03	18.94	7.91	12.81	8.95	0.00216579	-1.0554	down	[E]	Amino acid transport and metabolism	--	--	[H]	Coenzyme transport and metabolism	--	Molybdenum cofactor sulfurase OS=Oryza sativa subsp. japonica OX=39947 GN=MCSU3 PE=2 SV=2	E	Amino acid transport and metabolism	PREDICTED: uncharacterized protein LOC108205863 [Daucus carota subsp. sativus]
c89407.graph_c0	179	213	66	15	4	10	3.92	5.01	1.65	0.39	0.1	0.23	9.37937e-08	-3.4379	down	[E]	Amino acid transport and metabolism	Biological Process: transport (GO:0006810);; Cellular Component: membrane (GO:0016020);;	K14638|0|pop:POPTR_0001s18640g|K14638 solute carrier family 15 (peptide/histidine transporter), member 3/4 | (RefSeq) POPTRDRAFT_751814; hypothetical protein	[E]	Amino acid transport and metabolism	POT family;; POT family	Protein NRT1/ PTR FAMILY 1.2 OS=Arabidopsis thaliana OX=3702 GN=NPF1.2 PE=1 SV=1	E	Amino acid transport and metabolism	PREDICTED: protein NRT1/ PTR FAMILY 1.1-like [Daucus carota subsp. sativus]
c77822.graph_c0	78	40	70	124	217	168	4.66	2.5	4.66	8.81	14.55	11.19	0.00448161	1.28296	up	--	--	--	--	--	--	--	DDT domain-containing protein DDR4 OS=Arabidopsis thaliana OX=3702 GN=DDR4 PE=1 SV=1	--	--	hypothetical protein DCAR_016526 [Daucus carota subsp. sativus]
c80063.graph_c0	71	77	65	11	11	7	2.53	2.96	2.73	0.48	0.46	0.29	7.43122e-07	-2.68459	down	--	--	Molecular Function: hydrolase activity, hydrolyzing O-glycosyl compounds (GO:0004553);; Cellular Component: cell wall (GO:0005618);; Biological Process: xyloglucan metabolic process (GO:0010411);; Molecular Function: xyloglucan:xyloglucosyl transferase activity (GO:0016762);; Biological Process: cell wall biogenesis (GO:0042546);; Cellular Component: apoplast (GO:0048046);; Biological Process: ce…	K08235|3.8022e-12|thj:104819522|K08235 xyloglucan:xyloglucosyl transferase [EC:2.4.1.207] | (RefSeq) probable xyloglucan endotransglucosylase/hydrolase protein 10	--	--	--	Xyloglucan endotransglucosylase/hydrolase protein 15 OS=Arabidopsis thaliana OX=3702 GN=XTH15 PE=1 SV=1	G	Carbohydrate transport and metabolism	unnamed protein product [Coffea canephora]
c81313.graph_c0	113	140	77	23	26	12	4.82	6.38	3.74	1.15	1.2	0.54	1.65872e-05	-2.31855	down	[K]	Transcription	Cellular Component: membrane (GO:0016020);; Molecular Function: kinase activity (GO:0016301);; Biological Process: phosphorylation (GO:0016310);;	--	--	--	Leucine rich repeat;; Leucine Rich repeats (2 copies);; Leucine rich repeat N-terminal domain;; Leucine Rich Repeat	Probable inactive receptor kinase At4g23740 OS=Arabidopsis thaliana OX=3702 GN=At4g23740 PE=2 SV=1	S	Function unknown	PREDICTED: probable inactive receptor kinase At4g23740 [Daucus carota subsp. sativus]
c83636.graph_c0	104	146	72	31	12	26	2.74	4.15	2.18	0.96	0.35	0.73	0.00139329	-2.03605	down	[T]	Signal transduction mechanisms	Molecular Function: nucleotide binding (GO:0000166);; Molecular Function: protein kinase activity (GO:0004672);; Biological Process: phosphorylation (GO:0016310);;	--	[T]	Signal transduction mechanisms	Protein kinase domain;; Protein tyrosine kinase	Probable serine/threonine-protein kinase PBL26 OS=Arabidopsis thaliana OX=3702 GN=PBL26 PE=2 SV=1	T	Signal transduction mechanisms	PREDICTED: serine/threonine-protein kinase CDL1-like [Daucus carota subsp. sativus]
c82039.graph_c0	83	75	156	232	297	273	2.31	2.37	4.65	7.56	8.9	8.09	0.00848437	1.20287	up	--	--	Cellular Component: integral component of membrane (GO:0016021);;	--	[S]	Function unknown	Domain of unknown function (DUF4782)	C2 and GRAM domain-containing protein At1g03370 OS=Arabidopsis thaliana OX=3702 GN=At1g03370 PE=2 SV=4	S	Function unknown	hypothetical protein DCAR_022847 [Daucus carota subsp. sativus]
c81951.graph_c0	80	186	108	18	3	15	5.02	13	8.74	1.45	0.2	1.35	2.7599e-05	-2.89535	down	--	--	Molecular Function: hydrolase activity, hydrolyzing O-glycosyl compounds (GO:0004553);; Cellular Component: cell wall (GO:0005618);; Cellular Component: integral component of plasma membrane (GO:0005887);; Biological Process: plant-type cell wall modification involved in multidimensional cell growth (GO:0009831);; Biological Process: xyloglucan metabolic process (GO:0010411);; Molecular Function:…	K08235|3.5314e-110|spen:107019061|K08235 xyloglucan:xyloglucosyl transferase [EC:2.4.1.207] | (RefSeq) probable xyloglucan endotransglucosylase/hydrolase protein 33	--	--	Glycosyl hydrolases family 16;; Xyloglucan endo-transglycosylase (XET) C-terminus;; Glycosyl hydrolases family 16	Probable xyloglucan endotransglucosylase/hydrolase protein 33 OS=Arabidopsis thaliana OX=3702 GN=XTH33 PE=2 SV=2	G	Carbohydrate transport and metabolism	hypothetical protein DCAR_026545 [Daucus carota subsp. sativus]
c82393.graph_c0	430	2372	1173	21	2	23	15.06	90.26	47.76	0.92	0.08	0.83	4.80691e-06	-4.02358	down	--	--	--	--	--	--	Hydrophobic seed protein;; Protease inhibitor/seed storage/LTP family;; Probable lipid transfer	Putative lipid-binding protein At4g00165 OS=Arabidopsis thaliana OX=3702 GN=At4g00165 PE=2 SV=1	O	Posttranslational modification, protein turnover, chaperones	PREDICTED: putative lipid-binding protein At4g00165 [Daucus carota subsp. sativus]
c92886.graph_c0	62	57	54	7	8	3	3.9	3.86	3.9	0.52	0.55	0.2	1.68375e-06	-2.92984	down	--	--	--	--	[R]	General function prediction only	PPR repeat family;; PPR repeat;; PPR repeat;; Pentatricopeptide repeat domain;; Pentacotripeptide-repeat region of PRORP	Pentatricopeptide repeat-containing protein At1g19720 OS=Arabidopsis thaliana OX=3702 GN=DYW7 PE=2 SV=1	S	Function unknown	PREDICTED: pentatricopeptide repeat-containing protein At1g19720 [Daucus carota subsp. sativus]
c82646.graph_c0	325	196	287	586	851	834	18.3	11.84	18.54	38.84	52.35	49.99	2.05024e-06	1.3757	up	--	--	Biological Process: lipid metabolic process (GO:0006629);; Cellular Component: integral component of membrane (GO:0016021);;	--	[I]	Lipid transport and metabolism	--	--	S	Function unknown	PREDICTED: lipase member N-like isoform X2 [Daucus carota subsp. sativus]
c83290.graph_c0	55615	70238	48959	28542	17863	22233	3326.55	4509.9	3340.59	1915.4	1097.75	1331.52	0.000199746	-1.37478	down	--	--	Cellular Component: photosystem I reaction center (GO:0009538);; Biological Process: photosynthesis (GO:0015979);; Cellular Component: integral component of membrane (GO:0016021);;	K02699|7.68768e-107|nnu:104605295|K02699 photosystem I subunit XI | (RefSeq) photosystem I reaction center subunit XI, chloroplastic	--	--	Photosystem I reaction centre subunit XI	Photosystem I reaction center subunit XI, chloroplastic OS=Spinacia oleracea OX=3562 GN=PSAL PE=1 SV=1	C	Energy production and conversion	PREDICTED: photosystem I reaction center subunit XI, chloroplastic-like [Daucus carota subsp. sativus]
c78398.graph_c0	28	75	38	9	7	4	1.38	3.96	2.14	0.52	0.38	0.21	0.0019156	-2.40612	down	--	--	Molecular Function: peroxidase activity (GO:0004601);; Cellular Component: extracellular region (GO:0005576);; Biological Process: response to oxidative stress (GO:0006979);; Cellular Component: plant-type cell wall (GO:0009505);; Biological Process: plant-type cell wall organization (GO:0009664);; Cellular Component: integral component of membrane (GO:0016021);; Molecular Function: heme binding …	K00430|0|rcu:8259183|K00430 peroxidase [EC:1.11.1.7] | (RefSeq) peroxidase 19	--	--	Peroxidase	Peroxidase 19 OS=Arabidopsis thaliana OX=3702 GN=PER19 PE=2 SV=1	G	Carbohydrate transport and metabolism	PREDICTED: peroxidase 19 [Daucus carota subsp. sativus]
c92452.graph_c0	232	167	263	101	129	96	8.48	6.55	12.16	5.1	5	4.23	0.00280003	-1.07275	down	--	--	--	--	--	--	NB-ARC domain;; TIR domain;; TIR domain;; MTH538 TIR-like domain (DUF1863)	TMV resistance protein N OS=Nicotiana glutinosa OX=35889 GN=N PE=1 SV=1	S	Function unknown	PREDICTED: TMV resistance protein N-like [Daucus carota subsp. sativus]
c73920.graph_c0	29	43	30	2	8	1	3.46	4.24	4.78	0.29	1.21	0.08	0.00229321	-2.58578	down	[G]	Carbohydrate transport and metabolism	Molecular Function: alpha,alpha-trehalose-phosphate synthase (UDP-forming) activity (GO:0003825);; Biological Process: trehalose biosynthetic process (GO:0005992);;	--	[G]	Carbohydrate transport and metabolism	Glycosyltransferase family 20;; Glycosyltransferase family 20	Alpha,alpha-trehalose-phosphate synthase [UDP-forming] 1 OS=Arabidopsis thaliana OX=3702 GN=TPS1 PE=1 SV=1	G	Carbohydrate transport and metabolism	trehalose-6-phosphate synthase, partial [Trifolium pratense]
c86731.graph_c0	64	515	436	9	9	8	2.57	21.91	20.21	0.45	0.4	0.3	7.72275e-12	-4.47916	down	--	--	Molecular Function: transcription factor activity, sequence-specific DNA binding (GO:0003700);; Biological Process: regulation of transcription, DNA-templated (GO:0006355);; Molecular Function: sequence-specific DNA binding (GO:0043565);;	--	--	--	--	Basic leucine zipper 61 OS=Arabidopsis thaliana OX=3702 GN=BZIP61 PE=1 SV=1	K	Transcription	PREDICTED: basic leucine zipper 61-like [Daucus carota subsp. sativus]
c71309.graph_c0	0	0	1	6	118	50	0	0	0.03	0.2	3.48	1.5	2.71369e-05	3.79815	up	--	--	Biological Process: anther development (GO:0048653);;	--	--	--	Helix-loop-helix DNA-binding domain;; bHLH-MYC and R2R3-MYB transcription factors N-terminal	Transcription factor ABORTED MICROSPORES OS=Arabidopsis thaliana OX=3702 GN=AMS PE=1 SV=2	K	Transcription	PREDICTED: transcription factor ABORTED MICROSPORES-like isoform X1 [Daucus carota subsp. sativus]
c75594.graph_c0	211	282	201	57	72	37	31.39	45.06	34.37	10.11	11.95	6.01	5.81433e-07	-2.06538	down	[J]	Translation, ribosomal structure and biogenesis	Molecular Function: translation elongation factor activity (GO:0003746);; Molecular Function: GTPase activity (GO:0003924);; Molecular Function: GTP binding (GO:0005525);; Cellular Component: mitochondrion (GO:0005739);; Cellular Component: chloroplast (GO:0009507);; Biological Process: mitochondrial translational elongation (GO:0070125);;	K02358|3.41122e-36|gra:105788622|K02358 elongation factor Tu | (RefSeq) elongation factor Tu, chloroplastic	[J]	Translation, ribosomal structure and biogenesis	Elongation factor Tu GTP binding domain	Elongation factor Tu, chloroplastic OS=Nicotiana tabacum OX=4097 GN=TUFA PE=3 SV=1	J	Translation, ribosomal structure and biogenesis	PREDICTED: elongation factor TuB, chloroplastic-like [Daucus carota subsp. sativus]
c68003.graph_c0	1409	1777	1269	722	807	667	85.25	115.71	88.06	51.59	53.5	43.1	0.000272009	-1.09863	down	--	--	Cellular Component: chloroplast stroma (GO:0009570);; Molecular Function: antioxidant activity (GO:0016209);; Molecular Function: oxidoreductase activity, acting on peroxide as acceptor (GO:0016684);;	--	[S]	Function unknown	AhpC/TSA antioxidant enzyme;; AhpC/TSA family	--	O	Posttranslational modification, protein turnover, chaperones	PREDICTED: prostamide/prostaglandin F synthase-like [Daucus carota subsp. sativus]
c92105.graph_c0	565	516	1106	2333	4627	3825	13.48	12.76	43.76	96.98	252.9	217.13	7.18278e-08	2.09297	up	[O]	Posttranslational modification, protein turnover, chaperones	Cellular Component: integral component of membrane (GO:0016021);; Biological Process: transmembrane transport (GO:0055085);;	--	--	--	OPT oligopeptide transporter protein;; ATPase family associated with various cellular activities (AAA);; Peptidase family M41	Probable metal-nicotianamine transporter YSL7 OS=Arabidopsis thaliana OX=3702 GN=YSL7 PE=2 SV=1	S	Function unknown	PREDICTED: probable metal-nicotianamine transporter YSL7 isoform X1 [Daucus carota subsp. sativus]
c73357.graph_c0	2152	1118	1933	644	806	756	196.36	105.7	200.45	71.36	83.84	76.16	1.4945e-05	-1.2748	down	--	--	--	--	--	--	C2 domain	Protein SRC2 OS=Glycine max OX=3847 GN=SRC2 PE=2 SV=1	S	Function unknown	PREDICTED: protein SRC2-like [Daucus carota subsp. sativus]
c85243.graph_c0	771	871	587	259	108	221	31.63	38.47	27.66	12.54	4.83	9.66	7.12971e-05	-1.85719	down	[I]	Lipid transport and metabolism	Biological Process: lipid metabolic process (GO:0006629);; Molecular Function: hydrolase activity (GO:0016787);;	--	[I]	Lipid transport and metabolism	Lipase (class 3)	Phospholipase A1-IIdelta OS=Arabidopsis thaliana OX=3702 GN=At2g42690 PE=1 SV=1	S	Function unknown	PREDICTED: phospholipase A1-IIdelta isoform X1 [Daucus carota subsp. sativus]
c89704.graph_c0	205	481	281	78	33	68	5.18	13.09	8.15	2.32	0.93	1.83	4.20244e-05	-2.28404	down	--	--	--	--	--	--	Remorin, C-terminal region	Remorin 4.1 OS=Oryza sativa subsp. japonica OX=39947 GN=REM4.1 PE=1 SV=1	S	Function unknown	PREDICTED: uncharacterized protein At3g61260 [Daucus carota subsp. sativus]
c90784.graph_c0	1418	2861	1919	795	618	654	27.84	64.29	43.84	22.48	14.65	17.25	9.99937e-05	-1.60892	down	--	--	Molecular Function: ATP binding (GO:0005524);; Cellular Component: kinesin complex (GO:0005871);; Biological Process: microtubule-based movement (GO:0007018);; Molecular Function: microtubule binding (GO:0008017);; Molecular Function: ATP-dependent microtubule motor activity, plus-end-directed (GO:0008574);; Biological Process: cellulose microfibril organization (GO:0010215);; Cellular Component:…	K10395|0|vvi:100255840|K10395 kinesin family member 4/21/27 | (RefSeq) kinesin-like protein KIN-4A	[Z]	Cytoskeleton	Kinesin motor domain;; Microtubule binding	Kinesin-like protein KIN-4A OS=Gossypium hirsutum OX=3635 GN=KIN4A PE=2 SV=1	Z	Cytoskeleton	PREDICTED: kinesin-like protein KIN-4A [Daucus carota subsp. sativus]
c72696.graph_c0	65	42	37	196	207	157	6.52	4.64	4.27	23.37	22.99	16.96	4.70809e-06	1.79417	up	--	--	--	--	--	--	--	--	S	Function unknown	hypothetical protein DCAR_009316 [Daucus carota subsp. sativus]
c84945.graph_c0	779	450	1123	3397	11230	7202	24.09	14.44	60.46	315.4	1107.01	659.84	3.25976e-11	2.90002	up	[T]	Signal transduction mechanisms	Molecular Function: protein kinase activity (GO:0004672);; Molecular Function: ATP binding (GO:0005524);; Biological Process: protein phosphorylation (GO:0006468);;	K14500|0|vvi:100265782|K14500 BR-signaling kinase [EC:2.7.11.1] | (RefSeq) probable serine/threonine-protein kinase At4g35230	--	--	Protein tyrosine kinase;; Protein kinase domain	Serine/threonine-protein kinase BSK1 OS=Arabidopsis thaliana OX=3702 GN=BSK1 PE=1 SV=1	T	Signal transduction mechanisms	PREDICTED: probable serine/threonine-protein kinase At4g35230 [Daucus carota subsp. sativus]
c84704.graph_c0	212	284	322	122	48	80	4.62	6.65	8.04	3.12	1.14	1.85	0.00233416	-1.63774	down	[V]	Defense mechanisms	Molecular Function: ATP binding (GO:0005524);; Cellular Component: plasma membrane (GO:0005886);; Cellular Component: integral component of membrane (GO:0016021);; Molecular Function: ATPase activity, coupled to transmembrane movement of substances (GO:0042626);; Biological Process: transmembrane transport (GO:0055085);;	--	[Q]	Secondary metabolites biosynthesis, transport and catabolism	ABC-2 type transporter;; ABC transporter	ABC transporter G family member 5 OS=Arabidopsis thaliana OX=3702 GN=ABCG5 PE=2 SV=1	V	Defense mechanisms	PREDICTED: ABC transporter G family member 5 [Daucus carota subsp. sativus]
c83145.graph_c0	92	36	68	152	244	206	7.58	3.19	6.43	14.84	22.14	18.14	0.00159584	1.45962	up	--	--	Molecular Function: protein serine/threonine kinase activity (GO:0004674);; Molecular Function: ATP binding (GO:0005524);; Cellular Component: plasma membrane (GO:0005886);; Biological Process: defense response (GO:0006952);; Cellular Component: plasmodesma (GO:0009506);; Cellular Component: integral component of membrane (GO:0016021);; Biological Process: protein autophosphorylation (GO:0046777)…	--	--	--	--	Cysteine-rich receptor-like protein kinase 2 OS=Arabidopsis thaliana OX=3702 GN=CRK2 PE=2 SV=1	T	Signal transduction mechanisms	PREDICTED: cysteine-rich receptor-like protein kinase 2 [Daucus carota subsp. sativus]
c87754.graph_c0	99	70	98	18	20	12	4.32	2.62	3.94	1.05	0.77	0.42	1.59434e-06	-2.316	down	--	--	Molecular Function: hydrolase activity (GO:0016787);;	--	--	--	--	--	--	--	PREDICTED: probable protein phosphatase 2C 40 [Daucus carota subsp. sativus]
c82620.graph_c0	0	2	0	7	168	54	0	0.09	0	0.35	9.35	2.46	4.63569e-05	3.69738	up	[Q]	Secondary metabolites biosynthesis, transport and catabolism	Biological Process: flavonoid biosynthetic process (GO:0009813);; Molecular Function: naringenin-chalcone synthase activity (GO:0016210);;	K00660|0|sind:105171854|K00660 chalcone synthase [EC:2.3.1.74] | (RefSeq) chalcone synthase	--	--	Chalcone and stilbene synthases, N-terminal domain;; Chalcone and stilbene synthases, C-terminal domain;; 3-Oxoacyl-[acyl-carrier-protein (ACP)] synthase III;; 3-Oxoacyl-[acyl-carrier-protein (ACP)] synthase III C terminal;; FAE1/Type III polyketide synthase-like protein	Chalcone synthase 9 OS=Daucus carota OX=4039 GN=CHS9 PE=2 SV=1	Q	Secondary metabolites biosynthesis, transport and catabolism	PREDICTED: chalcone synthase 1 [Daucus carota subsp. sativus]
c76554.graph_c0	26	9	17	109	653	212	3.17	1.08	2.5	16.55	91.1	28.1	9.90635e-09	3.53112	up	--	--	Cellular Component: plasmodesma (GO:0009506);;	--	--	--	Probable lipid transfer;; Protease inhibitor/seed storage/LTP family	--	U	Intracellular trafficking, secretion, and vesicular transport	PREDICTED: non-specific lipid-transfer protein [Daucus carota subsp. sativus]
c90194.graph_c0	291	302	256	528	838	565	8.42	9.37	9.13	19.14	29.34	18.87	0.000478317	1.04804	up	--	--	--	--	[R]	General function prediction only	Zinc finger C-x8-C-x5-C-x3-H type (and similar)	Zinc finger CCCH domain-containing protein 6 OS=Oryza sativa subsp. japonica OX=39947 GN=Os01g0258700 PE=2 SV=2	S	Function unknown	PREDICTED: zinc finger CCCH domain-containing protein 34-like isoform X1 [Daucus carota subsp. sativus]
c76407.graph_c0	72	46	139	469	504	477	6.88	5.37	15.79	52.3	52.27	47.44	1.09501e-07	2.28193	up	--	--	--	--	--	--	Domain of unknown function (DUF3403)	Receptor-like serine/threonine-protein kinase SD1-7 OS=Arabidopsis thaliana OX=3702 GN=SD17 PE=1 SV=1	T	Signal transduction mechanisms	PREDICTED: G-type lectin S-receptor-like serine/threonine-protein kinase At4g27290 [Daucus carota subsp. sativus]
c85727.graph_c0	123	76	221	337	1086	754	8.07	5.36	16.7	28.25	79.08	54.8	6.57248e-05	2.0807	up	--	--	Biological Process: microtubule-based process (GO:0007017);; Cellular Component: dynein complex (GO:0030286);;	K10418|5.57102e-50|vra:106762157|K10418 dynein light chain LC8-type | (RefSeq) probable dynein light chain	[Z]	Cytoskeleton	Dynein light chain type 1	Dynein 8 kDa light chain, flagellar outer arm OS=Chlamydomonas reinhardtii OX=3055 PE=1 SV=1	S	Function unknown	PREDICTED: probable dynein light chain [Vigna angularis]
c82245.graph_c0	137	128	116	26	10	44	7.17	7.34	7.05	1.62	0.56	2.46	0.00131379	-2.04199	down	[T]	Signal transduction mechanisms	Molecular Function: protein kinase activity (GO:0004672);; Biological Process: protein phosphorylation (GO:0006468);; Biological Process: signal transduction (GO:0007165);;	K20715|1.17144e-65|spen:107004580|K20715 phototropin [EC:2.7.11.1] | (RefSeq) phototropin-1	--	--	PAS domain	Phototropin-1 OS=Arabidopsis thaliana OX=3702 GN=PHOT1 PE=1 SV=1	T	Signal transduction mechanisms	PREDICTED: phototropin-1-like [Daucus carota subsp. sativus]
c84392.graph_c0	85	92	130	189	362	247	5.25	6.13	8.97	13.16	23.84	15.85	0.00431184	1.20817	up	--	--	Cellular Component: mitochondrion (GO:0005739);; Biological Process: regulation of lipid metabolic process (GO:0019216);;	--	[R]	General function prediction only	Optic atrophy 3 protein (OPA3)	--	S	Function unknown	PREDICTED: OPA3-like protein [Daucus carota subsp. sativus]
c85072.graph_c0	28	65	34	1	5	2	1.33	2.99	1.85	0.04	0.2	0.09	5.6961e-05	-3.17524	down	--	--	--	K13065|8.90611e-111|sind:105166350|K13065 shikimate O-hydroxycinnamoyltransferase [EC:2.3.1.133] | (RefSeq) vinorine synthase-like	--	--	Transferase family;; Transferase family	Vinorine synthase OS=Rauvolfia serpentina OX=4060 GN=ACT PE=1 SV=2	--	--	PREDICTED: vinorine synthase-like [Daucus carota subsp. sativus]
c78953.graph_c0	2	3	16	69	296	117	0.1	0.16	0.91	4.01	15.89	6.18	1.57695e-06	3.49872	up	[L]	Replication, recombination and repair	--	K01246|4.48746e-107|nnu:104595760|K01246 DNA-3-methyladenine glycosylase I [EC:3.2.2.20] | (RefSeq) DNA-3-methyladenine glycosylase 1	--	--	Methyladenine glycosylase;; Methyladenine glycosylase	--	L	Replication, recombination and repair	PREDICTED: DNA-3-methyladenine glycosylase 1 [Daucus carota subsp. sativus]
c89904.graph_c0	587	859	568	338	422	304	17.79	27.82	19.98	12.87	13.31	9.54	0.00955655	-1.00304	down	[F]	Nucleotide transport and metabolism	Molecular Function: magnesium ion binding (GO:0000287);; Molecular Function: adenylosuccinate synthase activity (GO:0004019);; Molecular Function: GTP binding (GO:0005525);; Cellular Component: chloroplast (GO:0009507);; Biological Process: 'de novo' AMP biosynthetic process (GO:0044208);;	K01939|0|egr:104445343|K01939 adenylosuccinate synthase [EC:6.3.4.4] | (RefSeq) adenylosuccinate synthetase 2, chloroplastic	[F]	Nucleotide transport and metabolism	Adenylosuccinate synthetase	Adenylosuccinate synthetase 2, chloroplastic OS=Ricinus communis OX=3988 GN=PURA2 PE=3 SV=1	F	Nucleotide transport and metabolism	PREDICTED: adenylosuccinate synthetase 2, chloroplastic [Daucus carota subsp. sativus]
[truncated: 1,061 more rows]

## Sheet: DEGs in V11E0135
		DEGs in V11E0135
#ID	L01-1_Count	L01-2_Count	L01-3_Count	L02-1_Count	L02-2_Count	L02-3_Count	L01-1_FPKM	L01-2_FPKM	L01-3_FPKM	L02-1_FPKM	L02-2_FPKM	L02-3_FPKM	FDR	log2FC	regulated	COG_class	COG_class_annotation	GO_annotation	KEGG_annotation	KOG_class	KOG_class_annotation	Pfam_annotation	Swissprot_annotation	eggNOG_class	eggNOG_class_annotation	nr_annotation
[truncated: 1,482 more rows]
