# Supplementary material for: Investigation of an Antioxidative System for Salinity Tolerance in Oenanthe javanica
Source: Antioxidants (Basel). 2020 Oct 1;9(10):940. doi: 10.3390/antiox9100940 (PMC7601823; doi:10.3390/antiox9100940)
Supplement: Supplementary file 1 [file antioxidants-09-00940-s001.zip › Supplementary table 4 DEGs annotations.xlsx]

## Sheet: Sheet1
	DEGs Annotations
Databases	V11E0135 control vs treated	V11E0022 control vs treated
COG	546	669
GO	867	1127
KEGG	598	634
KOG	794	832
Pfam	1194	1350
Swiss-Prot	1091	1370
eggNOG	1397	1689
nr	1409	1773
Total annotated	1482	1777
