# Supplementary material for: Investigation of an Antioxidative System for Salinity Tolerance in Oenanthe javanica
Source: Antioxidants (Basel). 2020 Oct 1;9(10):940. doi: 10.3390/antiox9100940 (PMC7601823; doi:10.3390/antiox9100940)
Supplement: Supplementary file 1 [file antioxidants-09-00940-s001.zip › Supplementary table 5 upregulated GO enrichment of DEGs, and GO biological process.xlsx]

## Sheet: Top 20 upregulated GO B.P
List o enriched biological processes in GO analysis, which possess higher number of upregulated DEGs in V11E0022 in comparison to V11E0135
		V1E0022	V11E0135
Biological Process		DEG# 297	DEG# 283
Oxidation-reduction process	GO:0055114	41	20
Regulation of transcription, DNA-templated	GO:0006355	18	9
Protein phosphorylation	GO:0006468	17	11
Metabolic process	GO:0008152	11	7
Carbohydrate metabolic process	GO:0005975	10	5
Lipid metabolic process	GO:0006629	9	1
Proteolysis	GO:0006508	7	3
Hydrogen ion transmembrane transport	GO:1902600	7	5
Response to salt stress	GO:0009651	6	4
Regulation of pH	GO:0006885	5	3
Sodium ion transmembrane transport	GO:0035725	5	2
Transport	GO:0006810	5	3
Potassium ion homeostasis	GO:0055075	5	2
Response to stress	GO:0006950	4	3
Glycolytic process	GO:0006096	4	1
Flavonoid biosynthetic process	GO:0009813	3	0
Carbohydrate transport	GO:0008643	3	2
Defense response	GO:0006952	3	0
Signal transduction	GO:0007165	3	1
Secondary metabolite biosynthetic process	GO:0044550	2	0

## Sheet: upregluated DEG of V11E0022
#! Input file to measure the differentially expressed gene(DEG)-enrichment in annotation Biological Process GO terms by the right sided Fisher exact test.
## Term: GO term name and id, format like 'Biological Process: TERM NAME (TERM ID);'.
## mNum: DEG number in specified annotation Biological Process GO term.
## nNum: Unigene number in specified annotation Biological Process GO term.
## MNum: DEG number in all annotation Biological Process GO term.
## NNum: Unigene number in all annotation Biological Process GO term.
## GIDs: DEG IDs in specified annotation Biological Process GO term, separated by ';'.
#Term	mNum	nNum	MNum	NNum	GIDs
Biological Process: oxidation-reduction process (GO:0055114);	41	1792	297	15939	c86446.graph_c0;c84543.graph_c1;c38371.graph_c0;c74534.graph_c0;c77909.graph_c0;c88910.graph_c0;c88047.graph_c0;c70041.graph_c0;c89115.graph_c0;c91510.graph_c1;c71688.graph_c0;c82821.graph_c0;c87219.graph_c0;c85818.graph_c2;c89791.graph_c0;c85707.graph_c0;c80164.graph_c0;c83948.graph_c0;c91105.graph_c1;c75565.graph_c0;c82468.graph_c0;c86042.graph_c0;c83977.graph_c0;c64191.graph_c0;c84771.graph_c0…
Biological Process: regulation of transcription, DNA-templated (GO:0006355);	18	626	297	15939	c87915.graph_c0;c91516.graph_c0;c90636.graph_c0;c76820.graph_c1;c86802.graph_c0;c78286.graph_c3;c91253.graph_c1;c85114.graph_c0;c92491.graph_c2;c90285.graph_c1;c76355.graph_c0;c89046.graph_c0;c83804.graph_c0;c91703.graph_c1;c88890.graph_c1;c83372.graph_c0;c79379.graph_c0;c82745.graph_c0
Biological Process: protein phosphorylation (GO:0006468);	17	772	297	15939	c85606.graph_c1;c84945.graph_c0;c87973.graph_c0;c84828.graph_c1;c86316.graph_c0;c79581.graph_c0;c92702.graph_c1;c89927.graph_c2;c73214.graph_c0;c76536.graph_c0;c87798.graph_c0;c91426.graph_c1;c74895.graph_c0;c92738.graph_c0;c71455.graph_c0;c91009.graph_c1;c85598.graph_c0
Biological Process: transmembrane transport (GO:0055085);	12	506	297	15939	c76843.graph_c0;c84373.graph_c0;c87806.graph_c0;c88095.graph_c0;c93102.graph_c0;c74024.graph_c0;c89592.graph_c0;c84604.graph_c0;c92105.graph_c0;c91224.graph_c0;c82244.graph_c0;c88144.graph_c0
Biological Process: metabolic process (GO:0008152);	11	398	297	15939	c82782.graph_c0;c79805.graph_c0;c84372.graph_c0;c87715.graph_c0;c78641.graph_c1;c87803.graph_c0;c88437.graph_c0;c84003.graph_c0;c91225.graph_c0;c82906.graph_c0;c87962.graph_c0
Biological Process: carbohydrate metabolic process (GO:0005975);	10	397	297	15939	c80407.graph_c0;c90120.graph_c0;c66311.graph_c0;c84366.graph_c0;c85164.graph_c0;c92240.graph_c0;c76915.graph_c0;c62774.graph_c0;c64191.graph_c0;c83576.graph_c0
Biological Process: lipid metabolic process (GO:0006629);	9	121	297	15939	c92298.graph_c1;c93131.graph_c0;c82646.graph_c0;c86738.graph_c1;c87467.graph_c0;c77165.graph_c0;c70041.graph_c0;c87574.graph_c0;c88483.graph_c0
Biological Process: proteolysis (GO:0006508);	7	412	297	15939	c72670.graph_c0;c87467.graph_c0;c45076.graph_c0;c91013.graph_c1;c86738.graph_c1;c84692.graph_c2;c91013.graph_c0
Biological Process: protein folding (GO:0006457);	7	247	297	15939	c87306.graph_c0;c78210.graph_c0;c83765.graph_c0;c89547.graph_c0;c83765.graph_c1;c74392.graph_c0;c45227.graph_c0
Biological Process: hydrogen ion transmembrane transport (GO:1902600);	7	113	297	15939	c79621.graph_c0;c79621.graph_c1;c91737.graph_c0;c78520.graph_c0;c73002.graph_c0;c83761.graph_c2;c87897.graph_c0
Biological Process: response to salt stress (GO:0009651);	6	65	297	15939	c83761.graph_c2;c93102.graph_c0;c79621.graph_c0;c91737.graph_c0;c79621.graph_c1;c73002.graph_c0
Biological Process: phosphorylation (GO:0016310);	6	369	297	15939	c90776.graph_c0;c89681.graph_c1;c90144.graph_c0;c80589.graph_c0;c80048.graph_c0;c92846.graph_c1
Biological Process: intracellular signal transduction (GO:0035556);	5	99	297	15939	c85649.graph_c0;c85598.graph_c0;c81956.graph_c0;c72044.graph_c0;c85844.graph_c0
Biological Process: protein dephosphorylation (GO:0006470);	5	150	297	15939	c91519.graph_c0;c80307.graph_c1;c80622.graph_c0;c83206.graph_c0;c83944.graph_c0
Biological Process: regulation of pH (GO:0006885);	5	19	297	15939	c79621.graph_c1;c91737.graph_c0;c79621.graph_c0;c83761.graph_c2;c73002.graph_c0
Biological Process: protein autophosphorylation (GO:0046777);	5	49	297	15939	c85844.graph_c0;c85649.graph_c0;c91756.graph_c0;c83145.graph_c0;c88926.graph_c0
Biological Process: sodium ion transmembrane transport (GO:0035725);	5	21	297	15939	c91737.graph_c0;c79621.graph_c1;c73002.graph_c0;c79621.graph_c0;c83761.graph_c2
Biological Process: transport (GO:0006810);	5	316	297	15939	c92326.graph_c1;c43653.graph_c0;c86435.graph_c0;c87161.graph_c0;c74457.graph_c0
Biological Process: potassium ion homeostasis (GO:0055075);	5	9	297	15939	c79621.graph_c0;c83761.graph_c2;c79621.graph_c1;c91737.graph_c0;c73002.graph_c0
Biological Process: glycolytic process (GO:0006096);	4	98	297	15939	c78535.graph_c0;c81985.graph_c0;c85818.graph_c2;c82835.graph_c0
Biological Process: amino acid transmembrane transport (GO:0003333);	4	66	297	15939	c91838.graph_c0;c88660.graph_c1;c85749.graph_c0;c72553.graph_c0
Biological Process: peptidyl-serine phosphorylation (GO:0018105);	4	54	297	15939	c85649.graph_c0;c85844.graph_c0;c85678.graph_c0;c72044.graph_c0
Biological Process: malate metabolic process (GO:0006108);	4	50	297	15939	c80164.graph_c0;c80164.graph_c1;c62774.graph_c0;c64191.graph_c0
Biological Process: response to stress (GO:0006950);	4	90	297	15939	c89547.graph_c0;c89733.graph_c0;c87306.graph_c0;c74392.graph_c0
Biological Process: ribosome biogenesis (GO:0042254);	3	72	297	15939	c86073.graph_c0;c89666.graph_c1;c83587.graph_c0
Biological Process: translation (GO:0006412);	3	734	297	15939	c85102.graph_c1;c86073.graph_c0;c85005.graph_c0
Biological Process: flavonoid biosynthetic process (GO:0009813);	3	55	297	15939	c67471.graph_c0;c82620.graph_c0;c71277.graph_c0
Biological Process: defense response (GO:0006952);	3	100	297	15939	c87798.graph_c0;c73637.graph_c1;c83145.graph_c0
Biological Process: signal transduction (GO:0007165);	3	126	297	15939	c86718.graph_c0;c92702.graph_c1;c87973.graph_c0
Biological Process: ubiquitin-dependent protein catabolic process (GO:0006511);	3	130	297	15939	c92575.graph_c0;c83642.graph_c0;c78824.graph_c0
Biological Process: protein processing (GO:0016485);	3	33	297	15939	c80574.graph_c0;c92927.graph_c0;c81580.graph_c0
Biological Process: carbohydrate transport (GO:0008643);	3	46	297	15939	c80996.graph_c0;c80230.graph_c0;c84604.graph_c0
Biological Process: nucleosome assembly (GO:0006334);	2	35	297	15939	c91149.graph_c0;c79703.graph_c0
Biological Process: photosynthesis (GO:0015979);	2	93	297	15939	c65904.graph_c0;c77946.graph_c1
Biological Process: phospholipid translocation (GO:0045332);	2	27	297	15939	c92582.graph_c1;c77291.graph_c0
Biological Process: negative regulation of endopeptidase activity (GO:0010951);	2	14	297	15939	c83744.graph_c1;c56454.graph_c0
Biological Process: proteasome-mediated ubiquitin-dependent protein catabolic process (GO:0043161);	2	93	297	15939	c88372.graph_c0;c87875.graph_c0
Biological Process: response to karrikin (GO:0080167);	2	8	297	15939	c72044.graph_c0;c72799.graph_c0
Biological Process: acetate metabolic process (GO:0006083);	2	4	297	15939	c93045.graph_c1;c78086.graph_c0
Biological Process: methylation (GO:0032259);	2	228	297	15939	c82538.graph_c0;c81575.graph_c0
Biological Process: glyoxylate cycle (GO:0006097);	2	15	297	15939	c93045.graph_c1;c78086.graph_c0
Biological Process: cellular transition metal ion homeostasis (GO:0046916);	2	37	297	15939	c69714.graph_c0;c77233.graph_c0
Biological Process: protein peptidyl-prolyl isomerization (GO:0000413);	2	82	297	15939	c78210.graph_c0;c45227.graph_c0
Biological Process: pollen germination (GO:0009846);	2	18	297	15939	c85106.graph_c0;c88394.graph_c0
Biological Process: abscisic acid-activated signaling pathway (GO:0009738);	2	48	297	15939	c85649.graph_c0;c85844.graph_c0
Biological Process: cellular amino acid metabolic process (GO:0006520);	2	33	297	15939	c78726.graph_c0;c81295.graph_c1
Biological Process: L-serine biosynthetic process (GO:0006564);	2	14	297	15939	c89791.graph_c0;c91510.graph_c1
Biological Process: isoprenoid biosynthetic process (GO:0008299);	2	27	297	15939	c85707.graph_c0;c77946.graph_c1
Biological Process: protein catabolic process (GO:0030163);	2	56	297	15939	c72670.graph_c0;c87467.graph_c0
Biological Process: lipid catabolic process (GO:0016042);	2	51	297	15939	c81956.graph_c0;c75534.graph_c0
Biological Process: flavonoid glucuronidation (GO:0052696);	2	44	297	15939	c71277.graph_c0;c67471.graph_c0
Biological Process: response to auxin (GO:0009733);	2	51	297	15939	c86095.graph_c0;c93116.graph_c1
Biological Process: protein ubiquitination (GO:0016567);	2	185	297	15939	c92575.graph_c0;c87875.graph_c0
Biological Process: primary metabolic process (GO:0044238);	2	85	297	15939	c92360.graph_c0;c92875.graph_c0
Biological Process: drug transmembrane transport (GO:0006855);	2	57	297	15939	c87563.graph_c0;c81613.graph_c0
Biological Process: regulation of anion transmembrane transport (GO:1903959);	2	19	297	15939	c83928.graph_c0;c78837.graph_c0
Biological Process: translational elongation (GO:0006414);	2	85	297	15939	c82991.graph_c1;c77784.graph_c0
Biological Process: cellular macromolecule metabolic process (GO:0044260);	2	56	297	15939	c92360.graph_c0;c92875.graph_c0
Biological Process: response to oxidative stress (GO:0006979);	2	118	297	15939	c82468.graph_c0;c72044.graph_c0
Biological Process: secondary metabolite biosynthetic process (GO:0044550);	2	49	297	15939	c72369.graph_c0;c80847.graph_c0
Biological Process: transcription, DNA-templated (GO:0006351);	2	211	297	15939	c86143.graph_c0;c65475.graph_c0
Biological Process: response to cytokinin (GO:0009735);	2	65	297	15939	c81985.graph_c0;c83765.graph_c0
Biological Process: dephosphorylation (GO:0016311);	2	129	297	15939	c91616.graph_c0;c88394.graph_c0
Biological Process: butyrate metabolic process (GO:0019605);	2	3	297	15939	c78086.graph_c0;c93045.graph_c1
Biological Process: lipid storage (GO:0019915);	2	12	297	15939	c84244.graph_c0;c74444.graph_c0
Biological Process: response to light stimulus (GO:0009416);	1	47	297	15939	c83948.graph_c0
Biological Process: protein transport (GO:0015031);	1	95	297	15939	c77050.graph_c0
Biological Process: cell division (GO:0051301);	1	69	297	15939	c89129.graph_c0
Biological Process: GMP biosynthetic process (GO:0006177);	1	6	297	15939	c86446.graph_c0
Biological Process: glucose import (GO:0046323);	1	23	297	15939	c89615.graph_c2
Biological Process: ADP transport (GO:0015866);	1	3	297	15939	c88829.graph_c0
Biological Process: RNA phosphodiester bond hydrolysis (GO:0090501);	1	14	297	15939	c87262.graph_c0
Biological Process: regulation of gene expression (GO:0010468);	1	30	297	15939	c91600.graph_c0
Biological Process: endoplasmic reticulum unfolded protein response (GO:0030968);	1	12	297	15939	c86067.graph_c0
Biological Process: membrane fusion (GO:0061025);	1	10	297	15939	c88372.graph_c0
Biological Process: adenine import across plasma membrane (GO:0098702);	1	2	297	15939	c86347.graph_c0
Biological Process: sulfate transmembrane transport (GO:1902358);	1	14	297	15939	c91309.graph_c0
Biological Process: RNA polyadenylation (GO:0043631);	1	5	297	15939	c88172.graph_c1
Biological Process: regulation of fatty acid beta-oxidation (GO:0031998);	1	1	297	15939	c62774.graph_c0
Biological Process: single-organism process (GO:0044699);	1	103	297	15939	c91600.graph_c0
Biological Process: nitrogen compound transport (GO:0071705);	1	5	297	15939	c84173.graph_c0
Biological Process: meristem development (GO:0048507);	1	9	297	15939	c92360.graph_c0
Biological Process: translational termination (GO:0006415);	1	13	297	15939	c73439.graph_c0
Biological Process: ATP biosynthetic process (GO:0006754);	1	22	297	15939	c78520.graph_c0
Biological Process: starch biosynthetic process (GO:0019252);	1	27	297	15939	c89725.graph_c0
Biological Process: metal ion transport (GO:0030001);	1	68	297	15939	c77233.graph_c0
Biological Process: N-glycan fucosylation (GO:0036071);	1	1	297	15939	c88377.graph_c0
Biological Process: pollen development (GO:0009555);	1	42	297	15939	c85106.graph_c0
Biological Process: regulation of intracellular pH (GO:0051453);	1	13	297	15939	c78520.graph_c0
Biological Process: sexual reproduction (GO:0019953);	1	11	297	15939	c84244.graph_c0
Biological Process: anatomical structure morphogenesis (GO:0009653);	1	4	297	15939	c92360.graph_c0
Biological Process: protein kinase C-activating G-protein coupled receptor signaling pathway (GO:0007205);	1	11	297	15939	c89681.graph_c1
Biological Process: proline catabolic process (GO:0006562);	1	3	297	15939	c88047.graph_c0
Biological Process: inositol catabolic process (GO:0019310);	1	8	297	15939	c38371.graph_c0
Biological Process: anther development (GO:0048653);	1	5	297	15939	c71309.graph_c0
Biological Process: single-organism developmental process (GO:0044767);	1	13	297	15939	c92360.graph_c0
Biological Process: cellular oxidant detoxification (GO:0098869);	1	147	297	15939	c82468.graph_c0
Biological Process: cell differentiation (GO:0030154);	1	26	297	15939	c91253.graph_c1
Biological Process: seed oilbody biogenesis (GO:0010344);	1	2	297	15939	c74444.graph_c0
Biological Process: carbohydrate transmembrane transport (GO:0034219);	1	10	297	15939	c80305.graph_c0
Biological Process: pollen tube growth (GO:0009860);	1	11	297	15939	c85106.graph_c0
Biological Process: glycogen catabolic process (GO:0005980);	1	5	297	15939	c89588.graph_c0
Biological Process: peptidyl-threonine phosphorylation (GO:0018107);	1	3	297	15939	c72044.graph_c0
Biological Process: nuclear-transcribed mRNA catabolic process, exonucleolytic, 3'-5' (GO:0034427);	1	7	297	15939	c85847.graph_c0
Biological Process: multicellular organism development (GO:0007275);	1	49	297	15939	c76355.graph_c0
Biological Process: regulation of cellular process (GO:0050794);	1	62	297	15939	c91600.graph_c0
Biological Process: organic substance biosynthetic process (GO:1901576);	1	7	297	15939	c92575.graph_c0
Biological Process: cation transmembrane transport (GO:0098655);	1	36	297	15939	c86347.graph_c0
Biological Process: glycolytic process through fructose-6-phosphate (GO:0061615);	1	19	297	15939	c85180.graph_c0
Biological Process: manganese ion transmembrane transport (GO:0071421);	1	7	297	15939	c82286.graph_c0
Biological Process: protein depalmitoylation (GO:0002084);	1	3	297	15939	c83540.graph_c0
Biological Process: regulation of cell shape (GO:0008360);	1	23	297	15939	c85678.graph_c0
Biological Process: activation of GTPase activity (GO:0090630);	1	13	297	15939	c85259.graph_c0
Biological Process: positive regulation of cellular process (GO:0048522);	1	10	297	15939	c92575.graph_c0
Biological Process: DNA duplex unwinding (GO:0032508);	1	38	297	15939	c85353.graph_c1
Biological Process: cell redox homeostasis (GO:0045454);	1	147	297	15939	c87916.graph_c1
Biological Process: proteasome regulatory particle assembly (GO:0070682);	1	6	297	15939	c82380.graph_c1
Biological Process: polyadenylation-dependent snoRNA 3'-end processing (GO:0071051);	1	5	297	15939	c85847.graph_c0
Biological Process: vitamin E biosynthetic process (GO:0010189);	1	3	297	15939	c78726.graph_c0
Biological Process: glycolipid transport (GO:0046836);	1	7	297	15939	c86741.graph_c0
Biological Process: RNA phosphodiester bond hydrolysis, endonucleolytic (GO:0090502);	1	34	297	15939	c78916.graph_c0
Biological Process: aromatic amino acid family biosynthetic process (GO:0009073);	1	20	297	15939	c92438.graph_c0
Biological Process: regulation of transport (GO:0051049);	1	3	297	15939	c92575.graph_c0
Biological Process: histone H3-K36 demethylation (GO:0070544);	1	2	297	15939	c90636.graph_c0
Biological Process: cellular glucose homeostasis (GO:0001678);	1	10	297	15939	c82835.graph_c0
Biological Process: tricarboxylic acid cycle (GO:0006099);	1	94	297	15939	c62774.graph_c0
Biological Process: MAPK cascade (GO:0000165);	1	33	297	15939	c92605.graph_c1
Biological Process: abscisic acid-activated signaling pathway involved in stomatal movement (GO:1901527);	1	2	297	15939	c93102.graph_c0
Biological Process: sulfate assimilation (GO:0000103);	1	33	297	15939	c88737.graph_c0
Biological Process: NLS-bearing protein import into nucleus (GO:0006607);	1	14	297	15939	c92403.graph_c0
Biological Process: pectin catabolic process (GO:0045490);	1	49	297	15939	c89917.graph_c0
Biological Process: endocytosis (GO:0006897);	1	50	297	15939	c85678.graph_c0
Biological Process: phenylpropanoid biosynthetic process (GO:0009699);	1	8	297	15939	c79091.graph_c0
Biological Process: auxin polar transport (GO:0009926);	1	17	297	15939	c93116.graph_c1
Biological Process: unsaturated fatty acid biosynthetic process (GO:0006636);	1	9	297	15939	c72355.graph_c0
Biological Process: proteolysis involved in cellular protein catabolic process (GO:0051603);	1	58	297	15939	c88930.graph_c0
Biological Process: regulation of lipid metabolic process (GO:0019216);	1	1	297	15939	c84392.graph_c0
Biological Process: cell wall modification (GO:0042545);	1	33	297	15939	c89917.graph_c0
Biological Process: regulation of macromolecule metabolic process (GO:0060255);	1	11	297	15939	c92575.graph_c0
Biological Process: potassium ion transmembrane transport (GO:0071805);	1	45	297	15939	c88438.graph_c0
Biological Process: sphingolipid catabolic process (GO:0030149);	1	1	297	15939	c90266.graph_c1
Biological Process: protein N-linked glycosylation (GO:0006487);	1	27	297	15939	c88377.graph_c0
Biological Process: cellular process (GO:0009987);	1	221	297	15939	c76177.graph_c1
Biological Process: copper ion transport (GO:0006825);	1	3	297	15939	c67884.graph_c0
Biological Process: phosphate-containing compound metabolic process (GO:0006796);	1	31	297	15939	c67589.graph_c1
Biological Process: obsolete protein import into nucleus, docking (GO:0000059);	1	11	297	15939	c92403.graph_c0
Biological Process: response to absence of light (GO:0009646);	1	3	297	15939	c85806.graph_c1
Biological Process: response to ethylene (GO:0009723);	1	18	297	15939	c86095.graph_c0
Biological Process: floral organ abscission (GO:0010227);	1	5	297	15939	c85259.graph_c0
Biological Process: membrane protein proteolysis (GO:0033619);	1	8	297	15939	c91744.graph_c0
Biological Process: raffinose catabolic process (GO:0034484);	1	1	297	15939	c72044.graph_c0
Biological Process: small GTPase mediated signal transduction (GO:0007264);	1	136	297	15939	c79046.graph_c0
Biological Process: lignin biosynthetic process (GO:0009809);	1	21	297	15939	c86889.graph_c0
Biological Process: N-methylnicotinate transport (GO:2001143);	1	1	297	15939	c89592.graph_c0
Biological Process: intracellular protein transport (GO:0006886);	1	199	297	15939	c79517.graph_c0
Biological Process: zinc II ion transmembrane transport (GO:0071577);	1	18	297	15939	c89720.graph_c0
Biological Process: glycogen biosynthetic process (GO:0005978);	1	25	297	15939	c89725.graph_c0
Biological Process: protein refolding (GO:0042026);	1	24	297	15939	c76498.graph_c0
Biological Process: deoxyribonucleoside monophosphate biosynthetic process (GO:0009157);	1	5	297	15939	c87083.graph_c0
Biological Process: response to fungus (GO:0009620);	1	8	297	15939	c93116.graph_c1
Biological Process: cutin biosynthetic process (GO:0010143);	1	13	297	15939	c91616.graph_c0
Biological Process: ribosomal protein import into nucleus (GO:0006610);	1	8	297	15939	c92403.graph_c0
Biological Process: response to manganese ion (GO:0010042);	1	1	297	15939	c82286.graph_c0
Biological Process: uracil import across plasma membrane (GO:0098721);	1	2	297	15939	c86347.graph_c0
Biological Process: polysaccharide catabolic process (GO:0000272);	1	13	297	15939	c86892.graph_c0
Biological Process: tRNA-type intron splice site recognition and cleavage (GO:0000379);	1	2	297	15939	c81796.graph_c0
Biological Process: single-organism cellular process (GO:0044763);	1	88	297	15939	c92575.graph_c0
Biological Process: cleavage in ITS2 between 5.8S rRNA and LSU-rRNA of tricistronic rRNA transcript (SSU-rRNA, 5.8S rRNA, LSU-rRNA) (GO:0000448);	1	1	297	15939	c80048.graph_c0
Biological Process: cellular component organization (GO:0016043);	1	33	297	15939	c92575.graph_c0
Biological Process: embryo development ending in seed dormancy (GO:0009793);	1	94	297	15939	c86042.graph_c0
Biological Process: regulation of primary metabolic process (GO:0080090);	1	13	297	15939	c92575.graph_c0
Biological Process: L-proline biosynthetic process (GO:0055129);	1	3	297	15939	c84771.graph_c0
Biological Process: abscisic acid biosynthetic process (GO:0009688);	1	4	297	15939	c88910.graph_c0
Biological Process: L-lysine catabolic process (GO:0019477);	1	1	297	15939	c84570.graph_c0
Biological Process: gametophyte development (GO:0048229);	1	7	297	15939	c92875.graph_c0
Biological Process: glutathione metabolic process (GO:0006749);	1	31	297	15939	c82658.graph_c1
Biological Process: negative regulation of abscisic acid-activated signaling pathway (GO:0009788);	1	15	297	15939	c72044.graph_c0
Biological Process: asparagine biosynthetic process (GO:0006529);	1	8	297	15939	c85806.graph_c1
Biological Process: endosperm development (GO:0009960);	1	7	297	15939	c86042.graph_c0
Biological Process: regulation of cellular biosynthetic process (GO:0031326);	1	6	297	15939	c92575.graph_c0
Biological Process: chorismate biosynthetic process (GO:0009423);	1	12	297	15939	c92438.graph_c0
Biological Process: response to zinc ion (GO:0010043);	1	11	297	15939	c89720.graph_c0
Biological Process: nicotinate transport (GO:2001142);	1	1	297	15939	c89592.graph_c0
Biological Process: response to freezing (GO:0050826);	1	4	297	15939	c74444.graph_c0
Biological Process: hydrogen peroxide catabolic process (GO:0042744);	1	70	297	15939	c82468.graph_c0
Biological Process: spindle assembly (GO:0051225);	1	8	297	15939	c88002.graph_c0
Biological Process: transition metal ion transport (GO:0000041);	1	3	297	15939	c69714.graph_c0
Biological Process: regulation of transcription from RNA polymerase II promoter (GO:0006357);	1	100	297	15939	c76376.graph_c0
Biological Process: response to water deprivation (GO:0009414);	1	49	297	15939	c89588.graph_c0
Biological Process: protein glycosylation (GO:0006486);	1	51	297	15939	c86067.graph_c0
Biological Process: protein homotetramerization (GO:0051289);	1	2	297	15939	c80164.graph_c1
Biological Process: Golgi organization (GO:0007030);	1	19	297	15939	c88372.graph_c0
Biological Process: regulation of circadian rhythm (GO:0042752);	1	6	297	15939	c90636.graph_c0
Biological Process: ion transmembrane transport (GO:0034220);	1	56	297	15939	c72044.graph_c0
Biological Process: microtubule-based process (GO:0007017);	1	48	297	15939	c85727.graph_c0
Biological Process: mitochondrial fission (GO:0000266);	1	6	297	15939	c80278.graph_c0
Biological Process: glucose metabolic process (GO:0006006);	1	36	297	15939	c85818.graph_c2
Biological Process: regulation of photorespiration (GO:0080093);	1	1	297	15939	c62774.graph_c0
Biological Process: glucose transmembrane transport (GO:1904659);	1	18	297	15939	c89615.graph_c2
Biological Process: flavonol biosynthetic process (GO:0051555);	1	4	297	15939	c89115.graph_c0
Biological Process: chloride transport (GO:0006821);	1	12	297	15939	c78837.graph_c0
Biological Process: peptidyl-tyrosine phosphorylation (GO:0018108);	1	42	297	15939	c84056.graph_c0
Biological Process: lateral root formation (GO:0010311);	1	14	297	15939	c93116.graph_c1
Biological Process: nuclear envelope reassembly (GO:0031468);	1	1	297	15939	c88372.graph_c0
Biological Process: mitochondrial electron transport, NADH to ubiquinone (GO:0006120);	1	8	297	15939	c72492.graph_c1
Biological Process: gibberellin catabolic process (GO:0045487);	1	3	297	15939	c83948.graph_c0
Biological Process: signal peptide processing (GO:0006465);	1	23	297	15939	c91744.graph_c0
Biological Process: regulation of protein kinase activity (GO:0045859);	1	19	297	15939	c85768.graph_c0
Biological Process: negative regulation of catalytic activity (GO:0043086);	1	56	297	15939	c89917.graph_c0
Biological Process: vegetative to reproductive phase transition of meristem (GO:0010228);	1	23	297	15939	c92056.graph_c0
Biological Process: carboxylic acid metabolic process (GO:0019752);	1	14	297	15939	c90266.graph_c1
Biological Process: inflorescence morphogenesis (GO:0048281);	1	4	297	15939	c93116.graph_c1
Biological Process: anion transmembrane transport (GO:0098656);	1	10	297	15939	c87963.graph_c0
Biological Process: cellular manganese ion homeostasis (GO:0030026);	1	6	297	15939	c82286.graph_c0
Biological Process: galactose metabolic process (GO:0006012);	1	18	297	15939	c86667.graph_c1
Biological Process: spermidine biosynthetic process (GO:0008295);	1	13	297	15939	c86767.graph_c0
Biological Process: response to stimulus (GO:0050896);	1	49	297	15939	c76448.graph_c0
Biological Process: G-protein coupled receptor signaling pathway (GO:0007186);	1	19	297	15939	c91225.graph_c0
Biological Process: guanine import across plasma membrane (GO:0098710);	1	2	297	15939	c86347.graph_c0
Biological Process: glucose 6-phosphate metabolic process (GO:0051156);	1	6	297	15939	c82835.graph_c0
Biological Process: transcription from RNA polymerase III promoter (GO:0006383);	1	10	297	15939	c87449.graph_c0
Biological Process: coenzyme A transmembrane transport (GO:0035349);	1	2	297	15939	c85102.graph_c1
Biological Process: RNA secondary structure unwinding (GO:0010501);	1	61	297	15939	c87266.graph_c0
Biological Process: histone H3-K36 methylation (GO:0010452);	1	4	297	15939	c90636.graph_c0
Biological Process: protein import into nucleus, translocation (GO:0000060);	1	8	297	15939	c92403.graph_c0
Biological Process: proton transport (GO:0015992);	1	47	297	15939	c89615.graph_c2
Biological Process: toxin catabolic process (GO:0009407);	1	9	297	15939	c82658.graph_c1
Biological Process: glutamine metabolic process (GO:0006541);	1	27	297	15939	c85806.graph_c1
Biological Process: mRNA processing (GO:0006397);	1	42	297	15939	c92785.graph_c1
Biological Process: floral organ development (GO:0048437);	1	10	297	15939	c87875.graph_c0
Biological Process: floral organ morphogenesis (GO:0048444);	1	3	297	15939	c88437.graph_c0
Biological Process: inositol phosphate metabolic process (GO:0043647);	1	4	297	15939	c80589.graph_c0
Biological Process: positive regulation of gibberellic acid mediated signaling pathway (GO:0009939);	1	1	297	15939	c88437.graph_c0
Biological Process: auxin-activated signaling pathway (GO:0009734);	1	68	297	15939	c92491.graph_c2
Biological Process: recognition of pollen (GO:0048544);	1	24	297	15939	c84828.graph_c1
Biological Process: animal organ development (GO:0048513);	1	5	297	15939	c86718.graph_c0
Biological Process: rRNA catabolic process (GO:0016075);	1	12	297	15939	c85847.graph_c0
Biological Process: DNA integration (GO:0015074);	1	48	297	15939	c83779.graph_c0
Biological Process: RNA 3'-end processing (GO:0031123);	1	6	297	15939	c88172.graph_c1
Biological Process: cellular water homeostasis (GO:0009992);	1	23	297	15939	c72044.graph_c0
Biological Process: hypoxanthine transport (GO:0035344);	1	2	297	15939	c86347.graph_c0
Biological Process: lipid transport (GO:0006869);	1	21	297	15939	c73212.graph_c0
Biological Process: photorespiration (GO:0009853);	1	18	297	15939	c65904.graph_c0
Biological Process: auxin transport (GO:0060918);	1	2	297	15939	c86718.graph_c0
Biological Process: seed germination (GO:0009845);	1	18	297	15939	c88394.graph_c0
Biological Process: uridine catabolic process (GO:0006218);	1	1	297	15939	c81480.graph_c0
Biological Process: response to wounding (GO:0009611);	1	21	297	15939	c56454.graph_c0
Biological Process: carbon fixation (GO:0015977);	1	14	297	15939	c65904.graph_c0
Biological Process: nuclear mRNA surveillance (GO:0071028);	1	5	297	15939	c85847.graph_c0
Biological Process: inorganic cation transmembrane transport (GO:0098662);	1	5	297	15939	c69714.graph_c0
Biological Process: Wnt signaling pathway (GO:0016055);	1	15	297	15939	c85678.graph_c0
Biological Process: negative regulation of peptidase activity (GO:0010466);	1	3	297	15939	c68282.graph_c0
Biological Process: trichome morphogenesis (GO:0010090);	1	10	297	15939	c81985.graph_c0
Biological Process: U4 snRNA 3'-end processing (GO:0034475);	1	5	297	15939	c85847.graph_c0
Biological Process: carbohydrate phosphorylation (GO:0046835);	1	36	297	15939	c82835.graph_c0
Biological Process: biosynthetic process (GO:0009058);	1	69	297	15939	c81295.graph_c1
Biological Process: rRNA 3'-end processing (GO:0031125);	1	4	297	15939	c85847.graph_c0
Biological Process: DNA replication initiation (GO:0006270);	1	17	297	15939	c85353.graph_c1
Biological Process: response to copper ion (GO:0046688);	1	3	297	15939	c82286.graph_c0
Biological Process: cellular response to light stimulus (GO:0071482);	1	4	297	15939	c76236.graph_c0
Biological Process: phosphorelay signal transduction system (GO:0000160);	1	54	297	15939	c88890.graph_c1
Biological Process: regulation of sequestering of zinc ion (GO:0061088);	1	8	297	15939	c89720.graph_c0
Biological Process: regulation of shoot system development (GO:0048831);	1	8	297	15939	c91253.graph_c1
Biological Process: tRNA N2-guanine methylation (GO:0002940);	1	3	297	15939	c91986.graph_c0
Biological Process: branched-chain amino acid metabolic process (GO:0009081);	1	3	297	15939	c87859.graph_c0
Biological Process: peroxisome fission (GO:0016559);	1	9	297	15939	c80278.graph_c0
Biological Process: fructose 6-phosphate metabolic process (GO:0006002);	1	25	297	15939	c85180.graph_c0
Biological Process: biological regulation (GO:0065007);	1	31	297	15939	c74024.graph_c0
Biological Process: photomorphogenesis (GO:0009640);	1	22	297	15939	c93116.graph_c1
Biological Process: cellular potassium ion homeostasis (GO:0030007);	1	5	297	15939	c93102.graph_c0
Biological Process: triglyceride biosynthetic process (GO:0019432);	1	11	297	15939	c89559.graph_c0
Biological Process: amine metabolic process (GO:0009308);	1	10	297	15939	c92961.graph_c1
Biological Process: succinate transmembrane transport (GO:0071422);	1	1	297	15939	c85005.graph_c0
Biological Process: ATP transport (GO:0015867);	1	4	297	15939	c88829.graph_c0
Biological Process: nucleic acid phosphodiester bond hydrolysis (GO:0090305);	1	67	297	15939	c82816.graph_c0
Biological Process: hormone-mediated signaling pathway (GO:0009755);	1	5	297	15939	c86095.graph_c0
Biological Process: plant-type cell wall organization (GO:0009664);	1	38	297	15939	c80533.graph_c1
Biological Process: histone acetylation (GO:0016573);	1	30	297	15939	c91703.graph_c1
Biological Process: spermine biosynthetic process (GO:0006597);	1	10	297	15939	c86767.graph_c0
Biological Process: purine nucleoside catabolic process (GO:0006152);	1	1	297	15939	c81480.graph_c0
Biological Process: iron ion transmembrane transport (GO:0034755);	1	5	297	15939	c78619.graph_c0
Biological Process: S-adenosylmethioninamine biosynthetic process (GO:0006557);	1	9	297	15939	c86767.graph_c0
Biological Process: positive regulation of transcription from RNA polymerase II promoter (GO:0045944);	1	29	297	15939	c82832.graph_c0
Biological Process: unidimensional cell growth (GO:0009826);	1	28	297	15939	c93116.graph_c1
Biological Process: defense response to other organism (GO:0098542);	1	12	297	15939	c72369.graph_c0
Biological Process: cellular metabolic process (GO:0044237);	1	55	297	15939	c91600.graph_c0

## Sheet: upregulated DEG of V11E0135
#! Input file to measure the differentially expressed gene(DEG)-enrichment in annotation Biological Process GO terms by the right sided Fisher exact test.
## Term: GO term name and id, format like 'Biological Process: TERM NAME (TERM ID);'.
## mNum: DEG number in specified annotation Biological Process GO term.
## nNum: Unigene number in specified annotation Biological Process GO term.
## MNum: DEG number in all annotation Biological Process GO term.
## NNum: Unigene number in all annotation Biological Process GO term.
## GIDs: DEG IDs in specified annotation Biological Process GO term, separated by ';'.
#Term	mNum	nNum	MNum	NNum	GIDs
Biological Process: translation (GO:0006412);	26	734	283	15939	c74191.graph_c0;c93269.graph_c0;c55271.graph_c0;c55490.graph_c0;c78132.graph_c0;c45129.graph_c0;c41985.graph_c0;c92641.graph_c3;c70102.graph_c0;c93490.graph_c0;c93391.graph_c0;c39442.graph_c0;c75091.graph_c0;c69277.graph_c0;c38274.graph_c0;c51223.graph_c0;c93249.graph_c0;c38372.graph_c0;c38346.graph_c0;c93324.graph_c0;c93522.graph_c0;c56580.graph_c0;c40200.graph_c0;c40057.graph_c0;c93220.graph_c0…
Biological Process: oxidation-reduction process (GO:0055114);	20	1792	283	15939	c55081.graph_c0;c82840.graph_c0;c79463.graph_c1;c93299.graph_c0;c74270.graph_c0;c68241.graph_c0;c91229.graph_c0;c89821.graph_c0;c83948.graph_c0;c81744.graph_c0;c79700.graph_c0;c84851.graph_c0;c83977.graph_c0;c80164.graph_c1;c81997.graph_c0;c92210.graph_c1;c86127.graph_c0;c89615.graph_c2;c92961.graph_c1;c87793.graph_c0
Biological Process: protein folding (GO:0006457);	16	247	283	15939	c92210.graph_c1;c78210.graph_c0;c43543.graph_c0;c38171.graph_c0;c38175.graph_c0;c53042.graph_c0;c38300.graph_c0;c42947.graph_c1;c83765.graph_c0;c38226.graph_c0;c44068.graph_c0;c81250.graph_c0;c89547.graph_c0;c83765.graph_c1;c75997.graph_c0;c93243.graph_c0
Biological Process: transmembrane transport (GO:0055085);	14	506	283	15939	c87583.graph_c0;c56275.graph_c0;c92641.graph_c3;c87550.graph_c0;c91379.graph_c0;c92169.graph_c0;c38372.graph_c0;c76007.graph_c0;c76969.graph_c0;c92105.graph_c0;c85545.graph_c0;c91224.graph_c0;c44556.graph_c0;c73806.graph_c0
Biological Process: protein phosphorylation (GO:0006468);	11	772	283	15939	c92762.graph_c0;c86316.graph_c0;c68241.graph_c0;c91953.graph_c0;c89514.graph_c0;c90478.graph_c1;c56099.graph_c0;c62586.graph_c0;c74895.graph_c0;c75501.graph_c0;c66372.graph_c0
Biological Process: regulation of transcription, DNA-templated (GO:0006355);	9	626	283	15939	c87915.graph_c0;c91516.graph_c0;c90636.graph_c0;c85964.graph_c0;c76355.graph_c0;c91703.graph_c1;c71950.graph_c0;c79379.graph_c0;c92224.graph_c1
Biological Process: phosphorylation (GO:0016310);	8	369	283	15939	c86572.graph_c1;c73290.graph_c0;c89821.graph_c0;c54616.graph_c0;c54483.graph_c0;c54521.graph_c0;c56131.graph_c0;c88118.graph_c0
Biological Process: ubiquitin-dependent protein catabolic process (GO:0006511);	7	130	283	15939	c61459.graph_c1;c92575.graph_c0;c93315.graph_c0;c76644.graph_c0;c72837.graph_c0;c38434.graph_c0;c78824.graph_c0
Biological Process: metabolic process (GO:0008152);	7	398	283	15939	c93351.graph_c0;c65919.graph_c0;c73808.graph_c0;c93309.graph_c0;c76127.graph_c0;c62849.graph_c0;c87962.graph_c0
Biological Process: tricarboxylic acid cycle (GO:0006099);	6	94	283	15939	c54646.graph_c0;c71780.graph_c0;c38448.graph_c0;c44473.graph_c0;c62596.graph_c0;c46235.graph_c0
Biological Process: cellular process (GO:0009987);	6	221	283	15939	c54633.graph_c0;c42939.graph_c0;c77201.graph_c0;c68395.graph_c0;c70409.graph_c0;c70222.graph_c0
Biological Process: single-organism process (GO:0044699);	5	103	283	15939	c91600.graph_c0;c38780.graph_c0;c66243.graph_c0;c43302.graph_c0;c70409.graph_c0
Biological Process: single-organism cellular process (GO:0044763);	5	88	283	15939	c83439.graph_c0;c92575.graph_c0;c42754.graph_c0;c38348.graph_c0;c44334.graph_c0
Biological Process: intracellular signal transduction (GO:0035556);	5	99	283	15939	c89514.graph_c0;c85767.graph_c0;c81956.graph_c0;c72044.graph_c0;c85844.graph_c0
Biological Process: carbohydrate metabolic process (GO:0005975);	5	397	283	15939	c90120.graph_c0;c85164.graph_c0;c54521.graph_c0;c76915.graph_c0;c88274.graph_c0
Biological Process: translational initiation (GO:0006413);	5	114	283	15939	c71269.graph_c0;c62952.graph_c0;c66529.graph_c0;c63062.graph_c0;c81621.graph_c0
Biological Process: hydrogen ion transmembrane transport (GO:1902600);	5	113	283	15939	c79621.graph_c0;c87235.graph_c1;c79757.graph_c0;c38366.graph_c0;c73002.graph_c0
Biological Process: cytoplasmic translation (GO:0002181);	5	80	283	15939	c44377.graph_c0;c93330.graph_c0;c93228.graph_c0;c44221.graph_c0;c44245.graph_c0
Biological Process: response to water deprivation (GO:0009414);	4	49	283	15939	c89588.graph_c0;c72638.graph_c0;c91730.graph_c0;c85446.graph_c0
Biological Process: regulation of transcription from RNA polymerase II promoter (GO:0006357);	4	100	283	15939	c91267.graph_c0;c90497.graph_c0;c42754.graph_c0;c61427.graph_c1
Biological Process: nucleosome assembly (GO:0006334);	4	35	283	15939	c91149.graph_c0;c77488.graph_c0;c79703.graph_c0;c72123.graph_c0
Biological Process: single-organism metabolic process (GO:0044710);	4	70	283	15939	c83439.graph_c0;c61983.graph_c0;c38348.graph_c0;c64734.graph_c0
Biological Process: protein dephosphorylation (GO:0006470);	4	150	283	15939	c53042.graph_c0;c80307.graph_c1;c80622.graph_c0;c83944.graph_c0
Biological Process: response to salt stress (GO:0009651);	4	65	283	15939	c80751.graph_c1;c79621.graph_c0;c73806.graph_c0;c73002.graph_c0
Biological Process: protein autophosphorylation (GO:0046777);	3	49	283	15939	c85767.graph_c0;c85844.graph_c0;c91756.graph_c0
Biological Process: phosphate-containing compound metabolic process (GO:0006796);	3	31	283	15939	c38150.graph_c0;c67589.graph_c1;c93623.graph_c0
Biological Process: proteolysis (GO:0006508);	3	412	283	15939	c87793.graph_c0;c91042.graph_c0;c80207.graph_c0
Biological Process: cell redox homeostasis (GO:0045454);	3	147	283	15939	c54698.graph_c0;c87916.graph_c1;c92210.graph_c1
Biological Process: response to stress (GO:0006950);	3	90	283	15939	c89547.graph_c0;c38175.graph_c0;c75997.graph_c0
Biological Process: protein peptidyl-prolyl isomerization (GO:0000413);	3	82	283	15939	c89783.graph_c1;c78210.graph_c0;c93256.graph_c0
Biological Process: mRNA splicing, via spliceosome (GO:0000398);	3	96	283	15939	c70102.graph_c0;c79401.graph_c0;c70352.graph_c0
Biological Process: small GTPase mediated signal transduction (GO:0007264);	3	136	283	15939	c38356.graph_c0;c38156.graph_c0;c76524.graph_c0
Biological Process: protein ubiquitination (GO:0016567);	3	185	283	15939	c64947.graph_c0;c92575.graph_c0;c68351.graph_c0
Biological Process: transport (GO:0006810);	3	316	283	15939	c43529.graph_c0;c43653.graph_c0;c62235.graph_c0
Biological Process: regulation of pH (GO:0006885);	3	19	283	15939	c79757.graph_c0;c79621.graph_c0;c73002.graph_c0
Biological Process: peptidyl-serine phosphorylation (GO:0018105);	3	54	283	15939	c85767.graph_c0;c85844.graph_c0;c72044.graph_c0
Biological Process: transcription, DNA-templated (GO:0006351);	3	211	283	15939	c59855.graph_c0;c74807.graph_c0;c85756.graph_c0
Biological Process: RNA metabolic process (GO:0016070);	2	33	283	15939	c91608.graph_c0;c61871.graph_c1
Biological Process: aerobic respiration (GO:0009060);	2	32	283	15939	c38330.graph_c0;c38366.graph_c0
Biological Process: cellular oxidant detoxification (GO:0098869);	2	147	283	15939	c79700.graph_c0;c93299.graph_c0
Biological Process: mRNA processing (GO:0006397);	2	42	283	15939	c61427.graph_c1;c92785.graph_c1
Biological Process: response to abscisic acid (GO:0009737);	2	69	283	15939	c85446.graph_c0;c78805.graph_c0
Biological Process: drug transmembrane transport (GO:0006855);	2	57	283	15939	c87563.graph_c0;c91980.graph_c1
Biological Process: replicative cell aging (GO:0001302);	2	12	283	15939	c43543.graph_c0;c38226.graph_c0
Biological Process: histone acetylation (GO:0016573);	2	30	283	15939	c91703.graph_c1;c61427.graph_c1
Biological Process: cellular amino acid metabolic process (GO:0006520);	2	33	283	15939	c62222.graph_c0;c81295.graph_c1
Biological Process: formation of translation preinitiation complex (GO:0001731);	2	52	283	15939	c64035.graph_c0;c93166.graph_c0
Biological Process: cellular response to oxidative stress (GO:0034599);	2	41	283	15939	c92210.graph_c1;c61427.graph_c1
Biological Process: potassium ion homeostasis (GO:0055075);	2	9	283	15939	c79621.graph_c0;c73002.graph_c0
Biological Process: chaperone-mediated protein folding (GO:0061077);	2	20	283	15939	c89783.graph_c1;c93256.graph_c0
Biological Process: cellular metabolic process (GO:0044237);	2	55	283	15939	c91600.graph_c0;c83439.graph_c0
Biological Process: amine metabolic process (GO:0009308);	2	10	283	15939	c79463.graph_c1;c92961.graph_c1
Biological Process: regulation of translation (GO:0006417);	2	11	283	15939	c69934.graph_c0;c90778.graph_c0
Biological Process: regulation of biological process (GO:0050789);	2	16	283	15939	c70409.graph_c0;c74807.graph_c0
Biological Process: ribosomal large subunit assembly (GO:0000027);	2	56	283	15939	c44377.graph_c0;c55271.graph_c0
Biological Process: intracellular protein transport (GO:0006886);	2	199	283	15939	c62810.graph_c1;c74446.graph_c0
Biological Process: translational elongation (GO:0006414);	2	85	283	15939	c51784.graph_c0;c77784.graph_c0
Biological Process: cellular respiration (GO:0045333);	2	5	283	15939	c44211.graph_c0;c38220.graph_c0
Biological Process: protein processing (GO:0016485);	2	33	283	15939	c80574.graph_c0;c38220.graph_c0
Biological Process: actin cytoskeleton organization (GO:0030036);	2	15	283	15939	c43621.graph_c0;c44195.graph_c0
Biological Process: malate metabolic process (GO:0006108);	2	50	283	15939	c80164.graph_c1;c46235.graph_c0
Biological Process: oxylipin biosynthetic process (GO:0031408);	2	18	283	15939	c91229.graph_c0;c74270.graph_c0
Biological Process: rRNA processing (GO:0006364);	2	80	283	15939	c56158.graph_c0;c86393.graph_c0
Biological Process: response to oxidative stress (GO:0006979);	2	118	283	15939	c79700.graph_c0;c72044.graph_c0
Biological Process: negative regulation of transcription, DNA-templated (GO:0045892);	2	25	283	15939	c78805.graph_c0;c42754.graph_c0
Biological Process: glycogen catabolic process (GO:0005980);	2	5	283	15939	c91730.graph_c0;c89588.graph_c0
Biological Process: mitochondrion inheritance (GO:0000001);	2	8	283	15939	c43543.graph_c0;c38226.graph_c0
Biological Process: abscisic acid-activated signaling pathway (GO:0009738);	2	48	283	15939	c85844.graph_c0;c85767.graph_c0
Biological Process: ion transport (GO:0006811);	2	34	283	15939	c43302.graph_c0;c38780.graph_c0
Biological Process: cellular component organization (GO:0016043);	2	33	283	15939	c44068.graph_c0;c92575.graph_c0
Biological Process: negative regulation of proteolysis (GO:0045861);	2	3	283	15939	c38226.graph_c0;c43543.graph_c0
Biological Process: ribosomal small subunit assembly (GO:0000028);	2	43	283	15939	c44245.graph_c0;c93249.graph_c0
Biological Process: carbohydrate transport (GO:0008643);	2	46	283	15939	c80996.graph_c0;c80230.graph_c0
Biological Process: response to stimulus (GO:0050896);	2	49	283	15939	c76448.graph_c0;c43687.graph_c0
Biological Process: maturation of SSU-rRNA from tricistronic rRNA transcript (SSU-rRNA, 5.8S rRNA, LSU-rRNA) (GO:0000462);	2	66	283	15939	c93391.graph_c0;c70102.graph_c0
Biological Process: glucose import (GO:0046323);	2	23	283	15939	c89615.graph_c2;c76325.graph_c0
Biological Process: glycogen metabolic process (GO:0005977);	2	14	283	15939	c72260.graph_c0;c80751.graph_c1
Biological Process: protein import into nucleus (GO:0006606);	2	29	283	15939	c65003.graph_c0;c38156.graph_c0
Biological Process: sodium ion transmembrane transport (GO:0035725);	2	21	283	15939	c73002.graph_c0;c79621.graph_c0
Biological Process: methylation (GO:0032259);	2	228	283	15939	c91608.graph_c0;c82538.graph_c0
Biological Process: proton transport (GO:0015992);	2	47	283	15939	c89615.graph_c2;c56275.graph_c0
Biological Process: biological regulation (GO:0065007);	2	31	283	15939	c71269.graph_c0;c54633.graph_c0
Biological Process: tRNA processing (GO:0008033);	2	28	283	15939	c93139.graph_c0;c55478.graph_c0
Biological Process: proteasomal protein catabolic process (GO:0010498);	2	10	283	15939	c61459.graph_c1;c76644.graph_c0
Biological Process: protein transport (GO:0015031);	2	95	283	15939	c62719.graph_c0;c86318.graph_c0
Biological Process: auxin-activated signaling pathway (GO:0009734);	2	68	283	15939	c92224.graph_c1;c78805.graph_c0
Biological Process: positive regulation of cell death (GO:0010942);	1	2	283	15939	c80751.graph_c1
Biological Process: SRP-dependent cotranslational protein targeting to membrane, translocation (GO:0006616);	1	8	283	15939	c38171.graph_c0
Biological Process: (1->3)-beta-D-glucan biosynthetic process (GO:0006075);	1	25	283	15939	c90033.graph_c0
Biological Process: proteolysis involved in cellular protein catabolic process (GO:0051603);	1	58	283	15939	c62701.graph_c1
Biological Process: zinc II ion transmembrane transport (GO:0071577);	1	18	283	15939	c89720.graph_c0
Biological Process: nucleotide-excision repair (GO:0006289);	1	28	283	15939	c64947.graph_c0
Biological Process: protein targeting to peroxisome (GO:0006625);	1	2	283	15939	c82375.graph_c1
Biological Process: negative regulation of cell proliferation (GO:0008285);	1	3	283	15939	c78805.graph_c0
Biological Process: recognition of pollen (GO:0048544);	1	24	283	15939	c90478.graph_c1
Biological Process: conjugation with cellular fusion (GO:0000747);	1	3	283	15939	c93256.graph_c0
Biological Process: negative regulation of abscisic acid-activated signaling pathway (GO:0009788);	1	15	283	15939	c72044.graph_c0
Biological Process: cell division (GO:0051301);	1	69	283	15939	c38129.graph_c0
Biological Process: protection from non-homologous end joining at telomere (GO:0031848);	1	3	283	15939	c82126.graph_c0
Biological Process: starch biosynthetic process (GO:0019252);	1	27	283	15939	c89725.graph_c0
Biological Process: hydrogen peroxide catabolic process (GO:0042744);	1	70	283	15939	c79700.graph_c0
Biological Process: positive regulation of flower development (GO:0009911);	1	13	283	15939	c78805.graph_c0
Biological Process: response to osmotic stress (GO:0006970);	1	21	283	15939	c85446.graph_c0
Biological Process: organelle organization (GO:0006996);	1	22	283	15939	c64299.graph_c0
Biological Process: inner mitochondrial membrane organization (GO:0007007);	1	1	283	15939	c43543.graph_c0
Biological Process: isocitrate metabolic process (GO:0006102);	1	11	283	15939	c54646.graph_c0
Biological Process: positive regulation of macromolecule metabolic process (GO:0010604);	1	8	283	15939	c42754.graph_c0
Biological Process: chronological cell aging (GO:0001300);	1	4	283	15939	c61427.graph_c1
Biological Process: regulation of gene expression (GO:0010468);	1	30	283	15939	c91600.graph_c0
Biological Process: endonucleolytic cleavage in ITS1 to separate SSU-rRNA from 5.8S rRNA and LSU-rRNA from tricistronic rRNA transcript (SSU-rRNA, 5.8S rRNA, LSU-rRNA) (GO:0000447);	1	20	283	15939	c61750.graph_c1
Biological Process: regulation of pentose-phosphate shunt (GO:0043456);	1	2	283	15939	c38218.graph_c0
Biological Process: nucleotide biosynthetic process (GO:0009165);	1	7	283	15939	c54616.graph_c0
Biological Process: response to karrikin (GO:0080167);	1	8	283	15939	c72044.graph_c0
Biological Process: ribosome biogenesis (GO:0042254);	1	72	283	15939	c68439.graph_c0
Biological Process: carbohydrate derivative metabolic process (GO:1901135);	1	1	283	15939	c56131.graph_c0
Biological Process: maturation of LSU-rRNA (GO:0000470);	1	21	283	15939	c70102.graph_c0
Biological Process: response to nitrate (GO:0010167);	1	6	283	15939	c80982.graph_c0
Biological Process: cold acclimation (GO:0009631);	1	12	283	15939	c85446.graph_c0
Biological Process: N-glycan fucosylation (GO:0036071);	1	1	283	15939	c88377.graph_c0
Biological Process: regulation of circadian rhythm (GO:0042752);	1	6	283	15939	c90636.graph_c0
Biological Process: photosynthesis (GO:0015979);	1	93	283	15939	c77946.graph_c1
Biological Process: raffinose catabolic process (GO:0034484);	1	1	283	15939	c72044.graph_c0
Biological Process: oxidative phosphorylation (GO:0006119);	1	9	283	15939	c38366.graph_c0
Biological Process: nonfunctional rRNA decay (GO:0070651);	1	5	283	15939	c38434.graph_c0
Biological Process: lipid catabolic process (GO:0016042);	1	51	283	15939	c81956.graph_c0
Biological Process: pollen-pistil interaction (GO:0009875);	1	1	283	15939	c90363.graph_c0
Biological Process: metal ion transport (GO:0030001);	1	68	283	15939	c77233.graph_c0
Biological Process: negative regulation of protein catabolic process (GO:0042177);	1	4	283	15939	c64947.graph_c0
Biological Process: vacuolar acidification (GO:0007035);	1	18	283	15939	c93196.graph_c0
Biological Process: carbon fixation (GO:0015977);	1	14	283	15939	c71780.graph_c0
Biological Process: plant ovule development (GO:0048481);	1	13	283	15939	c78805.graph_c0
Biological Process: pollen tube guidance (GO:0010183);	1	2	283	15939	c90363.graph_c0
Biological Process: cellular transition metal ion homeostasis (GO:0046916);	1	37	283	15939	c77233.graph_c0
Biological Process: primary metabolic process (GO:0044238);	1	85	283	15939	c38159.graph_c0
Biological Process: embryo sac development (GO:0009553);	1	21	283	15939	c90363.graph_c0
Biological Process: nuclear-transcribed mRNA catabolic process, exonucleolytic, 3'-5' (GO:0034427);	1	7	283	15939	c85847.graph_c0
Biological Process: histone glutamine methylation (GO:1990258);	1	4	283	15939	c93139.graph_c0
Biological Process: establishment of cell polarity (GO:0030010);	1	4	283	15939	c61427.graph_c1
Biological Process: defense response to fungus (GO:0050832);	1	39	283	15939	c85446.graph_c0
Biological Process: nitrate transport (GO:0015706);	1	4	283	15939	c80982.graph_c0
Biological Process: negative regulation of catalytic activity (GO:0043086);	1	56	283	15939	c68465.graph_c0
Biological Process: ribosomal subunit export from nucleus (GO:0000054);	1	9	283	15939	c38156.graph_c0
Biological Process: actin filament bundle assembly (GO:0051017);	1	13	283	15939	c55432.graph_c0
Biological Process: double-strand break repair via nonhomologous end joining (GO:0006303);	1	9	283	15939	c82126.graph_c0
Biological Process: cellular biosynthetic process (GO:0044249);	1	8	283	15939	c93623.graph_c0
Biological Process: regulation of macromolecule metabolic process (GO:0060255);	1	11	283	15939	c92575.graph_c0
Biological Process: rRNA catabolic process (GO:0016075);	1	12	283	15939	c85847.graph_c0
Biological Process: box C/D snoRNA 3'-end processing (GO:0000494);	1	4	283	15939	c93139.graph_c0
Biological Process: mitochondrial genome maintenance (GO:0000002);	1	20	283	15939	c62596.graph_c0
Biological Process: cytoplasmic mRNA processing body assembly (GO:0033962);	1	7	283	15939	c69934.graph_c0
Biological Process: fumarate metabolic process (GO:0006106);	1	9	283	15939	c46235.graph_c0
Biological Process: nucleosome organization (GO:0034728);	1	2	283	15939	c42754.graph_c0
Biological Process: regulation of transcription from RNA polymerase I promoter (GO:0006356);	1	3	283	15939	c93139.graph_c0
Biological Process: spliceosomal tri-snRNP complex assembly (GO:0000244);	1	7	283	15939	c38456.graph_c0
Biological Process: protein tetramerization (GO:0051262);	1	8	283	15939	c46235.graph_c0
Biological Process: glycogen biosynthetic process (GO:0005978);	1	25	283	15939	c89725.graph_c0
Biological Process: glyoxylate cycle (GO:0006097);	1	15	283	15939	c79733.graph_c0
Biological Process: RNA phosphodiester bond hydrolysis (GO:0090501);	1	14	283	15939	c87262.graph_c0
Biological Process: endosperm development (GO:0009960);	1	7	283	15939	c72837.graph_c0
Biological Process: regulation of endocytosis (GO:0030100);	1	9	283	15939	c61427.graph_c1
Biological Process: maturation of SSU-rRNA from tricistronic rRNA transcript (SSU-rRNA, LSU-rRNA,5S) (GO:0002109);	1	2	283	15939	c44245.graph_c0
Biological Process: electron transport chain (GO:0022900);	1	33	283	15939	c38366.graph_c0
Biological Process: maturation of 5.8S rRNA from tricistronic rRNA transcript (SSU-rRNA, 5.8S rRNA, LSU-rRNA) (GO:0000466);	1	9	283	15939	c38221.graph_c0
Biological Process: regulation of COPII vesicle coating (GO:0003400);	1	3	283	15939	c74446.graph_c0
Biological Process: fruit dehiscence (GO:0010047);	1	3	283	15939	c78805.graph_c0
Biological Process: cutin transport (GO:0080051);	1	4	283	15939	c73806.graph_c0
Biological Process: heme biosynthetic process (GO:0006783);	1	14	283	15939	c88717.graph_c0
Biological Process: rRNA 3'-end processing (GO:0031125);	1	4	283	15939	c85847.graph_c0
Biological Process: ribonucleoprotein complex assembly (GO:0022618);	1	6	283	15939	c93269.graph_c0
Biological Process: RNA secondary structure unwinding (GO:0010501);	1	61	283	15939	c69934.graph_c0
Biological Process: butyrate metabolic process (GO:0019605);	1	3	283	15939	c79733.graph_c0
Biological Process: biosynthetic process (GO:0009058);	1	69	283	15939	c81295.graph_c1
Biological Process: peptidyl-threonine phosphorylation (GO:0018107);	1	3	283	15939	c72044.graph_c0
Biological Process: organic substance metabolic process (GO:0071704);	1	35	283	15939	c38159.graph_c0
Biological Process: sulfate transmembrane transport (GO:1902358);	1	14	283	15939	c91309.graph_c0
Biological Process: endonucleolytic cleavage to generate mature 3'-end of SSU-rRNA from (SSU-rRNA, 5.8S rRNA, LSU-rRNA) (GO:0000461);	1	9	283	15939	c61750.graph_c1
Biological Process: pollen development (GO:0009555);	1	42	283	15939	c80751.graph_c1
Biological Process: regulation of homoserine biosynthetic process (GO:1901710);	1	3	283	15939	c93256.graph_c0
Biological Process: amino acid transmembrane transport (GO:0003333);	1	66	283	15939	c85749.graph_c0
Biological Process: regulation of histone modification (GO:0031056);	1	1	283	15939	c42754.graph_c0
Biological Process: cellular macromolecular complex assembly (GO:0034622);	1	1	283	15939	c81621.graph_c0
Biological Process: protein targeting to vacuole (GO:0006623);	1	32	283	15939	c80286.graph_c0
Biological Process: proteasome storage granule assembly (GO:1902906);	1	2	283	15939	c93196.graph_c0
Biological Process: gluconeogenesis (GO:0006094);	1	27	283	15939	c38218.graph_c0
Biological Process: histone H3-K36 demethylation (GO:0070544);	1	2	283	15939	c90636.graph_c0
Biological Process: nuclear envelope organization (GO:0006998);	1	5	283	15939	c74446.graph_c0
Biological Process: response to cadmium ion (GO:0046686);	1	44	283	15939	c80751.graph_c1
Biological Process: mitochondrial electron transport, ubiquinol to cytochrome c (GO:0006122);	1	23	283	15939	c93147.graph_c0
Biological Process: regulation of sequestering of zinc ion (GO:0061088);	1	8	283	15939	c89720.graph_c0
Biological Process: heat acclimation (GO:0010286);	1	8	283	15939	c85446.graph_c0
Biological Process: floral organ abscission (GO:0010227);	1	5	283	15939	c78805.graph_c0
Biological Process: protein sumoylation (GO:0016925);	1	14	283	15939	c84957.graph_c1
Biological Process: ion transmembrane transport (GO:0034220);	1	56	283	15939	c72044.graph_c0
Biological Process: protein targeting to mitochondrion (GO:0006626);	1	2	283	15939	c82375.graph_c1
Biological Process: protein homotetramerization (GO:0051289);	1	2	283	15939	c80164.graph_c1
Biological Process: mitochondrion morphogenesis (GO:0070584);	1	1	283	15939	c43543.graph_c0
Biological Process: multicellular organism development (GO:0007275);	1	49	283	15939	c76355.graph_c0
Biological Process: peptidyl-lysine modification (GO:0018205);	1	1	283	15939	c42754.graph_c0
Biological Process: UDP-glucose metabolic process (GO:0006011);	1	8	283	15939	c80751.graph_c1
Biological Process: deoxyribonucleoside monophosphate biosynthetic process (GO:0009157);	1	5	283	15939	c87083.graph_c0
Biological Process: cell wall organization (GO:0071555);	1	109	283	15939	c88274.graph_c0
Biological Process: post-embryonic development (GO:0009791);	1	16	283	15939	c81621.graph_c0
Biological Process: one-carbon metabolic process (GO:0006730);	1	37	283	15939	c54586.graph_c0
Biological Process: glycolytic process (GO:0006096);	1	98	283	15939	c38218.graph_c0
Biological Process: maturation of LSU-rRNA from tricistronic rRNA transcript (SSU-rRNA, 5.8S rRNA, LSU-rRNA) (GO:0000463);	1	27	283	15939	c38221.graph_c0
Biological Process: positive regulation of cellular process (GO:0048522);	1	10	283	15939	c92575.graph_c0
Biological Process: nucleic acid phosphodiester bond hydrolysis (GO:0090305);	1	67	283	15939	c44123.graph_c0
Biological Process: regulation of cellular process (GO:0050794);	1	62	283	15939	c91600.graph_c0
Biological Process: cellular water homeostasis (GO:0009992);	1	23	283	15939	c72044.graph_c0
Biological Process: endocytosis (GO:0006897);	1	50	283	15939	c62810.graph_c1
Biological Process: oligopeptide transport (GO:0006857);	1	20	283	15939	c71375.graph_c0
Biological Process: gibberellin catabolic process (GO:0045487);	1	3	283	15939	c83948.graph_c0
Biological Process: ribonucleoprotein complex biogenesis (GO:0022613);	1	2	283	15939	c61871.graph_c1
Biological Process: proteasome regulatory particle assembly (GO:0070682);	1	6	283	15939	c38434.graph_c0
Biological Process: deoxyribonucleoside diphosphate metabolic process (GO:0009186);	1	4	283	15939	c55081.graph_c0
Biological Process: DNA repair (GO:0006281);	1	94	283	15939	c61427.graph_c1
Biological Process: polysaccharide catabolic process (GO:0000272);	1	13	283	15939	c88832.graph_c0
Biological Process: regulation of SNARE complex assembly (GO:0035542);	1	8	283	15939	c80286.graph_c0
Biological Process: xenobiotic transport (GO:0042908);	1	17	283	15939	c91980.graph_c1
Biological Process: sulfate assimilation (GO:0000103);	1	33	283	15939	c92210.graph_c1
Biological Process: regulation of intracellular pH (GO:0051453);	1	13	283	15939	c87235.graph_c1
Biological Process: ATP hydrolysis coupled proton transport (GO:0015991);	1	118	283	15939	c93196.graph_c0
Biological Process: isoprenoid biosynthetic process (GO:0008299);	1	27	283	15939	c77946.graph_c1
Biological Process: interstrand cross-link repair (GO:0036297);	1	4	283	15939	c82126.graph_c0
Biological Process: regulation of primary metabolic process (GO:0080090);	1	13	283	15939	c92575.graph_c0
Biological Process: glucose transmembrane transport (GO:1904659);	1	18	283	15939	c89615.graph_c2
Biological Process: U4 snRNA 3'-end processing (GO:0034475);	1	5	283	15939	c85847.graph_c0
Biological Process: petal epidermis patterning (GO:0080172);	1	3	283	15939	c73806.graph_c0
Biological Process: positive regulation of mitotic metaphase/anaphase transition (GO:0045842);	1	5	283	15939	c80207.graph_c0
Biological Process: signal transduction (GO:0007165);	1	126	283	15939	c38482.graph_c0
Biological Process: actin filament severing (GO:0051014);	1	1	283	15939	c55432.graph_c0
Biological Process: histone exchange (GO:0043486);	1	7	283	15939	c61427.graph_c1
Biological Process: polyadenylation-dependent snoRNA 3'-end processing (GO:0071051);	1	5	283	15939	c85847.graph_c0
Biological Process: transcription from RNA polymerase II promoter (GO:0006366);	1	47	283	15939	c61194.graph_c0
Biological Process: positive regulation of cellular metabolic process (GO:0031325);	1	11	283	15939	c42754.graph_c0
Biological Process: lipid metabolic process (GO:0006629);	1	121	283	15939	c66000.graph_c0
Biological Process: response to zinc ion (GO:0010043);	1	11	283	15939	c89720.graph_c0
Biological Process: glycerol ether metabolic process (GO:0006662);	1	39	283	15939	c92210.graph_c1
Biological Process: lipid transport (GO:0006869);	1	21	283	15939	c73212.graph_c0
Biological Process: protein depalmitoylation (GO:0002084);	1	3	283	15939	c83540.graph_c0
Biological Process: response to hormone (GO:0009725);	1	14	283	15939	c87200.graph_c0
Biological Process: urea transmembrane transport (GO:0071918);	1	4	283	15939	c87305.graph_c0
Biological Process: actomyosin contractile ring contraction (GO:0000916);	1	2	283	15939	c61427.graph_c1
Biological Process: organic substance biosynthetic process (GO:1901576);	1	7	283	15939	c92575.graph_c0
Biological Process: vesicle-mediated transport (GO:0016192);	1	113	283	15939	c92290.graph_c1
Biological Process: hexose transmembrane transport (GO:0035428);	1	5	283	15939	c76325.graph_c0
Biological Process: leaf senescence (GO:0010150);	1	12	283	15939	c78805.graph_c0
Biological Process: callose deposition in cell wall (GO:0052543);	1	3	283	15939	c80751.graph_c1
Biological Process: regulation of cellular biosynthetic process (GO:0031326);	1	6	283	15939	c92575.graph_c0
Biological Process: rRNA methylation (GO:0031167);	1	12	283	15939	c93139.graph_c0
Biological Process: protein complex localization (GO:0031503);	1	1	283	15939	c38434.graph_c0
Biological Process: response to light stimulus (GO:0009416);	1	47	283	15939	c83948.graph_c0
Biological Process: mitochondrial ATP synthesis coupled electron transport (GO:0042775);	1	2	283	15939	c55052.graph_c0
Biological Process: tRNA N2-guanine methylation (GO:0002940);	1	3	283	15939	c91986.graph_c0
Biological Process: response to cytokinin (GO:0009735);	1	65	283	15939	c83765.graph_c0
Biological Process: transcription, RNA-templated (GO:0001172);	1	12	283	15939	c92791.graph_c0
Biological Process: gamma-aminobutyric acid catabolic process (GO:0009450);	1	8	283	15939	c62534.graph_c1
Biological Process: AMP biosynthetic process (GO:0006167);	1	9	283	15939	c78380.graph_c0
Biological Process: potassium ion transmembrane transport (GO:0071805);	1	45	283	15939	c85105.graph_c0
Biological Process: ATP metabolic process (GO:0046034);	1	12	283	15939	c93196.graph_c0
Biological Process: mitotic actomyosin contractile ring assembly (GO:1903475);	1	6	283	15939	c61427.graph_c1
Biological Process: acetate metabolic process (GO:0006083);	1	4	283	15939	c79733.graph_c0
Biological Process: ATP biosynthetic process (GO:0006754);	1	22	283	15939	c87235.graph_c1
Biological Process: chromatin organization (GO:0006325);	1	10	283	15939	c93256.graph_c0
Biological Process: protein N-linked glycosylation (GO:0006487);	1	27	283	15939	c88377.graph_c0
Biological Process: regulation of cellular protein metabolic process (GO:0032268);	1	1	283	15939	c81621.graph_c0
Biological Process: maintenance of translational fidelity (GO:1990145);	1	1	283	15939	c64035.graph_c0
Biological Process: ribosomal large subunit biogenesis (GO:0042273);	1	17	283	15939	c56158.graph_c0
Biological Process: vacuole inheritance (GO:0000011);	1	6	283	15939	c61427.graph_c1
Biological Process: protein secretion (GO:0009306);	1	14	283	15939	c61427.graph_c1
Biological Process: vacuole fusion, non-autophagic (GO:0042144);	1	10	283	15939	c80286.graph_c0
Biological Process: establishment or maintenance of cell polarity regulating cell shape (GO:0071963);	1	5	283	15939	c61427.graph_c1
Biological Process: regulation of transport (GO:0051049);	1	3	283	15939	c92575.graph_c0
Biological Process: cellular calcium ion homeostasis (GO:0006874);	1	7	283	15939	c93196.graph_c0
Biological Process: positive regulation of proteasomal protein catabolic process (GO:1901800);	1	8	283	15939	c38434.graph_c0
Biological Process: peptide catabolic process (GO:0043171);	1	6	283	15939	c38434.graph_c0
Biological Process: nucleobase-containing small molecule metabolic process (GO:0055086);	1	7	283	15939	c38150.graph_c0
Biological Process: nuclear mRNA surveillance (GO:0071028);	1	5	283	15939	c85847.graph_c0
Biological Process: monovalent inorganic cation transport (GO:0015672);	1	4	283	15939	c76969.graph_c0
Biological Process: histone H3-K36 methylation (GO:0010452);	1	4	283	15939	c90636.graph_c0
Biological Process: organophosphate metabolic process (GO:0019637);	1	2	283	15939	c56131.graph_c0
Biological Process: cellular response to phosphate starvation (GO:0016036);	1	12	283	15939	c85368.graph_c0
Biological Process: ribonucleoside monophosphate biosynthetic process (GO:0009156);	1	6	283	15939	c54616.graph_c0
