# Supplementary material for: Investigation of an Antioxidative System for Salinity Tolerance in Oenanthe javanica
Source: Antioxidants (Basel). 2020 Oct 1;9(10):940. doi: 10.3390/antiox9100940 (PMC7601823; doi:10.3390/antiox9100940)
Supplement: Supplementary file 1 [file antioxidants-09-00940-s001.zip › Supplementary table 6 KEGG analysis of DEGs.xlsx]

## Sheet: KEGG of DEGs in V11E0022
KEGG analysis of DEGs in V11E0022
#KEGG_n	374	KEGG_N	8417
#Pathway	ko_ID	DEG_in_Pathway	AllGene_in_Pathway	DEG_in_All_pathways	AllGene_in_All_pathways	Gene_id	KEGG_Orthology
Plant hormone signal transduction	ko04075	50	331	374	8417	c38587.graph_c0;c55304.graph_c0;c55682.graph_c0;c65450.graph_c0;c67631.graph_c0;c70327.graph_c0;c71127.graph_c0;c71208.graph_c0;c72446.graph_c1;c74278.graph_c0;c75743.graph_c0;c79344.graph_c0;c79650.graph_c0;c79924.graph_c0;c80025.graph_c0;c80622.graph_c0;c80793.graph_c0;c81125.graph_c0;c81152.graph_c0;c81793.graph_c0;c81865.graph_c0;c82207.graph_c0;c82747.graph_c0;c82782.graph_c0;c83344.graph_c1…	K14484+K14496+K14490+K14488+K14489+K14496+K14488+K14496+K14432+K13946+K14488+K14498+K14496+K14497+K14496+K14497+K14484+K14486+K14488+K14492+K14484+K14498+K14492+K14493+K14484+K13449+K14431+K14497+K14488+K14500+K14496+K13946+K14498+K14486+K13422+K14514+K14493+K14484+K14498+K14491+K14494+K14431+K14488+K14497+K13946+K14432+K14488+K14493+K14491+K14489
Carbon metabolism	ko01200	44	656	374	8417	c43078.graph_c0;c62129.graph_c0;c62774.graph_c0;c64191.graph_c0;c65802.graph_c1;c65904.graph_c0;c69053.graph_c0;c69858.graph_c1;c70641.graph_c0;c76533.graph_c0;c78535.graph_c0;c79427.graph_c0;c79477.graph_c0;c79805.graph_c0;c80164.graph_c0;c80164.graph_c1;c81270.graph_c0;c81592.graph_c2;c81985.graph_c0;c82221.graph_c0;c82603.graph_c0;c82835.graph_c0;c84235.graph_c0;c84615.graph_c0;c85180.graph_c0…	K05298+K05298+K00026+K00026+K11517+K01602+K00830+K05298+K03841+K18121+K00873+K05605+K01070+K00626+K00029+K00029+K01623+K14272+K01689+K15634+K01100+K00844+K00058+K01602+K00850+K15918+K00927+K00134+K00605+K01807+K00844+K14272+K05298+K01938+K03841+K00627+K01783+K01962+K00058+K00855+K00058+K15633+K15919+K01595
Starch and sucrose metabolism	ko00500	26	319	374	8417	c62638.graph_c0;c65323.graph_c0;c66311.graph_c0;c66700.graph_c0;c76273.graph_c0;c76553.graph_c0;c76915.graph_c0;c77638.graph_c0;c80407.graph_c0;c82106.graph_c0;c82835.graph_c0;c83226.graph_c0;c85219.graph_c0;c85819.graph_c0;c86451.graph_c0;c86892.graph_c0;c87165.graph_c1;c87311.graph_c1;c87570.graph_c0;c88877.graph_c0;c89588.graph_c0;c89642.graph_c0;c89725.graph_c0;c90126.graph_c0;c90283.graph_c0…	K01193+K01193+K05350+K01193+K16055+K16055+K00688+K19891+K01176+K01051+K00844+K16055+K01087+K16055+K01193+K01177+K13648+K00844+K01051+K08679+K00688+K05349+K00975+K01087+K00975+K01176
Biosynthesis of amino acids	ko01230	23	455	374	8417	c78535.graph_c0;c78726.graph_c0;c79487.graph_c0;c81270.graph_c0;c81295.graph_c1;c81592.graph_c2;c81985.graph_c0;c82221.graph_c0;c84235.graph_c0;c84771.graph_c0;c85180.graph_c0;c85251.graph_c0;c85730.graph_c1;c85818.graph_c2;c87062.graph_c0;c87698.graph_c0;c87859.graph_c0;c89309.graph_c1;c89791.graph_c0;c90246.graph_c0;c91510.graph_c1;c91770.graph_c0;c92438.graph_c0	K00873+K00815+K14677+K01623+K00815+K14272+K01689+K15634+K00058+K00286+K00850+K00872+K00927+K00134+K01807+K14272+K00826+K01783+K00058+K01915+K00058+K15633+K01626
Carbon fixation in photosynthetic organisms	ko00710	22	210	374	8417	c43078.graph_c0;c62129.graph_c0;c62774.graph_c0;c64191.graph_c0;c65904.graph_c0;c69858.graph_c1;c70641.graph_c0;c80164.graph_c0;c80164.graph_c1;c81270.graph_c0;c81592.graph_c2;c82603.graph_c0;c84615.graph_c0;c85730.graph_c1;c85818.graph_c2;c87062.graph_c0;c87698.graph_c0;c87902.graph_c0;c88256.graph_c0;c89309.graph_c1;c91471.graph_c0;c92677.graph_c1	K05298+K05298+K00026+K00026+K01602+K05298+K03841+K00029+K00029+K01623+K14272+K01100+K01602+K00927+K00134+K01807+K14272+K05298+K03841+K01783+K00855+K01595
Photosynthesis	ko00195	19	111	374	8417	c71707.graph_c0;c76433.graph_c0;c77619.graph_c0;c78819.graph_c0;c79139.graph_c0;c79206.graph_c0;c80523.graph_c0;c82099.graph_c0;c82601.graph_c0;c83265.graph_c0;c83290.graph_c0;c83391.graph_c1;c85120.graph_c0;c87711.graph_c0;c88057.graph_c0;c89447.graph_c0;c90071.graph_c0;c90364.graph_c0;c91876.graph_c2	K02113+K08901+K08901+K02701+K02721+K03542+K02717+K02689+K02113+K02698+K02699+K08901+K02704+K02698+K02694+K02112+K03541+K02721+K02705
Glycolysis / Gluconeogenesis	ko00010	16	266	374	8417	c66561.graph_c0;c70641.graph_c0;c78535.graph_c0;c81270.graph_c0;c81985.graph_c0;c82221.graph_c0;c82835.graph_c0;c85180.graph_c0;c85730.graph_c1;c85818.graph_c2;c87311.graph_c1;c88256.graph_c0;c88364.graph_c2;c88821.graph_c1;c90111.graph_c0;c91770.graph_c0	K00128+K03841+K00873+K01623+K01689+K15634+K00844+K00850+K00927+K00134+K00844+K03841+K00627+K00128+K01568+K15633
Glycine, serine and threonine metabolism	ko00260	16	150	374	8417	c69053.graph_c0;c81592.graph_c2;c82221.graph_c0;c82921.graph_c0;c83729.graph_c0;c84235.graph_c0;c85209.graph_c0;c85251.graph_c0;c86072.graph_c2;c87698.graph_c0;c89013.graph_c0;c89791.graph_c0;c91510.graph_c1;c91770.graph_c0;c92278.graph_c0;c92961.graph_c1	K00830+K14272+K15634+K02437+K00306+K00058+K15918+K00872+K00605+K14272+K00827+K00058+K00058+K15633+K15919+K00276
Glyoxylate and dicarboxylate metabolism	ko00630	16	215	374	8417	c62774.graph_c0;c64191.graph_c0;c65802.graph_c1;c65904.graph_c0;c69053.graph_c0;c76533.graph_c0;c79805.graph_c0;c81592.graph_c2;c82921.graph_c0;c84615.graph_c0;c85209.graph_c0;c86072.graph_c2;c87698.graph_c0;c90246.graph_c0;c91499.graph_c1;c92278.graph_c0	K00026+K00026+K11517+K01602+K00830+K18121+K00626+K14272+K02437+K01602+K15918+K00605+K14272+K01915+K00284+K15919
Phenylpropanoid biosynthesis	ko00940	12	178	374	8417	c66311.graph_c0;c75512.graph_c1;c76634.graph_c0;c78398.graph_c0;c79091.graph_c0;c81316.graph_c0;c82468.graph_c0;c85072.graph_c0;c86889.graph_c0;c87219.graph_c0;c87994.graph_c0;c89642.graph_c0	K05350+K13066+K00430+K00430+K12355+K00083+K00430+K13065+K09754+K00487+K12355+K05349
Endocytosis	ko04144	12	325	374	8417	c67513.graph_c0;c75584.graph_c0;c77287.graph_c0;c79046.graph_c0;c82306.graph_c0;c85259.graph_c0;c85947.graph_c0;c87960.graph_c0;c88968.graph_c0;c90140.graph_c0;c91721.graph_c0;c91746.graph_c0	K07897+K00889+K01115+K07904+K19366+K12486+K10365+K01115+K01115+K12200+K00889+K00889
Galactose metabolism	ko00052	12	123	374	8417	c56120.graph_c0;c62638.graph_c0;c65323.graph_c0;c66700.graph_c0;c72044.graph_c0;c72044.graph_c1;c82835.graph_c0;c85180.graph_c0;c85611.graph_c0;c86451.graph_c0;c86572.graph_c0;c87311.graph_c1	K18819+K01193+K01193+K01193+K06617+K06617+K00844+K00850+K18819+K01193+K12309+K00844
Glycerolipid metabolism	ko00561	12	113	374	8417	c66561.graph_c0;c77165.graph_c0;c78923.graph_c0;c85209.graph_c0;c87574.graph_c0;c88483.graph_c0;c88725.graph_c0;c88821.graph_c1;c89559.graph_c0;c89681.graph_c1;c91616.graph_c0;c92298.graph_c1	K00128+K01054+K00901+K15918+K14674+K01054+K13523+K00128+K11155+K00901+K13508+K00679
Glycerophospholipid metabolism	ko00564	11	143	374	8417	c75534.graph_c0;c77287.graph_c0;c78923.graph_c0;c83540.graph_c0;c84822.graph_c0;c87574.graph_c0;c87960.graph_c0;c88725.graph_c0;c88968.graph_c0;c89681.graph_c1;c91616.graph_c0	K01047+K01115+K00901+K06130+K05929+K14674+K01115+K13523+K01115+K00901+K13508
Pyruvate metabolism	ko00620	11	226	374	8417	c62774.graph_c0;c64191.graph_c0;c66561.graph_c0;c78535.graph_c0;c79805.graph_c0;c80164.graph_c0;c80164.graph_c1;c88364.graph_c2;c88821.graph_c1;c89727.graph_c0;c92677.graph_c1	K00026+K00026+K00128+K00873+K00626+K00029+K00029+K00627+K00128+K01962+K01595
Plant-pathogen interaction	ko04626	11	219	374	8417	c74392.graph_c0;c76552.graph_c0;c78110.graph_c0;c78449.graph_c0;c83428.graph_c0;c85844.graph_c0;c86095.graph_c0;c87306.graph_c0;c88368.graph_c0;c89547.graph_c0;c90371.graph_c0	K04079+K05391+K13448+K13448+K13449+K13412+K13434+K09487+K13448+K09487+K05391
Terpenoid backbone biosynthesis	ko00900	11	106	374	8417	c71825.graph_c0;c76088.graph_c1;c77946.graph_c1;c78063.graph_c0;c79805.graph_c0;c80078.graph_c0;c80342.graph_c0;c83812.graph_c0;c85132.graph_c0;c85707.graph_c0;c86684.graph_c0	K13789+K15892+K05356+K13789+K00626+K00919+K01662+K13789+K01662+K00099+K10960
Pentose and glucuronate interconversions	ko00040	10	121	374	8417	c64406.graph_c0;c66561.graph_c0;c81141.graph_c0;c82106.graph_c0;c86904.graph_c0;c87570.graph_c0;c88821.graph_c1;c89309.graph_c1;c90613.graph_c0;c91484.graph_c0	K01728+K00128+K01728+K01051+K01728+K01051+K00128+K01783+K01728+K01728
Amino sugar and nucleotide sugar metabolism	ko00520	10	221	374	8417	c81362.graph_c0;c82835.graph_c0;c86667.graph_c1;c86913.graph_c0;c87165.graph_c1;c87311.graph_c1;c88149.graph_c0;c88877.graph_c0;c89725.graph_c0;c90283.graph_c0	K01209+K00844+K12448+K00966+K13648+K00844+K10046+K08679+K00975+K00975
Cysteine and methionine metabolism	ko00270	10	197	374	8417	c62774.graph_c0;c64191.graph_c0;c78726.graph_c0;c79097.graph_c1;c81295.graph_c1;c83598.graph_c1;c86767.graph_c0;c87859.graph_c0;c89013.graph_c0;c89683.graph_c0	K00026+K00026+K00815+K01244+K00815+K00547+K01611+K00826+K00827+K20772
Phosphatidylinositol signaling system	ko04070	9	123	374	8417	c75584.graph_c0;c78923.graph_c0;c80589.graph_c0;c81956.graph_c0;c84587.graph_c0;c89681.graph_c1;c91308.graph_c0;c91721.graph_c0;c91746.graph_c0	K00889+K00901+K00913+K05857+K00915+K00901+K01092+K00889+K00889
Protein processing in endoplasmic reticulum	ko04141	8	423	374	8417	c38290.graph_c0;c74392.graph_c0;c80173.graph_c1;c82555.graph_c0;c86245.graph_c0;c87306.graph_c0;c88372.graph_c0;c89547.graph_c0	K13993+K04079+K10661+K13993+K10666+K09487+K14012+K09487
Purine metabolism	ko00230	8	316	374	8417	c78535.graph_c0;c80218.graph_c0;c80287.graph_c0;c86446.graph_c0;c87449.graph_c0;c88191.graph_c0;c88737.graph_c0;c89904.graph_c0	K00873+K00759+K00759+K00088+K03018+K03787+K13811+K01939
Ubiquinone and other terpenoid-quinone biosynthesis	ko00130	8	52	374	8417	c78726.graph_c0;c81295.graph_c1;c82909.graph_c0;c85387.graph_c0;c85977.graph_c0;c87034.graph_c0;c87219.graph_c0;c91247.graph_c0	K00815+K00815+K03183+K12501+K01661+K02552+K00487+K14760
Fructose and mannose metabolism	ko00051	8	113	374	8417	c70641.graph_c0;c81270.graph_c0;c82835.graph_c0;c85180.graph_c0;c86669.graph_c0;c86913.graph_c0;c87311.graph_c1;c88256.graph_c0	K03841+K01623+K00844+K00850+K01103+K00966+K00844+K03841
Porphyrin and chlorophyll metabolism	ko00860	8	92	374	8417	c81328.graph_c0;c82675.graph_c0;c84598.graph_c0;c86684.graph_c0;c91508.graph_c0;c92239.graph_c0;c92991.graph_c0;c92991.graph_c1	K03405+K13606+K19073+K10960+K02492+K04035+K03403+K03403
Inositol phosphate metabolism	ko00562	8	125	374	8417	c38371.graph_c0;c75584.graph_c0;c80589.graph_c0;c81956.graph_c0;c84587.graph_c0;c91308.graph_c0;c91721.graph_c0;c91746.graph_c0	K00469+K00889+K00913+K05857+K00915+K01092+K00889+K00889
Oxidative phosphorylation	ko00190	7	327	374	8417	c67589.graph_c1;c71707.graph_c0;c78520.graph_c0;c82601.graph_c0;c83526.graph_c0;c84734.graph_c0;c89447.graph_c0	K01507+K02113+K01535+K02113+K05574+K05582+K02112
Photosynthesis - antenna proteins	ko00196	7	37	374	8417	c76596.graph_c0;c77958.graph_c0;c79799.graph_c0;c79907.graph_c0;c81407.graph_c0;c84437.graph_c0;c92262.graph_c0	K08908+K08916+K08910+K08913+K08917+K08914+K08908
Peroxisome	ko04146	7	181	374	8417	c65802.graph_c1;c69053.graph_c0;c79440.graph_c0;c82906.graph_c0;c83729.graph_c0;c84295.graph_c0;c92671.graph_c0	K11517+K00830+K03426+K01897+K00306+K13348+K13352
Fatty acid metabolism	ko01212	7	188	374	8417	c70041.graph_c0;c72355.graph_c0;c76229.graph_c0;c76946.graph_c0;c79805.graph_c0;c82906.graph_c0;c89727.graph_c0	K10256+K10256+K00059+K10258+K00626+K01897+K01962
Alanine, aspartate and glutamate metabolism	ko00250	7	140	374	8417	c69053.graph_c0;c81592.graph_c2;c85806.graph_c1;c87698.graph_c0;c89013.graph_c0;c89904.graph_c0;c90246.graph_c0	K00830+K14272+K01953+K14272+K00827+K01939+K01915
Ascorbate and aldarate metabolism	ko00053	7	92	374	8417	c38371.graph_c0;c66561.graph_c0;c74925.graph_c0;c79686.graph_c0;c86557.graph_c0;c88149.graph_c0;c88821.graph_c1	K00469+K00128+K00423+K00434+K00434+K10046+K00128
Glutathione metabolism	ko00480	7	164	374	8417	c74651.graph_c0;c74651.graph_c1;c75546.graph_c0;c79686.graph_c0;c80239.graph_c0;c82658.graph_c1;c86557.graph_c0	K00799+K00799+K00799+K00434+K00799+K00799+K00434
Carotenoid biosynthesis	ko00906	6	56	374	8417	c83494.graph_c1;c83977.graph_c0;c87669.graph_c0;c87757.graph_c0;c88072.graph_c0;c88910.graph_c0	K06444+K09843+K09839+K09840+K09840+K09840
Arginine and proline metabolism	ko00330	6	102	374	8417	c66561.graph_c0;c82821.graph_c0;c84771.graph_c0;c86767.graph_c0;c88047.graph_c0;c88821.graph_c1	K00128+K00472+K00286+K01611+K00318+K00128
Valine, leucine and isoleucine degradation	ko00280	6	126	374	8417	c66561.graph_c0;c79427.graph_c0;c79805.graph_c0;c87859.graph_c0;c88821.graph_c1;c89013.graph_c0	K00128+K05605+K00626+K00826+K00128+K00827
Nitrogen metabolism	ko00910	6	73	374	8417	c77966.graph_c0;c79137.graph_c0;c81723.graph_c0;c90246.graph_c0;c90763.graph_c0;c91499.graph_c1	K01674+K01673+K01673+K01915+K10534+K00284
Pentose phosphate pathway	ko00030	6	133	374	8417	c70641.graph_c0;c81270.graph_c0;c85180.graph_c0;c87062.graph_c0;c88256.graph_c0;c89309.graph_c1	K03841+K01623+K00850+K01807+K03841+K01783
Circadian rhythm - plant	ko04712	6	74	374	8417	c78690.graph_c0;c82620.graph_c0;c88347.graph_c0;c90521.graph_c1;c91488.graph_c0;c91600.graph_c0	K16223+K00660+K10143+K12133+K12129+K12127
Flavonoid biosynthesis	ko00941	5	37	374	8417	c82620.graph_c0;c85072.graph_c0;c86889.graph_c0;c86972.graph_c1;c87219.graph_c0	K00660+K13065+K09754+K13082+K00487
alpha-Linolenic acid metabolism	ko00592	5	65	374	8417	c74270.graph_c0;c75534.graph_c0;c82538.graph_c0;c87574.graph_c0;c87803.graph_c0	K00454+K01047+K08241+K14674+K10526
Lysine degradation	ko00310	5	87	374	8417	c66561.graph_c0;c79805.graph_c0;c83729.graph_c0;c84570.graph_c0;c88821.graph_c1	K00128+K00626+K00306+K14157+K00128
Ether lipid metabolism	ko00565	5	41	374	8417	c75534.graph_c0;c77287.graph_c0;c87574.graph_c0;c87960.graph_c0;c88968.graph_c0	K01047+K01115+K14674+K01115+K01115
Tryptophan metabolism	ko00380	5	84	374	8417	c66561.graph_c0;c79805.graph_c0;c82530.graph_c0;c85372.graph_c0;c88821.graph_c1	K00128+K00626+K11816+K07408+K00128
beta-Alanine metabolism	ko00410	5	87	374	8417	c66561.graph_c0;c79427.graph_c0;c87847.graph_c0;c88821.graph_c1;c92961.graph_c1	K00128+K05605+K01464+K00128+K00276
mRNA surveillance pathway	ko03015	5	250	374	8417	c65550.graph_c0;c73439.graph_c0;c77900.graph_c0;c80691.graph_c0;c88172.graph_c1	K11584+K03265+K14376+K14411+K14376
Pyrimidine metabolism	ko00240	5	234	374	8417	c81480.graph_c0;c87449.graph_c0;c87847.graph_c0;c88191.graph_c0;c91521.graph_c0	K01240+K03018+K01464+K03787+K00384
Ribosome	ko03010	4	778	374	8417	c73180.graph_c0;c74190.graph_c0;c78185.graph_c0;c84547.graph_c0	K02933+K02881+K02931+K02963
RNA transport	ko03013	4	347	374	8417	c74905.graph_c1;c77784.graph_c0;c79517.graph_c0;c92136.graph_c0	K03260+K03231+K14290+K14308
Biosynthesis of unsaturated fatty acids	ko01040	4	80	374	8417	c70041.graph_c0;c72355.graph_c0;c76229.graph_c0;c76946.graph_c0	K10256+K10256+K00059+K10258
Arginine biosynthesis	ko00220	4	73	374	8417	c79487.graph_c0;c81592.graph_c2;c87698.graph_c0;c90246.graph_c0	K14677+K14272+K14272+K01915
Fatty acid degradation	ko00071	4	116	374	8417	c66561.graph_c0;c79805.graph_c0;c82906.graph_c0;c88821.graph_c1	K00128+K00626+K01897+K00128
Zeatin biosynthesis	ko00908	4	34	374	8417	c69779.graph_c0;c81736.graph_c0;c85213.graph_c2;c86359.graph_c0	K13495+K00279+K00279+K10760
Fatty acid biosynthesis	ko00061	4	89	374	8417	c76229.graph_c0;c82906.graph_c0;c89480.graph_c0;c89727.graph_c0	K00059+K01897+K10782+K01962
Spliceosome	ko03040	4	409	374	8417	c84565.graph_c0;c87626.graph_c0;c91890.graph_c0;c92785.graph_c1	K12900+K12896+K11093+K12822
Base excision repair	ko03410	4	68	374	8417	c78953.graph_c0;c82908.graph_c0;c82908.graph_c1;c85374.graph_c0	K01246+K01246+K01246+K01246
ABC transporters	ko02010	4	53	374	8417	c66281.graph_c0;c82021.graph_c1;c91604.graph_c0;c92489.graph_c0	K05658+K05658+K05658+K05658
Phenylalanine metabolism	ko00360	4	62	374	8417	c78726.graph_c0;c81295.graph_c1;c87219.graph_c0;c92961.graph_c1	K00815+K00815+K00487+K00276
Nicotinate and nicotinamide metabolism	ko00760	4	49	374	8417	c79440.graph_c0;c81480.graph_c0;c83455.graph_c0;c88191.graph_c0	K03426+K01240+K18551+K03787
RNA degradation	ko03018	4	219	374	8417	c76498.graph_c0;c81985.graph_c0;c85180.graph_c0;c85847.graph_c0	K04077+K01689+K00850+K12590
2-Oxocarboxylic acid metabolism	ko01210	4	108	374	8417	c79487.graph_c0;c81592.graph_c2;c87698.graph_c0;c87859.graph_c0	K14677+K14272+K14272+K00826
Stilbenoid, diarylheptanoid and gingerol biosynthesis	ko00945	3	17	374	8417	c85072.graph_c0;c86889.graph_c0;c87219.graph_c0	K13065+K09754+K00487
Regulation of autophagy	ko04140	3	59	374	8417	c82065.graph_c0;c89952.graph_c0;c91185.graph_c0	K07198+K08332+K07198
Linoleic acid metabolism	ko00591	3	22	374	8417	c74270.graph_c0;c75534.graph_c0;c87574.graph_c0	K00454+K01047+K14674
Pantothenate and CoA biosynthesis	ko00770	3	45	374	8417	c84859.graph_c0;c87847.graph_c0;c87859.graph_c0	K00606+K01464+K00826
Citrate cycle (TCA cycle)	ko00020	3	156	374	8417	c62774.graph_c0;c64191.graph_c0;c88364.graph_c2	K00026+K00026+K00627
Isoquinoline alkaloid biosynthesis	ko00950	3	35	374	8417	c78726.graph_c0;c81295.graph_c1;c92961.graph_c1	K00815+K00815+K00276
Sulfur metabolism	ko00920	3	61	374	8417	c84873.graph_c0;c86042.graph_c0;c88737.graph_c0	K05907+K17725+K13811
Tropane, piperidine and pyridine alkaloid biosynthesis	ko00960	3	32	374	8417	c78726.graph_c0;c81295.graph_c1;c92961.graph_c1	K00815+K00815+K00276
Tyrosine metabolism	ko00350	3	62	374	8417	c78726.graph_c0;c81295.graph_c1;c92961.graph_c1	K00815+K00815+K00276
Phenylalanine, tyrosine and tryptophan biosynthesis	ko00400	3	61	374	8417	c78726.graph_c0;c81295.graph_c1;c92438.graph_c0	K00815+K00815+K01626
Phagosome	ko04145	3	178	374	8417	c67513.graph_c0;c79716.graph_c0;c92982.graph_c0	K07897+K04392+K07374
One carbon pool by folate	ko00670	3	53	374	8417	c77781.graph_c0;c86072.graph_c2;c88181.graph_c0	K01934+K00605+K01938
Cutin, suberine and wax biosynthesis	ko00073	3	38	374	8417	c72524.graph_c0;c77391.graph_c0;c79502.graph_c0	K15400+K17991+K15398
Propanoate metabolism	ko00640	3	86	374	8417	c79427.graph_c0;c79805.graph_c0;c89727.graph_c0	K05605+K00626+K01962
Selenocompound metabolism	ko00450	2	47	374	8417	c88737.graph_c0;c91521.graph_c0	K13811+K00384
AGE-RAGE signaling pathway in diabetic complications	ko04933	2	28	374	8417	c79716.graph_c0;c81956.graph_c0	K04392+K05857
Aminoacyl-tRNA biosynthesis	ko00970	2	127	374	8417	c87891.graph_c0;c91399.graph_c0	K01893+K01893
Butanoate metabolism	ko00650	2	66	374	8417	c76533.graph_c0;c79805.graph_c0	K18121+K00626
Sphingolipid metabolism	ko00600	2	49	374	8417	c86572.graph_c0;c90266.graph_c1	K12309+K01634
Cyanoamino acid metabolism	ko00460	2	70	374	8417	c66311.graph_c0;c89642.graph_c0	K05350+K05349
N-Glycan biosynthesis	ko00510	2	93	374	8417	c86626.graph_c2;c89235.graph_c0	K00737+K00737
Fatty acid elongation	ko00062	2	56	374	8417	c76946.graph_c0;c77620.graph_c0	K10258+K15397
Diterpenoid biosynthesis	ko00904	2	26	374	8417	c75143.graph_c0;c83948.graph_c0	K04125+K04125
Thiamine metabolism	ko00730	2	26	374	8417	c80342.graph_c0;c85132.graph_c0	K01662+K01662
Arachidonic acid metabolism	ko00590	2	33	374	8417	c75534.graph_c0;c87574.graph_c0	K01047+K14674
Ribosome biogenesis in eukaryotes	ko03008	2	186	374	8417	c79517.graph_c0;c89536.graph_c0	K14290+K14546
Glycosaminoglycan degradation	ko00531	2	25	374	8417	c86572.graph_c0;c93045.graph_c0	K12309+K07964
Other glycan degradation	ko00511	2	37	374	8417	c75040.graph_c0;c86572.graph_c0	K01206+K12309
Histidine metabolism	ko00340	2	40	374	8417	c66561.graph_c0;c88821.graph_c1	K00128+K00128
Vitamin B6 metabolism	ko00750	1	23	374	8417	c83037.graph_c0	K06215
RNA polymerase	ko03020	1	80	374	8417	c87449.graph_c0	K03018
Brassinosteroid biosynthesis	ko00905	1	12	374	8417	c83236.graph_c0	K12640
Flavone and flavonol biosynthesis	ko00944	1	4	374	8417	c67471.graph_c0	K13269
DNA replication	ko03030	1	85	374	8417	c85353.graph_c1	K02542
Glycosphingolipid biosynthesis - ganglio series	ko00604	1	18	374	8417	c86572.graph_c0	K12309
Proteasome	ko03050	1	120	374	8417	c83642.graph_c0	K06700
Other types of O-glycan biosynthesis	ko00514	1	13	374	8417	c88485.graph_c1	K18134
Monoterpenoid biosynthesis	ko00902	1	7	374	8417	c75212.graph_c0	K15086
Valine, leucine and isoleucine biosynthesis	ko00290	1	30	374	8417	c87859.graph_c0	K00826
Synthesis and degradation of ketone bodies	ko00072	1	26	374	8417	c79805.graph_c0	K00626
Monobactam biosynthesis	ko00261	1	16	374	8417	c88737.graph_c0	K13811
Ubiquitin mediated proteolysis	ko04120	1	265	374	8417	c88347.graph_c0	K10143
Biotin metabolism	ko00780	1	29	374	8417	c76229.graph_c0	K00059
Steroid biosynthesis	ko00100	1	37	374	8417	c87574.graph_c0	K14674

## Sheet: KEGG of DEG in V11E0135
KEGG analysis of DEGs in V11E0135																KEGG analysis of DEGs in V11E0022																KEGG analysis of DEGs in V11E0022																KEGG analysis of DEGs in V11E0022
#KEGG_n	365	KEGG_N	8417
#Pathway	ko_ID	DEG_in_Pathway	AllGene_in_Pathway	DEG_in_All_pathways	AllGene_in_All_pathways	Gene_id	KEGG_Orthology
Ribosome	ko03010	32	778	365	8417	c38135.graph_c0;c38179.graph_c0;c38346.graph_c0;c39442.graph_c0;c40057.graph_c0;c40200.graph_c0;c41985.graph_c0;c44221.graph_c0;c44245.graph_c0;c44377.graph_c0;c44708.graph_c0;c45129.graph_c0;c45129.graph_c1;c51223.graph_c0;c55271.graph_c0;c56580.graph_c0;c61750.graph_c1;c69277.graph_c0;c74191.graph_c0;c75091.graph_c0;c84547.graph_c0;c93213.graph_c0;c93220.graph_c0;c93228.graph_c0;c93249.graph_c0…	K02915+K02896+K02905+K02908+K02880+K02898+K02927+K02930+K02977+K02870+K02918+K02865+K02865+K02987+K02866+K02889+K02971+K02962+K02885+K02969+K02963+K02951+K02894+K02980+K02998+K02937+K02923+K02993+K02910+K02974+K02983+K02921
Carbon metabolism	ko01200	27	656	365	8417	c38218.graph_c0;c38348.graph_c0;c38448.graph_c0;c44473.graph_c0;c46235.graph_c0;c54521.graph_c0;c54616.graph_c0;c54646.graph_c0;c56131.graph_c0;c62596.graph_c0;c62849.graph_c0;c65576.graph_c0;c65802.graph_c1;c65919.graph_c0;c68057.graph_c0;c69858.graph_c1;c71780.graph_c0;c76012.graph_c0;c77599.graph_c2;c80164.graph_c1;c87062.graph_c0;c87330.graph_c0;c87445.graph_c0;c89727.graph_c0;c91174.graph_c0…	K01834+K00161+K00658+K01647+K01679+K00844+K00948+K00030+K00850+K01681+K01900+K00031+K11517+K00164+K00261+K05298+K01595+K01807+K00261+K00029+K01807+K01610+K00627+K01962+K00640+K01899+K00948
Plant hormone signal transduction	ko04075	26	331	365	8417	c55304.graph_c0;c65450.graph_c0;c69837.graph_c1;c70327.graph_c0;c71208.graph_c0;c74223.graph_c0;c74278.graph_c0;c76569.graph_c0;c79344.graph_c0;c79908.graph_c0;c80025.graph_c0;c80622.graph_c0;c81125.graph_c0;c81152.graph_c0;c81865.graph_c0;c82747.graph_c0;c83089.graph_c0;c83944.graph_c0;c85341.graph_c0;c86008.graph_c0;c86593.graph_c0;c87915.graph_c0;c88666.graph_c1;c88994.graph_c0;c89955.graph_c1…	K14496+K14488+K14496+K14496+K14496+K14484+K13946+K14496+K14498+K14488+K14496+K14497+K14486+K14488+K14484+K14492+K14504+K14497+K14496+K14484+K13422+K14514+K14484+K14494+K13946+K14488
Plant-pathogen interaction	ko04626	21	219	365	8417	c38175.graph_c0;c38356.graph_c0;c38482.graph_c0;c43614.graph_c0;c75997.graph_c0;c76361.graph_c0;c77517.graph_c0;c78110.graph_c0;c78449.graph_c0;c78655.graph_c0;c79163.graph_c0;c79919.graph_c0;c80957.graph_c0;c81773.graph_c0;c82006.graph_c0;c82776.graph_c0;c84140.graph_c0;c85844.graph_c0;c86572.graph_c1;c89023.graph_c0;c89547.graph_c0	K09487+K02183+K13459+K13448+K04079+K02183+K13448+K13448+K13448+K13448+K13448+K13448+K13448+K13448+K13425+K18875+K13424+K13412+K13412+K18835+K09487
Oxidative phosphorylation	ko00190	19	327	365	8417	c38330.graph_c0;c38366.graph_c0;c38780.graph_c0;c43302.graph_c0;c44203.graph_c0;c44211.graph_c0;c44556.graph_c0;c55269.graph_c0;c60880.graph_c0;c67589.graph_c1;c68241.graph_c0;c84734.graph_c0;c85838.graph_c1;c87235.graph_c1;c88363.graph_c0;c89447.graph_c0;c93147.graph_c0;c93196.graph_c0;c93405.graph_c0	K03942+K02256+K02135+K02136+K02137+K00411+K02149+K02134+K02265+K01507+K03935+K05582+K02111+K01535+K02108+K02112+K00417+K02147+K02261
Starch and sucrose metabolism	ko00500	17	319	365	8417	c54521.graph_c0;c68395.graph_c0;c72260.graph_c0;c72379.graph_c0;c76273.graph_c0;c76915.graph_c0;c80751.graph_c1;c83226.graph_c0;c85219.graph_c0;c85819.graph_c0;c86451.graph_c0;c88832.graph_c0;c88877.graph_c0;c89588.graph_c0;c89725.graph_c0;c90126.graph_c0;c91730.graph_c0	K00844+K16055+K00688+K20867+K16055+K00688+K00963+K16055+K01087+K16055+K01193+K01177+K08679+K00688+K00975+K01087+K00688
Protein processing in endoplasmic reticulum	ko04141	16	423	365	8417	c38129.graph_c0;c38171.graph_c0;c38175.graph_c0;c38290.graph_c0;c42939.graph_c0;c51163.graph_c0;c54698.graph_c0;c62719.graph_c0;c64947.graph_c0;c69813.graph_c0;c74446.graph_c0;c75997.graph_c0;c81155.graph_c0;c81997.graph_c0;c88118.graph_c0;c89547.graph_c0	K13525+K03283+K09487+K13993+K09580+K12666+K09580+K10956+K10839+K09486+K07953+K04079+K04523+K09490+K16196+K09487
RNA transport	ko03013	15	347	365	8417	c38156.graph_c0;c38188.graph_c0;c38274.graph_c0;c62952.graph_c0;c63062.graph_c0;c64035.graph_c0;c66529.graph_c0;c67549.graph_c0;c70997.graph_c0;c71269.graph_c0;c71926.graph_c0;c77784.graph_c0;c81621.graph_c0;c84957.graph_c1;c93166.graph_c0	K07936+K03247+K03251+K03248+K03236+K03113+K03252+K03260+K12160+K03262+K14290+K03231+K03250+K10577+K03242
Ribosome biogenesis in eukaryotes	ko03008	14	186	365	8417	c38156.graph_c0;c44123.graph_c0;c44351.graph_c0;c44436.graph_c0;c44900.graph_c0;c56099.graph_c0;c68439.graph_c0;c70102.graph_c0;c71926.graph_c0;c86393.graph_c0;c89011.graph_c0;c91460.graph_c1;c92800.graph_c0;c93139.graph_c0	K07936+K13288+K14538+K14565+K14570+K03097+K06943+K12845+K14290+K14554+K14564+K14552+K14550+K14563
Spliceosome	ko03040	14	409	365	8417	c38171.graph_c0;c38456.graph_c0;c55232.graph_c0;c61871.graph_c1;c64878.graph_c0;c66412.graph_c0;c70102.graph_c0;c70115.graph_c0;c70352.graph_c0;c77726.graph_c0;c79401.graph_c0;c81768.graph_c0;c84565.graph_c0;c92785.graph_c1	K03283+K12856+K12891+K12823+K12896+K12839+K12845+K12840+K12825+K12897+K12837+K12831+K12900+K12822
Biosynthesis of amino acids	ko01230	14	455	365	8417	c38218.graph_c0;c44473.graph_c0;c54616.graph_c0;c54646.graph_c0;c56131.graph_c0;c61983.graph_c0;c62596.graph_c0;c65576.graph_c0;c76012.graph_c0;c81295.graph_c1;c87062.graph_c0;c87597.graph_c2;c91174.graph_c0;c93623.graph_c0	K01834+K01647+K00948+K00030+K00850+K00500+K01681+K00031+K01807+K00815+K01807+K13832+K00640+K00948
Fatty acid metabolism	ko01212	13	188	365	8417	c43183.graph_c0;c66114.graph_c0;c73808.graph_c0;c77717.graph_c1;c79495.graph_c0;c80827.graph_c0;c81646.graph_c0;c82296.graph_c0;c83360.graph_c0;c88091.graph_c0;c89727.graph_c0;c91870.graph_c0;c92960.graph_c0	K00665+K09458+K10258+K01897+K10256+K01897+K10256+K10256+K10256+K10256+K01962+K10256+K00665
Citrate cycle (TCA cycle)	ko00020	12	156	365	8417	c38348.graph_c0;c38448.graph_c0;c44473.graph_c0;c46235.graph_c0;c54646.graph_c0;c62596.graph_c0;c62849.graph_c0;c65576.graph_c0;c65919.graph_c0;c87330.graph_c0;c87445.graph_c0;c93351.graph_c0	K00161+K00658+K01647+K01679+K00030+K01681+K01900+K00031+K00164+K01610+K00627+K01899
Amino sugar and nucleotide sugar metabolism	ko00520	12	221	365	8417	c54521.graph_c0;c58962.graph_c0;c66457.graph_c0;c72379.graph_c0;c78643.graph_c1;c80751.graph_c1;c82485.graph_c0;c86407.graph_c0;c88149.graph_c0;c88810.graph_c1;c88877.graph_c0;c89725.graph_c0	K00844+K01784+K01183+K20867+K16190+K00963+K01183+K18677+K10046+K00966+K08679+K00975
Phenylpropanoid biosynthesis	ko00940	11	178	365	8417	c38124.graph_c0;c68169.graph_c0;c75512.graph_c1;c76634.graph_c0;c78054.graph_c0;c79700.graph_c0;c81316.graph_c0;c84970.graph_c0;c86064.graph_c0;c86409.graph_c0;c90816.graph_c0	K00430+K13065+K13066+K00430+K00430+K00430+K00083+K00430+K00430+K00430+K00430
Glutathione metabolism	ko00480	10	164	365	8417	c43687.graph_c0;c51379.graph_c0;c55081.graph_c0;c61655.graph_c0;c65576.graph_c0;c67152.graph_c0;c72544.graph_c1;c75546.graph_c0;c78390.graph_c0;c86557.graph_c0	K00432+K01581+K10808+K04097+K00031+K11140+K00799+K00799+K00799+K00434
Galactose metabolism	ko00052	9	123	365	8417	c54521.graph_c0;c56120.graph_c0;c56131.graph_c0;c58962.graph_c0;c72044.graph_c0;c80751.graph_c1;c82298.graph_c1;c86451.graph_c0;c86572.graph_c0	K00844+K18819+K00850+K01784+K06617+K00963+K00011+K01193+K12309
Glycolysis / Gluconeogenesis	ko00010	8	266	365	8417	c38218.graph_c0;c38348.graph_c0;c54521.graph_c0;c56131.graph_c0;c84851.graph_c0;c87330.graph_c0;c87445.graph_c0;c88821.graph_c1	K01834+K00161+K00844+K00850+K00001+K01610+K00627+K00128
Purine metabolism	ko00230	8	316	365	8417	c38352.graph_c0;c54616.graph_c0;c55081.graph_c0;c59855.graph_c0;c78380.graph_c0;c80218.graph_c0;c80287.graph_c0;c93623.graph_c0	K12304+K00948+K10808+K03006+K01939+K00759+K00759+K00948
Phosphatidylinositol signaling system	ko04070	8	123	365	8417	c38356.graph_c0;c66243.graph_c0;c76361.graph_c0;c78923.graph_c0;c81956.graph_c0;c84587.graph_c0;c91721.graph_c0;c91746.graph_c0	K02183+K00901+K02183+K00901+K05857+K00915+K00889+K00889
Pyruvate metabolism	ko00620	8	226	365	8417	c38348.graph_c0;c46235.graph_c0;c71780.graph_c0;c80164.graph_c1;c87330.graph_c0;c87445.graph_c0;c88821.graph_c1;c89727.graph_c0	K00161+K01679+K01595+K00029+K01610+K00627+K00128+K01962
RNA degradation	ko03018	8	219	365	8417	c38214.graph_c0;c44068.graph_c0;c56131.graph_c0;c69934.graph_c0;c70538.graph_c0;c85847.graph_c0;c86747.graph_c0;c89238.graph_c0	K12605+K04077+K00850+K12614+K12604+K12590+K12581+K10643
Photosynthesis	ko00195	7	111	365	8417	c82099.graph_c0;c83838.graph_c0;c85120.graph_c0;c85838.graph_c1;c88363.graph_c0;c89447.graph_c0;c91876.graph_c2	K02689+K02703+K02704+K02111+K02108+K02112+K02705
Ascorbate and aldarate metabolism	ko00053	7	92	365	8417	c66364.graph_c1;c74925.graph_c0;c78643.graph_c1;c82840.graph_c0;c86557.graph_c0;c88149.graph_c0;c88821.graph_c1	K00469+K00423+K16190+K08232+K00434+K10046+K00128
Biosynthesis of unsaturated fatty acids	ko01040	7	80	365	8417	c73808.graph_c0;c79495.graph_c0;c81646.graph_c0;c82296.graph_c0;c83360.graph_c0;c88091.graph_c0;c91870.graph_c0	K10258+K10256+K10256+K10256+K10256+K10256+K10256
Proteasome	ko03050	7	120	365	8417	c38434.graph_c0;c54687.graph_c0;c61459.graph_c1;c76644.graph_c0;c80207.graph_c0;c93235.graph_c0;c93315.graph_c0	K03062+K03035+K02730+K02725+K03036+K02732+K03032
Tryptophan metabolism	ko00380	7	84	365	8417	c65919.graph_c0;c79658.graph_c0;c80162.graph_c0;c85372.graph_c0;c85857.graph_c0;c86135.graph_c1;c88821.graph_c1	K00164+K11816+K11816+K07408+K11816+K16903+K00128
Fatty acid biosynthesis	ko00061	6	89	365	8417	c43183.graph_c0;c66114.graph_c0;c77717.graph_c1;c80827.graph_c0;c89727.graph_c0;c92960.graph_c0	K00665+K09458+K01897+K01897+K01962+K00665
Carbon fixation in photosynthetic organisms	ko00710	6	210	365	8417	c69858.graph_c1;c71780.graph_c0;c76012.graph_c0;c80164.graph_c1;c87062.graph_c0;c87330.graph_c0	K05298+K01595+K01807+K00029+K01807+K01610
Cysteine and methionine metabolism	ko00270	6	197	365	8417	c54586.graph_c0;c79071.graph_c0;c81295.graph_c1;c84633.graph_c0;c89683.graph_c0;c91174.graph_c0	K01251+K00547+K00815+K01611+K20772+K00640
Inositol phosphate metabolism	ko00562	6	125	365	8417	c66364.graph_c1;c74908.graph_c1;c81956.graph_c0;c84587.graph_c0;c91721.graph_c0;c91746.graph_c0	K00469+K01858+K05857+K00915+K00889+K00889
Phenylalanine metabolism	ko00360	5	62	365	8417	c38140.graph_c0;c61983.graph_c0;c79463.graph_c1;c81295.graph_c1;c92961.graph_c1	K00074+K00500+K00276+K00815+K00276
Pentose and glucuronate interconversions	ko00040	5	121	365	8417	c78643.graph_c1;c80751.graph_c1;c82298.graph_c1;c88821.graph_c1;c90613.graph_c0	K16190+K00963+K00011+K00128+K01728
Circadian rhythm - plant	ko04712	5	74	365	8417	c56099.graph_c0;c68351.graph_c0;c82335.graph_c0;c88347.graph_c0;c91600.graph_c0	K03097+K10143+K00660+K10143+K12127
Alanine, aspartate and glutamate metabolism	ko00250	5	140	365	8417	c62222.graph_c0;c62534.graph_c1;c68057.graph_c0;c77599.graph_c2;c78380.graph_c0	K01953+K13524+K00261+K00261+K01939
Glycerophospholipid metabolism	ko00564	5	143	365	8417	c66243.graph_c0;c76127.graph_c0;c78923.graph_c0;c82640.graph_c0;c83540.graph_c0	K00901+K00111+K00901+K00006+K06130
Phagosome	ko04145	5	178	365	8417	c44556.graph_c0;c62719.graph_c0;c75317.graph_c0;c79716.graph_c0;c93196.graph_c0	K02149+K10956+K07374+K04392+K02147
Ubiquitin mediated proteolysis	ko04120	5	265	365	8417	c68351.graph_c0;c84957.graph_c1;c86721.graph_c0;c88347.graph_c0;c88784.graph_c0	K10143+K10577+K10144+K10143+K10604
Fatty acid elongation	ko00062	5	56	365	8417	c73808.graph_c0;c87287.graph_c0;c90603.graph_c0;c91250.graph_c0;c93302.graph_c0	K10258+K15397+K15397+K15397+K15397
Peroxisome	ko04146	5	181	365	8417	c61672.graph_c0;c65576.graph_c0;c65802.graph_c1;c77717.graph_c1;c80827.graph_c0	K01640+K00031+K11517+K01897+K01897
Endocytosis	ko04144	5	325	365	8417	c38171.graph_c0;c62810.graph_c1;c77155.graph_c0;c91721.graph_c0;c91746.graph_c0	K03283+K04646+K07904+K00889+K00889
Pentose phosphate pathway	ko00030	5	133	365	8417	c54616.graph_c0;c56131.graph_c0;c76012.graph_c0;c87062.graph_c0;c93623.graph_c0	K00948+K00850+K01807+K01807+K00948
Glycerolipid metabolism	ko00561	5	113	365	8417	c66243.graph_c0;c78923.graph_c0;c82298.graph_c1;c83424.graph_c0;c88821.graph_c1	K00901+K00901+K00011+K01054+K00128
Fructose and mannose metabolism	ko00051	4	113	365	8417	c54521.graph_c0;c56131.graph_c0;c82298.graph_c1;c88810.graph_c1	K00844+K00850+K00011+K00966
Fatty acid degradation	ko00071	4	116	365	8417	c77717.graph_c1;c80827.graph_c0;c84851.graph_c0;c88821.graph_c1	K01897+K01897+K00001+K00128
2-Oxocarboxylic acid metabolism	ko01210	4	108	365	8417	c44473.graph_c0;c54646.graph_c0;c62596.graph_c0;c65576.graph_c0	K01647+K00030+K01681+K00031
Arginine and proline metabolism	ko00330	4	102	365	8417	c51379.graph_c0;c74946.graph_c0;c84633.graph_c0;c88821.graph_c1	K01581+K01583+K01611+K00128
Glycine, serine and threonine metabolism	ko00260	4	150	365	8417	c38218.graph_c0;c79463.graph_c1;c82921.graph_c0;c92961.graph_c1	K01834+K00276+K02437+K00276
beta-Alanine metabolism	ko00410	4	87	365	8417	c62534.graph_c1;c79463.graph_c1;c88821.graph_c1;c92961.graph_c1	K13524+K00276+K00128+K00276
Pyrimidine metabolism	ko00240	4	234	365	8417	c38150.graph_c0;c38352.graph_c0;c55081.graph_c0;c59855.graph_c0	K13800+K12304+K10808+K03006
Glyoxylate and dicarboxylate metabolism	ko00630	4	215	365	8417	c44473.graph_c0;c62596.graph_c0;c65802.graph_c1;c82921.graph_c0	K01647+K01681+K11517+K02437
Propanoate metabolism	ko00640	4	86	365	8417	c62534.graph_c1;c62849.graph_c0;c89727.graph_c0;c93351.graph_c0	K13524+K01900+K01962+K01899
Zeatin biosynthesis	ko00908	4	34	365	8417	c69779.graph_c0;c81736.graph_c0;c86359.graph_c0;c88961.graph_c0	K13495+K00279+K10760+K00279
Tyrosine metabolism	ko00350	4	62	365	8417	c79463.graph_c1;c81295.graph_c1;c84851.graph_c0;c92961.graph_c1	K00276+K00815+K00001+K00276
Sesquiterpenoid and triterpenoid biosynthesis	ko00909	3	16	365	8417	c76625.graph_c0;c79306.graph_c0;c89470.graph_c0	K14173+K14173+K00511
Isoquinoline alkaloid biosynthesis	ko00950	3	35	365	8417	c79463.graph_c1;c81295.graph_c1;c92961.graph_c1	K00276+K00815+K00276
Flavonoid biosynthesis	ko00941	3	37	365	8417	c68169.graph_c0;c80272.graph_c0;c82335.graph_c0	K13065+K05278+K00660
Nitrogen metabolism	ko00910	3	73	365	8417	c68057.graph_c0;c77599.graph_c2;c90763.graph_c0	K00261+K00261+K10534
Protein export	ko03060	3	96	365	8417	c43529.graph_c0;c62719.graph_c0;c81997.graph_c0	K13431+K10956+K09490
Butanoate metabolism	ko00650	3	66	365	8417	c38140.graph_c0;c61672.graph_c0;c62534.graph_c1	K00074+K01640+K13524
Terpenoid backbone biosynthesis	ko00900	3	106	365	8417	c77946.graph_c1;c78063.graph_c0;c93371.graph_c0	K05356+K13789+K14066
Valine, leucine and isoleucine degradation	ko00280	3	126	365	8417	c61672.graph_c0;c62534.graph_c1;c88821.graph_c1	K01640+K13524+K00128
Phenylalanine, tyrosine and tryptophan biosynthesis	ko00400	3	61	365	8417	c61983.graph_c0;c81295.graph_c1;c87597.graph_c2	K00500+K00815+K13832
Lysine degradation	ko00310	3	87	365	8417	c38448.graph_c0;c65919.graph_c0;c88821.graph_c1	K00658+K00164+K00128
Carotenoid biosynthesis	ko00906	3	56	365	8417	c75419.graph_c0;c80205.graph_c0;c83977.graph_c0	K15746+K15746+K09843
Cutin, suberine and wax biosynthesis	ko00073	3	38	365	8417	c43137.graph_c0;c72524.graph_c0;c79502.graph_c0	K13407+K15400+K15398
alpha-Linolenic acid metabolism	ko00592	3	65	365	8417	c74270.graph_c0;c82538.graph_c0;c91229.graph_c0	K00454+K08241+K00454
Sulfur metabolism	ko00920	3	61	365	8417	c55052.graph_c0;c84873.graph_c0;c91174.graph_c0	K08738+K05907+K00640
mRNA surveillance pathway	ko03015	3	250	365	8417	c53042.graph_c0;c61890.graph_c0;c69307.graph_c0	K04382+K14411+K14411
Ubiquinone and other terpenoid-quinone biosynthesis	ko00130	3	52	365	8417	c64734.graph_c0;c81295.graph_c1;c82909.graph_c0	K06134+K00815+K03183
Linoleic acid metabolism	ko00591	3	22	365	8417	c74270.graph_c0;c87181.graph_c0;c91229.graph_c0	K00454+K15718+K00454
Tropane, piperidine and pyridine alkaloid biosynthesis	ko00960	3	32	365	8417	c79463.graph_c1;c81295.graph_c1;c92961.graph_c1	K00276+K00815+K00276
Regulation of autophagy	ko04140	3	59	365	8417	c82065.graph_c0;c89952.graph_c0;c91185.graph_c0	K07198+K08332+K07198
Steroid biosynthesis	ko00100	2	37	365	8417	c83434.graph_c0;c89470.graph_c0	K00559+K00511
Other glycan degradation	ko00511	2	37	365	8417	c72074.graph_c0;c86572.graph_c0	K01191+K12309
SNARE interactions in vesicular transport	ko04130	2	52	365	8417	c87046.graph_c0;c92290.graph_c1	K08486+K08486
AGE-RAGE signaling pathway in diabetic complications	ko04933	2	28	365	8417	c79716.graph_c0;c81956.graph_c0	K04392+K05857
Brassinosteroid biosynthesis	ko00905	2	12	365	8417	c83236.graph_c0;c86127.graph_c0	K12640+K15639
Nucleotide excision repair	ko03420	2	110	365	8417	c64947.graph_c0;c73981.graph_c0	K10839+K10840
Glycosaminoglycan degradation	ko00531	2	25	365	8417	c73534.graph_c0;c86572.graph_c0	K10532+K12309
Arginine biosynthesis	ko00220	2	73	365	8417	c68057.graph_c0;c77599.graph_c2	K00261+K00261
Base excision repair	ko03410	2	68	365	8417	c78953.graph_c0;c85374.graph_c0	K01246+K01246
Arachidonic acid metabolism	ko00590	2	33	365	8417	c43687.graph_c0;c61655.graph_c0	K00432+K04097
ABC transporters	ko02010	2	53	365	8417	c91604.graph_c0;c92169.graph_c0	K05658+K05658
N-Glycan biosynthesis	ko00510	1	93	365	8417	c51163.graph_c0	K12666
Biotin metabolism	ko00780	1	29	365	8417	c66114.graph_c0	K09458
Folate biosynthesis	ko00790	1	28	365	8417	c81833.graph_c0	K03635
Vitamin B6 metabolism	ko00750	1	23	365	8417	c82266.graph_c0	K13248
Glycosphingolipid biosynthesis - ganglio series	ko00604	1	18	365	8417	c86572.graph_c0	K12309
Nicotinate and nicotinamide metabolism	ko00760	1	49	365	8417	c83455.graph_c0	K18551
Stilbenoid, diarylheptanoid and gingerol biosynthesis	ko00945	1	17	365	8417	c68169.graph_c0	K13065
Photosynthesis - antenna proteins	ko00196	1	37	365	8417	c76596.graph_c0	K08908
RNA polymerase	ko03020	1	80	365	8417	c59855.graph_c0	K03006
Cyanoamino acid metabolism	ko00460	1	70	365	8417	c56823.graph_c0	K08248
Diterpenoid biosynthesis	ko00904	1	26	365	8417	c83948.graph_c0	K04125
Sulfur relay system	ko04122	1	23	365	8417	c81833.graph_c0	K03635
Sphingolipid metabolism	ko00600	1	49	365	8417	c86572.graph_c0	K12309
Synthesis and degradation of ketone bodies	ko00072	1	26	365	8417	c61672.graph_c0	K01640
Aminoacyl-tRNA biosynthesis	ko00970	1	127	365	8417	c78132.graph_c0	K01881
Porphyrin and chlorophyll metabolism	ko00860	1	92	365	8417	c82675.graph_c0	K13606
Histidine metabolism	ko00340	1	40	365	8417	c88821.graph_c1	K00128
Other types of O-glycan biosynthesis	ko00514	1	13	365	8417	c62225.graph_c0	K09667

## Sheet: KEGG of upreg DEGs in V11E0022
KEGG analysis of upregulated DEGs in V11E0022																KEGG analysis of DEGs in V11E0135																KEGG analysis of DEGs in V11E0135																KEGG analysis of DEGs in V11E0135
#KEGG_n	128	KEGG_N	8417
#Pathway	ko_ID	DEG_in_Pathway	AllGene_in_Pathway	DEG_in_All_pathways	AllGene_in_All_pathways	Gene_id	KEGG_Orthology
Plant hormone signal transduction	ko04075	14	331	128	8417	c55682.graph_c0;c72446.graph_c1;c80622.graph_c0;c82782.graph_c0;c83804.graph_c0;c83944.graph_c0;c84945.graph_c0;c85598.graph_c0;c87915.graph_c0;c88437.graph_c0;c88890.graph_c1;c89046.graph_c0;c89772.graph_c0;c90670.graph_c1	K14490+K14432+K14497+K14493+K14431+K14497+K14500+K14498+K14514+K14493+K14491+K14431+K14497+K14432
Carbon metabolism	ko01200	14	656	128	8417	c62774.graph_c0;c64191.graph_c0;c65904.graph_c0;c78535.graph_c0;c79805.graph_c0;c80164.graph_c0;c80164.graph_c1;c81985.graph_c0;c82835.graph_c0;c84235.graph_c0;c85180.graph_c0;c85818.graph_c2;c89791.graph_c0;c91510.graph_c1	K00026+K00026+K01602+K00873+K00626+K00029+K00029+K01689+K00844+K00058+K00850+K00134+K00058+K00058
Biosynthesis of amino acids	ko01230	12	455	128	8417	c78535.graph_c0;c78726.graph_c0;c81295.graph_c1;c81985.graph_c0;c84235.graph_c0;c84771.graph_c0;c85180.graph_c0;c85818.graph_c2;c87859.graph_c0;c89791.graph_c0;c91510.graph_c1;c92438.graph_c0	K00873+K00815+K00815+K01689+K00058+K00286+K00850+K00134+K00826+K00058+K00058+K01626
Starch and sucrose metabolism	ko00500	9	319	128	8417	c66311.graph_c0;c76915.graph_c0;c80407.graph_c0;c82835.graph_c0;c86892.graph_c0;c89588.graph_c0;c89642.graph_c0;c89725.graph_c0;c92240.graph_c0	K05350+K00688+K01176+K00844+K01177+K00688+K05349+K00975+K01176
Cysteine and methionine metabolism	ko00270	8	197	128	8417	c62774.graph_c0;c64191.graph_c0;c78726.graph_c0;c81295.graph_c1;c83598.graph_c1;c86767.graph_c0;c87859.graph_c0;c89013.graph_c0	K00026+K00026+K00815+K00815+K00547+K01611+K00826+K00827
Protein processing in endoplasmic reticulum	ko04141	7	423	128	8417	c74392.graph_c0;c80173.graph_c1;c82555.graph_c0;c86245.graph_c0;c87306.graph_c0;c88372.graph_c0;c89547.graph_c0	K04079+K10661+K13993+K10666+K09487+K14012+K09487
Phenylpropanoid biosynthesis	ko00940	7	178	128	8417	c66311.graph_c0;c79091.graph_c0;c82468.graph_c0;c86889.graph_c0;c87219.graph_c0;c87994.graph_c0;c89642.graph_c0	K05350+K12355+K00430+K09754+K00487+K12355+K05349
Glycerolipid metabolism	ko00561	7	113	128	8417	c77165.graph_c0;c87574.graph_c0;c88483.graph_c0;c89559.graph_c0;c89681.graph_c1;c91616.graph_c0;c92298.graph_c1	K01054+K14674+K01054+K11155+K00901+K13508+K00679
Glycolysis / Gluconeogenesis	ko00010	6	266	128	8417	c78535.graph_c0;c81985.graph_c0;c82835.graph_c0;c85180.graph_c0;c85818.graph_c2;c90111.graph_c0	K00873+K01689+K00844+K00850+K00134+K01568
Carbon fixation in photosynthetic organisms	ko00710	6	210	128	8417	c62774.graph_c0;c64191.graph_c0;c65904.graph_c0;c80164.graph_c0;c80164.graph_c1;c85818.graph_c2	K00026+K00026+K01602+K00029+K00029+K00134
Pyruvate metabolism	ko00620	6	226	128	8417	c62774.graph_c0;c64191.graph_c0;c78535.graph_c0;c79805.graph_c0;c80164.graph_c0;c80164.graph_c1	K00026+K00026+K00873+K00626+K00029+K00029
Glycerophospholipid metabolism	ko00564	6	143	128	8417	c75534.graph_c0;c77287.graph_c0;c83540.graph_c0;c87574.graph_c0;c89681.graph_c1;c91616.graph_c0	K01047+K01115+K06130+K14674+K00901+K13508
Fatty acid metabolism	ko01212	5	188	128	8417	c70041.graph_c0;c72355.graph_c0;c76229.graph_c0;c79805.graph_c0;c82906.graph_c0	K10256+K10256+K00059+K00626+K01897
Endocytosis	ko04144	5	325	128	8417	c77287.graph_c0;c79046.graph_c0;c82306.graph_c0;c85259.graph_c0;c90140.graph_c0	K01115+K07904+K19366+K12486+K12200
Galactose metabolism	ko00052	5	123	128	8417	c72044.graph_c0;c72044.graph_c1;c82835.graph_c0;c85180.graph_c0;c86572.graph_c0	K06617+K06617+K00844+K00850+K12309
Glycine, serine and threonine metabolism	ko00260	5	150	128	8417	c84235.graph_c0;c89013.graph_c0;c89791.graph_c0;c91510.graph_c1;c92961.graph_c1	K00058+K00827+K00058+K00058+K00276
Plant-pathogen interaction	ko04626	5	219	128	8417	c74392.graph_c0;c85844.graph_c0;c86095.graph_c0;c87306.graph_c0;c89547.graph_c0	K04079+K13412+K13434+K09487+K09487
alpha-Linolenic acid metabolism	ko00592	4	65	128	8417	c75534.graph_c0;c82538.graph_c0;c87574.graph_c0;c87803.graph_c0	K01047+K08241+K14674+K10526
Phenylalanine metabolism	ko00360	4	62	128	8417	c78726.graph_c0;c81295.graph_c1;c87219.graph_c0;c92961.graph_c1	K00815+K00815+K00487+K00276
Purine metabolism	ko00230	4	316	128	8417	c78535.graph_c0;c86446.graph_c0;c87449.graph_c0;c88737.graph_c0	K00873+K00088+K03018+K13811
RNA degradation	ko03018	4	219	128	8417	c76498.graph_c0;c81985.graph_c0;c85180.graph_c0;c85847.graph_c0	K04077+K01689+K00850+K12590
Glyoxylate and dicarboxylate metabolism	ko00630	4	215	128	8417	c62774.graph_c0;c64191.graph_c0;c65904.graph_c0;c79805.graph_c0	K00026+K00026+K01602+K00626
Arginine and proline metabolism	ko00330	4	102	128	8417	c82821.graph_c0;c84771.graph_c0;c86767.graph_c0;c88047.graph_c0	K00472+K00286+K01611+K00318
Spliceosome	ko03040	4	409	128	8417	c84565.graph_c0;c87626.graph_c0;c91890.graph_c0;c92785.graph_c1	K12900+K12896+K11093+K12822
Phosphatidylinositol signaling system	ko04070	3	123	128	8417	c80589.graph_c0;c81956.graph_c0;c89681.graph_c1	K00913+K05857+K00901
Flavonoid biosynthesis	ko00941	3	37	128	8417	c82620.graph_c0;c86889.graph_c0;c87219.graph_c0	K00660+K09754+K00487
Pyrimidine metabolism	ko00240	3	234	128	8417	c81480.graph_c0;c87449.graph_c0;c87847.graph_c0	K01240+K03018+K01464
RNA transport	ko03013	3	347	128	8417	c74905.graph_c1;c77784.graph_c0;c79517.graph_c0	K03260+K03231+K14290
Valine, leucine and isoleucine degradation	ko00280	3	126	128	8417	c79805.graph_c0;c87859.graph_c0;c89013.graph_c0	K00626+K00826+K00827
Phenylalanine, tyrosine and tryptophan biosynthesis	ko00400	3	61	128	8417	c78726.graph_c0;c81295.graph_c1;c92438.graph_c0	K00815+K00815+K01626
Tyrosine metabolism	ko00350	3	62	128	8417	c78726.graph_c0;c81295.graph_c1;c92961.graph_c1	K00815+K00815+K00276
Ubiquinone and other terpenoid-quinone biosynthesis	ko00130	3	52	128	8417	c78726.graph_c0;c81295.graph_c1;c87219.graph_c0	K00815+K00815+K00487
Tropane, piperidine and pyridine alkaloid biosynthesis	ko00960	3	32	128	8417	c78726.graph_c0;c81295.graph_c1;c92961.graph_c1	K00815+K00815+K00276
Isoquinoline alkaloid biosynthesis	ko00950	3	35	128	8417	c78726.graph_c0;c81295.graph_c1;c92961.graph_c1	K00815+K00815+K00276
Biosynthesis of unsaturated fatty acids	ko01040	3	80	128	8417	c70041.graph_c0;c72355.graph_c0;c76229.graph_c0	K10256+K10256+K00059
Ether lipid metabolism	ko00565	3	41	128	8417	c75534.graph_c0;c77287.graph_c0;c87574.graph_c0	K01047+K01115+K14674
Terpenoid backbone biosynthesis	ko00900	3	106	128	8417	c77946.graph_c1;c79805.graph_c0;c85707.graph_c0	K05356+K00626+K00099
Amino sugar and nucleotide sugar metabolism	ko00520	3	221	128	8417	c82835.graph_c0;c86667.graph_c1;c89725.graph_c0	K00844+K12448+K00975
Inositol phosphate metabolism	ko00562	3	125	128	8417	c38371.graph_c0;c80589.graph_c0;c81956.graph_c0	K00469+K00913+K05857
Oxidative phosphorylation	ko00190	2	327	128	8417	c67589.graph_c1;c78520.graph_c0	K01507+K01535
Glutathione metabolism	ko00480	2	164	128	8417	c80239.graph_c0;c82658.graph_c1	K00799+K00799
Arachidonic acid metabolism	ko00590	2	33	128	8417	c75534.graph_c0;c87574.graph_c0	K01047+K14674
Peroxisome	ko04146	2	181	128	8417	c79440.graph_c0;c82906.graph_c0	K03426+K01897
Sulfur metabolism	ko00920	2	61	128	8417	c86042.graph_c0;c88737.graph_c0	K17725+K13811
Fatty acid degradation	ko00071	2	116	128	8417	c79805.graph_c0;c82906.graph_c0	K00626+K01897
Sphingolipid metabolism	ko00600	2	49	128	8417	c86572.graph_c0;c90266.graph_c1	K12309+K01634
Stilbenoid, diarylheptanoid and gingerol biosynthesis	ko00945	2	17	128	8417	c86889.graph_c0;c87219.graph_c0	K09754+K00487
Ribosome biogenesis in eukaryotes	ko03008	2	186	128	8417	c79517.graph_c0;c89536.graph_c0	K14290+K14546
Circadian rhythm - plant	ko04712	2	74	128	8417	c82620.graph_c0;c91600.graph_c0	K00660+K12127
Carotenoid biosynthesis	ko00906	2	56	128	8417	c83977.graph_c0;c88910.graph_c0	K09843+K09840
Fatty acid biosynthesis	ko00061	2	89	128	8417	c76229.graph_c0;c82906.graph_c0	K00059+K01897
Alanine, aspartate and glutamate metabolism	ko00250	2	140	128	8417	c85806.graph_c1;c89013.graph_c0	K01953+K00827
Lysine degradation	ko00310	2	87	128	8417	c79805.graph_c0;c84570.graph_c0	K00626+K14157
mRNA surveillance pathway	ko03015	2	250	128	8417	c73439.graph_c0;c88172.graph_c1	K03265+K14376
Citrate cycle (TCA cycle)	ko00020	2	156	128	8417	c62774.graph_c0;c64191.graph_c0	K00026+K00026
Cyanoamino acid metabolism	ko00460	2	70	128	8417	c66311.graph_c0;c89642.graph_c0	K05350+K05349
Fructose and mannose metabolism	ko00051	2	113	128	8417	c82835.graph_c0;c85180.graph_c0	K00844+K00850
Linoleic acid metabolism	ko00591	2	22	128	8417	c75534.graph_c0;c87574.graph_c0	K01047+K14674
Pantothenate and CoA biosynthesis	ko00770	2	45	128	8417	c87847.graph_c0;c87859.graph_c0	K01464+K00826
beta-Alanine metabolism	ko00410	2	87	128	8417	c87847.graph_c0;c92961.graph_c1	K01464+K00276
Nicotinate and nicotinamide metabolism	ko00760	2	49	128	8417	c79440.graph_c0;c81480.graph_c0	K03426+K01240
Steroid biosynthesis	ko00100	1	37	128	8417	c87574.graph_c0	K14674
Flavone and flavonol biosynthesis	ko00944	1	4	128	8417	c67471.graph_c0	K13269
Porphyrin and chlorophyll metabolism	ko00860	1	92	128	8417	c82675.graph_c0	K13606
Biotin metabolism	ko00780	1	29	128	8417	c76229.graph_c0	K00059
Monobactam biosynthesis	ko00261	1	16	128	8417	c88737.graph_c0	K13811
Ascorbate and aldarate metabolism	ko00053	1	92	128	8417	c38371.graph_c0	K00469
Base excision repair	ko03410	1	68	128	8417	c78953.graph_c0	K01246
RNA polymerase	ko03020	1	80	128	8417	c87449.graph_c0	K03018
Pentose phosphate pathway	ko00030	1	133	128	8417	c85180.graph_c0	K00850
Glycosphingolipid biosynthesis - ganglio series	ko00604	1	18	128	8417	c86572.graph_c0	K12309
Other glycan degradation	ko00511	1	37	128	8417	c86572.graph_c0	K12309
Diterpenoid biosynthesis	ko00904	1	26	128	8417	c83948.graph_c0	K04125
Selenocompound metabolism	ko00450	1	47	128	8417	c88737.graph_c0	K13811
2-Oxocarboxylic acid metabolism	ko01210	1	108	128	8417	c87859.graph_c0	K00826
Tryptophan metabolism	ko00380	1	84	128	8417	c79805.graph_c0	K00626
Valine, leucine and isoleucine biosynthesis	ko00290	1	30	128	8417	c87859.graph_c0	K00826
Butanoate metabolism	ko00650	1	66	128	8417	c79805.graph_c0	K00626
Synthesis and degradation of ketone bodies	ko00072	1	26	128	8417	c79805.graph_c0	K00626
Cutin, suberine and wax biosynthesis	ko00073	1	38	128	8417	c77391.graph_c0	K17991
Glycosaminoglycan degradation	ko00531	1	25	128	8417	c86572.graph_c0	K12309
DNA replication	ko03030	1	85	128	8417	c85353.graph_c1	K02542
AGE-RAGE signaling pathway in diabetic complications	ko04933	1	28	128	8417	c81956.graph_c0	K05857
Proteasome	ko03050	1	120	128	8417	c83642.graph_c0	K06700
Propanoate metabolism	ko00640	1	86	128	8417	c79805.graph_c0	K00626

## Sheet: KEGG of upreg DEGs in V11E0135
KEGG analysis of upregulated DEGs in V11E0135																KEGG analysis of upregulated DEGs in V11E0022																KEGG analysis of upregulated DEGs in V11E0022																KEGG analysis of upregulated DEGs in V11E0022
#KEGG_n	206	KEGG_N	8417
#Pathway	ko_ID	DEG_in_Pathway	AllGene_in_Pathway	DEG_in_All_pathways	AllGene_in_All_pathways	Gene_id	KEGG_Orthology
Ribosome	ko03010	31	778	206	8417	c38135.graph_c0;c38179.graph_c0;c38346.graph_c0;c39442.graph_c0;c40057.graph_c0;c40200.graph_c0;c41985.graph_c0;c44221.graph_c0;c44245.graph_c0;c44377.graph_c0;c44708.graph_c0;c45129.graph_c0;c45129.graph_c1;c51223.graph_c0;c55271.graph_c0;c56580.graph_c0;c61750.graph_c1;c69277.graph_c0;c74191.graph_c0;c75091.graph_c0;c93213.graph_c0;c93220.graph_c0;c93228.graph_c0;c93249.graph_c0;c93261.graph_c0…	K02915+K02896+K02905+K02908+K02880+K02898+K02927+K02930+K02977+K02870+K02918+K02865+K02865+K02987+K02866+K02889+K02971+K02962+K02885+K02969+K02951+K02894+K02980+K02998+K02937+K02923+K02993+K02910+K02974+K02983+K02921
Carbon metabolism	ko01200	18	656	206	8417	c38218.graph_c0;c38348.graph_c0;c38448.graph_c0;c44473.graph_c0;c46235.graph_c0;c54521.graph_c0;c54616.graph_c0;c54646.graph_c0;c56131.graph_c0;c62596.graph_c0;c62849.graph_c0;c65576.graph_c0;c65919.graph_c0;c68057.graph_c0;c71780.graph_c0;c80164.graph_c1;c93351.graph_c0;c93623.graph_c0	K01834+K00161+K00658+K01647+K01679+K00844+K00948+K00030+K00850+K01681+K01900+K00031+K00164+K00261+K01595+K00029+K01899+K00948
RNA transport	ko03013	15	347	206	8417	c38156.graph_c0;c38188.graph_c0;c38274.graph_c0;c62952.graph_c0;c63062.graph_c0;c64035.graph_c0;c66529.graph_c0;c67549.graph_c0;c70997.graph_c0;c71269.graph_c0;c71926.graph_c0;c77784.graph_c0;c81621.graph_c0;c84957.graph_c1;c93166.graph_c0	K07936+K03247+K03251+K03248+K03236+K03113+K03252+K03260+K12160+K03262+K14290+K03231+K03250+K10577+K03242
Protein processing in endoplasmic reticulum	ko04141	15	423	206	8417	c38129.graph_c0;c38171.graph_c0;c38175.graph_c0;c42939.graph_c0;c51163.graph_c0;c54698.graph_c0;c62719.graph_c0;c64947.graph_c0;c69813.graph_c0;c74446.graph_c0;c75997.graph_c0;c81155.graph_c0;c81997.graph_c0;c88118.graph_c0;c89547.graph_c0	K13525+K03283+K09487+K09580+K12666+K09580+K10956+K10839+K09486+K07953+K04079+K04523+K09490+K16196+K09487
Oxidative phosphorylation	ko00190	15	327	206	8417	c38330.graph_c0;c38366.graph_c0;c38780.graph_c0;c43302.graph_c0;c44203.graph_c0;c44211.graph_c0;c44556.graph_c0;c55269.graph_c0;c60880.graph_c0;c67589.graph_c1;c68241.graph_c0;c87235.graph_c1;c93147.graph_c0;c93196.graph_c0;c93405.graph_c0	K03942+K02256+K02135+K02136+K02137+K00411+K02149+K02134+K02265+K01507+K03935+K01535+K00417+K02147+K02261
Ribosome biogenesis in eukaryotes	ko03008	14	186	206	8417	c38156.graph_c0;c44123.graph_c0;c44351.graph_c0;c44436.graph_c0;c44900.graph_c0;c56099.graph_c0;c68439.graph_c0;c70102.graph_c0;c71926.graph_c0;c86393.graph_c0;c89011.graph_c0;c91460.graph_c1;c92800.graph_c0;c93139.graph_c0	K07936+K13288+K14538+K14565+K14570+K03097+K06943+K12845+K14290+K14554+K14564+K14552+K14550+K14563
Spliceosome	ko03040	14	409	206	8417	c38171.graph_c0;c38456.graph_c0;c55232.graph_c0;c61871.graph_c1;c64878.graph_c0;c66412.graph_c0;c70102.graph_c0;c70115.graph_c0;c70352.graph_c0;c77726.graph_c0;c79401.graph_c0;c81768.graph_c0;c84565.graph_c0;c92785.graph_c1	K03283+K12856+K12891+K12823+K12896+K12839+K12845+K12840+K12825+K12897+K12837+K12831+K12900+K12822
Citrate cycle (TCA cycle)	ko00020	10	156	206	8417	c38348.graph_c0;c38448.graph_c0;c44473.graph_c0;c46235.graph_c0;c54646.graph_c0;c62596.graph_c0;c62849.graph_c0;c65576.graph_c0;c65919.graph_c0;c93351.graph_c0	K00161+K00658+K01647+K01679+K00030+K01681+K01900+K00031+K00164+K01899
Biosynthesis of amino acids	ko01230	10	455	206	8417	c38218.graph_c0;c44473.graph_c0;c54616.graph_c0;c54646.graph_c0;c56131.graph_c0;c61983.graph_c0;c62596.graph_c0;c65576.graph_c0;c81295.graph_c1;c93623.graph_c0	K01834+K01647+K00948+K00030+K00850+K00500+K01681+K00031+K00815+K00948
Starch and sucrose metabolism	ko00500	9	319	206	8417	c54521.graph_c0;c68395.graph_c0;c72260.graph_c0;c76915.graph_c0;c80751.graph_c1;c88832.graph_c0;c89588.graph_c0;c89725.graph_c0;c91730.graph_c0	K00844+K16055+K00688+K00688+K00963+K01177+K00688+K00975+K00688
Plant-pathogen interaction	ko04626	9	219	206	8417	c38175.graph_c0;c38356.graph_c0;c38482.graph_c0;c43614.graph_c0;c75997.graph_c0;c85844.graph_c0;c86572.graph_c1;c89023.graph_c0;c89547.graph_c0	K09487+K02183+K13459+K13448+K04079+K13412+K13412+K18835+K09487
Proteasome	ko03050	7	120	206	8417	c38434.graph_c0;c54687.graph_c0;c61459.graph_c1;c76644.graph_c0;c80207.graph_c0;c93235.graph_c0;c93315.graph_c0	K03062+K03035+K02730+K02725+K03036+K02732+K03032
Galactose metabolism	ko00052	7	123	206	8417	c54521.graph_c0;c56131.graph_c0;c58962.graph_c0;c72044.graph_c0;c80751.graph_c1;c82298.graph_c1;c86572.graph_c0	K00844+K00850+K01784+K06617+K00963+K00011+K12309
Purine metabolism	ko00230	6	316	206	8417	c38352.graph_c0;c54616.graph_c0;c55081.graph_c0;c59855.graph_c0;c78380.graph_c0;c93623.graph_c0	K12304+K00948+K10808+K03006+K01939+K00948
RNA degradation	ko03018	6	219	206	8417	c38214.graph_c0;c44068.graph_c0;c56131.graph_c0;c69934.graph_c0;c70538.graph_c0;c85847.graph_c0	K12605+K04077+K00850+K12614+K12604+K12590
Glutathione metabolism	ko00480	6	164	206	8417	c43687.graph_c0;c51379.graph_c0;c55081.graph_c0;c61655.graph_c0;c65576.graph_c0;c67152.graph_c0	K00432+K01581+K10808+K04097+K00031+K11140
Phenylalanine metabolism	ko00360	5	62	206	8417	c38140.graph_c0;c61983.graph_c0;c79463.graph_c1;c81295.graph_c1;c92961.graph_c1	K00074+K00500+K00276+K00815+K00276
Amino sugar and nucleotide sugar metabolism	ko00520	5	221	206	8417	c54521.graph_c0;c58962.graph_c0;c66457.graph_c0;c80751.graph_c1;c89725.graph_c0	K00844+K01784+K01183+K00963+K00975
Glycolysis / Gluconeogenesis	ko00010	5	266	206	8417	c38218.graph_c0;c38348.graph_c0;c54521.graph_c0;c56131.graph_c0;c84851.graph_c0	K01834+K00161+K00844+K00850+K00001
Tyrosine metabolism	ko00350	4	62	206	8417	c79463.graph_c1;c81295.graph_c1;c84851.graph_c0;c92961.graph_c1	K00276+K00815+K00001+K00276
2-Oxocarboxylic acid metabolism	ko01210	4	108	206	8417	c44473.graph_c0;c54646.graph_c0;c62596.graph_c0;c65576.graph_c0	K01647+K00030+K01681+K00031
Pyrimidine metabolism	ko00240	4	234	206	8417	c38150.graph_c0;c38352.graph_c0;c55081.graph_c0;c59855.graph_c0	K13800+K12304+K10808+K03006
Pyruvate metabolism	ko00620	4	226	206	8417	c38348.graph_c0;c46235.graph_c0;c71780.graph_c0;c80164.graph_c1	K00161+K01679+K01595+K00029
Alanine, aspartate and glutamate metabolism	ko00250	4	140	206	8417	c62222.graph_c0;c62534.graph_c1;c68057.graph_c0;c78380.graph_c0	K01953+K13524+K00261+K01939
Plant hormone signal transduction	ko04075	4	331	206	8417	c76569.graph_c0;c80622.graph_c0;c83944.graph_c0;c87915.graph_c0	K14496+K14497+K14497+K14514
alpha-Linolenic acid metabolism	ko00592	3	65	206	8417	c74270.graph_c0;c82538.graph_c0;c91229.graph_c0	K00454+K08241+K00454
Propanoate metabolism	ko00640	3	86	206	8417	c62534.graph_c1;c62849.graph_c0;c93351.graph_c0	K13524+K01900+K01899
Phosphatidylinositol signaling system	ko04070	3	123	206	8417	c38356.graph_c0;c66243.graph_c0;c81956.graph_c0	K02183+K00901+K05857
Tropane, piperidine and pyridine alkaloid biosynthesis	ko00960	3	32	206	8417	c79463.graph_c1;c81295.graph_c1;c92961.graph_c1	K00276+K00815+K00276
Phagosome	ko04145	3	178	206	8417	c44556.graph_c0;c62719.graph_c0;c93196.graph_c0	K02149+K10956+K02147
Fatty acid metabolism	ko01212	3	188	206	8417	c43183.graph_c0;c73808.graph_c0;c92960.graph_c0	K00665+K10258+K00665
beta-Alanine metabolism	ko00410	3	87	206	8417	c62534.graph_c1;c79463.graph_c1;c92961.graph_c1	K13524+K00276+K00276
Butanoate metabolism	ko00650	3	66	206	8417	c38140.graph_c0;c61672.graph_c0;c62534.graph_c1	K00074+K01640+K13524
mRNA surveillance pathway	ko03015	3	250	206	8417	c53042.graph_c0;c61890.graph_c0;c69307.graph_c0	K04382+K14411+K14411
Glycerophospholipid metabolism	ko00564	3	143	206	8417	c66243.graph_c0;c76127.graph_c0;c83540.graph_c0	K00901+K00111+K06130
Isoquinoline alkaloid biosynthesis	ko00950	3	35	206	8417	c79463.graph_c1;c81295.graph_c1;c92961.graph_c1	K00276+K00815+K00276
Glycine, serine and threonine metabolism	ko00260	3	150	206	8417	c38218.graph_c0;c79463.graph_c1;c92961.graph_c1	K01834+K00276+K00276
Fructose and mannose metabolism	ko00051	3	113	206	8417	c54521.graph_c0;c56131.graph_c0;c82298.graph_c1	K00844+K00850+K00011
Protein export	ko03060	3	96	206	8417	c43529.graph_c0;c62719.graph_c0;c81997.graph_c0	K13431+K10956+K09490
Pentose phosphate pathway	ko00030	3	133	206	8417	c54616.graph_c0;c56131.graph_c0;c93623.graph_c0	K00948+K00850+K00948
Circadian rhythm - plant	ko04712	3	74	206	8417	c56099.graph_c0;c68351.graph_c0;c91600.graph_c0	K03097+K10143+K12127
Carbon fixation in photosynthetic organisms	ko00710	2	210	206	8417	c71780.graph_c0;c80164.graph_c1	K01595+K00029
Lysine degradation	ko00310	2	87	206	8417	c38448.graph_c0;c65919.graph_c0	K00658+K00164
Glycosaminoglycan degradation	ko00531	2	25	206	8417	c73534.graph_c0;c86572.graph_c0	K10532+K12309
Other glycan degradation	ko00511	2	37	206	8417	c72074.graph_c0;c86572.graph_c0	K01191+K12309
Phenylalanine, tyrosine and tryptophan biosynthesis	ko00400	2	61	206	8417	c61983.graph_c0;c81295.graph_c1	K00500+K00815
Fatty acid biosynthesis	ko00061	2	89	206	8417	c43183.graph_c0;c92960.graph_c0	K00665+K00665
Endocytosis	ko04144	2	325	206	8417	c38171.graph_c0;c62810.graph_c1	K03283+K04646
Peroxisome	ko04146	2	181	206	8417	c61672.graph_c0;c65576.graph_c0	K01640+K00031
Ubiquinone and other terpenoid-quinone biosynthesis	ko00130	2	52	206	8417	c64734.graph_c0;c81295.graph_c1	K06134+K00815
Arachidonic acid metabolism	ko00590	2	33	206	8417	c43687.graph_c0;c61655.graph_c0	K00432+K04097
Pentose and glucuronate interconversions	ko00040	2	121	206	8417	c80751.graph_c1;c82298.graph_c1	K00963+K00011
Cysteine and methionine metabolism	ko00270	2	197	206	8417	c54586.graph_c0;c81295.graph_c1	K01251+K00815
Linoleic acid metabolism	ko00591	2	22	206	8417	c74270.graph_c0;c91229.graph_c0	K00454+K00454
Terpenoid backbone biosynthesis	ko00900	2	106	206	8417	c77946.graph_c1;c93371.graph_c0	K05356+K14066
Glyoxylate and dicarboxylate metabolism	ko00630	2	215	206	8417	c44473.graph_c0;c62596.graph_c0	K01647+K01681
Valine, leucine and isoleucine degradation	ko00280	2	126	206	8417	c61672.graph_c0;c62534.graph_c1	K01640+K13524
Ubiquitin mediated proteolysis	ko04120	2	265	206	8417	c68351.graph_c0;c84957.graph_c1	K10143+K10577
Glycerolipid metabolism	ko00561	2	113	206	8417	c66243.graph_c0;c82298.graph_c1	K00901+K00011
Inositol phosphate metabolism	ko00562	1	125	206	8417	c81956.graph_c0	K05857
SNARE interactions in vesicular transport	ko04130	1	52	206	8417	c92290.graph_c1	K08486
Synthesis and degradation of ketone bodies	ko00072	1	26	206	8417	c61672.graph_c0	K01640
Sphingolipid metabolism	ko00600	1	49	206	8417	c86572.graph_c0	K12309
Diterpenoid biosynthesis	ko00904	1	26	206	8417	c83948.graph_c0	K04125
AGE-RAGE signaling pathway in diabetic complications	ko04933	1	28	206	8417	c81956.graph_c0	K05857
Base excision repair	ko03410	1	68	206	8417	c78953.graph_c0	K01246
Glycosphingolipid biosynthesis - ganglio series	ko00604	1	18	206	8417	c86572.graph_c0	K12309
Carotenoid biosynthesis	ko00906	1	56	206	8417	c83977.graph_c0	K09843
Nucleotide excision repair	ko03420	1	110	206	8417	c64947.graph_c0	K10839
Phenylpropanoid biosynthesis	ko00940	1	178	206	8417	c79700.graph_c0	K00430
Tryptophan metabolism	ko00380	1	84	206	8417	c65919.graph_c0	K00164
Arginine biosynthesis	ko00220	1	73	206	8417	c68057.graph_c0	K00261
Fatty acid degradation	ko00071	1	116	206	8417	c84851.graph_c0	K00001
Aminoacyl-tRNA biosynthesis	ko00970	1	127	206	8417	c78132.graph_c0	K01881
Nitrogen metabolism	ko00910	1	73	206	8417	c68057.graph_c0	K00261
Biosynthesis of unsaturated fatty acids	ko01040	1	80	206	8417	c73808.graph_c0	K10258
Porphyrin and chlorophyll metabolism	ko00860	1	92	206	8417	c82675.graph_c0	K13606
Other types of O-glycan biosynthesis	ko00514	1	13	206	8417	c62225.graph_c0	K09667
ABC transporters	ko02010	1	53	206	8417	c92169.graph_c0	K05658
Fatty acid elongation	ko00062	1	56	206	8417	c73808.graph_c0	K10258
N-Glycan biosynthesis	ko00510	1	93	206	8417	c51163.graph_c0	K12666
Ascorbate and aldarate metabolism	ko00053	1	92	206	8417	c82840.graph_c0	K08232
Sulfur metabolism	ko00920	1	61	206	8417	c55052.graph_c0	K08738
Arginine and proline metabolism	ko00330	1	102	206	8417	c51379.graph_c0	K01581
RNA polymerase	ko03020	1	80	206	8417	c59855.graph_c0	K03006
Brassinosteroid biosynthesis	ko00905	1	12	206	8417	c86127.graph_c0	K15639
