# Supplementary material for: Investigation of an Antioxidative System for Salinity Tolerance in Oenanthe javanica
Source: Antioxidants (Basel). 2020 Oct 1;9(10):940. doi: 10.3390/antiox9100940 (PMC7601823; doi:10.3390/antiox9100940)
Supplement: Supplementary file 1 [file antioxidants-09-00940-s001.zip › Supplementary table 7 TFs in both cultivars.xlsx]

## Sheet: TFs in V11E0022 
#ID	FDR	log2FC	regulated	COG_class	COG_class_annotation	GO_annotation	KEGG_annotation	KOG_class	KOG_class_annotation	Pfam_annotation	Swissprot_annotation	eggNOG_class	eggNOG_class_annotation	nr_annotation
ERF
c86095.graph_c0	0.000199027	2.21348	up	--	--	Biological Process: response to ethylene (GO:0009723);; Biological Process: response to auxin (GO:0009733);; Biological Process: hormone-mediated signaling pathway (GO:0009755);;	K13434|5.33509e-31|jcu:105638678|K13434 pathogenesis-related genes transcriptional activator PTI6 | (RefSeq) pathogenesis-related genes transcriptional activator PTI6-like	--	--	AP2 domain	Pathogenesis-related genes transcriptional activator PTI6 OS=Solanum lycopersicum OX=4081 GN=PTI6 PE=2 SV=1	K	Transcription	PREDICTED: pathogenesis-related genes transcriptional activator PTI6-like [Daucus carota subsp. sativus]
c78286.graph_c3	2.20893e-08	1.64568	up	--	--	Molecular Function: DNA binding (GO:0003677);; Molecular Function: transcription factor activity, sequence-specific DNA binding (GO:0003700);; Cellular Component: nucleus (GO:0005634);; Biological Process: regulation of transcription, DNA-templated (GO:0006355);;	K09286|1.40813e-61|sind:105159140|K09286 EREBP-like factor | (RefSeq) ethylene-responsive transcription factor ERF008-like	--	--	AP2 domain	Ethylene-responsive transcription factor RAP2-1 OS=Arabidopsis thaliana OX=3702 GN=RAP2-1 PE=2 SV=1	K	Transcription	hypothetical protein CDL12_01102 [Handroanthus impetiginosus]
c78869.graph_c0	0.000618971	-1.61299	down	--	--	--	--	--	--	AP2 domain	Ethylene-responsive transcription factor 13 OS=Arabidopsis thaliana OX=3702 GN=ERF13 PE=2 SV=2	--	--	PREDICTED: ethylene-responsive transcription factor 2-like [Daucus carota subsp. sativus]
c85770.graph_c0	3.88628e-17	-1.99234	down	--	--	Biological Process: transcription, DNA-templated (GO:0006351);;	--	--	--	AP2 domain	Ethylene-responsive transcription factor ERF061 OS=Arabidopsis thaliana OX=3702 GN=ERF061 PE=2 SV=1	K	Transcription	PREDICTED: ethylene-responsive transcription factor ERF061 [Daucus carota subsp. sativus]
c85419.graph_c0	0.00101636	-2.3537	down	--	--	Molecular Function: DNA binding (GO:0003677);; Molecular Function: transcription factor activity, sequence-specific DNA binding (GO:0003700);; Cellular Component: nucleus (GO:0005634);; Biological Process: regulation of transcription, DNA-templated (GO:0006355);; Biological Process: multicellular organism development (GO:0007275);;	K09284|2.79619e-84|vvi:100246815|K09284 AP2-like factor, euAP2 lineage | (RefSeq) ethylene-responsive transcription factor RAP2-7	--	--	AP2 domain	Floral homeotic protein APETALA 2 OS=Arabidopsis thaliana OX=3702 GN=AP2 PE=1 SV=1	K	Transcription	PREDICTED: AP2-like ethylene-responsive transcription factor TOE3 [Daucus carota subsp. sativus]
c79047.graph_c0	0.000422387	-3.38628	down	--	--	Biological Process: transcription, DNA-templated (GO:0006351);;	--	--	--	AP2 domain	Ethylene-responsive transcription factor WRI1 OS=Arabidopsis thaliana OX=3702 GN=WRI1 PE=2 SV=1	K	Transcription	PREDICTED: AP2-like ethylene-responsive transcription factor At1g16060 [Daucus carota subsp. sativus]
bZIP
c79677.graph_c0	2.58421e-08	3.67746	up	--	--	--	--	--	--	bZIP transcription factor	Transcription factor HBP-1a OS=Triticum aestivum OX=4565 PE=2 SV=1	S	Function unknown	hypothetical protein DCAR_020766 [Daucus carota subsp. sativus]
c83804.graph_c0	0.000675924	1.63022	up	--	--	Molecular Function: transcription factor activity, sequence-specific DNA binding (GO:0003700);; Biological Process: regulation of transcription, DNA-templated (GO:0006355);; Molecular Function: sequence-specific DNA binding (GO:0043565);;	K14431|7.98693e-145|tcc:TCM_001212|K14431 transcription factor TGA | (RefSeq) BZIP transcription factor family protein isoform 1	--	--	Seed dormancy control;; bZIP transcription factor;; Basic region leucine zipper	TGACG-sequence-specific DNA-binding protein TGA-1A OS=Nicotiana tabacum OX=4097 GN=TGA1A PE=1 SV=1	K	Transcription	PREDICTED: TGACG-sequence-specific DNA-binding protein TGA-1A-like [Daucus carota subsp. sativus]
c71769.graph_c0	2.13011e-09	1.56591	up	--	--	Molecular Function: binding (GO:0005488);;	--	--	--	Basic leucine-zipper C terminal	Basic leucine zipper 9 OS=Arabidopsis thaliana OX=3702 GN=BZIP9 PE=1 SV=1	K	Transcription	PREDICTED: basic leucine zipper 9-like [Daucus carota subsp. sativus]
c82269.graph_c0	0.00105174	1.33098	up	--	--	--	K20557|4.9165e-68|pop:POPTR_0002s07020g|K20557 transcription factor VIP1 | (RefSeq) POPTRDRAFT_411874; hypothetical protein	--	--	bZIP transcription factor;; Basic region leucine zipper	Transcription factor VIP1 OS=Arabidopsis thaliana OX=3702 GN=VIP1 PE=1 SV=1	K	Transcription	PREDICTED: transcription factor VIP1 [Daucus carota subsp. sativus]
c89046.graph_c0	0.000274181	1.22314	up	[T]	Signal transduction mechanisms	Molecular Function: transcription factor activity, sequence-specific DNA binding (GO:0003700);; Biological Process: regulation of transcription, DNA-templated (GO:0006355);; Molecular Function: sequence-specific DNA binding (GO:0043565);;	K14431|2.04954e-160|sind:105170011|K14431 transcription factor TGA | (RefSeq) transcription factor TGA2	--	--	Seed dormancy control;; bZIP transcription factor;; Basic region leucine zipper;; Alpha/beta hydrolase family	Transcription factor TGA9 OS=Arabidopsis thaliana OX=3702 GN=TGA9 PE=1 SV=1	K	Transcription	PREDICTED: transcription factor HBP-1b(c38) [Daucus carota subsp. sativus]
c72446.graph_c1	2.77839e-07	1.21151	up	--	--	--	K14432|7.61696e-57|vvi:100243434|K14432 ABA responsive element binding factor | (RefSeq) ABSCISIC ACID-INSENSITIVE 5-like protein 5	--	--	bZIP transcription factor;; Basic region leucine zipper	ABSCISIC ACID-INSENSITIVE 5-like protein 6 OS=Arabidopsis thaliana OX=3702 GN=ABF3 PE=1 SV=1	K	Transcription	PREDICTED: ABSCISIC ACID-INSENSITIVE 5-like protein 7 isoform X1 [Daucus carota subsp. sativus]
c90670.graph_c1	1.74881e-07	1.20137	up	--	--	--	K14432|9.3934e-108|tcc:TCM_007074|K14432 ABA responsive element binding factor | (RefSeq) Abscisic acid responsive element-binding factor 1, putative isoform 1	--	--	bZIP transcription factor;; Basic region leucine zipper	ABSCISIC ACID-INSENSITIVE 5-like protein 5 OS=Arabidopsis thaliana OX=3702 GN=ABF2 PE=1 SV=1	K	Transcription	PREDICTED: ABSCISIC ACID-INSENSITIVE 5-like protein 7 [Daucus carota subsp. sativus]
c84723.graph_c1	4.29961e-05	-1.05326	down	--	--	Molecular Function: transcription factor activity, sequence-specific DNA binding (GO:0003700);; Biological Process: regulation of transcription, DNA-templated (GO:0006355);; Molecular Function: sequence-specific DNA binding (GO:0043565);;	--	--	--	bZIP transcription factor;; Basic region leucine zipper	bZIP transcription factor 53 OS=Arabidopsis thaliana OX=3702 GN=BZIP53 PE=1 SV=1	K	Transcription	PREDICTED: bZIP transcription factor 53-like [Daucus carota subsp. sativus]
c83971.graph_c0	0.0029963	-2.96721	down	--	--	--	--	--	--	bZIP transcription factor;; Basic region leucine zipper	Basic leucine zipper 61 OS=Arabidopsis thaliana OX=3702 GN=BZIP61 PE=1 SV=1	K	Transcription	PREDICTED: basic leucine zipper 61-like [Daucus carota subsp. sativus]
c86731.graph_c0	7.72275e-12	-4.47916	down	--	--	Molecular Function: transcription factor activity, sequence-specific DNA binding (GO:0003700);; Biological Process: regulation of transcription, DNA-templated (GO:0006355);; Molecular Function: sequence-specific DNA binding (GO:0043565);;	--	--	--	--	Basic leucine zipper 61 OS=Arabidopsis thaliana OX=3702 GN=BZIP61 PE=1 SV=1	K	Transcription	PREDICTED: basic leucine zipper 61-like [Daucus carota subsp. sativus]
BHLH
c73927.graph_c0	3.45669e-06	3.90512	up	--	--	--	--	--	--	Helix-loop-helix DNA-binding domain	Basic helix-loop-helix protein A OS=Pisum sativum OX=3888 GN=BHLH PE=3 SV=1	K	Transcription	PREDICTED: basic helix-loop-helix protein A isoform X1 [Daucus carota subsp. sativus]
c71309.graph_c0	2.71369e-05	3.79815	up	--	--	Biological Process: anther development (GO:0048653);;	--	--	--	Helix-loop-helix DNA-binding domain;; bHLH-MYC and R2R3-MYB transcription factors N-terminal	Transcription factor ABORTED MICROSPORES OS=Arabidopsis thaliana OX=3702 GN=AMS PE=1 SV=2	K	Transcription	PREDICTED: transcription factor ABORTED MICROSPORES-like isoform X1 [Daucus carota subsp. sativus]
c71539.graph_c0	0.00109377	2.33321	up	--	--	--	--	--	--	--	Transcription factor bHLH162 OS=Arabidopsis thaliana OX=3702 GN=BHLH162 PE=1 SV=1	K	Transcription	PREDICTED: transcription factor bHLH118-like [Daucus carota subsp. sativus]
c85467.graph_c0	0.000152015	2.10337	up	--	--	--	--	--	--	Helix-loop-helix DNA-binding domain	Transcription factor bHLH66 OS=Arabidopsis thaliana OX=3702 GN=BHLH66 PE=1 SV=1	K	Transcription	PREDICTED: transcription factor bHLH66 isoform X1 [Daucus carota subsp. sativus]
c81655.graph_c0	9.31353e-09	1.87023	up	--	--	--	--	--	--	--	Transcription factor bHLH150 OS=Arabidopsis thaliana OX=3702 GN=BHLH150 PE=1 SV=1	K	Transcription	PREDICTED: transcription factor bHLH149-like [Daucus carota subsp. sativus]
c82743.graph_c0	0.000387832	1.59687	up	--	--	--	--	--	--	--	Transcription factor bHLH147 OS=Arabidopsis thaliana OX=3702 GN=BHLH147 PE=1 SV=1	K	Transcription	PREDICTED: transcription factor bHLH147-like [Daucus carota subsp. sativus]
c76376.graph_c0	0.00115789	1.55705	up	--	--	Molecular Function: RNA polymerase II regulatory region sequence-specific DNA binding (GO:0000977);; Molecular Function: transcription factor activity, sequence-specific DNA binding (GO:0003700);; Biological Process: regulation of transcription from RNA polymerase II promoter (GO:0006357);; Cellular Component: RNA polymerase II transcription factor complex (GO:0090575);;	--	--	--	--	Transcription factor bHLH168 OS=Arabidopsis thaliana OX=3702 GN=BHLH168 PE=3 SV=1	S	Function unknown	hypothetical protein DCAR_026126 [Daucus carota subsp. sativus]
c88038.graph_c0	0.00485212	1.20509	up	--	--	--	--	--	--	--	Transcription factor bHLH104 OS=Arabidopsis thaliana OX=3702 GN=BHLH104 PE=1 SV=1	K	Transcription	PREDICTED: transcription factor bHLH104-like [Daucus carota subsp. sativus]
c89153.graph_c0	1.97574e-06	-1.02029	down	--	--	Molecular Function: DNA binding (GO:0003677);; Biological Process: transcription from RNA polymerase II promoter (GO:0006366);;	--	--	--	Helix-loop-helix DNA-binding domain	Transcription factor bHLH130 OS=Arabidopsis thaliana OX=3702 GN=BHLH130 PE=1 SV=1	K	Transcription	PREDICTED: transcription factor bHLH130 [Daucus carota subsp. sativus]
c87234.graph_c0	0.00497625	-1.05826	down	--	--	Molecular Function: DNA binding (GO:0003677);; Molecular Function: protein dimerization activity (GO:0046983);;	--	--	--	--	Transcription factor bHLH48 OS=Arabidopsis thaliana OX=3702 GN=BHLH48 PE=2 SV=1	K	Transcription	hypothetical protein DCAR_013568 [Daucus carota subsp. sativus]
c86370.graph_c1	0.000565236	-1.06706	down	--	--	--	--	--	--	--	Transcription factor bHLH112 OS=Arabidopsis thaliana OX=3702 GN=BHLH112 PE=1 SV=1	S	Function unknown	PREDICTED: transcription factor bHLH112-like [Daucus carota subsp. sativus]
c87791.graph_c0	0.00494173	-1.41334	down	--	--	--	--	--	--	Helix-loop-helix DNA-binding domain	Transcription factor ABA-INDUCIBLE bHLH-TYPE OS=Arabidopsis thaliana OX=3702 GN=AIB PE=2 SV=2	K	Transcription	PREDICTED: transcription factor bHLH13-like [Daucus carota subsp. sativus]
c86764.graph_c0	0.00113345	-1.87765	down	--	--	--	--	--	--	Helix-loop-helix DNA-binding domain	Transcription factor bHLH62 OS=Arabidopsis thaliana OX=3702 GN=BHLH62 PE=2 SV=1	K	Transcription	PREDICTED: transcription factor bHLH78-like [Daucus carota subsp. sativus]
c90626.graph_c1	9.24792e-11	-1.87848	down	--	--	--	--	--	--	Helix-loop-helix DNA-binding domain	Transcription factor bHLH62 OS=Arabidopsis thaliana OX=3702 GN=BHLH62 PE=2 SV=1	K	Transcription	PREDICTED: transcription factor bHLH62-like [Daucus carota subsp. sativus]
c75921.graph_c0	7.62526e-06	-2.07506	down	--	--	--	--	--	--	--	--	--	--	PREDICTED: transcription factor bHLH130-like isoform X2 [Daucus carota subsp. sativus]
c87186.graph_c0	2.62153e-06	-2.59936	down	--	--	--	--	--	--	Helix-loop-helix DNA-binding domain	Transcription factor bHLH74 OS=Arabidopsis thaliana OX=3702 GN=BHLH74 PE=1 SV=1	K	Transcription	PREDICTED: transcription factor bHLH74 [Daucus carota subsp. sativus]
c85777.graph_c0	3.93005e-06	-2.79142	down	--	--	--	--	--	--	Helix-loop-helix DNA-binding domain	Transcription factor bHLH87 OS=Arabidopsis thaliana OX=3702 GN=BHLH87 PE=1 SV=1	S	Function unknown	PREDICTED: transcription factor bHLH87 [Daucus carota subsp. sativus]
c86593.graph_c0	6.34926e-06	-1.47737	down	--	--	--	K13422|2.30276e-158|vvi:100246135|K13422 transcription factor MYC2 | (RefSeq) transcription factor MYC4	--	--	bHLH-MYC and R2R3-MYB transcription factors N-terminal;; Helix-loop-helix DNA-binding domain	Transcription factor MYC4 OS=Arabidopsis thaliana OX=3702 GN=MYC4 PE=1 SV=1	S	Function unknown	hypothetical protein DCAR_006548 [Daucus carota subsp. sativus]
c92662.graph_c0	6.28753e-05	-1.48643	down	[L]	Replication, recombination and repair	Molecular Function: protein serine/threonine kinase activity (GO:0004674);; Cellular Component: cytosol (GO:0005829);; Biological Process: protein phosphorylation (GO:0006468);; Biological Process: intracellular signal transduction (GO:0035556);;	--	--	--	bHLH-MYC and R2R3-MYB transcription factors N-terminal;; Methyladenine glycosylase	Protein RICE SALT SENSITIVE 3 OS=Oryza sativa subsp. japonica OX=39947 GN=RSS3 PE=1 SV=1	S	Function unknown	PREDICTED: uncharacterized protein LOC108214823 [Daucus carota subsp. sativus]
NAC
c79379.graph_c0	4.88003e-09	2.15279	up	--	--	Molecular Function: DNA binding (GO:0003677);; Cellular Component: nucleus (GO:0005634);; Biological Process: regulation of transcription, DNA-templated (GO:0006355);;	--	--	--	No apical meristem (NAM) protein	NAC domain-containing protein 100 OS=Arabidopsis thaliana OX=3702 GN=NAC100 PE=2 SV=1	S	Function unknown	PREDICTED: NAC domain-containing protein 100-like [Daucus carota subsp. sativus]
c90285.graph_c1	0.00685677	1.23263	up	--	--	Molecular Function: DNA binding (GO:0003677);; Cellular Component: nucleus (GO:0005634);; Biological Process: regulation of transcription, DNA-templated (GO:0006355);; Cellular Component: integral component of membrane (GO:0016021);;	--	--	--	No apical meristem (NAM) protein	NAC domain-containing protein 78 OS=Arabidopsis thaliana OX=3702 GN=NAC078 PE=2 SV=2	S	Function unknown	PREDICTED: NAC domain-containing protein 53-like isoform X2 [Daucus carota subsp. sativus]
c86143.graph_c0	3.50519e-06	1.20038	up	--	--	Biological Process: transcription, DNA-templated (GO:0006351);;	--	--	--	--	NAC domain containing protein 52 OS=Arabidopsis thaliana OX=3702 GN=NAC052 PE=1 SV=1	S	Function unknown	PREDICTED: NAC domain-containing protein 78 isoform X2 [Daucus carota subsp. sativus]
c87495.graph_c0	9.94866e-10	-1.71909	down	--	--	--	--	--	--	No apical meristem (NAM) protein;; No apical meristem (NAM) protein	NAC domain-containing protein 35 OS=Arabidopsis thaliana OX=3702 GN=NAC035 PE=1 SV=2	S	Function unknown	PREDICTED: transcription factor JUNGBRUNNEN 1-like [Daucus carota subsp. sativus]
WRKY
c86734.graph_c0	1.70595e-06	1.60339	up	--	--	--	--	--	--	WRKY DNA -binding domain	Probable WRKY transcription factor 3 OS=Arabidopsis thaliana OX=3702 GN=WRKY3 PE=2 SV=1	K	Transcription	hypothetical protein DCAR_007177 [Daucus carota subsp. sativus]
c92403.graph_c0	3.01321e-05	1.39038	up	--	--	Biological Process: obsolete protein import into nucleus, docking (GO:0000059);; Biological Process: protein import into nucleus, translocation (GO:0000060);; Cellular Component: cytosol (GO:0005829);; Biological Process: NLS-bearing protein import into nucleus (GO:0006607);; Biological Process: ribosomal protein import into nucleus (GO:0006610);; Molecular Function: nuclear localization sequence…	K20221|0|vvi:100253220|K20221 importin-4 | (RefSeq) importin-4	[YU]	--	HEAT repeats;; HEAT repeat;; HEAT-like repeat;; Importin-beta N-terminal domain;; Vacuolar 14 Fab1-binding region;; non-SMC mitotic condensation complex subunit 1;; RNAPII transcription regulator C-terminal;; Domain of unknown function (DUF3385);; Interferon-related developmental regulator (IFRD);; Parkin co-regulated protein;; WRKY DNA -binding domain	Probable WRKY transcription factor 23 OS=Arabidopsis thaliana OX=3702 GN=WRKY23 PE=2 SV=1	U	Intracellular trafficking, secretion, and vesicular transport	PREDICTED: importin-4 [Daucus carota subsp. sativus]
c89655.graph_c0	0.000118733	1.1036	up	--	--	Molecular Function: DNA binding (GO:0003677);;	--	--	--	WRKY DNA -binding domain;; Plant zinc cluster domain	Probable WRKY transcription factor 7 OS=Arabidopsis thaliana OX=3702 GN=WRKY7 PE=1 SV=1	K	Transcription	PREDICTED: probable WRKY transcription factor 15 isoform X2 [Daucus carota subsp. sativus]
c86570.graph_c0	0.0095772	-1.4417	down	--	--	--	--	--	--	WRKY DNA -binding domain	Probable WRKY transcription factor 30 OS=Arabidopsis thaliana OX=3702 GN=WRKY30 PE=2 SV=1	K	Transcription	PREDICTED: probable WRKY transcription factor 30 [Daucus carota subsp. sativus]
c79834.graph_c2	0.000422387	-1.52958	down	--	--	Molecular Function: transcription factor activity, sequence-specific DNA binding (GO:0003700);; Biological Process: regulation of transcription, DNA-templated (GO:0006355);; Molecular Function: sequence-specific DNA binding (GO:0043565);;	--	--	--	--	Probable WRKY transcription factor 40 OS=Arabidopsis thaliana OX=3702 GN=WRKY40 PE=1 SV=1	K	Transcription	transcription factor WRKY4 [Petroselinum crispum]
c73007.graph_c0	0.00847111	-2.61485	down	--	--	--	--	--	--	--	Probable WRKY transcription factor 61 OS=Arabidopsis thaliana OX=3702 GN=WRKY61 PE=2 SV=1	K	Transcription	PREDICTED: probable WRKY transcription factor 61 [Daucus carota subsp. sativus]
MYB
c81261.graph_c1	4.84752e-09	3.10601	up	--	--	--	K09422|6.3664e-70|aip:107613266|K09422 myb proto-oncogene protein, plant | (RefSeq) transcription factor MYB48	[K]	Transcription	Myb-like DNA-binding domain;; Myb-like DNA-binding domain;; Myb-like DNA-binding domain	Transcription factor MYB48 OS=Arabidopsis thaliana OX=3702 GN=MYB48 PE=2 SV=1	K	Transcription	PREDICTED: transcription factor MYB59 [Daucus carota subsp. sativus]
c76821.graph_c0	0.00355972	2.85615	up	--	--	--	K09422|4.74672e-90|gra:105800661|K09422 myb proto-oncogene protein, plant | (RefSeq) myb-related protein 305-like	[K]	Transcription	Myb-like DNA-binding domain;; Myb-like DNA-binding domain	Transcription factor MYB2 OS=Oryza sativa subsp. japonica OX=39947 GN=MYB2 PE=2 SV=1	K	Transcription	PREDICTED: transcription factor MYB24-like [Daucus carota subsp. sativus]
c71882.graph_c0	0.00724555	2.33549	up	--	--	Molecular Function: DNA binding (GO:0003677);;	K09422|1.31191e-17|pvu:PHAVU_006G064600g|K09422 myb proto-oncogene protein, plant | (RefSeq) hypothetical protein	[K]	Transcription	Myb-like DNA-binding domain;; Myb-like DNA-binding domain;; Myb-like DNA-binding domain	Transcription factor MYB119 OS=Arabidopsis thaliana OX=3702 GN=MYB119 PE=2 SV=1	K	Transcription	myb-like protein Q [Arabidopsis lyrata subsp. lyrata]
c83141.graph_c0	0.00738013	1.45694	up	--	--	--	K09422|1.72485e-110|vra:106778107|K09422 myb proto-oncogene protein, plant | (RefSeq) transcription factor MYB44-like	[K]	Transcription	Myb-like DNA-binding domain;; Myb-like DNA-binding domain	Transcription factor MYB73 OS=Arabidopsis thaliana OX=3702 GN=MYB73 PE=1 SV=1	K	Transcription	PREDICTED: transcription factor MYB44 [Daucus carota subsp. sativus]
c85128.graph_c0	4.66118e-06	-1.23067	down	--	--	--	K09422|1.32731e-66|sind:105177270|K09422 myb proto-oncogene protein, plant | (RefSeq) myb-related protein 306-like	[K]	Transcription	Myb-like DNA-binding domain;; Myb-like DNA-binding domain	Transcription factor MYB106 OS=Arabidopsis thaliana OX=3702 GN=MYB106 PE=2 SV=1	K	Transcription	PREDICTED: protein ODORANT1-like [Daucus carota subsp. sativus]
c86802.graph_c0	6.2682e-07	1.67934	up	--	--	Molecular Function: DNA binding (GO:0003677);; Cellular Component: nucleus (GO:0005634);; Biological Process: regulation of transcription, DNA-templated (GO:0006355);;	--	[O]	Posttranslational modification, protein turnover, chaperones	Myb-like DNA-binding domain;; Myb-like DNA-binding domain	Transcription factor SRM1 OS=Arabidopsis thaliana OX=3702 GN=SRM1 PE=1 SV=1	K	Transcription	PREDICTED: transcription factor DIVARICATA-like isoform X1 [Daucus carota subsp. sativus]
c87038.graph_c0	2.12924e-05	-1.39117	down	--	--	Molecular Function: DNA binding (GO:0003677);;	K09422|2.23733e-65|egu:105040495|K09422 myb proto-oncogene protein, plant | (RefSeq) transcription factor RAX2	[K]	Transcription	Myb-like DNA-binding domain;; Myb-like DNA-binding domain;; Snf7	Transcription factor RAX2 OS=Arabidopsis thaliana OX=3702 GN=RAX2 PE=1 SV=1	K	Transcription	PREDICTED: transcription factor RAX1-like [Daucus carota subsp. sativus]
c78448.graph_c0	2.72993e-08	-1.51584	down	--	--	--	K09422|4.72777e-100|vvi:100233072|K09422 myb proto-oncogene protein, plant | (RefSeq) MYB60; R2R3 MYB60 transcription factor	[K]	Transcription	Myb-like DNA-binding domain;; Myb-like DNA-binding domain	Myb-related protein 306 OS=Antirrhinum majus OX=4151 GN=MYB306 PE=2 SV=1	K	Transcription	PREDICTED: myb-related protein 306-like [Daucus carota subsp. sativus]
c90151.graph_c1	1.54512e-06	-1.51951	down	--	--	Molecular Function: DNA binding (GO:0003677);; Cellular Component: nucleus (GO:0005634);; Biological Process: regulation of transcription, DNA-templated (GO:0006355);;	--	[O]	Posttranslational modification, protein turnover, chaperones	Myb-like DNA-binding domain	Transcription factor MYBS1 OS=Oryza sativa subsp. japonica OX=39947 GN=MYBS1 PE=1 SV=1	K	Transcription	PREDICTED: transcription factor DIVARICATA [Daucus carota subsp. sativus]
c80617.graph_c0	0.000430774	-2.06286	down	--	--	Molecular Function: binding (GO:0005488);; Biological Process: regulation of transcription, DNA-templated (GO:0006355);; Biological Process: histone acetylation (GO:0016573);;	--	--	--	--	Transcription factor MYBS2 OS=Oryza sativa subsp. japonica OX=39947 GN=MYBS2 PE=2 SV=1	K	Transcription	PREDICTED: myb-like protein J [Daucus carota subsp. sativus]
c87741.graph_c1	5.80985e-12	-2.1568	down	--	--	Molecular Function: DNA binding (GO:0003677);; Cellular Component: nucleus (GO:0005634);; Biological Process: regulation of transcription, DNA-templated (GO:0006355);;	--	[O]	Posttranslational modification, protein turnover, chaperones	Myb-like DNA-binding domain;; Myb-like DNA-binding domain	Transcription factor DIVARICATA OS=Antirrhinum majus OX=4151 GN=DIVARICATA PE=2 SV=1	K	Transcription	PREDICTED: transcription factor DIVARICATA-like [Daucus carota subsp. sativus]
c79309.graph_c0	0.00325754	-2.80678	down	--	--	--	K09422|4.52672e-49|sind:105169011|K09422 myb proto-oncogene protein, plant | (RefSeq) transcription factor MYB86-like	[K]	Transcription	--	Transcription factor MYB61 OS=Arabidopsis thaliana OX=3702 GN=MYB61 PE=2 SV=1	K	Transcription	PREDICTED: transcription factor MYB86-like [Daucus carota subsp. sativus]
c85716.graph_c0	1.85895e-09	-2.67462	down	--	--	Molecular Function: DNA binding (GO:0003677);; Cellular Component: nucleus (GO:0005634);; Biological Process: transcription, DNA-templated (GO:0006351);; Biological Process: leaf formation (GO:0010338);;	K09422|1.63792e-170|tcc:TCM_021932|K09422 myb proto-oncogene protein, plant | (RefSeq) Myb-like HTH transcriptional regulator family protein isoform 1	[K]	Transcription	Myb-like DNA-binding domain;; Myb-like DNA-binding domain	Transcription factor AS1 OS=Arabidopsis thaliana OX=3702 GN=AS1 PE=1 SV=1	K	Transcription	PREDICTED: transcription factor AS1 [Daucus carota subsp. sativus]
MYB related
c79856.graph_c0	0.00144439	-1.41454	down	--	--	Molecular Function: DNA binding (GO:0003677);; Cellular Component: nucleus (GO:0005634);; Biological Process: regulation of transcription, DNA-templated (GO:0006355);;	--	[O]	Posttranslational modification, protein turnover, chaperones	Myb-like DNA-binding domain	Protein REVEILLE 8 OS=Arabidopsis thaliana OX=3702 GN=RVE8 PE=2 SV=1	K	Transcription	hypothetical protein DCAR_020870 [Daucus carota subsp. sativus]
c76910.graph_c0	1.51593e-14	-5.26237	down	--	--	Molecular Function: DNA binding (GO:0003677);; Cellular Component: nucleus (GO:0005634);;	--	[O]	Posttranslational modification, protein turnover, chaperones	Myb-like DNA-binding domain	Transcription factor RADIALIS OS=Antirrhinum majus OX=4151 GN=RAD PE=1 SV=1	K	Transcription	PREDICTED: protein RADIALIS-like 1 isoform X1 [Daucus carota subsp. sativus]
c82616.graph_c0	6.10787e-31	-5.37905	down	--	--	Molecular Function: DNA binding (GO:0003677);; Cellular Component: nucleus (GO:0005634);;	--	[O]	Posttranslational modification, protein turnover, chaperones	Myb-like DNA-binding domain	Protein RADIALIS-like 1 OS=Arabidopsis thaliana OX=3702 GN=RL1 PE=2 SV=1	K	Transcription	PREDICTED: protein RADIALIS-like 1 [Daucus carota subsp. sativus]
c90521.graph_c1	0.0039599	-1.0925	down	--	--	Biological Process: transcription, DNA-templated (GO:0006351);; Biological Process: regulation of biological process (GO:0050789);;	K12133|3.56145e-119|vvi:100250535|K12133 MYB-related transcription factor LHY | (RefSeq) protein LHY	[O]	Posttranslational modification, protein turnover, chaperones	--	Protein LHY OS=Arabidopsis thaliana OX=3702 GN=LHY PE=1 SV=2	K	Transcription	PREDICTED: protein LHY [Daucus carota subsp. sativus]
G2-like family
c83372.graph_c0	0.00567975	1.29423	up	--	--	Molecular Function: DNA binding (GO:0003677);; Cellular Component: nucleus (GO:0005634);; Biological Process: regulation of transcription, DNA-templated (GO:0006355);;	--	--	--	--	Transcription factor MYBC1 OS=Arabidopsis thaliana OX=3702 GN=MYBC1 PE=1 SV=1	S	Function unknown	PREDICTED: transcription factor PCL1-like [Daucus carota subsp. sativus]
c88659.graph_c0	0.000168277	-1.36599	down	--	--	--	--	--	--	--	Putative Myb family transcription factor At1g14600 OS=Arabidopsis thaliana OX=3702 GN=At1g14600 PE=2 SV=2	--	--	PREDICTED: putative Myb family transcription factor At1g14600 [Daucus carota subsp. sativus]
c81366.graph_c0	1.10369e-09	-3.21827	down	--	--	Molecular Function: DNA binding (GO:0003677);; Cellular Component: nucleus (GO:0005634);; Biological Process: regulation of transcription, DNA-templated (GO:0006355);; Cellular Component: membrane (GO:0016020);;	--	--	--	Myb-like DNA-binding domain	Putative Myb family transcription factor At1g14600 OS=Arabidopsis thaliana OX=3702 GN=At1g14600 PE=2 SV=2	S	Function unknown	PREDICTED: putative Myb family transcription factor At1g14600 [Daucus carota subsp. sativus]
HSF
c85160.graph_c0	7.47018e-12	3.27598	up	--	--	--	K09419|1.86305e-46|cmo:103492645|K09419 heat shock transcription factor, other eukaryote | (RefSeq) heat stress transcription factor A-6b-like	[K]	Transcription	HSF-type DNA-binding	Heat stress transcription factor A-2b OS=Oryza sativa subsp. japonica OX=39947 GN=HSFA2B PE=2 SV=1	K	Transcription	PREDICTED: heat stress transcription factor A-6b-like [Daucus carota subsp. sativus]
c80282.graph_c0	7.10299e-06	1.81864	up	--	--	--	K09419|2.52131e-93|sind:105160500|K09419 heat shock transcription factor, other eukaryote | (RefSeq) heat stress transcription factor B-2a-like	[K]	Transcription	HSF-type DNA-binding	Heat stress transcription factor B-2a OS=Arabidopsis thaliana OX=3702 GN=HSFB2A PE=2 SV=1	K	Transcription	PREDICTED: heat stress transcription factor B-2a-like [Daucus carota subsp. sativus]
c82901.graph_c0	0.00190276	1.258	up	--	--	Molecular Function: DNA binding (GO:0003677);;	K09419|3.26651e-136|vvi:100250580|K09419 heat shock transcription factor, other eukaryote | (RefSeq) heat stress transcription factor A-4b	[K]	Transcription	HSF-type DNA-binding	Heat stress transcription factor A-4b OS=Oryza sativa subsp. japonica OX=39947 GN=HSFA4B PE=2 SV=1	K	Transcription	PREDICTED: heat stress transcription factor A-4b-like [Daucus carota subsp. sativus]
OFP
c80032.graph_c0	4.01324e-07	3.0896	up	--	--	--	--	--	--	Transcriptional repressor, ovate;; DNA-binding domain	Transcription repressor OFP4 OS=Arabidopsis thaliana OX=3702 GN=OFP4 PE=1 SV=1	S	Function unknown	PREDICTED: transcription repressor OFP1-like [Daucus carota subsp. sativus]
c77560.graph_c0	0.00325754	-1.28513	down	--	--	--	--	--	--	Transcriptional repressor, ovate	Transcription repressor OFP13 OS=Arabidopsis thaliana OX=3702 GN=OFP13 PE=1 SV=1	S	Function unknown	PREDICTED: transcription repressor OFP13 [Daucus carota subsp. sativus]
c84806.graph_c0	4.46825e-09	-3.60718	down	--	--	--	--	--	--	Transcriptional repressor, ovate	Transcription repressor OFP13 OS=Arabidopsis thaliana OX=3702 GN=OFP13 PE=1 SV=1	S	Function unknown	PREDICTED: transcription repressor OFP15-like [Daucus carota subsp. sativus]
TCP
c90958.graph_c0	6.58926e-06	-1.31035	down		--	--	--	--	--	TCP family transcription factor	Transcription factor TCP7 OS=Arabidopsis thaliana OX=3702 GN=TCP7 PE=1 SV=1	K	Transcription	PREDICTED: transcription factor TCP7 [Daucus carota subsp. sativus]
c87581.graph_c0	0.000606713	-1.58704	down		--	--	--	--	--	TCP family transcription factor	Transcription factor TCP7 OS=Arabidopsis thaliana OX=3702 GN=TCP7 PE=1 SV=1	K	Transcription	hypothetical protein DCAR_026883 [Daucus carota subsp. sativus]
c91519.graph_c1	6.91121e-14	-2.13939	down		--	--	--	--	--	TCP family transcription factor	Transcription factor TCP3 OS=Arabidopsis thaliana OX=3702 GN=TCP3 PE=1 SV=1	K	Transcription	PREDICTED: transcription factor TCP4 [Daucus carota subsp. sativus]
c86194.graph_c0	1.3354e-05	-2.23806	down	--	--	Biological Process: developmental process (GO:0032502);;	--	--	--	TCP family transcription factor	Transcription factor TCP3 OS=Arabidopsis thaliana OX=3702 GN=TCP3 PE=1 SV=1	K	Transcription	PREDICTED: transcription factor TCP4-like [Daucus carota subsp. sativus]
AP2
c82741.graph_c0	1.78627e-07	-1.47121	down	--	--	Molecular Function: DNA binding (GO:0003677);; Molecular Function: transcription factor activity, sequence-specific DNA binding (GO:0003700);; Cellular Component: nucleus (GO:0005634);; Biological Process: regulation of transcription, DNA-templated (GO:0006355);;	K09287|1.39381e-162|vvi:100262843|K09287 RAV-like factor | (RefSeq) AP2/ERF and B3 domain-containing transcription factor RAV1	--	--	B3 DNA binding domain;; AP2 domain	AP2/ERF and B3 domain-containing transcription repressor TEM1 OS=Arabidopsis thaliana OX=3702 GN=TEM1 PE=1 SV=1	K	Transcription	PREDICTED: AP2/ERF and B3 domain-containing transcription factor RAV1-like [Daucus carota subsp. sativus]
LBD
c79407.graph_c0	2.5876e-06	-1.285	down	--	--	--	--	--	--	Lateral organ boundaries (LOB) domain	LOB domain-containing protein 39 OS=Arabidopsis thaliana OX=3702 GN=LBD39 PE=2 SV=1	S	Function unknown	PREDICTED: LOB domain-containing protein 37-like [Daucus carota subsp. sativus]
AUX/IAA
c83344.graph_c1	0.000720648	-1.03549	down	--	--	Cellular Component: nucleus (GO:0005634);; Biological Process: regulation of transcription, DNA-templated (GO:0006355);; Biological Process: auxin-activated signaling pathway (GO:0009734);;	K14484|7.0927e-48|nnu:104612448|K14484 auxin-responsive protein IAA | (RefSeq) auxin-responsive protein IAA4-like	--	--	AUX/IAA family	Auxin-induced protein 22D OS=Vigna radiata var. radiata OX=3916 GN=AUX22D PE=2 SV=1	K	Transcription	PREDICTED: auxin-induced protein 22D-like [Daucus carota subsp. sativus]
c86434.graph_c0	4.05328e-05	-1.78722	down	--	--	Molecular Function: DNA binding (GO:0003677);; Cellular Component: nucleus (GO:0005634);; Biological Process: regulation of transcription, DNA-templated (GO:0006355);; Biological Process: auxin-activated signaling pathway (GO:0009734);;	K14486|0|sind:105173774|K14486 auxin response factor | (RefSeq) auxin response factor 18-like	--	--	B3 DNA binding domain;; Auxin response factor;; AUX/IAA family	Auxin response factor 18 OS=Arabidopsis thaliana OX=3702 GN=ARF18 PE=1 SV=1	K	Transcription	hypothetical protein DCAR_005400 [Daucus carota subsp. sativus]
c88666.graph_c1	3.61328e-10	-1.96438	down	--	--	Biological Process: transcription, DNA-templated (GO:0006351);; Biological Process: regulation of cellular process (GO:0050794);;	K14484|7.16104e-47|gmx:547949|K14484 auxin-responsive protein IAA | (RefSeq) SLR1; auxin-induced protein ali50	--	--	AUX/IAA family	Auxin-responsive protein IAA14 OS=Arabidopsis thaliana OX=3702 GN=IAA14 PE=1 SV=2	K	Transcription	PREDICTED: auxin-responsive protein IAA7-like [Daucus carota subsp. sativus]
c80793.graph_c0	2.40564e-05	-2.09967	down	--	--	Biological Process: transcription, DNA-templated (GO:0006351);; Biological Process: regulation of cellular process (GO:0050794);;	K14484|3.93939e-33|sind:105158424|K14484 auxin-responsive protein IAA | (RefSeq) auxin-induced protein 22B-like	--	--	AUX/IAA family	Auxin-induced protein 22B OS=Vigna radiata var. radiata OX=3916 GN=AUX22B PE=2 SV=1	K	Transcription	PREDICTED: auxin-responsive protein IAA4-like [Daucus carota subsp. sativus]
c81865.graph_c0	4.7031e-07	-2.39475	down	--	--	Cellular Component: nucleus (GO:0005634);; Biological Process: regulation of transcription, DNA-templated (GO:0006355);; Biological Process: auxin-activated signaling pathway (GO:0009734);;	K14484|2.93653e-93|sind:105158425|K14484 auxin-responsive protein IAA | (RefSeq) auxin-responsive protein IAA14	--	--	AUX/IAA family	Auxin-responsive protein IAA14 OS=Arabidopsis thaliana OX=3702 GN=IAA14 PE=1 SV=2	K	Transcription	PREDICTED: auxin-responsive protein IAA14-like [Daucus carota subsp. sativus]
GRAS
c91516.graph_c0	0.000324137	1.60493	up	--	--	Molecular Function: transcription factor activity, sequence-specific DNA binding (GO:0003700);; Cellular Component: nucleus (GO:0005634);; Biological Process: regulation of transcription, DNA-templated (GO:0006355);; Molecular Function: sequence-specific DNA binding (GO:0043565);;	--	--	--	GRAS domain family	DELLA protein RGL1 OS=Arabidopsis thaliana OX=3702 GN=RGL1 PE=1 SV=1	S	Function unknown	PREDICTED: DELLA protein RGL1-like [Daucus carota subsp. sativus]
c91253.graph_c1	0.000664293	1.24344	up	--	--	Molecular Function: transcription factor activity, sequence-specific DNA binding (GO:0003700);; Cellular Component: nucleus (GO:0005634);; Biological Process: regulation of transcription, DNA-templated (GO:0006355);; Biological Process: cell differentiation (GO:0030154);; Molecular Function: sequence-specific DNA binding (GO:0043565);; Biological Process: regulation of shoot system development (G…	--	--	--	GRAS domain family	Scarecrow-like protein 15 OS=Arabidopsis thaliana OX=3702 GN=SCL15 PE=1 SV=3	K	Transcription	PREDICTED: scarecrow-like protein 15 [Daucus carota subsp. sativus]
c82745.graph_c0	0.00372586	1.03312	up	--	--	Biological Process: regulation of transcription, DNA-templated (GO:0006355);;	--	--	--	GRAS domain family	Scarecrow-like protein 34 OS=Arabidopsis thaliana OX=3702 GN=SCL34 PE=3 SV=1	K	Transcription	PREDICTED: scarecrow-like protein 14 [Daucus carota subsp. sativus]
c86164.graph_c0	0.00599625	-1.14975	down	--	--	Molecular Function: transcription factor activity, sequence-specific DNA binding (GO:0003700);; Cellular Component: nucleus (GO:0005634);; Biological Process: regulation of transcription, DNA-templated (GO:0006355);; Molecular Function: sequence-specific DNA binding (GO:0043565);; Biological Process: leaf development (GO:0048366);; Biological Process: bundle sheath cell fate specification (GO:009…	--	--	--	GRAS domain family	Scarecrow-like protein 23 OS=Arabidopsis thaliana OX=3702 GN=SCL23 PE=1 SV=1	K	Transcription	PREDICTED: scarecrow-like protein 23 [Daucus carota subsp. sativus]
c88994.graph_c0	4.87276e-06	-2.11906	down	--	--	Biological Process: transcription, DNA-templated (GO:0006351);;	K14494|0|pper:PRUPE_ppa003206mg|K14494 DELLA protein | (RefSeq) hypothetical protein	--	--	GRAS domain family;; Transcriptional regulator DELLA protein N terminal	DELLA protein GAI OS=Solanum lycopersicum OX=4081 GN=GAI PE=2 SV=1	K	Transcription	PREDICTED: DELLA protein GAI [Daucus carota subsp. sativus]
c89700.graph_c0	7.14914e-09	-2.14132	down	--	--	Molecular Function: transcription factor activity, sequence-specific DNA binding (GO:0003700);; Molecular Function: signal transducer activity (GO:0004871);; Cellular Component: nucleus (GO:0005634);; Cellular Component: cytoplasm (GO:0005737);; Biological Process: regulation of transcription, DNA-templated (GO:0006355);; Biological Process: signal transduction (GO:0007165);; Biological Process: …	--	--	--	GRAS domain family	Scarecrow-like transcription factor PAT1 OS=Arabidopsis thaliana OX=3702 GN=PAT1 PE=2 SV=1	K	Transcription	PREDICTED: scarecrow-like transcription factor PAT1 [Daucus carota subsp. sativus]
GATA
c85530.graph_c0	0.00376734	-1.11631	down	--	--	Molecular Function: DNA binding (GO:0003677);; Biological Process: transcription, DNA-templated (GO:0006351);;	--	[K]	Transcription	GATA zinc finger	GATA transcription factor 5 OS=Arabidopsis thaliana OX=3702 GN=GATA5 PE=2 SV=1	K	Transcription	PREDICTED: GATA transcription factor 5 [Daucus carota subsp. sativus]
c81931.graph_c0	0.0036939	-1.78826	down	--	--	Molecular Function: transcription factor activity, sequence-specific DNA binding (GO:0003700);; Biological Process: regulation of transcription, DNA-templated (GO:0006355);; Molecular Function: sequence-specific DNA binding (GO:0043565);; Cellular Component: intracellular part (GO:0044424);;	--	[K]	Transcription	GATA zinc finger	GATA transcription factor 12 OS=Arabidopsis thaliana OX=3702 GN=GATA12 PE=2 SV=1	K	Transcription	PREDICTED: GATA transcription factor 12-like [Daucus carota subsp. sativus]
Zinc finger
c87175.graph_c0	3.07714e-27	2.64965	up	--	--	Molecular Function: zinc ion binding (GO:0008270);; Cellular Component: integral component of membrane (GO:0016021);;	--	[S]	Function unknown	Zinc finger, C3HC4 type (RING finger);; Ring finger domain;; Prokaryotic RING finger family 4;; Zinc finger, C3HC4 type (RING finger);; RING-type zinc-finger;; Zinc finger, C3HC4 type (RING finger);; zinc-RING finger domain;; Late embryogenesis abundant protein	ERAD-associated E3 ubiquitin-protein ligase HRD1B OS=Arabidopsis thaliana OX=3702 GN=HRD1B PE=2 SV=1	S	Function unknown	PREDICTED: RING finger and transmembrane domain-containing protein 1-like isoform X1 [Daucus carota subsp. sativus]
c92875.graph_c0	8.98527e-08	1.96255	up	--	--	Molecular Function: binding (GO:0005488);; Biological Process: primary metabolic process (GO:0044238);; Biological Process: cellular macromolecule metabolic process (GO:0044260);; Biological Process: gametophyte development (GO:0048229);;	--	[TZ]	--	BTB/POZ domain;; TAZ zinc finger;; Formin Homology 2 Domain	Formin-like protein 1 OS=Oryza sativa subsp. japonica OX=39947 GN=FH1 PE=2 SV=1	S	Function unknown	hypothetical protein DCAR_023778 [Daucus carota subsp. sativus]
c91703.graph_c1	9.04344e-13	1.73857	up	[G]	Carbohydrate transport and metabolism	Molecular Function: transcription cofactor activity (GO:0003712);; Molecular Function: histone acetyltransferase activity (GO:0004402);; Cellular Component: nucleus (GO:0005634);; Biological Process: regulation of transcription, DNA-templated (GO:0006355);; Molecular Function: zinc ion binding (GO:0008270);; Biological Process: histone acetylation (GO:0016573);;	--	[K]	Transcription	BTB/POZ domain;; TAZ zinc finger;; Carbohydrate phosphorylase	BTB/POZ and TAZ domain-containing protein 4 OS=Arabidopsis thaliana OX=3702 GN=BT4 PE=1 SV=1	S	Function unknown	PREDICTED: BTB/POZ and TAZ domain-containing protein 4 [Daucus carota subsp. sativus]
c73718.graph_c0	0.00422456	1.42272	up	--	--	--	K16285|2.88045e-34|fve:101313019|K16285 RING/U-box domain-containing protein [EC:2.3.2.27] | (RefSeq) probable E3 ubiquitin-protein ligase XERICO	[O]	Posttranslational modification, protein turnover, chaperones	Ring finger domain;; Zinc finger, C3HC4 type (RING finger)	Probable E3 ubiquitin-protein ligase XERICO OS=Arabidopsis thaliana OX=3702 GN=XERICO PE=1 SV=1	O	Posttranslational modification, protein turnover, chaperones	PREDICTED: probable E3 ubiquitin-protein ligase XERICO [Daucus carota subsp. sativus]
c89193.graph_c0	0.00026894	1.34927	up	--	--	--	K17987|1.30272e-170|cic:CICLE_v10024152mg|K17987 next to BRCA1 gene 1 protein | (RefSeq) hypothetical protein	[S]	Function unknown	Ig-like domain from next to BRCA1 gene;; PB1 domain;; Zinc finger, ZZ type	Protein NBR1 homolog OS=Arabidopsis thaliana OX=3702 GN=NBR1 PE=1 SV=1	S	Function unknown	PREDICTED: protein NBR1 homolog [Daucus carota subsp. sativus]
c83521.graph_c1	0.000781233	1.29253	up	--	--	--	K16285|6.8506e-35|spen:107023960|K16285 RING/U-box domain-containing protein [EC:2.3.2.27] | (RefSeq) probable E3 ubiquitin-protein ligase XERICO	[O]	Posttranslational modification, protein turnover, chaperones	Ring finger domain;; RING-H2 zinc finger domain;; RING-like zinc finger;; Zinc finger, C3HC4 type (RING finger);; Zinc finger, C3HC4 type (RING finger);; RING-type zinc-finger;; Anaphase-promoting complex subunit 11 RING-H2 finger;; zinc-RING finger domain;; Zinc finger, C3HC4 type (RING finger)	Probable E3 ubiquitin-protein ligase XERICO OS=Arabidopsis thaliana OX=3702 GN=XERICO PE=1 SV=1	O	Posttranslational modification, protein turnover, chaperones	PREDICTED: probable E3 ubiquitin-protein ligase XERICO [Daucus carota subsp. sativus]
c86245.graph_c0	0.000829865	1.02263	up	--	--	Cellular Component: membrane (GO:0016020);; Molecular Function: metal ion binding (GO:0046872);;	K10666|1.04834e-78|jcu:105639602|K10666 E3 ubiquitin-protein ligase RNF5 [EC:2.3.2.27] | (RefSeq) E3 ubiquitin-protein ligase RNF185-like	[O]	Posttranslational modification, protein turnover, chaperones	Zinc finger, C3HC4 type (RING finger);; Zinc finger, C3HC4 type (RING finger);; Ring finger domain;; Zinc finger, C3HC4 type (RING finger);; RING-type zinc-finger	E3 ubiquitin-protein ligase RMA3 OS=Arabidopsis thaliana OX=3702 GN=RMA3 PE=1 SV=1	O	Posttranslational modification, protein turnover, chaperones	PREDICTED: E3 ubiquitin-protein ligase RNF185-like [Daucus carota subsp. sativus]
c77050.graph_c0	0.0016564	1.01298	up	--	--	Molecular Function: copper ion binding (GO:0005507);; Cellular Component: mitochondrial intermembrane space (GO:0005758);; Biological Process: protein transport (GO:0015031);;	K17781|5.33357e-20|bvg:104892652|K17781 mitochondrial import inner membrane translocase subunit TIM13 | (RefSeq) mitochondrial import inner membrane translocase subunit Tim13	[U]	Intracellular trafficking, secretion, and vesicular transport	Tim10/DDP family zinc finger	Mitochondrial import inner membrane translocase subunit Tim13 OS=Oryza sativa subsp. japonica OX=39947 GN=TIM13 PE=3 SV=2	O	Posttranslational modification, protein turnover, chaperones	PREDICTED: mitochondrial import inner membrane translocase subunit Tim13 [Beta vulgaris subsp. vulgaris]
c89895.graph_c0	0.00117018	-1.06044	down	--	--	--	--	--	--	Dof domain, zinc finger	Cyclic dof factor 3 OS=Arabidopsis thaliana OX=3702 GN=CDF3 PE=1 SV=2	S	Function unknown	PREDICTED: cyclic dof factor 1-like [Daucus carota subsp. sativus]
c93106.graph_c0	3.13461e-06	-1.17926	down	[QV]	Secondary metabolites biosynthesis, transport and catabolism ;; Defense mechanisms	--	K19027|0|vvi:100262933|K19027 zinc finger FYVE domain-containing protein 26 | (RefSeq) protein DDB_G0276689	[R]	General function prediction only	Cytochrome P450	Cytochrome P450 704C1 OS=Pinus taeda OX=3352 GN=CYP704C1 PE=2 SV=1	S	Function unknown	PREDICTED: uncharacterized protein LOC108208758 isoform X1 [Daucus carota subsp. sativus]
c76515.graph_c0	2.3793e-06	-1.47865	down	--	--	Molecular Function: metal ion binding (GO:0046872);;	--	[R]	General function prediction only	Zinc finger C-x8-C-x5-C-x3-H type (and similar)	Zinc finger CCCH domain-containing protein 33 OS=Arabidopsis thaliana OX=3702 GN=ZFN1 PE=1 SV=1	S	Function unknown	PREDICTED: zinc finger CCCH domain-containing protein ZFN-like [Daucus carota subsp. sativus]
c88094.graph_c0	0.00072899	-1.50145	down	--	--	--	K19042|1.48138e-140|jcu:105644618|K19042 E3 ubiquitin-protein ligase BOI and related proteins [EC:2.3.2.27] | (RefSeq) BOI-related E3 ubiquitin-protein ligase 1-like	[O]	Posttranslational modification, protein turnover, chaperones	Zinc finger, C3HC4 type (RING finger)	E3 ubiquitin-protein ligase BOI OS=Arabidopsis thaliana OX=3702 GN=BOI PE=1 SV=1	S	Function unknown	PREDICTED: E3 ubiquitin-protein ligase BOI [Daucus carota subsp. sativus]
c76455.graph_c0	2.69595e-08	-1.51727	down	--	--	Molecular Function: calmodulin binding (GO:0005516);; Cellular Component: nucleus (GO:0005634);; Molecular Function: zinc ion binding (GO:0008270);;	--	--	--	Zinc finger, C3HC4 type (RING finger);; Prokaryotic RING finger family 4;; Zinc finger, C3HC4 type (RING finger);; Zinc finger, C3HC4 type (RING finger)	--	S	Function unknown	PREDICTED: uncharacterized protein LOC108211664 [Daucus carota subsp. sativus]
c83228.graph_c0	0.000140435	-1.55979	down	--	--	Cellular Component: membrane (GO:0016020);; Biological Process: proteasome-mediated ubiquitin-dependent protein catabolic process (GO:0043161);; Molecular Function: metal ion binding (GO:0046872);; Molecular Function: ubiquitin protein ligase activity (GO:0061630);;	--	[O]	Posttranslational modification, protein turnover, chaperones	Ring finger domain;; RING-H2 zinc finger domain;; RING-like zinc finger;; Anaphase-promoting complex subunit 11 RING-H2 finger;; Zinc finger, C3HC4 type (RING finger);; Zinc finger, C3HC4 type (RING finger)	RING-H2 finger protein ATL13 OS=Arabidopsis thaliana OX=3702 GN=ATL13 PE=2 SV=2	O	Posttranslational modification, protein turnover, chaperones	PREDICTED: RING-H2 finger protein ATL13-like [Daucus carota subsp. sativus]
c92541.graph_c0	3.18333e-05	-1.62277	down	[DZ]	Cell cycle control, cell division, chromosome partitioning ;; Cytoskeleton	Molecular Function: metal ion binding (GO:0046872);;	--	--	--	Regulator of chromosome condensation (RCC1) repeat;; Regulator of chromosome condensation (RCC1) repeat;; FYVE zinc finger;; Pleckstrin homology domain;; Transcription factor BRX N-terminal domain;; Transcription factor regulating root and shoot growth via Pin3;; Unstructured region between BRX_N and BRX domain	PH, RCC1 and FYVE domains-containing protein 1 OS=Arabidopsis thaliana OX=3702 GN=PRAF1 PE=1 SV=1	DZ	--	PREDICTED: uncharacterized protein LOC108195904 [Daucus carota subsp. sativus]
c83666.graph_c0	0.00157118	-1.70967	down	--	--	Molecular Function: binding (GO:0005488);;	--	--	--	Zinc finger C-x8-C-x5-C-x3-H type (and similar)	Zinc finger CCCH domain-containing protein 46 OS=Arabidopsis thaliana OX=3702 GN=At3g51950 PE=1 SV=1	S	Function unknown	PREDICTED: zinc finger CCCH domain-containing protein 53-like [Daucus carota subsp. sativus]
c78549.graph_c0	2.80733e-05	-1.78747	down	--	--	--	--	--	--	--	Putative zinc finger protein At1g68190 OS=Arabidopsis thaliana OX=3702 GN=At1g68190 PE=2 SV=1	S	Function unknown	hypothetical protein DCAR_026755 [Daucus carota subsp. sativus]
c92144.graph_c0	2.2597e-06	-1.82822	down	--	--	Biological Process: regulation of cyclin-dependent protein serine/threonine kinase activity (GO:0000079);; Molecular Function: protein kinase binding (GO:0019901);;	--	[R]	General function prediction only	Cyclin;; Cyclin, N-terminal domain;; Zinc finger C-x8-C-x5-C-x3-H type (and similar)	Cyclin-U1-1 OS=Arabidopsis thaliana OX=3702 GN=CYCU1-1 PE=1 SV=1	S	Function unknown	PREDICTED: zinc finger CCCH domain-containing protein 13 isoform X2 [Daucus carota subsp. sativus]
c79598.graph_c0	0.00121918	-2.39221	down	--	--	--	--	--	--	Dof domain, zinc finger	Dof zinc finger protein DOF3.5 OS=Arabidopsis thaliana OX=3702 GN=DOF3.5 PE=3 SV=1	S	Function unknown	PREDICTED: dof zinc finger protein DOF2.2-like [Daucus carota subsp. sativus]
c72786.graph_c0	0.00519928	-2.5484	down	--	--	--	K19041|4.28238e-67|sind:105176691|K19041 E3 ubiquitin-protein ligase RNF38/44 [EC:2.3.2.27] | (RefSeq) NEP1-interacting protein 1-like	[O]	Posttranslational modification, protein turnover, chaperones	Ring finger domain;; RING-like zinc finger;; RING-H2 zinc finger domain;; Zinc finger, C3HC4 type (RING finger);; Anaphase-promoting complex subunit 11 RING-H2 finger;; Zinc finger, C3HC4 type (RING finger);; RING-type zinc-finger	NEP1-interacting protein 1 OS=Arabidopsis thaliana OX=3702 GN=NIP1 PE=1 SV=2	O	Posttranslational modification, protein turnover, chaperones	PREDICTED: NEP1-interacting protein 1 [Daucus carota subsp. sativus]
c89959.graph_c0	1.12041e-16	-3.12368	down	[R]	General function prediction only	Cellular Component: integral component of membrane (GO:0016021);;	K06890|1.564e-116|egr:104426637|K06890 uncharacterized protein | (RefSeq) BI1-like protein	[T]	Signal transduction mechanisms	Fantastic Four meristem regulator;; B-box zinc finger;; Inhibitor of apoptosis-promoting Bax1	Protein LIFEGUARD 2 OS=Arabidopsis thaliana OX=3702 GN=LFG2 PE=2 SV=1	S	Function unknown	PREDICTED: protein FAF-like, chloroplastic [Daucus carota subsp. sativus]
c80054.graph_c0	1.16597e-07	-3.90039	down	--	--	--	--	[R]	General function prediction only	Zn-finger in Ran binding protein and others	RanBP2-type zinc finger protein At1g67325 OS=Arabidopsis thaliana OX=3702 GN=At1g67325 PE=1 SV=1	S	Function unknown	PREDICTED: zinc finger Ran-binding domain-containing protein 2-like isoform X1 [Daucus carota subsp. sativus]
C3H
c83854.graph_c0	0.0023819	2.01084	up	--	--	--	--	[R]	General function prediction only	Zinc finger C-x8-C-x5-C-x3-H type (and similar);; RNA-binding, Nab2-type zinc finger;; Torus domain	Zinc finger CCCH domain-containing protein 3 OS=Arabidopsis thaliana OX=3702 GN=At1g04990 PE=2 SV=1	S	Function unknown	PREDICTED: zinc finger CCCH domain-containing protein 3-like [Daucus carota subsp. sativus]
c82364.graph_c1	1.3362e-09	1.83756	up	--	--	--	--	[R]	General function prediction only	Zinc finger C-x8-C-x5-C-x3-H type (and similar);; RNA-binding, Nab2-type zinc finger	Zinc finger CCCH domain-containing protein 3 OS=Arabidopsis thaliana OX=3702 GN=At1g04990 PE=2 SV=1	S	Function unknown	PREDICTED: zinc finger CCCH domain-containing protein 3-like [Daucus carota subsp. sativus]
c90194.graph_c0	0.000478317	1.04804	up	--	--	--	--	[R]	General function prediction only	Zinc finger C-x8-C-x5-C-x3-H type (and similar)	Zinc finger CCCH domain-containing protein 6 OS=Oryza sativa subsp. japonica OX=39947 GN=Os01g0258700 PE=2 SV=2	S	Function unknown	PREDICTED: zinc finger CCCH domain-containing protein 34-like isoform X1 [Daucus carota subsp. sativus]
C2H2
c90948.graph_c0	0.000884323	-1.00835	down	--	--	--	--	[R]	General function prediction only	Zinc finger, C2H2 type;; Zinc-finger double-stranded RNA-binding	Protein indeterminate-domain 5, chloroplastic OS=Arabidopsis thaliana OX=3702 GN=IDD5 PE=1 SV=1	S	Function unknown	PREDICTED: protein indeterminate-domain 4, chloroplastic-like [Daucus carota subsp. sativus]
c86688.graph_c0	0.00432543	-1.19354	down	--	--	Molecular Function: binding (GO:0005488);;	--	[R]	General function prediction only	Zinc finger, C2H2 type;; C2H2-type zinc finger	Zinc finger protein WIP3 OS=Arabidopsis thaliana OX=3702 GN=WIP3 PE=2 SV=1	S	Function unknown	PREDICTED: zinc finger protein WIP3 [Daucus carota subsp. sativus]
c83621.graph_c0	0.00041244	-1.35988	down	--	--	--	--	[R]	General function prediction only	Zinc-finger double-stranded RNA-binding	Zinc finger protein JACKDAW OS=Arabidopsis thaliana OX=3702 GN=JKD PE=1 SV=1	S	Function unknown	PREDICTED: protein indeterminate-domain 9 [Daucus carota subsp. sativus]
c81750.graph_c0	9.34883e-07	-2.58951	down	--	--	--	--	--	--	--	Zinc finger protein GIS OS=Arabidopsis thaliana OX=3702 GN=GIS PE=1 SV=1	S	Function unknown	PREDICTED: zinc finger protein 8 [Daucus carota subsp. sativus]
c91404.graph_c0	0.00326759	1.52013	up	--	--	--	--	[R]	General function prediction only	Zinc finger, C2H2 type;; Zinc-finger double-stranded RNA-binding	Protein indeterminate-domain 1 OS=Arabidopsis thaliana OX=3702 GN=IDD1 PE=1 SV=1	S	Function unknown	PREDICTED: protein indeterminate-domain 2-like [Daucus carota subsp. sativus]
CO-like
c81352.graph_c0	0.00207879	-1.71777	down	--	--	Cellular Component: intracellular (GO:0005622);; Molecular Function: zinc ion binding (GO:0008270);;	--	[K]	Transcription	CCT motif	Zinc finger protein CONSTANS-LIKE 6 OS=Arabidopsis thaliana OX=3702 GN=COL6 PE=2 SV=2	K	Transcription	PREDICTED: zinc finger protein CONSTANS-LIKE 16-like [Daucus carota subsp. sativus]
c88554.graph_c0	1.39489e-11	1.67097	up	--	--	--	--	--	--	B-box zinc finger;; CCT motif	Zinc finger protein CONSTANS-LIKE 15 OS=Arabidopsis thaliana OX=3702 GN=COL15 PE=1 SV=1	S	Function unknown	PREDICTED: zinc finger protein CONSTANS-LIKE 15 isoform X2 [Daucus carota subsp. sativus]
c91169.graph_c0	0.00642749	1.1241	up	--	--	--	--	--	--	B-box zinc finger	Zinc finger protein CONSTANS-LIKE 10 OS=Arabidopsis thaliana OX=3702 GN=COL10 PE=1 SV=1	S	Function unknown	PREDICTED: zinc finger protein CONSTANS-LIKE 10-like [Daucus carota subsp. sativus]
c91218.graph_c0	1.36305e-09	-1.47207	down	--	--	--	--	[K]	Transcription	B-box zinc finger;; CCT motif	Zinc finger protein CONSTANS-LIKE 5 OS=Arabidopsis thaliana OX=3702 GN=COL5 PE=2 SV=2	K	Transcription	PREDICTED: zinc finger protein CONSTANS-LIKE 5-like [Daucus carota subsp. sativus]
c84614.graph_c0	1.58592e-08	-2.17095	down	--	--	--	--	[K]	Transcription	B-box zinc finger;; CCT motif	Zinc finger protein CONSTANS-LIKE 5 OS=Arabidopsis thaliana OX=3702 GN=COL5 PE=2 SV=2	K	Transcription	PREDICTED: zinc finger protein CONSTANS-LIKE 5 [Daucus carota subsp. sativus]
c89945.graph_c0	3.47862e-06	-2.27475	down	--	--	--	--	[K]	Transcription	B-box zinc finger;; CCT motif	Zinc finger protein CONSTANS-LIKE 16 OS=Arabidopsis thaliana OX=3702 GN=COL16 PE=1 SV=2	K	Transcription	PREDICTED: zinc finger protein CONSTANS-LIKE 16-like [Daucus carota subsp. sativus]
c82612.graph_c0	1.36118e-05	-2.35667	down	--	--	--	--	[K]	Transcription	B-box zinc finger	Zinc finger protein CONSTANS-LIKE 16 OS=Arabidopsis thaliana OX=3702 GN=COL16 PE=1 SV=2	K	Transcription	PREDICTED: zinc finger protein CONSTANS-LIKE 16 [Daucus carota subsp. sativus]
DBB family
c80809.graph_c0	6.4615e-10	2.0744	up	--	--	Cellular Component: intracellular (GO:0005622);;	--	--	--	--	B-box zinc finger protein 18 OS=Arabidopsis thaliana OX=3702 GN=BBX18 PE=1 SV=2	S	Function unknown	PREDICTED: B-box zinc finger protein 18-like [Daucus carota subsp. sativus]
LSD one like 1 family
c80206.graph_c0	0.000203582	-1.30836	down	--	--	Biological Process: response to superoxide (GO:0000303);; Biological Process: response to hypoxia (GO:0001666);; Biological Process: response to molecule of oomycetes origin (GO:0002240);; Biological Process: plant-type hypersensitive response (GO:0009626);; Biological Process: regulation of ethylene-activated signaling pathway (GO:0010104);; Biological Process: regulation of hydrogen peroxide me…	--	--	--	LSD1 zinc finger;; LSD1 zinc finger	Protein LSD1 OS=Arabidopsis thaliana OX=3702 GN=LSD1 PE=1 SV=1	S	Function unknown	PREDICTED: protein LSD1-like [Daucus carota subsp. sativus]
c86961.graph_c0	0.000102056	-2.02906	down	--	--	--	--	--	--	LSD1 zinc finger;; LSD1 zinc finger	Protein LOL1 OS=Arabidopsis thaliana OX=3702 GN=LOL1 PE=2 SV=1	S	Function unknown	protein LOL1 [Manihot esculenta]
B3 family protein
c91620.graph_c0	1.55998e-10	2.11686	up	--	--	--	--	--	--	B3 DNA binding domain;; CW-type Zinc Finger	B3 domain-containing protein Os07g0563300 OS=Oryza sativa subsp. japonica OX=39947 GN=Os07g0563300 PE=3 SV=2	K	Transcription	PREDICTED: B3 domain-containing protein Os07g0563300-like isoform X1 [Daucus carota subsp. sativus]
DREB
c85466.graph_c0	0.00184878	-1.51543	down	--	--	Molecular Function: DNA binding (GO:0003677);; Molecular Function: transcription factor activity, sequence-specific DNA binding (GO:0003700);; Cellular Component: nucleus (GO:0005634);; Biological Process: regulation of transcription, DNA-templated (GO:0006355);;	K09286|2.25355e-69|tcc:TCM_037194|K09286 EREBP-like factor | (RefSeq) Integrase-type DNA-binding superfamily protein	--	--	AP2 domain	Dehydration-responsive element-binding protein 3 OS=Arabidopsis thaliana OX=3702 GN=DREB3 PE=2 SV=1	K	Transcription	PREDICTED: dehydration-responsive element-binding protein 3-like [Daucus carota subsp. sativus]
SNF
c82633.graph_c0	3.99656e-09	1.9375	up	--	--	--	K07200|3.43152e-109|sot:102602555|K07200 5'-AMP-activated protein kinase, regulatory gamma subunit | (RefSeq) sucrose nonfermenting 4-like protein	[C]	Energy production and conversion	Glycogen recognition site of AMP-activated protein kinase;; CBS domain;; CBS domain	Sucrose nonfermenting 4-like protein OS=Arabidopsis thaliana OX=3702 GN=SNF4 PE=1 SV=1	S	Function unknown	PREDICTED: sucrose nonfermenting 4-like protein [Daucus carota subsp. sativus]
c85768.graph_c0	0.000274181	1.27537	up	[T]	Signal transduction mechanisms	Cellular Component: plant-type cell wall (GO:0009505);; Molecular Function: kinase activity (GO:0016301);; Molecular Function: protein kinase regulator activity (GO:0019887);; Biological Process: regulation of protein kinase activity (GO:0045859);;	--	[C]	Energy production and conversion	CBS domain	SNF1-related protein kinase regulatory subunit gamma-1 OS=Arabidopsis thaliana OX=3702 GN=KING1 PE=1 SV=2	T	Signal transduction mechanisms	PREDICTED: SNF1-related protein kinase regulatory subunit gamma-1-like [Daucus carota subsp. sativus]
PHD
c81455.graph_c0	1.07789e-08	1.9049	up	--	--	Cellular Component: nucleus (GO:0005634);; Molecular Function: zinc ion binding (GO:0008270);; Molecular Function: methylated histone binding (GO:0035064);;	K11346|2.60749e-132|sind:105170630|K11346 inhibitor of growth protein 4 | (RefSeq) PHD finger protein ING2	[B]	Chromatin structure and dynamics	Inhibitor of growth proteins N-terminal histone-binding;; PHD-finger	PHD finger protein ING2 OS=Arabidopsis thaliana OX=3702 GN=ING2 PE=1 SV=1	B	Chromatin structure and dynamics	PREDICTED: PHD finger protein ING2-like isoform X1 [Daucus carota subsp. sativus]
c89665.graph_c0	0.00408157	-1.25082	down	--	--	--	--	[BK]	--	PHD-finger	DDT domain-containing protein PTM OS=Arabidopsis thaliana OX=3702 GN=PTM PE=1 SV=1	S	Function unknown	hypothetical protein DCAR_018746 [Daucus carota subsp. sativus]
ARR-B
c88890.graph_c1	3.05961e-07	1.22853	up	[T]	Signal transduction mechanisms	Biological Process: phosphorelay signal transduction system (GO:0000160);; Molecular Function: DNA binding (GO:0003677);; Molecular Function: transcription factor activity, sequence-specific DNA binding (GO:0003700);; Cellular Component: nucleus (GO:0005634);; Biological Process: regulation of transcription, DNA-templated (GO:0006355);; Cellular Component: integral component of membrane (GO:00160…	K14491|3.27652e-131|vvi:100250889|K14491 two-component response regulator ARR-B family | (RefSeq) two-component response regulator ARR12-like	[K]	Transcription	Response regulator receiver domain;; Myb-like DNA-binding domain	Two-component response regulator ORR24 OS=Oryza sativa subsp. indica OX=39946 GN=RR24 PE=3 SV=1	K	Transcription	PREDICTED: two-component response regulator ARR12 [Daucus carota subsp. sativus]
Trihelix
c89713.graph_c0	6.79571e-06	-1.17416	down	--	--	--	--	--	--	Syntaxin 6, N-terminal;; Myb/SANT-like DNA-binding domain	Trihelix transcription factor ASIL2 OS=Arabidopsis thaliana OX=3702 GN=ASIL2 PE=1 SV=1	S	Function unknown	PREDICTED: uncharacterized protein LOC108192951 [Daucus carota subsp. sativus]

## Sheet: TFs in V11E0135
#ID	FDR	log2FC	regulated	COG_class	COG_class_annotation	GO_annotation	KEGG_annotation	KOG_class	KOG_class_annotation	Pfam_annotation	Swissprot_annotation	eggNOG_class	eggNOG_class_annotation	nr_annotation
ERF
c88017.graph_c0	8.81498e-08	-1.28991	down	--	--	--	--	--	--	AP2 domain	Ethylene-responsive transcription factor ERF015 OS=Arabidopsis thaliana OX=3702 GN=ERF015 PE=2 SV=1	K	Transcription	PREDICTED: ethylene-responsive transcription factor ERF015-like [Daucus carota subsp. sativus]
c79717.graph_c0	0.000179499	-1.40645	down	--	--	Molecular Function: DNA binding (GO:0003677);; Molecular Function: transcription factor activity, sequence-specific DNA binding (GO:0003700);; Cellular Component: nucleus (GO:0005634);; Biological Process: regulation of transcription, DNA-templated (GO:0006355);; Biological Process: response to stimulus (GO:0050896);;	K09286|2.14409e-72|spen:107012718|K09286 EREBP-like factor | (RefSeq) ethylene-responsive transcription factor 1	--	--	AP2 domain	Ethylene-responsive transcription factor 2 OS=Nicotiana tabacum OX=4097 GN=ERF2 PE=2 SV=1	K	Transcription	PREDICTED: ethylene-responsive transcription factor 2-like [Daucus carota subsp. sativus]
c85419.graph_c0	0.00617229	-1.48276	down	--	--	Molecular Function: DNA binding (GO:0003677);; Molecular Function: transcription factor activity, sequence-specific DNA binding (GO:0003700);; Cellular Component: nucleus (GO:0005634);; Biological Process: regulation of transcription, DNA-templated (GO:0006355);; Biological Process: multicellular organism development (GO:0007275);;	K09284|2.79619e-84|vvi:100246815|K09284 AP2-like factor, euAP2 lineage | (RefSeq) ethylene-responsive transcription factor RAP2-7	--	--	AP2 domain	Floral homeotic protein APETALA 2 OS=Arabidopsis thaliana OX=3702 GN=AP2 PE=1 SV=1	K	Transcription	PREDICTED: AP2-like ethylene-responsive transcription factor TOE3 [Daucus carota subsp. sativus]
c85770.graph_c0	6.70358e-20	-2.03088	down	--	--	Biological Process: transcription, DNA-templated (GO:0006351);;	--	--	--	AP2 domain	Ethylene-responsive transcription factor ERF061 OS=Arabidopsis thaliana OX=3702 GN=ERF061 PE=2 SV=1	K	Transcription	PREDICTED: ethylene-responsive transcription factor ERF061 [Daucus carota subsp. sativus]
c82715.graph_c0	0.00250268	-2.07558	down	--	--	Cellular Component: nucleus (GO:0005634);; Biological Process: response to salicylic acid (GO:0009751);; Biological Process: response to jasmonic acid (GO:0009753);; Biological Process: cellular response to heat (GO:0034605);; Molecular Function: sequence-specific DNA binding (GO:0043565);; Molecular Function: transcription regulatory region DNA binding (GO:0044212);; Biological Process: positive…	--	--	--	AP2 domain	Ethylene-responsive transcription factor ERF012 OS=Arabidopsis thaliana OX=3702 GN=ERF012 PE=2 SV=1	K	Transcription	PREDICTED: ethylene-responsive transcription factor ERF014 [Daucus carota subsp. sativus]
c79475.graph_c0	2.46633e-15	-2.14649	down	--	--	Molecular Function: DNA binding (GO:0003677);; Molecular Function: transcription factor activity, sequence-specific DNA binding (GO:0003700);; Cellular Component: nucleus (GO:0005634);; Biological Process: regulation of transcription, DNA-templated (GO:0006355);; Biological Process: response to auxin (GO:0009733);; Biological Process: regulation of ethylene-activated signaling pathway (GO:0010104…	K09286|6.91293e-34|cmo:103495486|K09286 EREBP-like factor | (RefSeq) ethylene-responsive transcription factor 4	--	--	AP2 domain	Ethylene-responsive transcription factor 9 OS=Arabidopsis thaliana OX=3702 GN=ERF9 PE=2 SV=1	K	Transcription	PREDICTED: ethylene-responsive transcription factor 4-like [Daucus carota subsp. sativus]
c81233.graph_c0	0.000105139	-2.27894	down	--	--	Molecular Function: DNA binding (GO:0003677);; Molecular Function: transcription factor activity, sequence-specific DNA binding (GO:0003700);; Cellular Component: nucleus (GO:0005634);; Biological Process: regulation of transcription, DNA-templated (GO:0006355);;	K09286|1.67056e-27|sot:102605299|K09286 EREBP-like factor | (RefSeq) ethylene-responsive transcription factor 4-like	--	--	AP2 domain	Ethylene-responsive transcription factor 4 OS=Nicotiana tabacum OX=4097 GN=ERF4 PE=1 SV=1	K	Transcription	PREDICTED: ethylene-responsive transcription factor 4-like [Daucus carota subsp. sativus]
c89064.graph_c0	1.15407e-22	-2.53562	down	--	--	Molecular Function: DNA binding (GO:0003677);; Molecular Function: transcription factor activity, sequence-specific DNA binding (GO:0003700);; Cellular Component: nucleus (GO:0005634);; Biological Process: regulation of transcription, DNA-templated (GO:0006355);;	K09286|1.30069e-25|pper:PRUPE_ppa010090mg|K09286 EREBP-like factor | (RefSeq) hypothetical protein	--	--	AP2 domain	Ethylene-responsive transcription factor 9 OS=Arabidopsis thaliana OX=3702 GN=ERF9 PE=2 SV=1	K	Transcription	PREDICTED: ethylene-responsive transcription factor 4 [Daucus carota subsp. sativus]
bZIP
c71950.graph_c0	0.000367444	2.75878	up	--	--	Molecular Function: transcription factor activity, sequence-specific DNA binding (GO:0003700);; Biological Process: regulation of transcription, DNA-templated (GO:0006355);; Molecular Function: sequence-specific DNA binding (GO:0043565);;	--	[K]	Transcription	bZIP transcription factor	--	K	Transcription	predicted protein [Hordeum vulgare subsp. vulgare]
c84723.graph_c1	1.98928e-16	-1.28008	down	--	--	Molecular Function: transcription factor activity, sequence-specific DNA binding (GO:0003700);; Biological Process: regulation of transcription, DNA-templated (GO:0006355);; Molecular Function: sequence-specific DNA binding (GO:0043565);;	--	--	--	bZIP transcription factor;; Basic region leucine zipper	bZIP transcription factor 53 OS=Arabidopsis thaliana OX=3702 GN=BZIP53 PE=1 SV=1	K	Transcription	PREDICTED: bZIP transcription factor 53-like [Daucus carota subsp. sativus]
c83971.graph_c0	4.70266e-07	-3.51058	down	--	--	--	--	--	--	bZIP transcription factor;; Basic region leucine zipper	Basic leucine zipper 61 OS=Arabidopsis thaliana OX=3702 GN=BZIP61 PE=1 SV=1	K	Transcription	PREDICTED: basic leucine zipper 61-like [Daucus carota subsp. sativus]
c86442.graph_c0	1.46869e-09	2.16513	up	--	--	Molecular Function: protein dimerization activity (GO:0046983);;	--	--	--	Basic leucine-zipper C terminal	Basic leucine zipper 9 OS=Arabidopsis thaliana OX=3702 GN=BZIP9 PE=1 SV=1	K	Transcription	PREDICTED: basic leucine zipper 9-like isoform X2 [Daucus carota subsp. sativus]
c71769.graph_c0	0.000116012	1.20509	up	--	--	Molecular Function: binding (GO:0005488);;	--	--	--	Basic leucine-zipper C terminal	Basic leucine zipper 9 OS=Arabidopsis thaliana OX=3702 GN=BZIP9 PE=1 SV=1	K	Transcription	PREDICTED: basic leucine zipper 9-like [Daucus carota subsp. sativus]
c86731.graph_c0	1.16134e-06	-2.65328	down	--	--	Molecular Function: transcription factor activity, sequence-specific DNA binding (GO:0003700);; Biological Process: regulation of transcription, DNA-templated (GO:0006355);; Molecular Function: sequence-specific DNA binding (GO:0043565);;	--	--	--	--	Basic leucine zipper 61 OS=Arabidopsis thaliana OX=3702 GN=BZIP61 PE=1 SV=1	K	Transcription	PREDICTED: basic leucine zipper 61-like [Daucus carota subsp. sativus]
NAC
c79379.graph_c0	6.16121e-11	2.50121	up	--	--	Molecular Function: DNA binding (GO:0003677);; Cellular Component: nucleus (GO:0005634);; Biological Process: regulation of transcription, DNA-templated (GO:0006355);;	--	--	--	No apical meristem (NAM) protein	NAC domain-containing protein 100 OS=Arabidopsis thaliana OX=3702 GN=NAC100 PE=2 SV=1	S	Function unknown	PREDICTED: NAC domain-containing protein 100-like [Daucus carota subsp. sativus]
c85964.graph_c0	5.38825e-06	1.20761	up	--	--	Molecular Function: DNA binding (GO:0003677);; Cellular Component: nucleus (GO:0005634);; Biological Process: regulation of transcription, DNA-templated (GO:0006355);;	--	--	--	No apical meristem (NAM) protein;; No apical meristem (NAM) protein	NAC domain-containing protein 100 OS=Arabidopsis thaliana OX=3702 GN=NAC100 PE=2 SV=1	S	Function unknown	PREDICTED: NAC domain-containing protein 100 [Daucus carota subsp. sativus]
c83960.graph_c0	0.00670008	-1.03062	down	--	--	Molecular Function: DNA binding (GO:0003677);; Cellular Component: nucleus (GO:0005634);; Biological Process: regulation of transcription, DNA-templated (GO:0006355);;	--	--	--	No apical meristem (NAM) protein;; No apical meristem (NAM) protein	NAC domain-containing protein 22 OS=Oryza sativa subsp. japonica OX=39947 GN=NAC022 PE=2 SV=1	S	Function unknown	hypothetical protein DCAR_006295 [Daucus carota subsp. sativus]
c72697.graph_c1	0.00253631	-1.5354	down	--	--	Biological Process: transcription, DNA-templated (GO:0006351);;	--	--	--	No apical meristem (NAM) protein	NAC domain-containing protein 71 OS=Arabidopsis thaliana OX=3702 GN=NAC071 PE=2 SV=1	S	Function unknown	PREDICTED: NAC domain-containing protein 86-like [Daucus carota subsp. sativus]
WRKY
c89023.graph_c0	0.00455446	1.50056	up	--	--	--	K18835|1.06878e-98|mdm:103451420|K18835 WRKY transcription factor 2 | (RefSeq) WRKY transcription factor SUSIBA2-like	--	--	WRKY DNA -binding domain	WRKY transcription factor SUSIBA2 OS=Hordeum vulgare OX=4513 GN=WRKY46 PE=1 SV=1	K	Transcription	PREDICTED: WRKY transcription factor SUSIBA2-like [Daucus carota subsp. sativus]
c89591.graph_c0	6.37686e-05	1.03803	up	--	--	--	--	--	--	WRKY DNA -binding domain;; WRKY DNA -binding domain	Probable WRKY transcription factor 69 OS=Arabidopsis thaliana OX=3702 GN=WRKY69 PE=2 SV=1	K	Transcription	PREDICTED: probable WRKY transcription factor 35 [Daucus carota subsp. sativus]
c84140.graph_c0	0.00710226	-1.09973	down	--	--	Molecular Function: DNA binding (GO:0003677);; Biological Process: cellular process (GO:0009987);;	K13424|1.49677e-147|cit:102608921|K13424 WRKY transcription factor 33 | (RefSeq) probable WRKY transcription factor 33	--	--	WRKY DNA -binding domain	Probable WRKY transcription factor 33 OS=Arabidopsis thaliana OX=3702 GN=WRKY33 PE=1 SV=2	K	Transcription	PREDICTED: probable WRKY transcription factor 33 [Daucus carota subsp. sativus]
c88783.graph_c0	0.00814541	-1.25471	down	--	--	Molecular Function: transcription factor activity, sequence-specific DNA binding (GO:0003700);; Biological Process: regulation of transcription, DNA-templated (GO:0006355);; Molecular Function: sequence-specific DNA binding (GO:0043565);;	--	--	--	WRKY DNA -binding domain	Probable WRKY transcription factor 40 OS=Arabidopsis thaliana OX=3702 GN=WRKY40 PE=1 SV=1	K	Transcription	transcription factor WRKY4 [Petroselinum crispum]
c82006.graph_c0	0.00998254	-1.62797	down	--	--	--	K13425|1.69535e-25|sind:105164227|K13425 WRKY transcription factor 22 | (RefSeq) probable WRKY transcription factor 29	--	--	WRKY DNA -binding domain	WRKY transcription factor 22 OS=Arabidopsis thaliana OX=3702 GN=WRKY22 PE=2 SV=1	K	Transcription	PREDICTED: WRKY transcription factor 22 [Daucus carota subsp. sativus]
c83166.graph_c0	0.00491225	-1.87761	down	--	--	--	--	--	--	WRKY DNA -binding domain	WRKY transcription factor 22 OS=Arabidopsis thaliana OX=3702 GN=WRKY22 PE=2 SV=1	K	Transcription	PREDICTED: WRKY transcription factor 22-like [Daucus carota subsp. sativus]
c79834.graph_c1	8.81498e-08	-1.90624	down	--	--	Molecular Function: transcription factor activity, sequence-specific DNA binding (GO:0003700);; Biological Process: regulation of transcription, DNA-templated (GO:0006355);; Molecular Function: sequence-specific DNA binding (GO:0043565);;	--	--	--	WRKY DNA -binding domain	Probable WRKY transcription factor 40 OS=Arabidopsis thaliana OX=3702 GN=WRKY40 PE=1 SV=1	K	Transcription	PREDICTED: probable WRKY transcription factor 40 [Daucus carota subsp. sativus]
c86570.graph_c0	2.1212e-05	-1.98089	down	--	--	--	--	--	--	WRKY DNA -binding domain	Probable WRKY transcription factor 30 OS=Arabidopsis thaliana OX=3702 GN=WRKY30 PE=2 SV=1	K	Transcription	PREDICTED: probable WRKY transcription factor 30 [Daucus carota subsp. sativus]
c79834.graph_c2	5.13959e-09	-2.21779	down	--	--	Molecular Function: transcription factor activity, sequence-specific DNA binding (GO:0003700);; Biological Process: regulation of transcription, DNA-templated (GO:0006355);; Molecular Function: sequence-specific DNA binding (GO:0043565);;	--	--	--	--	Probable WRKY transcription factor 40 OS=Arabidopsis thaliana OX=3702 GN=WRKY40 PE=1 SV=1	K	Transcription	transcription factor WRKY4 [Petroselinum crispum]
c87388.graph_c0	9.66885e-17	-2.94028	down	--	--	--	--	--	--	WRKY DNA -binding domain	Probable WRKY transcription factor 53 OS=Arabidopsis thaliana OX=3702 GN=WRKY53 PE=1 SV=1	K	Transcription	PREDICTED: probable WRKY transcription factor 53 [Daucus carota subsp. sativus]
MYB
c81261.graph_c0	1.61623e-07	3.50921	up	--	--	--	K09422|8.45669e-24|vvi:100260318|K09422 myb proto-oncogene protein, plant | (RefSeq) transcription factor MYB59	--	--	--	--	K	Transcription	PREDICTED: transcription factor MYB48-like [Daucus carota subsp. sativus]
c81261.graph_c1	0.000622285	2.45834	up	--	--	--	K09422|6.3664e-70|aip:107613266|K09422 myb proto-oncogene protein, plant | (RefSeq) transcription factor MYB48	[K]	Transcription	Myb-like DNA-binding domain;; Myb-like DNA-binding domain;; Myb-like DNA-binding domain	Transcription factor MYB48 OS=Arabidopsis thaliana OX=3702 GN=MYB48 PE=2 SV=1	K	Transcription	PREDICTED: transcription factor MYB59 [Daucus carota subsp. sativus]
c85756.graph_c0	1.77481e-06	1.09319	up	--	--	Biological Process: transcription, DNA-templated (GO:0006351);;	--	[O]	Posttranslational modification, protein turnover, chaperones	Myb-like DNA-binding domain;; Myb-like DNA-binding domain	Transcription factor DIVARICATA OS=Antirrhinum majus OX=4151 GN=DIVARICATA PE=2 SV=1	K	Transcription	PREDICTED: transcription factor DIVARICATA-like [Daucus carota subsp. sativus]
c83141.graph_c0	0.000276679	-1.03875	down	--	--	--	K09422|1.72485e-110|vra:106778107|K09422 myb proto-oncogene protein, plant | (RefSeq) transcription factor MYB44-like	[K]	Transcription	Myb-like DNA-binding domain;; Myb-like DNA-binding domain	Transcription factor MYB73 OS=Arabidopsis thaliana OX=3702 GN=MYB73 PE=1 SV=1	K	Transcription	PREDICTED: transcription factor MYB44 [Daucus carota subsp. sativus]
c87741.graph_c1	0.00694435	-1.1146	down	--	--	Molecular Function: DNA binding (GO:0003677);; Cellular Component: nucleus (GO:0005634);; Biological Process: regulation of transcription, DNA-templated (GO:0006355);;	--	[O]	Posttranslational modification, protein turnover, chaperones	Myb-like DNA-binding domain;; Myb-like DNA-binding domain	Transcription factor DIVARICATA OS=Antirrhinum majus OX=4151 GN=DIVARICATA PE=2 SV=1	K	Transcription	PREDICTED: transcription factor DIVARICATA-like [Daucus carota subsp. sativus]
c83235.graph_c0	0.00110246	-2.29136	down	--	--	--	K09422|3.32878e-19|pop:POPTR_0005s24550g|K09422 myb proto-oncogene protein, plant | (RefSeq) POPTRDRAFT_559693; hypothetical protein	[K]	Transcription	--	Transcription factor MYB14 OS=Arabidopsis thaliana OX=3702 GN=MYB14 PE=2 SV=1	K	Transcription	PREDICTED: myb-related protein Myb4 [Daucus carota subsp. sativus]
c73170.graph_c0	6.79354e-05	-2.74905	down	--	--	--	--	--	--	--	--	--	--	transcription factor DcMYB5 [Daucus carota]
c87038.graph_c0	1.28669e-06	-1.50753	down	--	--	Molecular Function: DNA binding (GO:0003677);;	K09422|2.23733e-65|egu:105040495|K09422 myb proto-oncogene protein, plant | (RefSeq) transcription factor RAX2	[K]	Transcription	Myb-like DNA-binding domain;; Myb-like DNA-binding domain;; Snf7	Transcription factor RAX2 OS=Arabidopsis thaliana OX=3702 GN=RAX2 PE=1 SV=1	K	Transcription	PREDICTED: transcription factor RAX1-like [Daucus carota subsp. sativus]
c85128.graph_c0	3.62237e-07	-1.52917	down	--	--	--	K09422|1.32731e-66|sind:105177270|K09422 myb proto-oncogene protein, plant | (RefSeq) myb-related protein 306-like	[K]	Transcription	Myb-like DNA-binding domain;; Myb-like DNA-binding domain	Transcription factor MYB106 OS=Arabidopsis thaliana OX=3702 GN=MYB106 PE=2 SV=1	K	Transcription	PREDICTED: protein ODORANT1-like [Daucus carota subsp. sativus]
MYB_related
c66926.graph_c0	0.00476921	2.35562	up	--	--	Cellular Component: cytoplasm (GO:0005737);; Cellular Component: intracellular organelle (GO:0043229);;	K09522|1.32671e-16|mpp:MICPUCDRAFT_42020|K09522 DnaJ homolog subfamily C member 2 | (RefSeq) hypothetical protein	[O]	Posttranslational modification, protein turnover, chaperones	Myb-like DNA-binding domain;; Ribosome-associated complex head domain;; Myb-like DNA-binding domain	Transcription factor MAMYB OS=Arabidopsis thaliana OX=3702 GN=MAMYB PE=1 SV=1	K	Transcription	hypothetical protein BZG36_03052 [Bifiguratus adelaidae]
c79856.graph_c0	3.34173e-15	-1.57905	down	--	--	Molecular Function: DNA binding (GO:0003677);; Cellular Component: nucleus (GO:0005634);; Biological Process: regulation of transcription, DNA-templated (GO:0006355);;	--	[O]	Posttranslational modification, protein turnover, chaperones	Myb-like DNA-binding domain	Protein REVEILLE 8 OS=Arabidopsis thaliana OX=3702 GN=RVE8 PE=2 SV=1	K	Transcription	hypothetical protein DCAR_020870 [Daucus carota subsp. sativus]
c76910.graph_c0	4.37279e-28	-4.5912	down	--	--	Molecular Function: DNA binding (GO:0003677);; Cellular Component: nucleus (GO:0005634);;	--	[O]	Posttranslational modification, protein turnover, chaperones	Myb-like DNA-binding domain	Transcription factor RADIALIS OS=Antirrhinum majus OX=4151 GN=RAD PE=1 SV=1	K	Transcription	PREDICTED: protein RADIALIS-like 1 isoform X1 [Daucus carota subsp. sativus]
c82616.graph_c0	2.65658e-60	-4.83013	down	--	--	Molecular Function: DNA binding (GO:0003677);; Cellular Component: nucleus (GO:0005634);;	--	[O]	Posttranslational modification, protein turnover, chaperones	Myb-like DNA-binding domain	Protein RADIALIS-like 1 OS=Arabidopsis thaliana OX=3702 GN=RL1 PE=2 SV=1	K	Transcription	PREDICTED: protein RADIALIS-like 1 [Daucus carota subsp. sativus]
c79053.graph_c0	0.00994798	1.18276	up	--	--	--	K09422|7.18012e-22|pmum:103338514|K09422 myb proto-oncogene protein, plant | (RefSeq) myb-related protein 306-like	[K]	Transcription	--	Myb-related protein 306 OS=Antirrhinum majus OX=4151 GN=MYB306 PE=2 SV=1	K	Transcription	PREDICTED: myb-related protein 306-like [Daucus carota subsp. sativus]
G2-like
c81366.graph_c0	0.00489389	-1.66479	down	--	--	Molecular Function: DNA binding (GO:0003677);; Cellular Component: nucleus (GO:0005634);; Biological Process: regulation of transcription, DNA-templated (GO:0006355);; Cellular Component: membrane (GO:0016020);;	--	--	--	Myb-like DNA-binding domain	Putative Myb family transcription factor At1g14600 OS=Arabidopsis thaliana OX=3702 GN=At1g14600 PE=2 SV=2	S	Function unknown	PREDICTED: putative Myb family transcription factor At1g14600 [Daucus carota subsp. sativus]
HSF
c85160.graph_c0	8.07203e-12	2.12763	up	--	--	--	K09419|1.86305e-46|cmo:103492645|K09419 heat shock transcription factor, other eukaryote | (RefSeq) heat stress transcription factor A-6b-like	[K]	Transcription	HSF-type DNA-binding	Heat stress transcription factor A-2b OS=Oryza sativa subsp. japonica OX=39947 GN=HSFA2B PE=2 SV=1	K	Transcription	PREDICTED: heat stress transcription factor A-6b-like [Daucus carota subsp. sativus]
c78561.graph_c0	0.000705708	-2.70114	down	--	--	--	K09419|7.6391e-95|vvi:100250580|K09419 heat shock transcription factor, other eukaryote | (RefSeq) heat stress transcription factor A-4b	[K]	Transcription	HSF-type DNA-binding	Heat stress transcription factor A-4b OS=Oryza sativa subsp. japonica OX=39947 GN=HSFA4B PE=2 SV=1	K	Transcription	PREDICTED: heat stress transcription factor A-4a-like [Daucus carota subsp. sativus]
DREB
c77599.graph_c1	0.000163121	-1.20254	down	--	--	Molecular Function: DNA binding (GO:0003677);; Molecular Function: transcription factor activity, sequence-specific DNA binding (GO:0003700);; Cellular Component: nucleus (GO:0005634);; Biological Process: regulation of transcription, DNA-templated (GO:0006355);;	--	--	--	--	Dehydration-responsive element-binding protein 1A OS=Arabidopsis thaliana OX=3702 GN=DREB1A PE=1 SV=2	K	Transcription	PREDICTED: dehydration-responsive element-binding protein 1B-like [Daucus carota subsp. sativus]
OFP
c84806.graph_c0	2.85024e-06	-2.482	down	--	--	--	--	--	--	Transcriptional repressor, ovate	Transcription repressor OFP13 OS=Arabidopsis thaliana OX=3702 GN=OFP13 PE=1 SV=1	S	Function unknown	PREDICTED: transcription repressor OFP15-like [Daucus carota subsp. sativus]
TCP
c82924.graph_c0	0.00686375	-1.16928	down	--	--	--	--	--	--	TCP family transcription factor	Transcription factor TCP19 OS=Arabidopsis thaliana OX=3702 GN=TCP19 PE=1 SV=1	K	Transcription	PREDICTED: transcription factor TCP9-like [Daucus carota subsp. sativus]
c85029.graph_c0	1.76978e-05	-1.18633	down	--	--	--	--	--	--	TCP family transcription factor	Transcription factor TCP20 OS=Arabidopsis thaliana OX=3702 GN=TCP20 PE=1 SV=1	--	--	PREDICTED: transcription factor TCP20-like [Daucus carota subsp. sativus]
c89068.graph_c0	7.49111e-08	-2.24083	down	--	--	--	--	--	--	TCP family transcription factor	Transcription factor TCP19 OS=Arabidopsis thaliana OX=3702 GN=TCP19 PE=1 SV=1	K	Transcription	PREDICTED: transcription factor TCP19-like [Daucus carota subsp. sativus]
LBD
c79407.graph_c0	1.2733e-12	-1.37706	down	--	--	--	--	--	--	Lateral organ boundaries (LOB) domain	LOB domain-containing protein 39 OS=Arabidopsis thaliana OX=3702 GN=LBD39 PE=2 SV=1	S	Function unknown	PREDICTED: LOB domain-containing protein 37-like [Daucus carota subsp. sativus]
AUX/IAA
c92224.graph_c1	0.00013649	1.17327	up	--	--	Molecular Function: DNA binding (GO:0003677);; Cellular Component: nucleus (GO:0005634);; Biological Process: regulation of transcription, DNA-templated (GO:0006355);; Biological Process: auxin-activated signaling pathway (GO:0009734);;	--	--	--	Auxin response factor;; AUX/IAA family	Auxin response factor 8 OS=Arabidopsis thaliana OX=3702 GN=ARF8 PE=1 SV=2	K	Transcription	PREDICTED: auxin response factor 8 isoform X1 [Daucus carota subsp. sativus]
c86008.graph_c0	2.92806e-09	-1.09856	down	--	--	Cellular Component: nucleus (GO:0005634);; Biological Process: regulation of transcription, DNA-templated (GO:0006355);; Biological Process: auxin-activated signaling pathway (GO:0009734);;	K14484|5.22368e-90|sind:105171635|K14484 auxin-responsive protein IAA | (RefSeq) auxin-induced protein 22D	--	--	AUX/IAA family	Auxin-induced protein 22B OS=Vigna radiata var. radiata OX=3916 GN=AUX22B PE=2 SV=1	--	--	PREDICTED: auxin-induced protein 22D-like [Daucus carota subsp. sativus]
c74223.graph_c0	0.00140726	-1.24227	down	--	--	--	K14484|2.58593e-29|gra:105800579|K14484 auxin-responsive protein IAA | (RefSeq) auxin-responsive protein IAA14-like	--	--	AUX/IAA family	Auxin-responsive protein IAA16 OS=Arabidopsis thaliana OX=3702 GN=IAA16 PE=1 SV=1	K	Transcription	PREDICTED: auxin-responsive protein IAA16-like [Daucus carota subsp. sativus]
c88666.graph_c1	1.45221e-29	-1.84549	down	--	--	Biological Process: transcription, DNA-templated (GO:0006351);; Biological Process: regulation of cellular process (GO:0050794);;	K14484|7.16104e-47|gmx:547949|K14484 auxin-responsive protein IAA | (RefSeq) SLR1; auxin-induced protein ali50	--	--	AUX/IAA family	Auxin-responsive protein IAA14 OS=Arabidopsis thaliana OX=3702 GN=IAA14 PE=1 SV=2	K	Transcription	PREDICTED: auxin-responsive protein IAA7-like [Daucus carota subsp. sativus]
c81865.graph_c0	3.06654e-05	-1.88589	down	--	--	Cellular Component: nucleus (GO:0005634);; Biological Process: regulation of transcription, DNA-templated (GO:0006355);; Biological Process: auxin-activated signaling pathway (GO:0009734);;	K14484|2.93653e-93|sind:105158425|K14484 auxin-responsive protein IAA | (RefSeq) auxin-responsive protein IAA14	--	--	AUX/IAA family	Auxin-responsive protein IAA14 OS=Arabidopsis thaliana OX=3702 GN=IAA14 PE=1 SV=2	K	Transcription	PREDICTED: auxin-responsive protein IAA14-like [Daucus carota subsp. sativus]
GRAS
c91516.graph_c0	0.000148191	1.61382	up	--	--	Molecular Function: transcription factor activity, sequence-specific DNA binding (GO:0003700);; Cellular Component: nucleus (GO:0005634);; Biological Process: regulation of transcription, DNA-templated (GO:0006355);; Molecular Function: sequence-specific DNA binding (GO:0043565);;	--	--	--	GRAS domain family	DELLA protein RGL1 OS=Arabidopsis thaliana OX=3702 GN=RGL1 PE=1 SV=1	S	Function unknown	PREDICTED: DELLA protein RGL1-like [Daucus carota subsp. sativus]
c88994.graph_c0	6.07039e-06	-1.14728	down	--	--	Biological Process: transcription, DNA-templated (GO:0006351);;	K14494|0|pper:PRUPE_ppa003206mg|K14494 DELLA protein | (RefSeq) hypothetical protein	--	--	GRAS domain family;; Transcriptional regulator DELLA protein N terminal	DELLA protein GAI OS=Solanum lycopersicum OX=4081 GN=GAI PE=2 SV=1	K	Transcription	PREDICTED: DELLA protein GAI [Daucus carota subsp. sativus]
GATA
c75384.graph_c0	2.5135e-08	2.40147	up	--	--	--	--	[K]	Transcription	GATA zinc finger	GATA transcription factor 9 OS=Arabidopsis thaliana OX=3702 GN=GATA9 PE=2 SV=1	K	Transcription	PREDICTED: GATA transcription factor 2-like [Daucus carota subsp. sativus]
BHLH
c75921.graph_c0	2.0311e-07	-1.96676	down	--	--	--	--	--	--	--	--	--	--	PREDICTED: transcription factor bHLH130-like isoform X2 [Daucus carota subsp. sativus]
c82743.graph_c0	0.000940648	1.42011	up	--	--	--	--	--	--	--	Transcription factor bHLH147 OS=Arabidopsis thaliana OX=3702 GN=BHLH147 PE=1 SV=1	K	Transcription	PREDICTED: transcription factor bHLH147-like [Daucus carota subsp. sativus]
c85474.graph_c0	3.389e-07	-1.01964	down	--	--	--	--	--	--	Helix-loop-helix DNA-binding domain	Transcription factor bHLH30 OS=Arabidopsis thaliana OX=3702 GN=BHLH30 PE=1 SV=1	K	Transcription	hypothetical protein DCAR_028008 [Daucus carota subsp. sativus]
c85468.graph_c0	2.82906e-11	-1.24626	down	--	--	Molecular Function: core promoter sequence-specific DNA binding (GO:0001046);; Molecular Function: transcriptional activator activity, RNA polymerase II transcription regulatory region sequence-specific binding (GO:0001228);; Cellular Component: nucleus (GO:0005634);; Biological Process: positive regulation of transcription from RNA polymerase II promoter (GO:0045944);; Molecular Function: protei…	--	--	--	Helix-loop-helix DNA-binding domain	Transcription factor bHLH128 OS=Arabidopsis thaliana OX=3702 GN=BHLH128 PE=1 SV=1	K	Transcription	PREDICTED: transcription factor bHLH128-like [Daucus carota subsp. sativus]
c81074.graph_c0	0.00101746	-1.73479	down	--	--	--	--	--	--	Helix-loop-helix DNA-binding domain	Transcription factor bHLH94 OS=Arabidopsis thaliana OX=3702 GN=BHLH94 PE=1 SV=2	K	Transcription	PREDICTED: transcription factor bHLH71-like [Daucus carota subsp. sativus]
c90497.graph_c0	8.33493e-05	1.00595	up	--	--	Molecular Function: RNA polymerase II regulatory region sequence-specific DNA binding (GO:0000977);; Molecular Function: transcription factor activity, sequence-specific DNA binding (GO:0003700);; Biological Process: regulation of transcription from RNA polymerase II promoter (GO:0006357);; Molecular Function: protein dimerization activity (GO:0046983);; Cellular Component: RNA polymerase II tran…	--	--	--	--	Transcription factor bHLH125 OS=Arabidopsis thaliana OX=3702 GN=BHLH125 PE=2 SV=1	K	Transcription	hypothetical protein DCAR_018134 [Daucus carota subsp. sativus]
c85777.graph_c0	0.00170081	-1.15814	down	--	--	--	--	--	--	Helix-loop-helix DNA-binding domain	Transcription factor bHLH87 OS=Arabidopsis thaliana OX=3702 GN=BHLH87 PE=1 SV=1	S	Function unknown	PREDICTED: transcription factor bHLH87 [Daucus carota subsp. sativus]
c72638.graph_c0	3.32992e-24	2.72113	up	--	--	Biological Process: response to water deprivation (GO:0009414);;	--	--	--	--	Transcription factor bHLH137 OS=Arabidopsis thaliana OX=3702 GN=BHLH137 PE=1 SV=1	K	Transcription	PREDICTED: transcription factor bHLH137-like isoform X1 [Daucus carota subsp. sativus]
c89826.graph_c0	9.19656e-06	-1.60302	down	--	--	--	--	--	--	Helix-loop-helix DNA-binding domain	Transcription factor bHLH63 OS=Arabidopsis thaliana OX=3702 GN=BHLH63 PE=1 SV=1	K	Transcription	PREDICTED: transcription factor bHLH63 [Daucus carota subsp. sativus]
c89514.graph_c0	1.10057e-10	1.35652	up	--	--	Molecular Function: protein serine/threonine kinase activity (GO:0004674);; Cellular Component: cytosol (GO:0005829);; Biological Process: protein phosphorylation (GO:0006468);; Biological Process: intracellular signal transduction (GO:0035556);;	--	--	--	bHLH-MYC and R2R3-MYB transcription factors N-terminal	Protein RICE SALT SENSITIVE 3 OS=Oryza sativa subsp. japonica OX=39947 GN=RSS3 PE=1 SV=1	S	Function unknown	PREDICTED: uncharacterized protein LOC108220098 isoform X1 [Daucus carota subsp. sativus]
c86593.graph_c0	0.00569775	-1.18855	down	--	--	--	K13422|2.30276e-158|vvi:100246135|K13422 transcription factor MYC2 | (RefSeq) transcription factor MYC4	--	--	bHLH-MYC and R2R3-MYB transcription factors N-terminal;; Helix-loop-helix DNA-binding domain	Transcription factor MYC4 OS=Arabidopsis thaliana OX=3702 GN=MYC4 PE=1 SV=1	S	Function unknown	hypothetical protein DCAR_006548 [Daucus carota subsp. sativus]
c85467.graph_c0	2.18048e-13	2.21157	up	--	--	--	--	--	--	Helix-loop-helix DNA-binding domain	Transcription factor bHLH66 OS=Arabidopsis thaliana OX=3702 GN=BHLH66 PE=1 SV=1	K	Transcription	PREDICTED: transcription factor bHLH66 isoform X1 [Daucus carota subsp. sativus]
Zinc finger
c73148.graph_c0	0.000413164	2.78333	up	--	--	--	K15692|1.47344e-28|smo:SELMODRAFT_47510|K15692 E3 ubiquitin-protein ligase RNF13 [EC:2.3.2.27] | (RefSeq) hypothetical protein	[O]	Posttranslational modification, protein turnover, chaperones	Ring finger domain;; RING-like zinc finger;; PA domain;; RING-H2 zinc finger domain;; Zinc finger, C3HC4 type (RING finger);; Zinc finger, C3HC4 type (RING finger)	Receptor homology region, transmembrane domain- and RING domain-containing protein 1 OS=Arabidopsis thaliana OX=3702 GN=RMR1 PE=2 SV=1	O	Posttranslational modification, protein turnover, chaperones	hypothetical protein SELMODRAFT_47510, partial [Selaginella moellendorffii]
c60794.graph_c0	0.00660579	2.28942	up	--	--	--	--	--	--	Zinc finger C-x8-C-x5-C-x3-H type (and similar)	--	S	Function unknown	--
c72594.graph_c0	0.000348377	1.74519	up	--	--	Cellular Component: membrane (GO:0016020);; Molecular Function: metal ion binding (GO:0046872);;	K16281|4.25215e-66|vvi:100244721|K16281 RING-H2 zinc finger protein RHA1 | (RefSeq) E3 ubiquitin-protein ligase RHA1B	[O]	Posttranslational modification, protein turnover, chaperones	Ring finger domain;; RING-like zinc finger;; RING-H2 zinc finger domain;; Zinc finger, C3HC4 type (RING finger);; zinc-RING finger domain;; Zinc finger, C3HC4 type (RING finger);; Anaphase-promoting complex subunit 11 RING-H2 finger;; Prokaryotic RING finger family 4	E3 ubiquitin-protein ligase RHA1B OS=Arabidopsis thaliana OX=3702 GN=RHA1B PE=2 SV=1	O	Posttranslational modification, protein turnover, chaperones	PREDICTED: E3 ubiquitin-protein ligase RHA1B-like [Daucus carota subsp. sativus]
c83521.graph_c1	7.33111e-06	1.43852	up	--	--	--	K16285|6.8506e-35|spen:107023960|K16285 RING/U-box domain-containing protein [EC:2.3.2.27] | (RefSeq) probable E3 ubiquitin-protein ligase XERICO	[O]	Posttranslational modification, protein turnover, chaperones	Ring finger domain;; RING-H2 zinc finger domain;; RING-like zinc finger;; Zinc finger, C3HC4 type (RING finger);; Zinc finger, C3HC4 type (RING finger);; RING-type zinc-finger;; Anaphase-promoting complex subunit 11 RING-H2 finger;; zinc-RING finger domain;; Zinc finger, C3HC4 type (RING finger)	Probable E3 ubiquitin-protein ligase XERICO OS=Arabidopsis thaliana OX=3702 GN=XERICO PE=1 SV=1	O	Posttranslational modification, protein turnover, chaperones	PREDICTED: probable E3 ubiquitin-protein ligase XERICO [Daucus carota subsp. sativus]
c87209.graph_c0	0.00332539	1.38221	up	--	--	Molecular Function: organic cyclic compound binding (GO:0097159);; Molecular Function: heterocyclic compound binding (GO:1901363);;	--	--	--	--	--	S	Function unknown	PREDICTED: zinc finger CCCH domain-containing protein 22 isoform X1 [Daucus carota subsp. sativus]
c91267.graph_c0	0.00809781	1.23639	up	--	--	Molecular Function: RNA polymerase II regulatory region sequence-specific DNA binding (GO:0000977);; Molecular Function: transcription factor activity, sequence-specific DNA binding (GO:0003700);; Cellular Component: nucleus (GO:0005634);; Biological Process: regulation of transcription from RNA polymerase II promoter (GO:0006357);;	--	[L]	Replication, recombination and repair	hAT family C-terminal dimerisation region;; Domain of unknown function (DUF4413);; BED zinc finger	Zinc finger BED domain-containing protein DAYSLEEPER OS=Arabidopsis thaliana OX=3702 GN=HAT PE=1 SV=1	S	Function unknown	PREDICTED: zinc finger BED domain-containing protein DAYSLEEPER-like [Daucus carota subsp. sativus]
c88189.graph_c0	0.000113216	-1.17553	down	--	--	--	K10664|1.73513e-85|rcu:8285527|K10664 E3 ubiquitin-protein ligase ATL6/9/15/31/42/55 [EC:2.3.2.27] | (RefSeq) E3 ubiquitin-protein ligase ATL6	[O]	Posttranslational modification, protein turnover, chaperones	Ring finger domain;; RING-like zinc finger;; RING-H2 zinc finger domain;; Zinc finger, C3HC4 type (RING finger);; RING-type zinc-finger;; Zinc finger, C3HC4 type (RING finger);; Anaphase-promoting complex subunit 11 RING-H2 finger	E3 ubiquitin-protein ligase ATL6 OS=Arabidopsis thaliana OX=3702 GN=ATL6 PE=1 SV=2	O	Posttranslational modification, protein turnover, chaperones	PREDICTED: E3 ubiquitin-protein ligase ATL6 [Daucus carota subsp. sativus]
c83228.graph_c0	0.00034333	-1.29427	down	--	--	Cellular Component: membrane (GO:0016020);; Biological Process: proteasome-mediated ubiquitin-dependent protein catabolic process (GO:0043161);; Molecular Function: metal ion binding (GO:0046872);; Molecular Function: ubiquitin protein ligase activity (GO:0061630);;	--	[O]	Posttranslational modification, protein turnover, chaperones	Ring finger domain;; RING-H2 zinc finger domain;; RING-like zinc finger;; Anaphase-promoting complex subunit 11 RING-H2 finger;; Zinc finger, C3HC4 type (RING finger);; Zinc finger, C3HC4 type (RING finger)	RING-H2 finger protein ATL13 OS=Arabidopsis thaliana OX=3702 GN=ATL13 PE=2 SV=2	O	Posttranslational modification, protein turnover, chaperones	PREDICTED: RING-H2 finger protein ATL13-like [Daucus carota subsp. sativus]
c78549.graph_c0	6.81777e-08	-1.5463	down	--	--	--	--	--	--	--	Putative zinc finger protein At1g68190 OS=Arabidopsis thaliana OX=3702 GN=At1g68190 PE=2 SV=1	S	Function unknown	hypothetical protein DCAR_026755 [Daucus carota subsp. sativus]
c82474.graph_c1	1.20352e-13	-1.5833	down	--	--	Molecular Function: metal ion binding (GO:0046872);;	--	[R]	General function prediction only	AN1-like Zinc finger	Zinc finger A20 and AN1 domain-containing stress-associated protein 5 OS=Arabidopsis thaliana OX=3702 GN=SAP5 PE=2 SV=1	S	Function unknown	PREDICTED: zinc finger A20 and AN1 domain-containing stress-associated protein 5-like [Daucus carota subsp. sativus]
c80980.graph_c0	0.000981675	-1.72878	down	--	--	--	--	--	--	--	--	S	Function unknown	PREDICTED: zinc finger SWIM domain-containing protein 7 [Daucus carota subsp. sativus]
c83600.graph_c0	0.00010742	-1.80279	down	--	--	--	--	[O]	Posttranslational modification, protein turnover, chaperones	Ring finger domain;; RING-like zinc finger;; RING-H2 zinc finger domain;; Zinc finger, C3HC4 type (RING finger);; Anaphase-promoting complex subunit 11 RING-H2 finger	RING-H2 finger protein ATL60 OS=Arabidopsis thaliana OX=3702 GN=ATL60 PE=2 SV=1	O	Posttranslational modification, protein turnover, chaperones	PREDICTED: RING-H2 finger protein ATL3-like [Daucus carota subsp. sativus]
c80054.graph_c0	0.00224987	-2.38351	down	--	--	--	--	[R]	General function prediction only	Zn-finger in Ran binding protein and others	RanBP2-type zinc finger protein At1g67325 OS=Arabidopsis thaliana OX=3702 GN=At1g67325 PE=1 SV=1	S	Function unknown	PREDICTED: zinc finger Ran-binding domain-containing protein 2-like isoform X1 [Daucus carota subsp. sativus]
c72786.graph_c0	4.91429e-07	-2.44691	down	--	--	--	K19041|4.28238e-67|sind:105176691|K19041 E3 ubiquitin-protein ligase RNF38/44 [EC:2.3.2.27] | (RefSeq) NEP1-interacting protein 1-like	[O]	Posttranslational modification, protein turnover, chaperones	Ring finger domain;; RING-like zinc finger;; RING-H2 zinc finger domain;; Zinc finger, C3HC4 type (RING finger);; Anaphase-promoting complex subunit 11 RING-H2 finger;; Zinc finger, C3HC4 type (RING finger);; RING-type zinc-finger	NEP1-interacting protein 1 OS=Arabidopsis thaliana OX=3702 GN=NIP1 PE=1 SV=2	O	Posttranslational modification, protein turnover, chaperones	PREDICTED: NEP1-interacting protein 1 [Daucus carota subsp. sativus]
c50110.graph_c0	0.00474552	2.35558	up	--	--	--	--	[T]	Signal transduction mechanisms	Ligand-binding domain of nuclear hormone receptor;; Zinc finger, C4 type (two domains)	--	K	Transcription	--
c82688.graph_c0	9.10221e-05	1.65592	up	--	--	Cellular Component: membrane (GO:0016020);;	--	--	--	C1 domain;; Zinc finger, ZZ type	--	S	Function unknown	hypothetical protein DCAR_022828 [Daucus carota subsp. sativus]
c91703.graph_c1	1.96624e-09	1.27579	up	[G]	Carbohydrate transport and metabolism	Molecular Function: transcription cofactor activity (GO:0003712);; Molecular Function: histone acetyltransferase activity (GO:0004402);; Cellular Component: nucleus (GO:0005634);; Biological Process: regulation of transcription, DNA-templated (GO:0006355);; Molecular Function: zinc ion binding (GO:0008270);; Biological Process: histone acetylation (GO:0016573);;	--	[K]	Transcription	BTB/POZ domain;; TAZ zinc finger;; Carbohydrate phosphorylase	BTB/POZ and TAZ domain-containing protein 4 OS=Arabidopsis thaliana OX=3702 GN=BT4 PE=1 SV=1	S	Function unknown	PREDICTED: BTB/POZ and TAZ domain-containing protein 4 [Daucus carota subsp. sativus]
c89193.graph_c0	4.24888e-05	1.0601	up	--	--	--	K17987|1.30272e-170|cic:CICLE_v10024152mg|K17987 next to BRCA1 gene 1 protein | (RefSeq) hypothetical protein	[S]	Function unknown	Ig-like domain from next to BRCA1 gene;; PB1 domain;; Zinc finger, ZZ type	Protein NBR1 homolog OS=Arabidopsis thaliana OX=3702 GN=NBR1 PE=1 SV=1	S	Function unknown	PREDICTED: protein NBR1 homolog [Daucus carota subsp. sativus]
c81068.graph_c0	0.000119799	-1.07643	down	--	--	--	--	[O]	Posttranslational modification, protein turnover, chaperones	Ring finger domain;; RING-like zinc finger;; Zinc finger, C3HC4 type (RING finger);; RING-type zinc-finger;; Zinc finger, C3HC4 type (RING finger);; Anaphase-promoting complex subunit 11 RING-H2 finger	RING-H2 finger protein ATL2 OS=Arabidopsis thaliana OX=3702 GN=ATL2 PE=2 SV=2	O	Posttranslational modification, protein turnover, chaperones	PREDICTED: RING-H2 finger protein ATL2-like [Daucus carota subsp. sativus]
c86793.graph_c0	4.21158e-11	-2.04654	down	--	--	--	--	[R]	General function prediction only	Plus-3 domain;; GYF domain;; AN1-like Zinc finger	Uncharacterized protein At5g08430 OS=Arabidopsis thaliana OX=3702 GN=At5g08430 PE=1 SV=2	B	Chromatin structure and dynamics	PREDICTED: uncharacterized protein At5g08430-like isoform X2 [Daucus carota subsp. sativus]
c93243.graph_c0	0.000636272	2.72582	up	[O]	Posttranslational modification, protein turnover, chaperones	Molecular Function: ATP binding (GO:0005524);; Cellular Component: nucleus (GO:0005634);; Cellular Component: chaperonin-containing T-complex (GO:0005832);; Cellular Component: cytoskeleton (GO:0005856);; Biological Process: protein folding (GO:0006457);; Molecular Function: unfolded protein binding (GO:0051082);;	K09495|0|ppp:PHYPADRAFT_217424|K09495 T-complex protein 1 subunit gamma | (RefSeq) hypothetical protein	[O]	Posttranslational modification, protein turnover, chaperones	TCP-1/cpn60 chaperonin family	T-complex protein 1 subunit gamma OS=Arabidopsis thaliana OX=3702 GN=CCT3 PE=1 SV=1	O	Posttranslational modification, protein turnover, chaperones	T-complex protein 1 [Basidiobolus meristosporus CBS 931.73]
c44068.graph_c0	0.000643191	2.72111	up	[O]	Posttranslational modification, protein turnover, chaperones	Molecular Function: DNA binding (GO:0003677);; Molecular Function: protein binding (GO:0005515);; Cellular Component: mitochondrial envelope (GO:0005740);; Cellular Component: mitochondrial matrix (GO:0005759);; Biological Process: protein folding (GO:0006457);; Biological Process: cellular component organization (GO:0016043);;	K04077|0|ppp:PHYPADRAFT_226792|K04077 chaperonin GroEL | (RefSeq) hypothetical protein	[O]	Posttranslational modification, protein turnover, chaperones	TCP-1/cpn60 chaperonin family	Chaperonin CPN60-2, mitochondrial OS=Zea mays OX=4577 GN=CPN60II PE=2 SV=1	O	Posttranslational modification, protein turnover, chaperones	chaperonin GroL [Spizellomyces punctatus DAOM BR117]
c42947.graph_c1	0.00122618	2.61201	up	[O]	Posttranslational modification, protein turnover, chaperones	Molecular Function: ATP binding (GO:0005524);; Cellular Component: cytoplasm (GO:0005737);; Biological Process: protein folding (GO:0006457);; Molecular Function: unfolded protein binding (GO:0051082);;	K09496|0|smo:SELMODRAFT_102150|K09496 T-complex protein 1 subunit delta | (RefSeq) hypothetical protein	[O]	Posttranslational modification, protein turnover, chaperones	TCP-1/cpn60 chaperonin family	T-complex protein 1 subunit delta OS=Arabidopsis thaliana OX=3702 GN=CCT4 PE=1 SV=1	O	Posttranslational modification, protein turnover, chaperones	putative t-complex protein 1 delta subunit (tcp-1-delta) [Basidiobolus meristosporus CBS 931.73]
c43320.graph_c0	0.00127892	2.60717	up	[O]	Posttranslational modification, protein turnover, chaperones	Molecular Function: binding (GO:0005488);;	K09500|6.84075e-171|gsl:Gasu_15830|K09500 T-complex protein 1 subunit theta | (RefSeq) T-complex protein 1 subunit	[O]	Posttranslational modification, protein turnover, chaperones	TCP-1/cpn60 chaperonin family	T-complex protein 1 subunit theta OS=Arabidopsis thaliana OX=3702 GN=CCT8 PE=1 SV=1	O	Posttranslational modification, protein turnover, chaperones	T-complex protein 1 [Basidiobolus meristosporus CBS 931.73]
c81250.graph_c0	0.00353845	2.41429	up	[O]	Posttranslational modification, protein turnover, chaperones	Molecular Function: ATP binding (GO:0005524);; Cellular Component: nucleus (GO:0005634);; Cellular Component: chaperonin-containing T-complex (GO:0005832);; Biological Process: protein folding (GO:0006457);; Molecular Function: unfolded protein binding (GO:0051082);;	K09498|0|csl:COCSUDRAFT_38097|K09498 T-complex protein 1 subunit zeta | (RefSeq) T-complex protein, zeta subunit	[O]	Posttranslational modification, protein turnover, chaperones	TCP-1/cpn60 chaperonin family	T-complex protein 1 subunit zeta 2 OS=Arabidopsis thaliana OX=3702 GN=CCT6B PE=1 SV=1	O	Posttranslational modification, protein turnover, chaperones	Cct6p [Rhizophagus irregularis DAOM 197198w]
c38300.graph_c0	0.00536879	2.329	up	[O]	Posttranslational modification, protein turnover, chaperones	Molecular Function: ATP binding (GO:0005524);; Cellular Component: nucleus (GO:0005634);; Cellular Component: chaperonin-containing T-complex (GO:0005832);; Biological Process: protein folding (GO:0006457);; Molecular Function: unfolded protein binding (GO:0051082);;	K09494|0|bpg:Bathy01g05540|K09494 T-complex protein 1 subunit beta | (RefSeq) T-complex protein 1 subunit beta	[O]	Posttranslational modification, protein turnover, chaperones	TCP-1/cpn60 chaperonin family	T-complex protein 1 subunit beta OS=Arabidopsis thaliana OX=3702 GN=CCT2 PE=1 SV=1	O	Posttranslational modification, protein turnover, chaperones	predicted protein [Hordeum vulgare subsp. vulgare]
B3
c91620.graph_c0	4.33251e-07	1.33959	up	--	--	--	--	--	--	B3 DNA binding domain;; CW-type Zinc Finger	B3 domain-containing protein Os07g0563300 OS=Oryza sativa subsp. japonica OX=39947 GN=Os07g0563300 PE=3 SV=2	K	Transcription	PREDICTED: B3 domain-containing protein Os07g0563300-like isoform X1 [Daucus carota subsp. sativus]
DBB family
c80809.graph_c0	3.55242e-09	1.81151	up	--	--	Cellular Component: intracellular (GO:0005622);;	--	--	--	--	B-box zinc finger protein 18 OS=Arabidopsis thaliana OX=3702 GN=BBX18 PE=1 SV=2	S	Function unknown	PREDICTED: B-box zinc finger protein 18-like [Daucus carota subsp. sativus]
c81494.graph_c0	0.000860356	-1.06107	down	--	--	--	--	--	--	B-box zinc finger	B-box domain protein 31 OS=Arabidopsis thaliana OX=3702 GN=MIP1B PE=2 SV=1	S	Function unknown	PREDICTED: zinc finger protein CONSTANS-LIKE 12-like [Daucus carota subsp. sativus]
c82467.graph_c0	2.61754e-08	-2.55867	down	--	--	Cellular Component: intracellular (GO:0005622);; Biological Process: response to red or far red light (GO:0009639);;	--	--	--	B-box zinc finger	B-box zinc finger protein 21 OS=Arabidopsis thaliana OX=3702 GN=BBX21 PE=1 SV=1	S	Function unknown	PREDICTED: B-box zinc finger protein 21-like [Daucus carota subsp. sativus]
c70778.graph_c0	1.26353e-07	-1.40602	down	--	--	--	--	--	--	B-box zinc finger	B-box domain protein 30 OS=Arabidopsis thaliana OX=3702 GN=MIP1A PE=1 SV=1	S	Function unknown	PREDICTED: B-box domain protein 30-like [Daucus carota subsp. sativus]
CO-like
c88554.graph_c0	7.52431e-13	1.68261	up	--	--	--	--	--	--	B-box zinc finger;; CCT motif	Zinc finger protein CONSTANS-LIKE 15 OS=Arabidopsis thaliana OX=3702 GN=COL15 PE=1 SV=1	S	Function unknown	PREDICTED: zinc finger protein CONSTANS-LIKE 15 isoform X2 [Daucus carota subsp. sativus]
c85596.graph_c1	2.2e-05	1.31472	up	--	--	--	--	[K]	Transcription	B-box zinc finger;; CCT motif	Zinc finger protein CONSTANS-LIKE 6 OS=Arabidopsis thaliana OX=3702 GN=COL6 PE=2 SV=2	K	Transcription	PREDICTED: zinc finger protein CONSTANS-LIKE 16-like [Daucus carota subsp. sativus]
c84614.graph_c0	0.000142336	-1.06923	down	--	--	--	--	[K]	Transcription	B-box zinc finger;; CCT motif	Zinc finger protein CONSTANS-LIKE 5 OS=Arabidopsis thaliana OX=3702 GN=COL5 PE=2 SV=2	K	Transcription	PREDICTED: zinc finger protein CONSTANS-LIKE 5 [Daucus carota subsp. sativus]
c91169.graph_c1	7.45507e-06	1.92479	up	--	--	--	--	--	--	--	Zinc finger protein CONSTANS-LIKE 10 OS=Arabidopsis thaliana OX=3702 GN=COL10 PE=1 SV=1	S	Function unknown	hypothetical protein DCAR_021082 [Daucus carota subsp. sativus]
c91169.graph_c0	5.60904e-11	1.9117	up	--	--	--	--	--	--	B-box zinc finger	Zinc finger protein CONSTANS-LIKE 10 OS=Arabidopsis thaliana OX=3702 GN=COL10 PE=1 SV=1	S	Function unknown	PREDICTED: zinc finger protein CONSTANS-LIKE 10-like [Daucus carota subsp. sativus]
C3H
c90194.graph_c0	2.91356e-15	1.40715	up	--	--	--	--	[R]	General function prediction only	Zinc finger C-x8-C-x5-C-x3-H type (and similar)	Zinc finger CCCH domain-containing protein 6 OS=Oryza sativa subsp. japonica OX=39947 GN=Os01g0258700 PE=2 SV=2	S	Function unknown	PREDICTED: zinc finger CCCH domain-containing protein 34-like isoform X1 [Daucus carota subsp. sativus]
c82364.graph_c1	8.6612e-05	1.22327	up	--	--	--	--	[R]	General function prediction only	Zinc finger C-x8-C-x5-C-x3-H type (and similar);; RNA-binding, Nab2-type zinc finger	Zinc finger CCCH domain-containing protein 3 OS=Arabidopsis thaliana OX=3702 GN=At1g04990 PE=2 SV=1	S	Function unknown	PREDICTED: zinc finger CCCH domain-containing protein 3-like [Daucus carota subsp. sativus]
c87248.graph_c0	5.9918e-12	1.0891	up	--	--	--	--	[R]	General function prediction only	Zinc finger C-x8-C-x5-C-x3-H type (and similar);; Zinc-binding RING-finger;; Zinc finger C-x8-C-x5-C-x3-H type (and similar);; Cellulose synthase	Zinc finger CCCH domain-containing protein 3 OS=Arabidopsis thaliana OX=3702 GN=At1g04990 PE=2 SV=1	S	Function unknown	PREDICTED: zinc finger CCCH domain-containing protein 3-like [Daucus carota subsp. sativus]
c86400.graph_c0	5.00967e-09	-1.58404	down	--	--	--	--	[R]	General function prediction only	Ankyrin repeat;; Ankyrin repeats (3 copies);; Ankyrin repeats (many copies);; Ankyrin repeat	Zinc finger CCCH domain-containing protein 29 OS=Arabidopsis thaliana OX=3702 GN=At2g40140 PE=1 SV=1	S	Function unknown	PREDICTED: zinc finger CCCH domain-containing protein 29-like [Daucus carota subsp. sativus]
c86139.graph_c0	3.01032e-10	-2.43093	down	--	--	--	--	[R]	General function prediction only	Ankyrin repeat;; Ankyrin repeats (3 copies);; Ankyrin repeats (many copies);; Ankyrin repeat	Zinc finger CCCH domain-containing protein 29 OS=Arabidopsis thaliana OX=3702 GN=At2g40140 PE=1 SV=1	S	Function unknown	PREDICTED: zinc finger CCCH domain-containing protein 29-like [Daucus carota subsp. sativus]
c83387.graph_c0	4.23757e-06	-2.22188	down	--	--	Molecular Function: nucleic acid binding (GO:0003676);;	--	--	--	OST-HTH/LOTUS domain;; RNA recognition motif. (a.k.a. RRM, RBD, or RNP domain)	Zinc finger CCCH domain-containing protein 18 OS=Arabidopsis thaliana OX=3702 GN=At2g05160 PE=2 SV=1	S	Function unknown	PREDICTED: zinc finger CCCH domain-containing protein 18-like isoform X1 [Daucus carota subsp. sativus]
c92144.graph_c0	9.74663e-27	-1.61467	down	--	--	Biological Process: regulation of cyclin-dependent protein serine/threonine kinase activity (GO:0000079);; Molecular Function: protein kinase binding (GO:0019901);;	--	[R]	General function prediction only	Cyclin;; Cyclin, N-terminal domain;; Zinc finger C-x8-C-x5-C-x3-H type (and similar)	Cyclin-U1-1 OS=Arabidopsis thaliana OX=3702 GN=CYCU1-1 PE=1 SV=1	S	Function unknown	PREDICTED: zinc finger CCCH domain-containing protein 13 isoform X2 [Daucus carota subsp. sativus]
C2H2
c77844.graph_c0	4.71952e-06	-1.01939	down	--	--	Molecular Function: binding (GO:0005488);;	--	[R]	General function prediction only	A20-like zinc finger;; AN1-like Zinc finger	Zinc finger A20 and AN1 domain-containing stress-associated protein 1 OS=Arabidopsis thaliana OX=3702 GN=SAP1 PE=1 SV=1	S	Function unknown	PREDICTED: zinc finger A20 and AN1 domain-containing stress-associated protein 1 [Daucus carota subsp. sativus]
c86688.graph_c0	2.0933e-09	-2.01307	down	--	--	Molecular Function: binding (GO:0005488);;	--	[R]	General function prediction only	Zinc finger, C2H2 type;; C2H2-type zinc finger	Zinc finger protein WIP3 OS=Arabidopsis thaliana OX=3702 GN=WIP3 PE=2 SV=1	S	Function unknown	PREDICTED: zinc finger protein WIP3 [Daucus carota subsp. sativus]
c81750.graph_c0	8.29038e-08	-2.02433	down	--	--	--	--	--	--	--	Zinc finger protein GIS OS=Arabidopsis thaliana OX=3702 GN=GIS PE=1 SV=1	S	Function unknown	PREDICTED: zinc finger protein 8 [Daucus carota subsp. sativus]
c82479.graph_c0	1.14355e-07	-2.03225	down	--	--	Molecular Function: nucleic acid binding (GO:0003676);;	--	[R]	General function prediction only	C2H2-type zinc finger;; C2H2-type zinc finger;; Zinc-finger double-stranded RNA-binding	Zinc finger protein ZAT5 OS=Arabidopsis thaliana OX=3702 GN=ZAT5 PE=2 SV=1	S	Function unknown	PREDICTED: zinc finger protein ZAT5-like [Daucus carota subsp. sativus]
c84971.graph_c0	8.88867e-06	-2.31909	down	--	--	--	--	[R]	General function prediction only	C2H2-type zinc finger;; C2H2-type zinc finger;; Zinc-finger of C2H2 type	Zinc finger protein ZAT10 OS=Arabidopsis thaliana OX=3702 GN=ZAT10 PE=2 SV=1	S	Function unknown	PREDICTED: zinc finger protein ZAT10 [Daucus carota subsp. sativus]
AP2
c82741.graph_c0	8.45006e-44	-2.00544	down	--	--	Molecular Function: DNA binding (GO:0003677);; Molecular Function: transcription factor activity, sequence-specific DNA binding (GO:0003700);; Cellular Component: nucleus (GO:0005634);; Biological Process: regulation of transcription, DNA-templated (GO:0006355);;	K09287|1.39381e-162|vvi:100262843|K09287 RAV-like factor | (RefSeq) AP2/ERF and B3 domain-containing transcription factor RAV1	--	--	B3 DNA binding domain;; AP2 domain	AP2/ERF and B3 domain-containing transcription repressor TEM1 OS=Arabidopsis thaliana OX=3702 GN=TEM1 PE=1 SV=1	K	Transcription	PREDICTED: AP2/ERF and B3 domain-containing transcription factor RAV1-like [Daucus carota subsp. sativus]
SNF
c61194.graph_c0	0.000318184	2.82567	up	[S]	Function unknown	Cellular Component: nuclear chromatin (GO:0000790);; Molecular Function: DNA binding (GO:0003677);; Molecular Function: helicase activity (GO:0004386);; Molecular Function: ATP binding (GO:0005524);; Biological Process: transcription from RNA polymerase II promoter (GO:0006366);; Cellular Component: RSC complex (GO:0016586);;	--	[BK]	--	SNF2 family N-terminal domain;; Helicase conserved C-terminal domain;; Bromodomain;; Snf2-ATP coupling, chromatin remodelling complex;; BRK domain;; Type III restriction enzyme, res subunit;; HSA	Probable ATP-dependent DNA helicase CHR12 OS=Arabidopsis thaliana OX=3702 GN=CHR12 PE=2 SV=1	BK	--	ATP-dependent DNA helicase Snf21 [Schizosaccharomyces japonicus yFS275]
c70201.graph_c0	0.00243945	2.4863	up	[S]	Function unknown	--	K11320|0|smo:SELMODRAFT_450749|K11320 E1A-binding protein p400 [EC:3.6.4.-] | (RefSeq) CHR13-2; hypothetical protein	[R]	General function prediction only	SNF2 family N-terminal domain;; Helicase conserved C-terminal domain;; HSA	Protein PHOTOPERIOD-INDEPENDENT EARLY FLOWERING 1 OS=Arabidopsis thaliana OX=3702 GN=PIE1 PE=1 SV=1	L	Replication, recombination and repair	protein PHOTOPERIOD-INDEPENDENT EARLY FLOWERING 1 isoform X3 [Setaria italica]
PHD
c81455.graph_c0	0.000137102	1.45323	up	--	--	Cellular Component: nucleus (GO:0005634);; Molecular Function: zinc ion binding (GO:0008270);; Molecular Function: methylated histone binding (GO:0035064);;	K11346|2.60749e-132|sind:105170630|K11346 inhibitor of growth protein 4 | (RefSeq) PHD finger protein ING2	[B]	Chromatin structure and dynamics	Inhibitor of growth proteins N-terminal histone-binding;; PHD-finger	PHD finger protein ING2 OS=Arabidopsis thaliana OX=3702 GN=ING2 PE=1 SV=1	B	Chromatin structure and dynamics	PREDICTED: PHD finger protein ING2-like isoform X1 [Daucus carota subsp. sativus]
LSD
c86961.graph_c0	0.00318621	-1.13312	down	--	--	--	--	--	--	LSD1 zinc finger;; LSD1 zinc finger	Protein LOL1 OS=Arabidopsis thaliana OX=3702 GN=LOL1 PE=2 SV=1	S	Function unknown	protein LOL1 [Manihot esculenta]
